# Supplementary material
Source: HighWire-hosted journal article supplement (doi:10.1101/rna.080004.124)
Supplement: SuppTable2.xlsx [file SuppTable2.xlsx]

## Sheet: Sheet1
Transcript ID	tRNA name	Annot. Pos.	Region	AC	ref base	Annot. Mods	LB Misincorporation Freq.	LB Avg. Depth	LB Term. Score	CDM Misincorporation Freq.	CDM Avg. Depth	CDM Term. Score
EBT00001514709	LeuX	1	Acc-stem	CAA	G	G	NA	14.3333	NA	NA	99.6667	NA
EBT00001514709	LeuX	2	Acc-stem	CAA	C	C	NA	15.6667	NA	NA	99.6667	NA
EBT00001514709	LeuX	3	Acc-stem	CAA	C	C	NA	16	NA	NA	99.6667	NA
EBT00001514709	LeuX	4	Acc-stem	CAA	G	G	NA	16	NA	NA	99.6667	NA
EBT00001514709	LeuX	5	Acc-stem	CAA	A	A	NA	16.6667	NA	NA	99.6667	NA
EBT00001514709	LeuX	6	Acc-stem	CAA	A	A	NA	16.6667	NA	NA	99.6667	NA
EBT00001514709	LeuX	7	Acc-stem	CAA	G	G	NA	16.6667	NA	NA	99.6667	NA
EBT00001514709	LeuX	8		CAA	T	s4U	NA	16.6667	NA	0.186299	102.667	0
EBT00001514709	LeuX	9		CAA	G	G	NA	16.6667	NA	0.00199601	102.667	0.109827
EBT00001514709	LeuX	10	D-stem	CAA	G	G	NA	16.6667	NA	0	115.333	0
EBT00001514709	LeuX	11	D-stem	CAA	C	C	NA	16.6667	NA	0.004041	115.333	0
EBT00001514709	LeuX	12	D-stem	CAA	G	G	NA	17	NA	0.00199601	115.333	0
EBT00001514709	LeuX	13	D-stem	CAA	A	A	NA	17.3333	NA	0	115.333	0
EBT00001514709	LeuX	14	D-loop	CAA	A	A	NA	18	NA	0	115.333	0
EBT00001514709	LeuX	15	D-loop	CAA	A	A	NA	19	NA	0	115.333	0.229399
EBT00001514709	LeuX	16	D-loop	CAA	T	D	NA	21.3333	NA	0	149.667	0
EBT00001514709	LeuX	17	D-loop	CAA	C	C	NA	21.3333	NA	0.00204499	149.667	0
EBT00001514709	LeuX	18	D-loop	CAA	G	Gm	NA	21.3333	NA	0	149.667	0
EBT00001514709	LeuX	19	D-loop	CAA	G	G	NA	21.3333	NA	0	149.667	0
EBT00001514709	LeuX	20	D-loop	CAA	T	D	NA	22.3333	NA	0.00327956	149.667	0
EBT00001514709	LeuX	20a	D-loop	CAA	A	A	NA	22.3333	NA	0	149.667	0
EBT00001514709	LeuX	21	D-loop	CAA	G	G	NA	22.3333	NA	0	149.667	0.00663717
EBT00001514709	LeuX	22	D-stem	CAA	A	A	NA	23	NA	0.002442	150.667	0
EBT00001514709	LeuX	23	D-stem	CAA	C	C	NA	23	NA	0.0228783	150.667	0
EBT00001514709	LeuX	24	D-stem	CAA	G	G	NA	23	NA	0	150.667	0
EBT00001514709	LeuX	25	D-stem	CAA	C	C	NA	23	NA	0	150.667	0
EBT00001514709	LeuX	26		CAA	A	A	NA	23	NA	0.00204499	150.667	0
EBT00001514709	LeuX	27	Ac-Stem	CAA	G	G	NA	23	NA	0.00204499	150.667	0
EBT00001514709	LeuX	28	Ac-Stem	CAA	T	U	NA	24.3333	NA	0.001221	150.667	0
EBT00001514709	LeuX	29	Ac-Stem	CAA	T	U	NA	24.6667	NA	0.00326599	150.667	0
EBT00001514709	LeuX	30	Ac-Stem	CAA	G	G	NA	25	NA	0	150.667	0
EBT00001514709	LeuX	31	Ac-Stem	CAA	A	A	NA	29.3333	NA	0	150.667	0.15197
EBT00001514709	LeuX	32	Ac-loop	CAA	T	Y	NA	36.6667	NA	0	177.667	0
EBT00001514709	LeuX	33	Ac-loop	CAA	T	U	NA	40.3333	NA	0	177.667	0.603127
EBT00001514709	LeuX	34	Ac-loop	CAA	C	Cm	0.00303335	429.333	0.534346	0.000616143	447.667	0.330175
EBT00001514709	LeuX	35	Ac-loop	CAA	A	A	0.00100284	922	0.295287	0	668.333	0.31076
EBT00001514709	LeuX	36	Ac-loop	CAA	A	A	0.000880408	1308.33	0.348007	0.00110254	969.667	0.319373
EBT00001514709	LeuX	37	Ac-loop	CAA	A	ms2i6A	0.169774	2006.67	0.828909	0.17703	1424.67	0.798994
EBT00001514709	LeuX	38	Ac-loop	CAA	A	A	0.0148454	11728.7	0.209836	0.0140211	7087.67	0.217726
EBT00001514709	LeuX	39	Ac-stem	CAA	T	Y	0.000272312	14843.3	0.00669195	0.000133868	9060.33	0.00712303
EBT00001514709	LeuX	40	Ac-stem	CAA	C	C	0.000825232	14943.3	0.00636124	0.00147764	9125.33	0.00356701
EBT00001514709	LeuX	41	Ac-stem	CAA	A	A	0.00027336	15039	0.0018142	0.00173446	9158	0.000945455
EBT00001514709	LeuX	42	Ac-stem	CAA	A	A	0.000527866	15066.3	0.000972526	0.0026081	9166.67	3.63623e-05
EBT00001514709	LeuX	43	Ac-stem	CAA	C	C	0.00085187	15081	0.00229343	0.00271314	9167	0.00174235
EBT00001514709	LeuX	44	V-region	CAA	C	C	0.00165025	15115.7	0.00171712	0.00347653	9183	0
EBT00001514709	LeuX	V1	V-region	CAA	G	G	0.000841138	15141.7	0.0150053	0.00137798	9183	0.00314807
EBT00001514709	LeuX	V2	V-region	CAA	T	U	0.00119448	15372.3	0.00155881	0.00481424	9212	0
EBT00001514709	LeuX	V3	V-region	CAA	A	A	0.000243957	15396.3	0.00194473	0.000608385	9211.67	0.000289404
EBT00001514709	LeuX	V8	V-region	CAA	G	G	0.00111005	15426.3	0.00827172	0.00204301	9214.33	0.00550439
EBT00001514709	LeuX	V9	V-region	CAA	A	A	0.000347771	15555	0.00581618	0.000604914	9265.33	0.00547426
EBT00001514709	LeuX	V10	V-region	CAA	A	A	0.000406232	15646	0.00744343	0.000664635	9316.33	0.00791566
EBT00001514709	LeuX	V11	V-region	CAA	A	A	0.000974629	15763.3	0.0173098	0.000477334	9390.67	0.0126174
EBT00001514709	LeuX	V17	V-region	CAA	T	U	0.0015178	16041	0.00343764	0.00535475	9510.67	0.00470925
EBT00001514709	LeuX	V18	V-region	CAA	A	A	0.000532807	16096.3	0.00111702	0.0005823	9555.67	0.000453278
EBT00001514709	LeuX	V19	V-region	CAA	C	C	0.000924443	16114.3	0.00175518	0.00289757	9560	0.00128844
EBT00001514709	LeuX	46	V-region	CAA	G	G	0.0019692	16142.7	0.00482913	0.00202548	9572.33	0.00114783
EBT00001514709	LeuX	48	V-region	CAA	T	U	0.0012944	16221	0.000451884	0.00468422	9583.33	0.000764632
EBT00001514709	LeuX	49	T-stem	CAA	G	G	0.00217236	16228.3	0.00288781	0.00204281	9590.67	0.000764048
EBT00001514709	LeuX	50	T-stem	CAA	C	C	0.00138833	16275.3	0.000798117	0.00258349	9598	0
EBT00001514709	LeuX	51	T-stem	CAA	C	C	0.00120715	16288.3	0.00022506	0.00347854	9598	0
EBT00001514709	LeuX	52	T-stem	CAA	G	G	0.0011295	16292	0.000204557	0.00200394	9598	0
EBT00001514709	LeuX	53	T-stem	CAA	G	G	0.00140899	16295.3	0.0020414	0.00261642	9598	0.000763465
EBT00001514709	LeuX	54	T-loop	CAA	T	T	0.00156992	16328.7	2.04e-05	0.00433263	9605.33	0.000277547
EBT00001514709	LeuX	55	T-loop	CAA	T	Y	0.000778963	16329	0	0.00200847	9608	0
EBT00001514709	LeuX	56	T-loop	CAA	C	C	0.00105565	16328.7	2.04e-05	0.00219776	9602.33	0.000589786
EBT00001514709	LeuX	57	T-loop	CAA	G	G	0.00101977	16329	0	0.00167635	9608	0
EBT00001514709	LeuX	58	T-loop	CAA	A	A	0.000378748	16329	0	0.000693855	9608	0
EBT00001514709	LeuX	59	T-loop	CAA	G	G	0.00135654	16329	0	0.0010257	9608	0
EBT00001514709	LeuX	60	T-loop	CAA	T	U	0.0013151	16329	0	0.00302437	9607.33	3.46946e-05
EBT00001514709	LeuX	61	T-stem	CAA	C	C	0.000815515	16328.3	2.04e-05	0.0013724	9607.67	3.46933e-05
EBT00001514709	LeuX	62	T-stem	CAA	C	C	0.0016315	16328.7	0	0.00543753	9608	0
EBT00001514709	LeuX	63	T-stem	CAA	G	G	0.0013231	16325.7	0.000183726	0.00206518	9608	0
EBT00001514709	LeuX	64	T-stem	CAA	G	G	0.0013559	16328.7	0	0.00246555	9608	0
EBT00001514709	LeuX	65	T-stem	CAA	C	C	0.00173558	16328.7	2.04e-05	0.00442239	9607.33	6.93867e-05
EBT00001514709	LeuX	66	Acc-stem	CAA	C	C	0.00109774	16329	0	0.00231905	9608	0
EBT00001514709	LeuX	67	Acc-stem	CAA	T	U	0.00344639	16328.7	0	0.0133379	9607.33	6.93867e-05
EBT00001514709	LeuX	68	Acc-stem	CAA	T	U	0.00166642	16328.7	0	0.00550925	9608	0
EBT00001514709	LeuX	69	Acc-stem	CAA	C	C	0.00176931	16328.3	0	0.00580539	9607.67	0
EBT00001514709	LeuX	70	Acc-stem	CAA	G	G	0.00280334	16326.7	0.000142895	0.0114377	9606.33	0.000138778
EBT00001514709	LeuX	71	Acc-stem	CAA	G	G	0.00218038	16329	0	0.00591534	9607.67	0
EBT00001514709	LeuX	72	Acc-stem	CAA	C	C	0.00166543	16328	6.12e-05	0.00291962	9607.67	0
EBT00001514709	LeuX	73		CAA	A	A	0.00211988	16329	0	0.00686091	9607.33	0
EBT00001514709	LeuX	74		CAA	C	C	0.000463394	16328.3	2.04e-05	0.00249086	9605.67	0.000138788
EBT00001514709	LeuX	75		CAA	C	C	0	16328.7	0	0	9607	0
EBT00001514709	LeuX	76		CAA	A	A	0	15303.3	0	0	8153.67	0
EBT00001514723	PheU	1	Acc-stem	GAA	G	G	0	198.333	0.0116279	0	444	0.00224719
EBT00001514723	PheU	2	Acc-stem	GAA	C	C	0	200.667	0.00823723	0	445	0.000748503
EBT00001514723	PheU	3	Acc-stem	GAA	C	C	0	202.333	0	0.00140251	445.333	0.000747943
EBT00001514723	PheU	4	Acc-stem	GAA	C	C	0	202.333	0	0.000511247	445.667	0
EBT00001514723	PheU	5	Acc-stem	GAA	G	G	0.00581345	202.333	0	0.153317	445.667	0
EBT00001514723	PheU	6	Acc-stem	GAA	G	G	0	202.333	0.00654665	0.00214362	445.667	0.0772947
EBT00001514723	PheU	7	Acc-stem	GAA	A	A	0	203.667	0.00326264	0.141408	483	0.595364
EBT00001514723	PheU	8		GAA	T	s4U	0.0328828	204.333	0.00487013	0.00339849	1193.67	0.0730003
EBT00001514723	PheU	9		GAA	A	A	0	205.333	0.00162075	0	1287.67	0.010502
EBT00001514723	PheU	10	D-stem	GAA	G	G	0.00197239	205.667	0.00644122	0.00127005	1301.33	0.0121457
EBT00001514723	PheU	11	D-stem	GAA	C	C	0	207	0.00956938	0.00878124	1317.33	0.0538664
EBT00001514723	PheU	12	D-stem	GAA	T	U	0.001287	209	0	0.00211224	1392.33	0
EBT00001514723	PheU	13	D-stem	GAA	C	C	0.00170068	209	0.00317965	0.00246128	1392.33	0.000239349
EBT00001514723	PheU	14	D-loop	GAA	A	A	0.00170068	209.667	0	0.00191339	1392.67	0
EBT00001514723	PheU	15	D-loop	GAA	G	G	0	209.667	0.0217729	0.00096249	1392.67	0.0164783
EBT00001514723	PheU	16	D-loop	GAA	T	D	0	214.333	0.0015528	0.00271073	1416	0
EBT00001514723	PheU	17	D-loop	GAA	C	C	0	214.667	0.00309597	0.692019	1416	0.0732984
EBT00001514723	PheU	18	D-loop	GAA	G	G	0.00477782	215.333	0.0015456	0.0015114	1528	0.00520833
EBT00001514723	PheU	19	D-loop	GAA	G	G	0.00189394	215.667	0.0357675	0.000440639	1536	0.040999
EBT00001514723	PheU	20	D-loop	GAA	T	D	0	223.667	0.0014881	0.00209947	1601.67	0.00743648
EBT00001514723	PheU	21	D-loop	GAA	A	A	0	224	0.00444444	0.000704597	1613.67	0.000206526
EBT00001514723	PheU	22	D-stem	GAA	G	G	0.00237248	225	0.00147929	0.000430209	1614	0.00329354
EBT00001514723	PheU	23	D-stem	GAA	A	A	0	225.333	0.00294985	0.000536803	1619.33	0
EBT00001514723	PheU	24	D-stem	GAA	G	G	0.00118203	226	0.0490884	0.000838214	1619.33	0.00796406
EBT00001514723	PheU	25	D-stem	GAA	C	C	0.00112994	237.667	0.0364865	0.00125473	1632.33	0.00244449
EBT00001514723	PheU	26		GAA	A	A	0.00169205	246.667	0.00937082	0.000555078	1636.33	0
EBT00001514723	PheU	27	Ac-Stem	GAA	G	G	0.00167504	249	0.00532623	0.000400491	1636.33	0.00385552
EBT00001514723	PheU	28	Ac-Stem	GAA	G	G	0.00133869	250.333	0	0	1642.67	0
EBT00001514723	PheU	29	Ac-Stem	GAA	G	G	0.00167504	250.333	0.00132979	0.000399497	1642.67	0
EBT00001514723	PheU	30	Ac-Stem	GAA	G	G	0	250.667	0.0371319	0	1642.67	0.00564972
EBT00001514723	PheU	31	Ac-Stem	GAA	A	A	0	260.333	0.0657895	0.000265182	1652	0.0080064
EBT00001514723	PheU	32	Ac-loop	GAA	T	Y	0.00151515	278.667	0.0423826	0.000288351	1665.33	0
EBT00001514723	PheU	33	Ac-loop	GAA	T	U	0.00548161	291	0.477871	0.00133022	1665.33	0.0396002
EBT00001514723	PheU	34	Ac-loop	GAA	G	G	0	557.333	0.185582	0.000678517	1734	0.0186757
EBT00001514723	PheU	35	Ac-loop	GAA	A	A	0	684.333	0.166464	0.000465549	1767	0.015416
EBT00001514723	PheU	36	Ac-loop	GAA	A	A	0.000269906	821	0.230793	0	1794.67	0.06544
EBT00001514723	PheU	37	Ac-loop	GAA	A	ms2i6A	0.206886	1067.33	0.727001	0.0330766	1920.33	0.311626
EBT00001514723	PheU	38	Ac-loop	GAA	A	A	0.00394605	3909.67	0.0415134	0.00354186	2789.67	0.0468109
EBT00001514723	PheU	39	Ac-stem	GAA	T	Y	0.000240689	4079	0.00423143	0.0011965	2926.67	0.00306574
EBT00001514723	PheU	40	Ac-stem	GAA	C	C	0.000823714	4096.33	0.00178702	0.00120666	2935.67	0.00328203
EBT00001514723	PheU	41	Ac-stem	GAA	C	C	0.00143911	4103.67	0.00121694	0.00354008	2945.33	0.000226296
EBT00001514723	PheU	42	Ac-stem	GAA	C	C	0.00196949	4108.67	0	0.00143589	2946	0.000791407
EBT00001514723	PheU	43	Ac-stem	GAA	C	C	0.0012674	4104	0	0.0021473	2948.33	0
EBT00001514723	PheU	44	V-region	GAA	G	G	0.00459132	3446.33	0.0837469	0.00112029	2808.67	0.0406467
EBT00001514723	PheU	45	V-region	GAA	T	U	0.00171405	3761.33	0.157093	0.00540247	2927.67	0.0563017
EBT00001514723	PheU	46	V-region	GAA	G	m7G	0.00129848	4462.33	0.222229	0.00559051	3102.33	0.190766
EBT00001514723	PheU	47	V-region	GAA	T	acp3U	0.124924	5737.33	0.125895	0.0367106	3833.67	0.0566765
EBT00001514723	PheU	48	V-region	GAA	C	C	0.000770279	6563.67	0.0218568	0.00129696	4064	0.0025362
EBT00001514723	PheU	49	T-stem	GAA	C	C	0.00100118	6710.33	0.107194	0.292913	4074.33	0.012203
EBT00001514723	PheU	50	T-stem	GAA	T	U	0.000866119	7516	0.0105753	0.290431	4124.67	0
EBT00001514723	PheU	51	T-stem	GAA	T	U	0.00189145	7596.33	0.00249497	0.28986	4124.67	0
EBT00001514723	PheU	52	T-stem	GAA	G	G	0.00200662	7615.33	0.00353295	0.00270539	4124.67	0.00274017
EBT00001514723	PheU	53	T-stem	GAA	G	G	0.00078781	7642.33	0.00576756	0.00206158	4136	0.00345354
EBT00001514723	PheU	54	T-loop	GAA	T	T	0.000516959	7686.67	0.000130078	0.00247268	4150.33	8.03085e-05
EBT00001514723	PheU	55	T-loop	GAA	T	Y	0.000371725	7687.67	0	0.000938372	4150.67	0
EBT00001514723	PheU	56	T-loop	GAA	C	C	0.118738	7687.67	0	0.159142	4150.67	0
EBT00001514723	PheU	57	T-loop	GAA	G	G	0.000134066	7687.33	4.34e-05	0.00235309	4150.67	0
EBT00001514723	PheU	58	T-loop	GAA	A	A	3.35e-05	7687.67	4.34e-05	0	4150.67	0
EBT00001514723	PheU	59	T-loop	GAA	T	U	0.000181764	7688	0	0.00219699	4150.67	0
EBT00001514723	PheU	60	T-loop	GAA	T	U	0.000402253	7688	0	0.00158996	4150.67	0
EBT00001514723	PheU	61	T-stem	GAA	C	C	0.00121583	7687.67	4.34e-05	0.00306997	4150.67	0
EBT00001514723	PheU	62	T-stem	GAA	C	C	0.00077701	7688	0	0.00263599	4147.67	0
EBT00001514723	PheU	63	T-stem	GAA	G	G	0.00109389	7686.67	0	0.0025096	3184.67	0.000836645
EBT00001514723	PheU	64	T-stem	GAA	A	A	0.000145286	7686.67	0.00017343	0.0748992	3187.33	0.232091
EBT00001514723	PheU	65	T-stem	GAA	G	G	0.00067337	7688	0	0.0584019	4150.67	0
EBT00001514723	PheU	66	Acc-stem	GAA	T	U	0.000355435	7688	0	0.0589703	4150.67	0
EBT00001514723	PheU	67	Acc-stem	GAA	C	C	0.00064885	7688	0	0.000657302	4150.33	8.03085e-05
EBT00001514723	PheU	68	Acc-stem	GAA	C	C	0.00155469	7688	0	0.0603177	4150.67	0
EBT00001514723	PheU	69	Acc-stem	GAA	G	G	0.00128165	7686	0.000260146	0.00146531	4150	0.000160617
EBT00001514723	PheU	70	Acc-stem	GAA	G	G	0.000933338	7688	0	0.00169818	4150.67	0
EBT00001514723	PheU	71	Acc-stem	GAA	G	G	0.00118021	7687.67	4.34e-05	0.00105163	4150.33	8.03085e-05
EBT00001514723	PheU	72	Acc-stem	GAA	C	C	0.00145725	7688	0	0.00129208	4150.67	0
EBT00001514723	PheU	73		GAA	A	A	0.00112717	7688	0	0.00270958	4150.67	0
EBT00001514723	PheU	74		GAA	C	C	0.00029658	7687.33	8.67e-05	0.00035983	4150.33	0
EBT00001514723	PheU	75		GAA	C	C	0	7688	0	0	4150.33	0
EBT00001514723	PheU	76		GAA	A	A	0	7240.33	0	0	3841.33	0
EBT00001514679	LeuZ	1	Acc-stem	UAA	G	G	NA	4.66667	NA	NA	97	NA
EBT00001514679	LeuZ	2	Acc-stem	UAA	C	C	NA	5.66667	NA	NA	97	NA
EBT00001514679	LeuZ	3	Acc-stem	UAA	C	C	NA	6	NA	NA	97.3333	NA
EBT00001514679	LeuZ	4	Acc-stem	UAA	C	C	NA	6	NA	NA	97.3333	NA
EBT00001514679	LeuZ	5	Acc-stem	UAA	G	G	NA	6	NA	NA	97.3333	NA
EBT00001514679	LeuZ	6	Acc-stem	UAA	G	G	NA	6	NA	NA	97.3333	NA
EBT00001514679	LeuZ	7	Acc-stem	UAA	A	A	NA	6	NA	0.00323625	106	0
EBT00001514679	LeuZ	8		UAA	T	s4U	NA	6	NA	0.0647249	106	0.216749
EBT00001514679	LeuZ	9		UAA	G	G	NA	6.33333	NA	0.0514403	135.333	0
EBT00001514679	LeuZ	10	D-stem	UAA	G	G	NA	6.33333	NA	0	135.333	0
EBT00001514679	LeuZ	11	D-stem	UAA	T	U	NA	6.33333	NA	0.012359	135.333	0
EBT00001514679	LeuZ	12	D-stem	UAA	G	G	NA	6.33333	NA	0.00268817	135.333	0
EBT00001514679	LeuZ	13	D-stem	UAA	G	G	NA	6.33333	NA	0	135.333	0.00490196
EBT00001514679	LeuZ	14	D-loop	UAA	A	A	NA	6.33333	NA	0	136	0.0831461
EBT00001514679	LeuZ	15	D-loop	UAA	A	A	NA	6.66667	NA	0.00205761	148.333	0.0388769
EBT00001514679	LeuZ	16	D-loop	UAA	T	D	NA	7.66667	NA	0.00443566	154.333	0.0354167
EBT00001514679	LeuZ	17	D-loop	UAA	C	C	NA	7.66667	NA	0.0018315	160	0
EBT00001514679	LeuZ	18	D-loop	UAA	G	Gm	NA	7.66667	NA	0.00241546	160	0
EBT00001514679	LeuZ	19	D-loop	UAA	G	G	NA	8.33333	NA	0.00424696	160	0.106145
EBT00001514679	LeuZ	20	D-loop	UAA	T	D	NA	8.66667	NA	0.00619856	179	0
EBT00001514679	LeuZ	20a	D-loop	UAA	A	A	NA	8.66667	NA	0	179	0.0164835
EBT00001514679	LeuZ	21	D-loop	UAA	G	G	NA	8.66667	NA	0	182	0.0353357
EBT00001514679	LeuZ	22	D-stem	UAA	A	A	NA	8.66667	NA	0.00205761	188.667	0
EBT00001514679	LeuZ	23	D-stem	UAA	C	C	NA	8.66667	NA	0	188.667	0.0357751
EBT00001514679	LeuZ	24	D-stem	UAA	A	A	NA	9	NA	0	195.667	0.0297521
EBT00001514679	LeuZ	25	D-stem	UAA	C	C	NA	9	NA	0.00176367	201.667	0.0532081
EBT00001514679	LeuZ	26		UAA	A	A	NA	9	NA	0.00151515	213	0.0229358
EBT00001514679	LeuZ	27	Ac-Stem	UAA	A	A	NA	9	NA	0	218	0.00152672
EBT00001514679	LeuZ	28	Ac-Stem	UAA	G	G	NA	9.33333	NA	0.00628515	218.333	0
EBT00001514679	LeuZ	29	Ac-Stem	UAA	G	G	NA	9.33333	NA	0.00163399	218.333	0.0507246
EBT00001514679	LeuZ	30	Ac-Stem	UAA	G	G	NA	10.3333	NA	0.00310078	230	0.0521978
EBT00001514679	LeuZ	31	Ac-Stem	UAA	A	A	NA	20.6667	NA	0.0320781	242.667	0.0761421
EBT00001514679	LeuZ	32	Ac-loop	UAA	T	Y	NA	31.6667	NA	0.045093	262.667	0.0932106
EBT00001514679	LeuZ	33	Ac-loop	UAA	T	U	NA	52	NA	0.0541078	289.667	0.450348
EBT00001514679	LeuZ	34	Ac-loop	UAA	T	cmnm5Um	0.00137741	383.667	0.427932	0.0733133	527	0.374109
EBT00001514679	LeuZ	35	Ac-loop	UAA	A	A	0.00258832	670.667	0.238167	0.00495688	842	0.194001
EBT00001514679	LeuZ	36	Ac-loop	UAA	A	A	0.00256101	880.333	0.299469	0.00908265	1044.67	0.228269
EBT00001514679	LeuZ	37	Ac-loop	UAA	A	ms2i6A	0.246592	1256.67	0.809702	0.167994	1353.67	0.759761
EBT00001514679	LeuZ	38	Ac-loop	UAA	A	A	0.0155767	6603.67	0.203354	0.015742	5634.67	0.212852
EBT00001514679	LeuZ	39	Ac-stem	UAA	T	Y	0.0004819	8289.33	0.00464297	0.000621757	7158.33	0.00398868
EBT00001514679	LeuZ	40	Ac-stem	UAA	C	C	0.000907739	8328	0.00382775	0.0023673	7187	0.00489223
EBT00001514679	LeuZ	41	Ac-stem	UAA	C	C	0.00155591	8360	0.00139359	0.00312643	7222.33	0.000322968
EBT00001514679	LeuZ	42	Ac-stem	UAA	C	C	0.000747332	8371.67	0.0116485	0.00213438	7224.67	0.00705516
EBT00001514679	LeuZ	43	Ac-stem	UAA	T	U	0.000391863	8470.33	0.00145395	0.00353646	7276	0
EBT00001514679	LeuZ	44	V-region	UAA	C	C	0.00183697	8482.67	0.00488797	0.00294882	7275.67	0.00333333
EBT00001514679	LeuZ	45	V-region	UAA	G	G	0.00112033	8524.33	0.00171761	0.0035731	7300	0.00168665
EBT00001514679	LeuZ	V1	V-region	UAA	G	G	0.000870401	8539	0.00183136	0.00239483	7312.33	0.00109285
EBT00001514679	LeuZ	V2	V-region	UAA	C	C	0.00118138	8554.67	0.0012842	0.00443663	7320.33	0
EBT00001514679	LeuZ	V4	V-region	UAA	G	G	0.000575229	8565.67	0.0767103	0.0024734	7320.33	0.0879605
EBT00001514679	LeuZ	V8	V-region	UAA	T	U	0.00138463	9277.33	0.0105233	0.00828316	8026.33	0.00864589
EBT00001514679	LeuZ	V9	V-region	UAA	T	U	0.00112231	9376	0.000497477	0.00429415	8096.33	0.00127467
EBT00001514679	LeuZ	V10	V-region	UAA	C	C	0.0021287	9380.67	0.00262262	0.00701232	8106.67	0.00250195
EBT00001514679	LeuZ	V11	V-region	UAA	G	G	0.00107504	9405.33	0.00314432	0.00231167	8127	0.00441014
EBT00001514679	LeuZ	V17	V-region	UAA	C	C	0.00497849	9435	0.000776644	0.00685935	8163	0.00187487
EBT00001514679	LeuZ	V18	V-region	UAA	G	G	0.000924412	9442.33	0.00228938	0.00334294	8178.33	0.00223668
EBT00001514679	LeuZ	V19	V-region	UAA	C	C	0.0011302	9464	0.00476725	0.0012894	8196.67	0.00146187
EBT00001514679	LeuZ	46	V-region	UAA	T	U	0.000555916	9509.33	0.000665569	0.00286271	8208.67	0.000527619
EBT00001514679	LeuZ	47	V-region	UAA	G	G	0.00290688	9515.67	0.0186325	0.00350801	8213	0.0052485
EBT00001514679	LeuZ	48	V-region	UAA	T	U	0.000916979	9696.33	0.00181868	0.00432574	8256.33	0.000726187
EBT00001514679	LeuZ	49	V-region	UAA	G	G	0.00113093	9714	0.00359011	0.00179356	8262.33	0.00124909
EBT00001514679	LeuZ	50	T-stem	UAA	C	C	0.00180263	9749	0.000546766	0.00520056	8272.67	0.000362509
EBT00001514679	LeuZ	51	T-stem	UAA	G	G	0.00111097	9754.33	0.000341612	0.00264188	8275.67	0.000523349
EBT00001514679	LeuZ	52	T-stem	UAA	G	G	0.000984413	9757.67	0.000204925	0.00320669	8280	0
EBT00001514679	LeuZ	53	T-stem	UAA	G	G	0.00109465	9759.67	0.00214709	0.00321191	8280	0.00325027
EBT00001514679	LeuZ	54	T-stem	UAA	T	T	0.000989665	9780.67	0	0.00460689	8307	0.000320911
EBT00001514679	LeuZ	55	T-loop	UAA	T	Y	0.000572633	9780.67	0	0.0018768	8309.67	0
EBT00001514679	LeuZ	56	T-loop	UAA	C	C	0.000913553	9780.67	0	0.00154157	8309.33	0
EBT00001514679	LeuZ	57	T-loop	UAA	A	A	0.000516531	9780.67	0	0.00124576	8309.33	4.0114e-05
EBT00001514679	LeuZ	58	T-loop	UAA	A	A	0.000269907	9780.67	0	0.000979219	8309.67	0
EBT00001514679	LeuZ	59	T-loop	UAA	G	G	0.00136885	9780.33	3.41e-05	0.00357037	8309.67	0
EBT00001514679	LeuZ	60	T-loop	UAA	T	U	0.00106223	9780.67	0	0.00352754	8309.67	0
EBT00001514679	LeuZ	61	T-loop	UAA	C	C	0.000593918	9779	0.000102249	0.00258172	8307.33	0.000280798
EBT00001514679	LeuZ	62	T-stem	UAA	C	C	0.00184254	9780	0	0.00802831	8309.67	0
EBT00001514679	LeuZ	63	T-stem	UAA	C	C	0.000961778	9777.33	0	0.00376783	8307.33	0
EBT00001514679	LeuZ	64	T-stem	UAA	G	G	0.00180888	9775.33	0.000545294	0.00307191	8307.33	0.000280798
EBT00001514679	LeuZ	65	T-stem	UAA	C	C	0.000956471	9780.67	0	0.00169249	8309.67	0
EBT00001514679	LeuZ	66	T-stem	UAA	T	U	0.00116666	9780.33	0	0.00397172	8309	4.01155e-05
EBT00001514679	LeuZ	67	Acc-stem	UAA	C	C	0.00161019	9779.67	0.000102243	0.00264057	8309.33	4.0114e-05
EBT00001514679	LeuZ	68	Acc-stem	UAA	C	C	0.00229485	9780.67	0	0.00473652	8309.67	0
EBT00001514679	LeuZ	69	Acc-stem	UAA	G	G	0.00340146	9777.67	0.000306728	0.00775741	8307.33	0.000280798
EBT00001514679	LeuZ	70	Acc-stem	UAA	G	G	0.0021182	9780.67	0	0.0070045	8309.67	0
EBT00001514679	LeuZ	71	Acc-stem	UAA	G	G	0.00173232	9780.67	0	0.00654574	8309.67	0
EBT00001514679	LeuZ	72	Acc-stem	UAA	T	U	0.00120769	9780	3.41e-05	0.00689155	8306.67	0.000320924
EBT00001514679	LeuZ	73		UAA	A	A	0.000557551	9780.33	3.41e-05	0.00215745	8309.33	0
EBT00001514679	LeuZ	74		UAA	C	C	0.000242291	9780.67	0	0.00156229	8308.67	0
EBT00001514679	LeuZ	75		UAA	C	C	0	9780.33	3.41e-05	0	8308.33	0.000160456
EBT00001514679	LeuZ	76		UAA	A	A	0	9780.67	0	0	8309.67	0
EBT00001514641	TrpT	1	Acc-stem	CCA	A	A	0	185.667	0.0088968	0	499.667	0.00133245
EBT00001514641	TrpT	2	Acc-stem	CCA	G	G	0	187.333	0.0035461	0	500.333	0.000665779
EBT00001514641	TrpT	3	Acc-stem	CCA	G	G	0	188	0.00176991	0	500.667	0
EBT00001514641	TrpT	4	Acc-stem	CCA	G	G	0.00179211	188.333	0	0	500.667	0
EBT00001514641	TrpT	5	Acc-stem	CCA	G	G	0.00209644	188.333	0	0	500.667	0
EBT00001514641	TrpT	6	Acc-stem	CCA	C	C	0.0030303	188.333	0	0	500.667	0
EBT00001514641	TrpT	7	Acc-stem	CCA	G	G	0	188.333	0.00702988	0.0188763	500.667	0.0144357
EBT00001514641	TrpT	8		CCA	T	s4U	0.138597	189.667	0.00350263	0.0849592	508	0
EBT00001514641	TrpT	9		CCA	A	A	0	190.333	0.0034904	0	508	0
EBT00001514641	TrpT	10	D-stem	CCA	G	G	0.00356481	191	0.0103627	0.00129424	508	0
EBT00001514641	TrpT	11	D-stem	CCA	T	U	0.00175439	193	0	0.00584434	508	0
EBT00001514641	TrpT	12	D-stem	CCA	T	U	0	193	0	0.00524455	508	0
EBT00001514641	TrpT	13	D-stem	CCA	C	C	0.00175439	193	0.0169779	0.00358519	508	0.0078125
EBT00001514641	TrpT	14	D-loop	CCA	A	A	0	196.333	0.0134003	0	512	0
EBT00001514641	TrpT	15	D-loop	CCA	A	A	0	199	0.0180921	0.00272567	512	0.0241423
EBT00001514641	TrpT	16	D-loop	CCA	T	DD	0	202.667	0	0.00269906	524.667	0
EBT00001514641	TrpT	17	D-loop	CCA	T	DD	0	202.667	0.00327869	0.00326022	524.667	0.0094399
EBT00001514641	TrpT	18	D-loop	CCA	G	G	0.00331041	203.333	0.00489396	0.0018735	529.667	0.0118159
EBT00001514641	TrpT	19	D-loop	CCA	G	G	0	204.333	0.00969305	0.00262989	536	0
EBT00001514641	TrpT	20	D-loop	CCA	T	D	0.00274348	206.333	0.00322061	0.00375222	536	0
EBT00001514641	TrpT	21	D-loop	CCA	A	A	0	207	0.00321027	0.00122123	536	0
EBT00001514641	TrpT	22	D-stem	CCA	G	G	0	207.667	0	0	536	0
EBT00001514641	TrpT	23	D-stem	CCA	A	A	0	207.667	0	0.00121605	536	0
EBT00001514641	TrpT	24	D-stem	CCA	G	G	0	207.667	0	0.000561167	536	0
EBT00001514641	TrpT	25	D-stem	CCA	C	C	0.00136612	207.667	0.00637959	0.00234357	536	0
EBT00001514641	TrpT	26		CCA	A	A	0	209	0.00159236	0.0017824	536	0
EBT00001514641	TrpT	27	Ac-Stem	CCA	C	C	0	209.333	0.0031746	0.000660066	536	0
EBT00001514641	TrpT	28	Ac-Stem	CCA	C	C	0.00134953	210	0	0.00253099	536	0
EBT00001514641	TrpT	29	Ac-Stem	CCA	G	G	0	210	0.00158479	0.00318068	536	0
EBT00001514641	TrpT	30	Ac-Stem	CCA	G	G	0.0018018	210.333	0.00315956	0.0018813	536	0.0104615
EBT00001514641	TrpT	31	Ac-Stem	CCA	T	U	0.00313513	211	0	0.0049579	541.667	0
EBT00001514641	TrpT	32	Ac-loop	CCA	C	Cm	0.00687794	210.667	0.0140406	0.00297695	541.667	0
EBT00001514641	TrpT	33	Ac-loop	CCA	T	U	0.0033841	213.667	0	0.00253954	536	0
EBT00001514641	TrpT	34	Ac-loop	CCA	C	C	0.0030958	211.333	0.147849	0.000695894	533.667	0.0970107
EBT00001514641	TrpT	35	Ac-loop	CCA	C	C	0	248	0.525813	0.00669042	591	0.14513
EBT00001514641	TrpT	36	Ac-loop	CCA	A	A	0.00258065	523	0.603287	0.00828307	691.333	0.392857
EBT00001514641	TrpT	37	Ac-loop	CCA	A	ms2i6A	0.013758	1318.33	0.670059	0.00531237	1138.67	0.470141
EBT00001514641	TrpT	38	Ac-loop	CCA	A	A	0.0097479	3995.67	0.333018	0.0291709	2149	0.383298
EBT00001514641	TrpT	39	Ac-stem	CCA	A	A	0.00235819	5990.67	0.0413399	0.00817015	3484.67	0.0630937
EBT00001514641	TrpT	40	Ac-stem	CCA	C	C	0.000739188	6249	0.0104513	0.000843459	3719.33	0.0153547
EBT00001514641	TrpT	41	Ac-stem	CCA	C	C	0.00142436	6315	0.0024222	0.0036124	3777.33	0.0015859
EBT00001514641	TrpT	42	Ac-stem	CCA	G	G	0.00240993	6330.33	0.00152471	0.0020219	3783.33	0.000352299
EBT00001514641	TrpT	43	Ac-stem	CCA	G	G	0.000991761	6340	0.00162721	0.00161468	3784.67	0.00237237
EBT00001514641	TrpT	44	V-region	CCA	G	G	0.00206351	6350.33	0.00662217	0.00112259	3793.67	0.00749978
EBT00001514641	TrpT	45	V-region	CCA	T	U	0.00110292	6392.67	0.00171777	0.00561039	3822.33	0.00260938
EBT00001514641	TrpT	46	V-region	CCA	G	m7G	0.00196517	6403.67	0.0110676	0.00324127	3832.33	0.0109257
EBT00001514641	TrpT	47	V-region	CCA	T	U	0.00137653	6475.33	0.000668759	0.00553674	3874.67	0.00197476
EBT00001514641	TrpT	48	V-region	CCA	T	U	0.00181866	6479.67	0.00107914	0.0078863	3882.33	0
EBT00001514641	TrpT	49	T-stem	CCA	G	G	0.00157118	6486.67	0.00107797	0.00609435	3880.67	0.000772466
EBT00001514641	TrpT	50	T-stem	CCA	G	G	0.000954031	6493.67	0.000666872	0.00257374	3883.67	0
EBT00001514641	TrpT	51	T-stem	CCA	G	G	0.00100579	6498	0.00112728	0.00179272	3883.67	0
EBT00001514641	TrpT	52	T-stem	CCA	A	A	0.000338329	6505.33	0.000153696	0.00106353	3883.67	8.58221e-05
EBT00001514641	TrpT	53	T-stem	CCA	G	G	0.000196524	6506.33	0.00280985	0.00153557	3884	0.00614125
EBT00001514641	TrpT	54	T-loop	CCA	T	T	0.00043527	6524.67	0	0.00267506	3908	0
EBT00001514641	TrpT	55	T-loop	CCA	T	Y	0.000138735	6524.67	0	0.00122785	3908	0
EBT00001514641	TrpT	56	T-loop	CCA	C	C	0.000174195	6524.67	0	0.000777958	3908	0
EBT00001514641	TrpT	57	T-loop	CCA	G	G	0	6524.67	0	0.000424781	3908	0
EBT00001514641	TrpT	58	T-loop	CCA	A	A	0.000239359	6524.67	0	0.000399675	3908	0
EBT00001514641	TrpT	59	T-loop	CCA	G	G	0.000563366	6524.67	0	0.000710147	3908	0
EBT00001514641	TrpT	60	T-loop	CCA	T	U	0.000902911	6524.67	0	0.00334614	3908	0
EBT00001514641	TrpT	61	T-stem	CCA	C	C	0.00143882	6524.67	0	0.00134034	3908	0
EBT00001514641	TrpT	62	T-stem	CCA	T	U	0.000848868	6524.33	5.11e-05	0.00280144	3908	0
EBT00001514641	TrpT	63	T-stem	CCA	C	C	0.000889604	6524.67	0	0.00343801	3908	0
EBT00001514641	TrpT	64	T-stem	CCA	T	U	0.00134153	6523.67	0	0.00318352	3908	0
EBT00001514641	TrpT	65	T-stem	CCA	C	C	0.00320271	6523.33	5.11e-05	0.00466691	3907.67	8.5295e-05
EBT00001514641	TrpT	66	Acc-stem	CCA	C	C	0.00179012	6523.67	0	0.00592457	3908	0
EBT00001514641	TrpT	67	Acc-stem	CCA	G	G	0.00170464	6521	0.000408768	0.00502311	3908	0
EBT00001514641	TrpT	68	Acc-stem	CCA	C	C	0.00179013	6523.67	0.000153265	0.00303437	3907.33	8.53026e-05
EBT00001514641	TrpT	69	Acc-stem	CCA	C	C	0.00233152	6524.67	0	0.00320895	3907.67	8.5295e-05
EBT00001514641	TrpT	70	Acc-stem	CCA	C	C	0.00229605	6524.67	0	0.00760328	3908	0
EBT00001514641	TrpT	71	Acc-stem	CCA	C	C	0.00144191	6524.67	0	0.00335449	3908	0
EBT00001514641	TrpT	72	Acc-stem	CCA	T	U	0.00259005	6524.33	5.11e-05	0.0103528	3908	0
EBT00001514641	TrpT	73		CCA	G	G	0.00206201	6524.67	0	0.00637053	3907.33	8.53026e-05
EBT00001514641	TrpT	74		CCA	C	C	0.000538646	6524.33	5.11e-05	0.00187965	3907.67	8.5295e-05
EBT00001514641	TrpT	75		CCA	C	C	0	6524.67	0	0	3908	0
EBT00001514641	TrpT	76		CCA	A	A	0	6203.67	0	0	3401.33	0
EBT00001514638	CysT	1	Acc-stem	GCA	G	G	0	354.333	0.0756522	0	279	0.0199063
EBT00001514638	CysT	2	Acc-stem	GCA	G	G	0	383.333	0.010327	0	284.667	0.00116959
EBT00001514638	CysT	3	Acc-stem	GCA	C	C	0	387.333	0.00343053	0	285	0
EBT00001514638	CysT	4	Acc-stem	GCA	G	G	0.00176971	388.667	0	0.00238143	285	0
EBT00001514638	CysT	5	Acc-stem	GCA	C	C	0.000694444	388.667	0	0.00100402	285	0.0261959
EBT00001514638	CysT	6	Acc-stem	GCA	G	G	0.000694444	388.667	0.0118644	0.0130522	292.667	0
EBT00001514638	CysT	7	Acc-stem	GCA	T	U	0	393.333	0.00673401	0.00338544	292.667	0
EBT00001514638	CysT	8		GCA	T	s4U	0.170875	396	0.046549	0.0930847	292.667	0.0892116
EBT00001514638	CysT	9		GCA	A	A	0	415.333	0.00875099	0	321.333	0
EBT00001514638	CysT	10	D-stem	GCA	A	A	0.00081103	419	0.000794912	0.00219298	321.333	0
EBT00001514638	CysT	11	D-stem	GCA	C	C	0.00331219	419.333	0.0133333	0.00206963	321.333	0.040796
EBT00001514638	CysT	12	D-stem	GCA	A	A	0.00063857	425	0.00468384	0.00109649	335	0
EBT00001514638	CysT	13	D-stem	GCA	A	A	0	427	0.00388802	0	335	0
EBT00001514638	CysT	14	D-loop	GCA	A	A	0	428.667	0.000777001	0.000874891	335	0.0195122
EBT00001514638	CysT	15	D-loop	GCA	G	G	0.00142188	429	0.00540958	0.00296941	341.667	0
EBT00001514638	CysT	16	D-loop	GCA	C	C	0	431.333	0.000772201	0.00620406	341.667	0
EBT00001514638	CysT	18	D-loop	GCA	G	G	0.000789889	431.667	0.000771605	0.00104167	341.667	0.0321058
EBT00001514638	CysT	19	D-loop	GCA	G	G	0.00124378	432	0.0795455	0.000807103	353	0.0964164
EBT00001514638	CysT	20	D-loop	GCA	T	DD	0	469.333	0.030303	0.00473899	390.667	0.00677966
EBT00001514638	CysT	21	D-loop	GCA	T	DD	0.000573723	484	0.0129164	0.00422343	393.333	0.00589722
EBT00001514638	CysT	22	D-stem	GCA	A	A	0	490.333	0.0173681	0.0134467	395.667	0.0310204
EBT00001514638	CysT	23	D-stem	GCA	T	U	0.000556483	499	0.00133422	0.00317261	408.333	0.0160643
EBT00001514638	CysT	24	D-stem	GCA	G	G	0.00840688	499.667	0.0470439	0.000913242	415	0.0333851
EBT00001514638	CysT	25	D-stem	GCA	T	U	0	524.333	0.00190355	0.00329209	429.333	0.000775795
EBT00001514638	CysT	26		GCA	A	A	0.000620732	525.333	0.00693132	0	429.667	0
EBT00001514638	CysT	27	Ac-Stem	GCA	G	G	0.000617284	529	0.00874453	0.000609385	429.667	0.0167811
EBT00001514638	CysT	28	Ac-Stem	GCA	C	C	0.0010433	533.667	0.00124766	0.000597372	437	0
EBT00001514638	CysT	29	Ac-Stem	GCA	G	G	0.00165268	534.333	0.00496586	0.00205385	437	0
EBT00001514638	CysT	30	Ac-Stem	GCA	G	G	0.00112498	537	0.0259976	0	437	0.00304183
EBT00001514638	CysT	31	Ac-Stem	GCA	A	A	0	551.333	0.0477835	0.000903342	438.333	0
EBT00001514638	CysT	32	Ac-loop	GCA	T	Y	0.00240413	579	0.0230596	0.00351033	438.333	0
EBT00001514638	CysT	33	Ac-loop	GCA	T	U	0.00191744	592.667	0.0078125	0.00238949	438.333	0.00529501
EBT00001514638	CysT	34	Ac-loop	GCA	G	G	0.00343933	597.333	0.172669	0.00479331	440.667	0.118079
EBT00001514638	CysT	35	Ac-loop	GCA	C	C	0.000932362	722	0.373445	0.00316642	499.667	0.213536
EBT00001514638	CysT	36	Ac-loop	GCA	A	A	0.000316857	1152.33	0.277383	0.000626566	635.333	0.198149
EBT00001514638	CysT	37	Ac-loop	GCA	A	ms2i6A	0.0110975	1594.67	0.697234	0.00534135	792.333	0.54568
EBT00001514638	CysT	38	Ac-loop	GCA	A	A	0.0171526	5267	0.4618	0.0297065	1744	0.402535
EBT00001514638	CysT	39	Ac-stem	GCA	T	Y	0.000448781	9786.33	0.00713561	0.00113312	2919	0.0134069
EBT00001514638	CysT	40	Ac-stem	GCA	C	C	0.000689962	9856.67	0.00514753	0.000886651	2958.67	0.0179243
EBT00001514638	CysT	41	Ac-stem	GCA	C	C	0.00127746	9907.67	0.00107545	0.00402403	3012.67	0.00132597
EBT00001514638	CysT	42	Ac-stem	GCA	G	G	0.00389666	9918.33	0.00991582	0.0135259	3016.67	0.0260439
EBT00001514638	CysT	43	Ac-stem	GCA	T	U	0.000534629	10017.7	0.00093082	0.0035559	3097.33	0.00268327
EBT00001514638	CysT	44	V-region	GCA	C	C	0.00127848	10027	0.0229952	0.000664807	3105.67	0.0275545
EBT00001514638	CysT	45	V-region	GCA	T	U	0.000583426	10263	0.00152419	0.00307525	3193.67	0
EBT00001514638	CysT	46	V-region	GCA	A	A	0.000216295	10278.7	0.00132785	0.000407458	3193.67	0.000938478
EBT00001514638	CysT	48	V-region	GCA	G	G	0.00160385	10292.3	0.00525129	0.0014141	3196.67	0.00570244
EBT00001514638	CysT	49	T-stem	GCA	T	U	0.00178184	10346.7	0.000289864	0.00488629	3215	0
EBT00001514638	CysT	50	T-stem	GCA	C	C	0.00137618	10349.7	0.000418517	0.00256661	3215	0
EBT00001514638	CysT	51	T-stem	GCA	C	C	0.00151539	10354	0.000225305	0.00399674	3215	0
EBT00001514638	CysT	52	T-stem	GCA	G	G	0.00102104	10356.3	0.000225255	0.00211813	3215	0
EBT00001514638	CysT	53	T-stem	GCA	G	G	0.000577601	10358.7	0.00125341	0.00320458	3215	0.00464396
EBT00001514638	CysT	54	T-loop	GCA	T	T	0.00138192	10371.7	3.21e-05	0.00438094	3230	0.000103188
EBT00001514638	CysT	55	T-loop	GCA	T	Y	0.00035848	10372	0	0.00134379	3230.33	0
EBT00001514638	CysT	56	T-loop	GCA	C	C	0.000172634	10372	0	0.000511717	3230.33	0
EBT00001514638	CysT	57	T-loop	GCA	G	G	0.000292927	10372	0	0.000128999	3230.33	0
EBT00001514638	CysT	58	T-loop	GCA	A	A	0	10372	0	8.23e-05	3230.33	0
EBT00001514638	CysT	59	T-loop	GCA	C	C	0.000255758	10372	0	0	3230.33	0
EBT00001514638	CysT	60	T-loop	GCA	T	U	0.000521804	10371.7	3.21e-05	0.00107893	3230.33	0
EBT00001514638	CysT	61	T-stem	GCA	C	C	0.00112635	10372	0	0.00185551	3230.33	0
EBT00001514638	CysT	62	T-stem	GCA	C	C	0.00128942	10372	0	0.00226693	3230.33	0
EBT00001514638	CysT	63	T-stem	GCA	G	G	0.00140077	10370.7	0.000128551	0.00191802	3230	0.000103188
EBT00001514638	CysT	64	T-stem	GCA	G	G	0.00241464	10372	0	0.00129021	3230.33	0
EBT00001514638	CysT	65	T-stem	GCA	A	A	0.000637241	10371.3	6.43e-05	0.00091436	3230.33	0
EBT00001514638	CysT	66	Acc-stem	GCA	A	A	0.00092115	10372	0	0.00476057	3230.33	0
EBT00001514638	CysT	67	Acc-stem	GCA	C	C	0.00132173	10371.7	0	0.00148585	3230.33	0
EBT00001514638	CysT	68	Acc-stem	GCA	G	G	0.0018101	10371.7	3.21e-05	0.00350402	3230.33	0
EBT00001514638	CysT	69	Acc-stem	GCA	C	C	0.00154955	10372	0	0.00385071	3230.33	0
EBT00001514638	CysT	70	Acc-stem	GCA	G	G	0.00145579	10372	0	0.0028637	3230	0.000103188
EBT00001514638	CysT	71	Acc-stem	GCA	C	C	0.0013955	10372	0	0.001782	3230.33	0
EBT00001514638	CysT	72	Acc-stem	GCA	C	C	0.000954431	10372	0	0.0023384	3230	0.000103188
EBT00001514638	CysT	73		GCA	T	U	0.00116741	10372	0	0.00253799	3230.33	0
EBT00001514638	CysT	74		GCA	C	C	0.000144018	10371.7	0	0.000449477	3229.67	0
EBT00001514638	CysT	75		GCA	C	C	0	10371.7	0	0	3229.33	0
EBT00001514638	CysT	76		GCA	A	A	0	9813.33	0	0	2808	0
EBT00001514743	SelC	1	Acc-stem	UCA	G	G	NA	19	NA	NA	0	NA
EBT00001514743	SelC	2	Acc-stem	UCA	G	G	NA	20	NA	NA	0	NA
EBT00001514743	SelC	3	Acc-stem	UCA	A	A	NA	20.6667	NA	NA	0	NA
EBT00001514743	SelC	4	Acc-stem	UCA	A	A	NA	20.6667	NA	NA	0	NA
EBT00001514743	SelC	5	Acc-stem	UCA	G	G	NA	20.6667	NA	NA	0	NA
EBT00001514743	SelC	5a	Acc-stem	UCA	A	A	NA	20.6667	NA	NA	0	NA
EBT00001514743	SelC	6	Acc-stem	UCA	T	T	NA	20.6667	NA	NA	0	NA
EBT00001514743	SelC	7	Acc-stem	UCA	C	C	NA	20.6667	NA	NA	0	NA
EBT00001514743	SelC	8		UCA	G	G	NA	20.6667	NA	NA	0	NA
EBT00001514743	SelC	9		UCA	T	s4U	NA	20.6667	NA	NA	0	NA
EBT00001514743	SelC	10	D-stem	UCA	C	C	NA	20.6667	NA	NA	0	NA
EBT00001514743	SelC	11	D-stem	UCA	G	G	NA	20.6667	NA	NA	0	NA
EBT00001514743	SelC	12	D-stem	UCA	T	T	NA	20.6667	NA	NA	0	NA
EBT00001514743	SelC	13	D-stem	UCA	C	C	NA	20.6667	NA	NA	0	NA
EBT00001514743	SelC	14	D-stem	UCA	T	T	NA	21	NA	NA	0	NA
EBT00001514743	SelC	15	D-stem	UCA	C	C	NA	21	NA	NA	0	NA
EBT00001514743	SelC	17	D-Loop	UCA	C	C	NA	21	NA	NA	0	NA
EBT00001514743	SelC	18	D-Loop	UCA	G	G	NA	21	NA	NA	0	NA
EBT00001514743	SelC	19	D-Loop	UCA	G	G	NA	21	NA	NA	0	NA
EBT00001514743	SelC	20	D-Loop	UCA	T	D	NA	21	NA	NA	0	NA
EBT00001514743	SelC	20a	D-stem	UCA	G	G	NA	21	NA	NA	0	NA
EBT00001514743	SelC	21	D-stem	UCA	A	A	NA	21	NA	NA	0	NA
EBT00001514743	SelC	22	D-stem	UCA	G	G	NA	21	NA	NA	0	NA
EBT00001514743	SelC	23	D-stem	UCA	G	G	NA	21	NA	NA	0	NA
EBT00001514743	SelC	24	D-stem	UCA	C	C	NA	21	NA	NA	0	NA
EBT00001514743	SelC	25	D-stem	UCA	G	G	NA	21	NA	NA	0	NA
EBT00001514743	SelC	26		UCA	G	G	NA	21	NA	NA	0	NA
EBT00001514743	SelC	27	Acc-stem	UCA	C	C	NA	21	NA	NA	0	NA
EBT00001514743	SelC	28	Acc-stem	UCA	T	T	NA	21	NA	NA	0	NA
EBT00001514743	SelC	29	Acc-stem	UCA	G	G	NA	21	NA	NA	0	NA
EBT00001514743	SelC	30	Acc-stem	UCA	G	G	NA	21	NA	NA	0	NA
EBT00001514743	SelC	31	Acc-stem	UCA	A	A	NA	21	NA	NA	0	NA
EBT00001514743	SelC	32	Acc-loop	UCA	C	C	NA	21	NA	NA	0	NA
EBT00001514743	SelC	33	Acc-loop	UCA	T	T	NA	21.6667	NA	NA	0	NA
EBT00001514743	SelC	34	Acc-loop	UCA	T	T	NA	21.6667	NA	NA	0	NA
EBT00001514743	SelC	35	Acc-loop	UCA	C	C	NA	21.6667	NA	NA	0	NA
EBT00001514743	SelC	36	Acc-loop	UCA	A	A	NA	22.3333	NA	NA	0	NA
EBT00001514743	SelC	37	Acc-loop	UCA	A	i6A	NA	23.6667	NA	NA	0	NA
EBT00001514743	SelC	38	Acc-loop	UCA	A	A	NA	28.3333	NA	NA	0	NA
EBT00001514743	SelC	39	Acc-stem	UCA	T	T	NA	31.3333	NA	NA	0	NA
EBT00001514743	SelC	40	Acc-stem	UCA	C	C	NA	31.3333	NA	NA	0	NA
EBT00001514743	SelC	41	Acc-stem	UCA	C	C	NA	31.3333	NA	NA	0	NA
EBT00001514743	SelC	42	Acc-stem	UCA	A	A	NA	31.3333	NA	NA	0	NA
EBT00001514743	SelC	43	Acc-stem	UCA	G	G	NA	31.3333	NA	NA	0	NA
EBT00001514743	SelC	44	V-region	UCA	T	T	NA	33.3333	NA	NA	0	NA
EBT00001514743	SelC	V1	V-region	UCA	T	T	NA	33.3333	NA	NA	0	NA
EBT00001514743	SelC	V2	V-region	UCA	G	G	NA	33.3333	NA	NA	0	NA
EBT00001514743	SelC	V3	V-region	UCA	G	G	NA	33.3333	NA	NA	0	NA
EBT00001514743	SelC	V4	V-region	UCA	G	G	NA	33.6667	NA	NA	0	NA
EBT00001514743	SelC	V5	V-region	UCA	G	G	NA	33.6667	NA	NA	0	NA
EBT00001514743	SelC	V6	V-region	UCA	C	C	NA	36	NA	NA	0	NA
EBT00001514743	SelC	V7	V-region	UCA	C	C	NA	36.3333	NA	NA	0	NA
EBT00001514743	SelC	V8	V-region	UCA	G	G	NA	37.6667	NA	NA	0	NA
EBT00001514743	SelC	V9	V-region	UCA	C	C	NA	62	NA	NA	22.6667	NA
EBT00001514743	SelC	V10	V-region	UCA	C	C	0	395.333	0.019024	0	146	0
EBT00001514743	SelC	V11	V-region	UCA	A	A	0	403	0.00165153	0	146	0
EBT00001514743	SelC	V12	V-region	UCA	G	G	0	403.667	0.00574713	0	146	0
EBT00001514743	SelC	V13	V-region	UCA	C	C	0.000861326	406	0	0.0145985	146	0
EBT00001514743	SelC	V14	V-region	UCA	G	G	0.0032378	406	0.002457	0	146	0
EBT00001514743	SelC	V15	V-region	UCA	G	G	0	407	0.00326531	0.00443208	146	0
EBT00001514743	SelC	V16	V-region	UCA	T	T	0.00161155	408.333	0	0.00443208	146	0
EBT00001514743	SelC	V17	V-region	UCA	C	C	0.00245928	408	0.000816326	0.00470066	146	0
EBT00001514743	SelC	V18	V-region	UCA	C	C	0	408.333	0.000815661	0.00453515	146	0
EBT00001514743	SelC	V19	V-region	UCA	C	C	0.00236179	408.667	0.000814996	0.00680272	146	0
EBT00001514743	SelC	V20	V-region	UCA	G	G	0.00245367	409	0	0.00226757	146	0
EBT00001514743	SelC	48	V-region	UCA	G	G	0.000856898	409	0.000814332	0.004329	146	0
EBT00001514743	SelC	49	T-stem	UCA	G	G	0.00245147	409.333	0	0.00226757	146	0
EBT00001514743	SelC	50	T-stem	UCA	C	C	0.00725915	409.333	0.00081367	0.0121654	146	0
EBT00001514743	SelC	51	T-stem	UCA	A	A	0	409.667	0	0	146	0
EBT00001514743	SelC	52	T-stem	UCA	G	G	0.0025641	409.667	0	0	146	0
EBT00001514743	SelC	53	T-stem	UCA	G	G	0	409.667	0.0016247	0.0021645	146	0.0112867
EBT00001514743	SelC	54	T-loop	UCA	T	T	0.00330493	410.333	0	0.00904707	147.667	0
EBT00001514743	SelC	55	T-loop	UCA	T	Y	0	410.333	0	0.00688257	147.667	0
EBT00001514743	SelC	56	T-loop	UCA	C	C	0	410.333	0	0	147.667	0
EBT00001514743	SelC	57	T-loop	UCA	G	G	0	410.333	0	0	147.667	0
EBT00001514743	SelC	58	T-loop	UCA	A	A	0.000747384	410.333	0	0.00234742	147.667	0
EBT00001514743	SelC	59	T-loop	UCA	C	C	0.0015999	410.333	0	0	147.667	0
EBT00001514743	SelC	60	T-loop	UCA	T	T	0.000747384	410.333	0	0	147.667	0
EBT00001514743	SelC	61	T-stem	UCA	C	C	0.000852515	410.333	0	0	147.667	0
EBT00001514743	SelC	62	T-stem	UCA	C	C	0.00244592	410.333	0	0	147.667	0
EBT00001514743	SelC	63	T-stem	UCA	T	T	0.000852515	410.333	0	0.00696241	147.333	0
EBT00001514743	SelC	64	T-stem	UCA	G	G	0.000846024	410.333	0	0.00217865	147.333	0.00225734
EBT00001514743	SelC	65	T-stem	UCA	T	T	0.00648525	410.333	0	0.00912691	147.667	0
EBT00001514743	SelC	66	Acc-stem	UCA	G	G	0.00170503	410.333	0	0.00443208	147.667	0
EBT00001514743	SelC	67	Acc-stem	UCA	A	A	0	410.333	0	0.0021645	147.667	0
EBT00001514743	SelC	67a	Acc-stem	UCA	T	T	0	410.333	0	0.00453515	147.667	0
EBT00001514743	SelC	68	Acc-stem	UCA	C	C	0.00424959	410.333	0	0.00234742	147.667	0
EBT00001514743	SelC	69	Acc-stem	UCA	T	T	0	410.333	0	0.00677949	147.667	0
EBT00001514743	SelC	70	Acc-stem	UCA	T	T	0	410.333	0	0.0021645	147.667	0
EBT00001514743	SelC	71	Acc-stem	UCA	C	C	0.00169854	410.333	0	0.00443208	147.667	0
EBT00001514743	SelC	72	Acc-stem	UCA	C	C	0.00234728	410.333	0	0	147.667	0
EBT00001514743	SelC	73		UCA	G	G	0.00159341	410.333	0	0.00677949	147.667	0
EBT00001514743	SelC	74		UCA	C	C	0.000747384	410.333	0	0.00226757	147.667	0
EBT00001514743	SelC	75		UCA	C	C	0	410.333	0	0	147.667	0
EBT00001514743	SelC	76		UCA	A	A	0	356	0	0	118.667	0
EBT00001514584	SerU	1	Acc-stem	CGA	G	G	NA	14.3333	NA	NA	14	NA
EBT00001514584	SerU	2	Acc-stem	CGA	G	G	NA	15	NA	NA	14	NA
EBT00001514584	SerU	3	Acc-stem	CGA	A	A	NA	15	NA	NA	14.3333	NA
EBT00001514584	SerU	4	Acc-stem	CGA	G	G	NA	15	NA	NA	14.3333	NA
EBT00001514584	SerU	5	Acc-stem	CGA	A	A	NA	15	NA	NA	14.3333	NA
EBT00001514584	SerU	6	Acc-stem	CGA	G	G	NA	15	NA	NA	14.3333	NA
EBT00001514584	SerU	7	Acc-stem	CGA	A	A	NA	15.3333	NA	NA	14.3333	NA
EBT00001514584	SerU	8		CGA	T	U	NA	15.3333	NA	NA	14.3333	NA
EBT00001514584	SerU	9		CGA	G	G	NA	15.6667	NA	NA	14.3333	NA
EBT00001514584	SerU	10	D-stem	CGA	C	C	NA	16.3333	NA	NA	14.3333	NA
EBT00001514584	SerU	11	D-stem	CGA	C	C	NA	16.3333	NA	NA	14.3333	NA
EBT00001514584	SerU	12	D-stem	CGA	G	G	NA	16.3333	NA	NA	14.3333	NA
EBT00001514584	SerU	13	D-stem	CGA	G	G	NA	16.3333	NA	NA	14.3333	NA
EBT00001514584	SerU	14	D-loop	CGA	A	A	NA	16.3333	NA	NA	14.3333	NA
EBT00001514584	SerU	15	D-loop	CGA	G	G	NA	16.3333	NA	NA	14.3333	NA
EBT00001514584	SerU	16	D-loop	CGA	C	C	NA	17	NA	NA	14.3333	NA
EBT00001514584	SerU	18	D-loop	CGA	G	Gm	NA	17	NA	NA	14.3333	NA
EBT00001514584	SerU	19	D-loop	CGA	G	G	NA	17	NA	NA	14.3333	NA
EBT00001514584	SerU	20	D-loop	CGA	C	C	NA	17	NA	NA	14.3333	NA
EBT00001514584	SerU	20a	D-loop	CGA	T	D	NA	17	NA	NA	14.3333	NA
EBT00001514584	SerU	20b	D-loop	CGA	G	G	NA	17	NA	NA	14.3333	NA
EBT00001514584	SerU	21	D-loop	CGA	A	A	NA	17	NA	NA	14.3333	NA
EBT00001514584	SerU	22	D-stem	CGA	A	A	NA	17	NA	NA	14.3333	NA
EBT00001514584	SerU	23	D-stem	CGA	C	C	NA	17	NA	NA	14.3333	NA
EBT00001514584	SerU	24	D-stem	CGA	G	G	NA	17	NA	NA	14.3333	NA
EBT00001514584	SerU	25	D-stem	CGA	G	G	NA	17	NA	NA	14.3333	NA
EBT00001514584	SerU	26		CGA	A	A	NA	17	NA	NA	14.3333	NA
EBT00001514584	SerU	27	Ac-Stem	CGA	C	C	NA	17	NA	NA	14.3333	NA
EBT00001514584	SerU	28	Ac-Stem	CGA	C	C	NA	17	NA	NA	14.3333	NA
EBT00001514584	SerU	29	Ac-Stem	CGA	G	G	NA	17	NA	NA	14.3333	NA
EBT00001514584	SerU	30	Ac-Stem	CGA	G	G	NA	17.3333	NA	NA	14.3333	NA
EBT00001514584	SerU	31	Ac-Stem	CGA	T	U	NA	17.3333	NA	NA	14.3333	NA
EBT00001514584	SerU	32	Ac-loop	CGA	C	C	NA	17.3333	NA	NA	14.3333	NA
EBT00001514584	SerU	33	Ac-loop	CGA	T	U	NA	17.3333	NA	NA	14.3333	NA
EBT00001514584	SerU	34	Ac-loop	CGA	C	C	NA	17.3333	NA	NA	14.3333	NA
EBT00001514584	SerU	35	Ac-loop	CGA	G	G	NA	19.3333	NA	NA	14.6667	NA
EBT00001514584	SerU	36	Ac-loop	CGA	A	A	NA	31	NA	NA	17.3333	NA
EBT00001514584	SerU	37	Ac-loop	CGA	A	ms2i6A	NA	45	NA	NA	17.3333	NA
EBT00001514584	SerU	38	Ac-loop	CGA	A	A	0.00918174	169.667	0.311231	NA	30.6667	NA
EBT00001514584	SerU	39	Ac-stem	CGA	A	A	0.00433507	246.333	0.0561941	NA	91.6667	NA
EBT00001514584	SerU	40	Ac-stem	CGA	C	C	0.00198413	261	0.0163317	0	101.667	0
EBT00001514584	SerU	41	Ac-stem	CGA	C	C	0.000977517	265.333	0.005	0.00225225	101.667	0
EBT00001514584	SerU	42	Ac-stem	CGA	G	G	0	266.667	0.00249376	0	101.667	0
EBT00001514584	SerU	43	Ac-stem	CGA	G	G	0.00218836	267.333	0.00372671	0	101.667	0.052795
EBT00001514584	SerU	44	V-region	CGA	A	A	0	268.333	0.00617284	0	107.333	0
EBT00001514584	SerU	V1	V-region	CGA	G	G	0.00215813	270	0.0264423	0	107.333	0
EBT00001514584	SerU	V2	V-region	CGA	T	U	0.000938967	277.333	0	0.00275482	107.333	0
EBT00001514584	SerU	V3	V-region	CGA	A	A	0.00115741	277.333	0.00478469	0	107.333	0
EBT00001514584	SerU	V4	V-region	CGA	G	G	0.00176367	278.667	0.00238663	0	107.333	0
EBT00001514584	SerU	V5	V-region	CGA	G	G	0.0045399	279.333	0.00945627	0.0045045	107.333	0
EBT00001514584	SerU	V6	V-region	CGA	G	G	0.00441376	282	0.00118064	0.00500707	107.333	0
EBT00001514584	SerU	V8	V-region	CGA	G	G	0.00092081	282.333	0.007034	0.00225225	107.333	0.0212766
EBT00001514584	SerU	V9	V-region	CGA	C	C	0.00171821	284.333	0.00698487	0	109.667	0
EBT00001514584	SerU	V10	V-region	CGA	A	A	0	286.333	0.00578704	0	109.667	0
EBT00001514584	SerU	V11	V-region	CGA	A	A	0.000910747	288	0.00575374	0.00275482	109.667	0
EBT00001514584	SerU	V14	V-region	CGA	C	C	0.000903342	289.667	0.0102506	0	109.667	0.0208333
EBT00001514584	SerU	V15	V-region	CGA	T	U	0.00177305	292.667	0.00453515	0.00275482	112	0
EBT00001514584	SerU	V16	V-region	CGA	C	C	0.00111111	294	0.00338983	0.00770609	112	0
EBT00001514584	SerU	V17	V-region	CGA	T	U	0.00220751	295	0.00225479	0.00770609	112	0
EBT00001514584	SerU	V18	V-region	CGA	A	A	0.00110375	295.667	0.00560538	0	112	0
EBT00001514584	SerU	V19	V-region	CGA	C	C	0.00197271	297.333	0.016538	0.00275482	112	0
EBT00001514584	SerU	48	V-region	CGA	C	C	0.0017138	302.333	0	0.00985663	112	0
EBT00001514584	SerU	49	T-stem	CGA	G	G	0.00688063	302.333	0.00765864	0.0021645	111.333	0.00595238
EBT00001514584	SerU	50	T-stem	CGA	G	G	0.00217865	304.667	0	0.00860215	112	0
EBT00001514584	SerU	51	T-stem	CGA	G	G	0.000848176	304.667	0	0.00766018	112	0
EBT00001514584	SerU	52	T-stem	CGA	G	G	0.00372904	304.667	0	0.00490536	112	0
EBT00001514584	SerU	53	T-stem	CGA	G	G	0	304.667	0	0	112	0
EBT00001514584	SerU	54	T-loop	CGA	T	T	0.00169635	304.667	0	0.00430107	112	0
EBT00001514584	SerU	55	T-loop	CGA	T	Y	0	304.667	0	0.00490536	112	0
EBT00001514584	SerU	56	T-loop	CGA	C	C	0.00217865	304.667	0	0	112	0
EBT00001514584	SerU	57	T-loop	CGA	A	A	0.00193966	304.333	0.00109409	0.00275482	112	0
EBT00001514584	SerU	58	T-loop	CGA	A	A	0	304.667	0	0.00215054	112	0
EBT00001514584	SerU	59	T-loop	CGA	A	A	0	304.667	0	0	112	0
EBT00001514584	SerU	60	T-loop	CGA	T	U	0.00239856	304.667	0	0.00215054	112	0
EBT00001514584	SerU	61	T-stem	CGA	C	C	0.00108932	304.667	0	0.00491932	111.667	0.00297619
EBT00001514584	SerU	62	T-stem	CGA	C	C	0.00108932	304.667	0	0.00215054	112	0
EBT00001514584	SerU	63	T-stem	CGA	C	C	0.00496433	304.667	0	0.00215054	112	0
EBT00001514584	SerU	64	T-stem	CGA	C	C	0.0062948	304.667	0	0	112	0
EBT00001514584	SerU	65	T-stem	CGA	C	C	0.00239856	304.667	0	0.00490536	112	0
EBT00001514584	SerU	66	Acc-stem	CGA	T	U	0.00108932	304.667	0	0.00770609	112	0
EBT00001514584	SerU	67	Acc-stem	CGA	C	C	0.00263971	304.667	0	0	112	0
EBT00001514584	SerU	68	Acc-stem	CGA	T	U	0.00239856	304.667	0	0.00215054	112	0
EBT00001514584	SerU	69	Acc-stem	CGA	C	C	0.00155039	304.667	0	0.01382	112	0
EBT00001514584	SerU	70	Acc-stem	CGA	T	U	0.00155039	304.667	0	0.0104609	112	0
EBT00001514584	SerU	71	Acc-stem	CGA	C	C	0.00394895	304.667	0	0.00766018	112	0
EBT00001514584	SerU	72	Acc-stem	CGA	C	C	0.000848176	304.667	0	0.00920643	112	0
EBT00001514584	SerU	73		CGA	G	G	0.00603242	304.667	0	0.00770609	112	0
EBT00001514584	SerU	74		CGA	C	C	0	304.667	0	0.00555556	112	0
EBT00001514584	SerU	75		CGA	C	C	0	304.667	0	0	112	0
EBT00001514584	SerU	76		CGA	A	A	0	269	0	NA	98.6667	NA
EBT00001514678	SerW	1	Acc-stem	GGA	G	G	0	323	0.0132383	0	138.333	0
EBT00001514678	SerW	2	Acc-stem	GGA	G	G	0	327.333	0.00607287	0	138.333	0
EBT00001514678	SerW	3	Acc-stem	GGA	T	U	0	329.333	0	0.00724723	138.333	0.00479616
EBT00001514678	SerW	4	Acc-stem	GGA	G	G	0	329.333	0.0020202	0	139	0
EBT00001514678	SerW	5	Acc-stem	GGA	A	A	0.00140056	330	0.00201613	0	139	0
EBT00001514678	SerW	6	Acc-stem	GGA	G	G	0.00187106	330.667	0.00401606	0	139	0
EBT00001514678	SerW	7	Acc-stem	GGA	G	G	0.00878899	332	0.0109235	0.0218579	139	0
EBT00001514678	SerW	8		GGA	T	s4U	0.278454	335.667	0.00983284	0.309886	139	0
EBT00001514678	SerW	9		GGA	G	G	0.00137174	339	0.0221154	0	139	0.0544218
EBT00001514678	SerW	10	D-stem	GGA	T	U	0	346.667	0.000960615	0.00566319	147	0
EBT00001514678	SerW	11	D-stem	GGA	C	C	0.00130719	347	0.00667939	0.0038417	147	0
EBT00001514678	SerW	12	D-stem	GGA	C	C	0.00130719	349.333	0.000953289	0.00182149	147	0
EBT00001514678	SerW	13	D-stem	GGA	G	G	0.00113379	349.667	0	0	147	0
EBT00001514678	SerW	14	D-loop	GGA	A	A	0.00130719	349.333	0	0	147	0
EBT00001514678	SerW	15	D-loop	GGA	G	G	0.00226757	349.333	0.00851466	0.00182149	147	0.0556745
EBT00001514678	SerW	16	D-loop	GGA	T	U	0	352.333	0.00094518	0.00182149	155.667	0
EBT00001514678	SerW	18	D-loop	GGA	G	Gm	0.00196346	352.667	0.00188679	0.00182149	155.667	0
EBT00001514678	SerW	19	D-loop	GGA	G	G	0	353.333	0.0501792	0.0034904	155.667	0
EBT00001514678	SerW	20	D-loop	GGA	C	DD	0.00368153	372	0.0295652	0.218332	155.667	0
EBT00001514678	SerW	20a	D-loop	GGA	T	DD	0.00164249	383.333	0	0.00356669	155.667	0.00638298
EBT00001514678	SerW	20b	D-loop	GGA	G	G	0.00298298	383.333	0.0245971	0.00364299	156.667	0.0208333
EBT00001514678	SerW	21	D-loop	GGA	A	A	0	393	0.0166806	0	160	0.002079
EBT00001514678	SerW	22	D-stem	GGA	A	A	0.00114547	399.667	0.00166528	0	160.333	0.00207469
EBT00001514678	SerW	23	D-stem	GGA	G	G	0.00518774	400.333	0.000831947	0.00182149	160.667	0
EBT00001514678	SerW	24	D-stem	GGA	G	G	0.00228311	400.667	0.000831255	0.00161812	160.667	0
EBT00001514678	SerW	25	D-stem	GGA	A	A	0	401	0.00165975	0.00526111	160.667	0
EBT00001514678	SerW	26		GGA	G	G	0.00172041	401.667	0.000829187	0.00161812	160.667	0
EBT00001514678	SerW	27	Ac-Stem	GGA	C	C	0.000581734	402	0.012285	0	160.667	0
EBT00001514678	SerW	28	Ac-Stem	GGA	A	A	0	407	0.000818331	0.00505774	160.667	0
EBT00001514678	SerW	29	Ac-Stem	GGA	C	C	0.000968992	407.333	0	0.00364299	160.667	0
EBT00001514678	SerW	30	Ac-Stem	GGA	G	G	0.000572738	407.333	0.000817662	0.0089041	160.667	0
EBT00001514678	SerW	31	Ac-Stem	GGA	C	C	0.000572738	407.667	0.00649878	0	160.667	0
EBT00001514678	SerW	32	Ac-loop	GGA	C	C	0	410.333	0.0128308	0.00904871	160.667	0
EBT00001514678	SerW	33	Ac-loop	GGA	T	U	0	415.667	0.000801282	0	160.667	0
EBT00001514678	SerW	34	Ac-loop	GGA	G	G	0.00207041	416	0.00952381	0.00323625	160.667	0
EBT00001514678	SerW	35	Ac-loop	GGA	G	G	0.000559284	420	0.0374332	0.00343962	160.667	0.0340681
EBT00001514678	SerW	36	Ac-loop	GGA	A	A	0	436.333	0.170994	0.00341024	166.333	0.343421
EBT00001514678	SerW	37	Ac-loop	GGA	A	A	0	526.333	0.195209	0	253.333	0.0865385
EBT00001514678	SerW	38	Ac-loop	GGA	A	A	0.00411736	654	0.583705	0.00554448	277.333	0.55027
EBT00001514678	SerW	39	Ac-stem	GGA	G	G	0.0028826	1571	0.0457583	0	616.667	0.00484131
EBT00001514678	SerW	40	Ac-stem	GGA	T	Y	0.000283447	1646.33	0.00322906	0.00431293	619.667	0.00958977
EBT00001514678	SerW	41	Ac-stem	GGA	G	G	0.00129343	1651.67	0.0133413	0.00231488	625.667	0.00792812
EBT00001514678	SerW	42	Ac-stem	GGA	T	U	0.000627076	1674	0.00436162	0.00474286	630.667	0.00682415
EBT00001514678	SerW	43	Ac-stem	GGA	G	G	0.0023708	1681.33	0.0814059	0.0011043	635	0.0606509
EBT00001514678	SerW	44	V-region	GGA	T	U	0.000150421	1830.33	0.0136519	0	676	0.0131387
EBT00001514678	SerW	V1	V-region	GGA	A	A	0	1855.67	0.0419893	0.000488043	685	0.031574
EBT00001514678	SerW	V2	V-region	GGA	T	U	0.00255938	1937	0.005987	0.00621257	707.333	0
EBT00001514678	SerW	V3	V-region	GGA	A	A	0.00104944	1948.67	0.00831213	0.000377929	707.333	0.000471032
EBT00001514678	SerW	V4	V-region	GGA	C	C	0.00538987	1965	0.00673968	0.00084025	707.667	0
EBT00001514678	SerW	V5	V-region	GGA	G	G	0.00185581	1978.33	0.0103385	0.00444383	707.667	0.0070159
EBT00001514678	SerW	V8	V-region	GGA	G	G	0.000458657	1999	0.0397118	0.0028648	712.667	0.0286234
EBT00001514678	SerW	V9	V-region	GGA	C	C	0.00184675	2081.67	0.0229975	0.0571463	733.667	0
EBT00001514678	SerW	V10	V-region	GGA	A	A	0.000127812	2130.67	0.0203831	0	733.667	0.0325275
EBT00001514678	SerW	V11	V-region	GGA	A	A	0.000251857	2175	0.0170232	0.00158219	758.333	0.0189737
EBT00001514678	SerW	V15	V-region	GGA	C	C	0.000593649	2212.67	0.0168839	0.0019663	773	0.0194503
EBT00001514678	SerW	V16	V-region	GGA	G	G	0.000605914	2250.67	0.0463277	0.00101729	788.333	0.0456013
EBT00001514678	SerW	V17	V-region	GGA	T	U	0.000620607	2360	0.00673401	0.00263829	826	0.00760913
EBT00001514678	SerW	V18	V-region	GGA	A	A	0.000439437	2376	0.0121951	0.0119892	832.333	0.160954
EBT00001514678	SerW	V19	V-region	GGA	T	U	0.00106236	2405.33	0.000969127	0.00118031	992	0.00334896
EBT00001514678	SerW	48	V-region	GGA	C	C	0.00181251	2407.67	0.0035867	0.00373213	995.333	0.00433478
EBT00001514678	SerW	49	T-stem	GGA	G	G	0.00293514	2416.33	0.00151515	0.0190081	999.667	0
EBT00001514678	SerW	50	T-stem	GGA	G	G	0.00113205	2420	0.000825764	0.0403837	999.667	0
EBT00001514678	SerW	51	T-stem	GGA	G	G	0.000789038	2422	0.000275179	0.00295058	999.667	0
EBT00001514678	SerW	52	T-stem	GGA	G	G	0.000922598	2422.67	0.000687474	0.00354868	999.667	0
EBT00001514678	SerW	53	T-stem	GGA	G	G	0.00113155	2424.33	0.00164722	0.00322999	999.667	0.00199667
EBT00001514678	SerW	54	T-loop	GGA	T	T	0.00130498	2428.33	0	0.00548184	1001.67	0
EBT00001514678	SerW	55	T-loop	GGA	T	Y	0.000382334	2428.33	0	0.00288737	1001.67	0
EBT00001514678	SerW	56	T-loop	GGA	C	C	0.00164561	2428.33	0	0.00163113	1001.67	0
EBT00001514678	SerW	57	T-loop	GGA	G	G	0.00119203	2427.67	0.000274536	0.000279408	1001.67	0
EBT00001514678	SerW	58	T-loop	GGA	A	A	0.000357667	2428.33	0	0.00104049	1001.67	0
EBT00001514678	SerW	59	T-loop	GGA	A	A	0.000651316	2428.33	0	0.00204914	1001.67	0
EBT00001514678	SerW	60	T-loop	GGA	T	U	0.00152033	2428	0	0.00413231	1001.67	0
EBT00001514678	SerW	61	T-stem	GGA	C	C	0.00211013	2417.67	0.0042559	0.00219352	999	0.00266223
EBT00001514678	SerW	62	T-stem	GGA	C	C	0.00215383	2428	0.000137268	0.00580656	1001.67	0
EBT00001514678	SerW	63	T-stem	GGA	C	C	0.00148763	2428.33	0	0.00548184	1001.67	0
EBT00001514678	SerW	64	T-stem	GGA	C	C	0.00128032	2428.33	0	0.0401346	1001.67	0
EBT00001514678	SerW	65	T-stem	GGA	C	C	0.00343217	2428.33	0	0.00502934	1001.67	0
EBT00001514678	SerW	66	Acc-stem	GGA	C	C	0.00226463	2428.33	0	0.00298285	1001.67	0
EBT00001514678	SerW	67	Acc-stem	GGA	C	C	0.00234391	2428.33	0	0.00277839	1001.67	0
EBT00001514678	SerW	68	Acc-stem	GGA	T	U	0.00296876	2428	0.000137268	0.00340086	1001.67	0
EBT00001514678	SerW	69	Acc-stem	GGA	C	C	0.00175426	2428.33	0	0.00225141	1001.67	0
EBT00001514678	SerW	70	Acc-stem	GGA	A	A	0.00240323	2428.33	0	0.153154	1001.67	0
EBT00001514678	SerW	71	Acc-stem	GGA	C	C	0.00119926	2428.33	0	0.00340423	1001.33	0.000332779
EBT00001514678	SerW	72	Acc-stem	GGA	C	C	0.00321958	2428.33	0	0.00706074	1001.67	0
EBT00001514678	SerW	73		GGA	G	G	0.00527276	2428.33	0	0.00693389	1001	0.000332889
EBT00001514678	SerW	74		GGA	C	C	0.00104128	2428.33	0	0.00145897	1001.33	0.000332779
EBT00001514678	SerW	75		GGA	C	C	0	2428.33	0	0	1001.67	0
EBT00001514678	SerW	76		GGA	A	A	0	2196.67	0	0	817	0
EBT00001514689	SerT	1	Acc-stem	UGA	G	G	NA	30.6667	NA	NA	0	NA
EBT00001514689	SerT	2	Acc-stem	UGA	G	G	NA	31.3333	NA	NA	0	NA
EBT00001514689	SerT	3	Acc-stem	UGA	A	A	NA	31.6667	NA	NA	0	NA
EBT00001514689	SerT	4	Acc-stem	UGA	A	A	NA	32	NA	NA	0	NA
EBT00001514689	SerT	5	Acc-stem	UGA	G	G	NA	32	NA	NA	0	NA
EBT00001514689	SerT	6	Acc-stem	UGA	T	U	NA	32	NA	NA	0	NA
EBT00001514689	SerT	7	Acc-stem	UGA	G	G	NA	32.3333	NA	NA	0	NA
EBT00001514689	SerT	8		UGA	T	s4U	NA	32.6667	NA	NA	0	NA
EBT00001514689	SerT	9		UGA	G	G	NA	33	NA	NA	0	NA
EBT00001514689	SerT	10	D-stem	UGA	G	G	NA	34	NA	NA	0	NA
EBT00001514689	SerT	11	D-stem	UGA	C	C	NA	34.6667	NA	NA	0	NA
EBT00001514689	SerT	12	D-stem	UGA	C	C	NA	35	NA	NA	0	NA
EBT00001514689	SerT	13	D-stem	UGA	G	G	NA	35	NA	NA	0	NA
EBT00001514689	SerT	14	D-loop	UGA	A	A	NA	35.3333	NA	NA	0	NA
EBT00001514689	SerT	15	D-loop	UGA	G	G	NA	35.3333	NA	NA	0	NA
EBT00001514689	SerT	16	D-loop	UGA	C	C	NA	35.6667	NA	NA	0	NA
EBT00001514689	SerT	18	D-loop	UGA	G	Gm	NA	35.6667	NA	NA	0	NA
EBT00001514689	SerT	19	D-loop	UGA	G	G	NA	36	NA	NA	0	NA
EBT00001514689	SerT	20	D-loop	UGA	T	DD	NA	36	NA	NA	0	NA
EBT00001514689	SerT	20a	D-loop	UGA	T	DD	NA	36	NA	NA	0	NA
EBT00001514689	SerT	20b	D-loop	UGA	G	G	NA	37	NA	NA	0	NA
EBT00001514689	SerT	21	D-loop	UGA	A	A	NA	37	NA	NA	0	NA
EBT00001514689	SerT	22	D-stem	UGA	A	A	NA	37	NA	NA	0	NA
EBT00001514689	SerT	23	D-stem	UGA	G	G	NA	37	NA	NA	0	NA
EBT00001514689	SerT	24	D-stem	UGA	G	G	NA	37	NA	NA	0	NA
EBT00001514689	SerT	25	D-stem	UGA	C	C	NA	37.3333	NA	NA	0	NA
EBT00001514689	SerT	26		UGA	A	A	NA	37.3333	NA	NA	0	NA
EBT00001514689	SerT	27	Ac-Stem	UGA	C	C	NA	37.3333	NA	NA	0	NA
EBT00001514689	SerT	28	Ac-Stem	UGA	C	C	NA	37.3333	NA	NA	0	NA
EBT00001514689	SerT	29	Ac-Stem	UGA	G	G	NA	38.3333	NA	NA	0	NA
EBT00001514689	SerT	30	Ac-Stem	UGA	G	G	NA	38.3333	NA	NA	0	NA
EBT00001514689	SerT	31	Ac-Stem	UGA	T	U	NA	39	NA	NA	0	NA
EBT00001514689	SerT	32	Ac-loop	UGA	C	Cm	NA	39	NA	NA	0	NA
EBT00001514689	SerT	33	Ac-loop	UGA	T	U	NA	39.3333	NA	NA	0	NA
EBT00001514689	SerT	34	Ac-loop	UGA	T	mcmo5U	NA	39.3333	NA	NA	6.66667	NA
EBT00001514689	SerT	35	Ac-loop	UGA	G	G	NA	60.3333	NA	NA	20.3333	NA
EBT00001514689	SerT	36	Ac-loop	UGA	A	A	0	103	0.267773	NA	35	NA
EBT00001514689	SerT	37	Ac-loop	UGA	A	ms2i6A	0.0522754	140.667	0.744397	NA	40.6667	NA
EBT00001514689	SerT	38	Ac-loop	UGA	A	A	0.0345588	550.333	0.46535	NA	90.3333	NA
EBT00001514689	SerT	39	Ac-stem	UGA	A	A	0.00282402	1029.33	0.0460303	0	176	0.0258303
EBT00001514689	SerT	40	Ac-stem	UGA	C	C	0.000660157	1079	0.00827206	0	180.667	0.040708
EBT00001514689	SerT	41	Ac-stem	UGA	C	C	0.00222302	1088	0.00274977	0.00238095	188.333	0.00176679
EBT00001514689	SerT	42	Ac-stem	UGA	G	G	0.00110098	1091	0.00213415	0.00457925	188.667	0
EBT00001514689	SerT	43	Ac-stem	UGA	G	G	0.000567859	1093.33	0.00575932	0.00141243	188.667	0
EBT00001514689	SerT	44	V-region	UGA	C	C	0.00120017	1099.67	0.00452625	0	188.667	0
EBT00001514689	SerT	V1	V-region	UGA	G	G	0.00129875	1104.67	0.00570057	0.00141243	188.667	0
EBT00001514689	SerT	V2	V-region	UGA	A	A	0.000641257	1111	0.00119868	0.00238095	188.667	0
EBT00001514689	SerT	V3	V-region	UGA	C	C	0.00156882	1112.33	0.0020933	0.00238095	188.667	0.00352113
EBT00001514689	SerT	V4	V-region	UGA	C	C	0.000555556	1114.67	0.00238663	0	189.333	0
EBT00001514689	SerT	V5	V-region	UGA	C	C	0.00101595	1117.33	0.00267777	0.0055359	189.333	0
EBT00001514689	SerT	V8	V-region	UGA	G	G	0.000809729	1120.33	0.0056213	0	189.333	0
EBT00001514689	SerT	V9	V-region	UGA	A	A	0.000265182	1126.67	0.00646678	0.00518207	189.333	0
EBT00001514689	SerT	V10	V-region	UGA	A	A	0	1134	0.00497221	0	189.333	0
EBT00001514689	SerT	V11	V-region	UGA	A	A	0.000270343	1139.67	0.0029163	0	189.333	0
EBT00001514689	SerT	V15	V-region	UGA	G	G	0.00258117	1143	0.00203725	0.00140056	189.333	0.0121739
EBT00001514689	SerT	V16	V-region	UGA	G	G	0.00062299	1145.33	0.000581734	0.00685643	191.667	0
EBT00001514689	SerT	V17	V-region	UGA	G	G	0.00106051	1146	0.00434405	0.00136054	191.667	0.00862069
EBT00001514689	SerT	V18	V-region	UGA	T	U	0.00142031	1151	0.00144592	0.0126917	193.333	0
EBT00001514689	SerT	V19	V-region	UGA	T	U	0.00160273	1152.67	0.000289101	0.00350877	193.333	0
EBT00001514689	SerT	48	V-region	UGA	C	C	0.000787041	1153	0.00345722	0.00133333	193.333	0
EBT00001514689	SerT	49	T-stem	UGA	C	C	0.00265443	1157	0.00885208	0.00638095	193.333	0
EBT00001514689	SerT	50	T-stem	UGA	A	A	0.00026062	1167.33	0.00085592	0	193.333	0.0202703
EBT00001514689	SerT	51	T-stem	UGA	G	G	0.00236629	1168.33	0.00227726	0.00133333	197.333	0.0100334
EBT00001514689	SerT	52	T-stem	UGA	A	A	0	1171	0.000284576	0	199.333	0
EBT00001514689	SerT	53	T-stem	UGA	G	G	0.00139503	1171.33	0.00509626	0.00130208	199.333	0.00499168
EBT00001514689	SerT	54	T-loop	UGA	T	T	0.00163731	1177.33	0	0.00295225	200.333	0
EBT00001514689	SerT	55	T-loop	UGA	T	Y	0.00112508	1177	0	0.00130208	200.333	0
EBT00001514689	SerT	56	T-loop	UGA	C	C	0.00112508	1177	0.000283125	0.0121417	200.333	0
EBT00001514689	SerT	57	T-loop	UGA	G	G	0.00112727	1177.33	0	0.00130208	200.333	0
EBT00001514689	SerT	58	T-loop	UGA	A	A	0.000256213	1177.33	0	0	200	0.00166389
EBT00001514689	SerT	59	T-loop	UGA	A	A	0	1177.33	0	0	200.333	0
EBT00001514689	SerT	60	T-loop	UGA	T	U	0.000868669	1177.33	0	0.00788742	200.333	0
EBT00001514689	SerT	61	T-stem	UGA	C	C	0.000868669	1177.33	0	0.00390625	200.333	0
EBT00001514689	SerT	62	T-stem	UGA	T	U	0.00122014	1177.33	0	0.00493517	200.333	0
EBT00001514689	SerT	63	T-stem	UGA	C	C	0.00103261	1177	0	0.00295225	200.333	0
EBT00001514689	SerT	64	T-stem	UGA	T	U	0.00199766	1174.67	0	0.0161825	200.333	0
EBT00001514689	SerT	65	T-stem	UGA	G	G	0.00919047	1174.67	0.00226501	0.0082355	200.333	0
EBT00001514689	SerT	66	Acc-stem	UGA	C	C	0.00305512	1177.33	0	0.0102337	200.333	0
EBT00001514689	SerT	67	Acc-stem	UGA	G	G	0.00337703	1177.33	0	0.00555642	200.333	0
EBT00001514689	SerT	68	Acc-stem	UGA	C	C	0.00283266	1177.33	0	0.00165017	200.333	0
EBT00001514689	SerT	69	Acc-stem	UGA	T	U	0.00102962	1177.33	0	0.00596409	200.333	0
EBT00001514689	SerT	70	Acc-stem	UGA	T	U	0.00189352	1177.33	0	0.00528325	200.333	0
EBT00001514689	SerT	71	Acc-stem	UGA	C	C	0.00235039	1177	0.000283125	0.00295225	200.333	0
EBT00001514689	SerT	72	Acc-stem	UGA	C	C	0.00382376	1177.33	0	0.00260417	200.333	0
EBT00001514689	SerT	73		UGA	G	G	0.00518722	1177.33	0	0.00520833	200.333	0
EBT00001514689	SerT	74		UGA	C	C	0.000256213	1177.33	0	0	200.333	0
EBT00001514689	SerT	75		UGA	C	C	0	1177.33	0	0	200.333	0
EBT00001514689	SerT	76		UGA	A	A	0	1038.67	0	0	160	0
EBT00001514612	TyrT	1	Acc-stem	GUA	G	G	NA	0	NA	NA	0	NA
EBT00001514612	TyrT	2	Acc-stem	GUA	G	G	NA	0	NA	NA	0	NA
EBT00001514612	TyrT	3	Acc-stem	GUA	T	U	NA	0	NA	NA	0	NA
EBT00001514612	TyrT	4	Acc-stem	GUA	G	G	NA	0	NA	NA	0	NA
EBT00001514612	TyrT	5	Acc-stem	GUA	G	G	NA	0	NA	NA	0	NA
EBT00001514612	TyrT	6	Acc-stem	GUA	G	G	NA	0	NA	NA	0	NA
EBT00001514612	TyrT	7	Acc-stem	GUA	G	G	NA	0	NA	NA	0	NA
EBT00001514612	TyrT	8		GUA	T	s4U	NA	0	NA	NA	0	NA
EBT00001514612	TyrT	9		GUA	T	s4U	NA	0	NA	NA	0	NA
EBT00001514612	TyrT	10	D-stem	GUA	C	C	NA	0	NA	NA	0.333333	NA
EBT00001514612	TyrT	11	D-stem	GUA	C	C	NA	0	NA	NA	0.333333	NA
EBT00001514612	TyrT	12	D-stem	GUA	C	C	NA	0	NA	NA	0.333333	NA
EBT00001514612	TyrT	13	D-stem	GUA	G	G	NA	0	NA	NA	0.333333	NA
EBT00001514612	TyrT	14	D-loop	GUA	A	A	NA	0	NA	NA	0.333333	NA
EBT00001514612	TyrT	15	D-loop	GUA	G	G	NA	0	NA	NA	0.333333	NA
EBT00001514612	TyrT	16	D-loop	GUA	C	C	NA	0	NA	NA	0.333333	NA
EBT00001514612	TyrT	18	D-loop	GUA	G	Gm	NA	0	NA	NA	0.333333	NA
EBT00001514612	TyrT	19	D-loop	GUA	G	G	NA	0	NA	NA	0.333333	NA
EBT00001514612	TyrT	20	D-loop	GUA	C	C	NA	0	NA	NA	0.333333	NA
EBT00001514612	TyrT	20a	D-loop	GUA	C	C	NA	0	NA	NA	0.333333	NA
EBT00001514612	TyrT	20b	D-loop	GUA	A	A	NA	0	NA	NA	0.333333	NA
EBT00001514612	TyrT	21	D-loop	GUA	A	A	NA	0	NA	NA	0.333333	NA
EBT00001514612	TyrT	22	D-stem	GUA	A	A	NA	0	NA	NA	0.333333	NA
EBT00001514612	TyrT	23	D-stem	GUA	G	G	NA	0	NA	NA	0.333333	NA
EBT00001514612	TyrT	24	D-stem	GUA	G	G	NA	0	NA	NA	0.333333	NA
EBT00001514612	TyrT	25	D-stem	GUA	G	G	NA	0	NA	NA	0.333333	NA
EBT00001514612	TyrT	26		GUA	A	A	NA	0	NA	NA	0.333333	NA
EBT00001514612	TyrT	27	Ac-Stem	GUA	G	G	NA	0	NA	NA	0.333333	NA
EBT00001514612	TyrT	28	Ac-Stem	GUA	C	C	NA	0	NA	NA	0.333333	NA
EBT00001514612	TyrT	29	Ac-Stem	GUA	A	A	NA	0	NA	NA	0.333333	NA
EBT00001514612	TyrT	30	Ac-Stem	GUA	G	G	NA	0	NA	NA	0.333333	NA
EBT00001514612	TyrT	31	Ac-Stem	GUA	A	A	NA	0	NA	NA	0.333333	NA
EBT00001514612	TyrT	32	Ac-loop	GUA	C	C	NA	0	NA	NA	0.333333	NA
EBT00001514612	TyrT	33	Ac-loop	GUA	T	U	NA	0	NA	NA	0.333333	NA
EBT00001514612	TyrT	34	Ac-loop	GUA	G	Q	NA	2.66667	NA	NA	9.66667	NA
EBT00001514612	TyrT	35	Ac-loop	GUA	T	Y	NA	7	NA	NA	20	NA
EBT00001514612	TyrT	36	Ac-loop	GUA	A	A	NA	13.6667	NA	NA	24.3333	NA
EBT00001514612	TyrT	37	Ac-loop	GUA	A	ms2i6A	NA	18.3333	NA	NA	36	NA
EBT00001514612	TyrT	38	Ac-loop	GUA	A	A	NA	76	NA	0.105653	153.333	0.38911
EBT00001514612	TyrT	39	Ac-stem	GUA	T	Y	0.00392157	136.667	0.0261283	0.00247673	251	0.030888
EBT00001514612	TyrT	40	Ac-stem	GUA	C	C	0.00392157	140.333	0.025463	0	259	0.00512164
EBT00001514612	TyrT	41	Ac-stem	GUA	T	U	0.00189394	144	0	0.00824734	260.333	0.00255428
EBT00001514612	TyrT	42	Ac-stem	GUA	G	G	0.0052112	144	0.00230947	0	261	0.00127551
EBT00001514612	TyrT	43	Ac-stem	GUA	C	C	0.00252525	144.333	0.00230415	0.00193798	261.333	0.00254453
EBT00001514612	TyrT	44	V-region	GUA	C	C	0.00250627	144.667	0	0.00696239	262	0.00253807
EBT00001514612	TyrT	V1	V-region	GUA	G	G	0	144.667	0.00913242	0	262.667	0
EBT00001514612	TyrT	V2	V-region	GUA	T	U	0	146	0	0.00193798	262.667	0
EBT00001514612	TyrT	V3	V-region	GUA	C	C	0	146	0.0373626	0	262.667	0.0199005
EBT00001514612	TyrT	V8	V-region	GUA	A	A	0	151.667	0.038055	0	268	0.0301568
EBT00001514612	TyrT	V9	V-region	GUA	T	U	0	157.667	0.0021097	0	276.333	0.00360577
EBT00001514612	TyrT	V10	V-region	GUA	C	C	0	158	0	0	277.333	0
EBT00001514612	TyrT	V17	V-region	GUA	G	G	0	158	0	0	277.333	0
EBT00001514612	TyrT	V18	V-region	GUA	A	A	0	158	0	0	277.333	0
EBT00001514612	TyrT	V19	V-region	GUA	C	C	0	158	0	0	277.333	0
EBT00001514612	TyrT	46	V-region	GUA	T	U	0	158	0	0.000805153	277.333	0
EBT00001514612	TyrT	47	V-region	GUA	T	U	0	158	0	0	277.333	0
EBT00001514612	TyrT	48	V-region	GUA	C	C	0	158	0	0	277.333	0
EBT00001514612	TyrT	49	T-stem	GUA	G	G	0	158	0	0	277.333	0
EBT00001514612	TyrT	50	T-stem	GUA	A	A	0	158	0	0	277.333	0
EBT00001514612	TyrT	51	T-stem	GUA	A	A	0.00228311	158	0	0	277.333	0
EBT00001514612	TyrT	52	T-stem	GUA	G	G	0.0156448	158	0	0.0213684	277.333	0
EBT00001514612	TyrT	53	T-stem	GUA	G	G	0.0139266	158	0	0.0329118	277.333	0
EBT00001514612	TyrT	54	T-loop	GUA	T	T	0.0337313	157.333	0.00421941	0.0588824	277.333	0
EBT00001514612	TyrT	55	T-loop	GUA	T	Y	0.0244168	158	0	0.0363232	277.333	0
EBT00001514612	TyrT	56	T-loop	GUA	C	C	0.0879714	158	0	0.0864653	277.333	0
EBT00001514612	TyrT	57	T-loop	GUA	G	G	0.176284	157	0.00632911	0.1112	277.333	0
EBT00001514612	TyrT	58	T-loop	GUA	A	A	0.0373946	158	0	0.0531678	277.333	0
EBT00001514612	TyrT	59	T-loop	GUA	A	A	0.0565008	158	0	0.102068	277.333	0
EBT00001514612	TyrT	60	T-loop	GUA	T	U	0.107509	156.667	0	0.118121	277.333	0
EBT00001514612	TyrT	61	T-stem	GUA	C	C	0.157196	156.333	0	0.135156	277.333	0
EBT00001514612	TyrT	62	T-stem	GUA	C	C	0.11043	155	0	0.108961	277.333	0
EBT00001514612	TyrT	63	T-stem	GUA	T	U	0.136867	154.333	0.0148936	0.20668	276.667	0.00240385
EBT00001514612	TyrT	64	T-stem	GUA	T	U	0.0574206	156.667	0.0063425	0.0638892	277.333	0
EBT00001514612	TyrT	65	T-stem	GUA	C	C	0.0753388	157.667	0	0.0926538	277	0.00120192
EBT00001514612	TyrT	66	Acc-stem	GUA	C	C	0.039896	157.667	0.0021097	0.0474025	277.333	0
EBT00001514612	TyrT	67	Acc-stem	GUA	C	C	0.0423212	158	0	0.0603804	277.333	0
EBT00001514612	TyrT	68	Acc-stem	GUA	C	C	0.0106947	158	0	0.0363422	277.333	0
EBT00001514612	TyrT	69	Acc-stem	GUA	C	C	0.0165951	158	0	0.0159887	277.333	0
EBT00001514612	TyrT	70	Acc-stem	GUA	A	A	0.0307262	158	0	0.0597298	277	0.00120192
EBT00001514612	TyrT	71	Acc-stem	GUA	C	C	0.0102857	158	0	0.021754	277.333	0
EBT00001514612	TyrT	72	Acc-stem	GUA	C	C	0.0156448	158	0	0.0228474	277.333	0
EBT00001514612	TyrT	73		GUA	A	A	0.0160302	158	0	0.0387894	277.333	0
EBT00001514612	TyrT	74		GUA	C	C	0.0122084	158	0	0.013783	277.333	0
EBT00001514612	TyrT	75		GUA	C	C	0	158	0	0	277.333	0
EBT00001514612	TyrT	76		GUA	A	A	0	135.667	0	0	235	0
EBT00001514598	TyrU	1	Acc-stem	GUA	G	G	NA	0	NA	NA	0	NA
EBT00001514598	TyrU	2	Acc-stem	GUA	G	G	NA	0	NA	NA	0	NA
EBT00001514598	TyrU	3	Acc-stem	GUA	T	U	NA	0	NA	NA	0	NA
EBT00001514598	TyrU	4	Acc-stem	GUA	G	G	NA	0	NA	NA	16.3333	NA
EBT00001514598	TyrU	5	Acc-stem	GUA	G	G	NA	0	NA	NA	16.3333	NA
EBT00001514598	TyrU	6	Acc-stem	GUA	G	G	NA	0	NA	NA	16.3333	NA
EBT00001514598	TyrU	7	Acc-stem	GUA	G	G	NA	0	NA	NA	16.3333	NA
EBT00001514598	TyrU	8		GUA	T	s4U	NA	0	NA	NA	16.3333	NA
EBT00001514598	TyrU	9		GUA	T	s4U	NA	0	NA	NA	25	NA
EBT00001514598	TyrU	10	D-stem	GUA	C	C	NA	0	NA	NA	25	NA
EBT00001514598	TyrU	11	D-stem	GUA	C	C	NA	0	NA	NA	25	NA
EBT00001514598	TyrU	12	D-stem	GUA	C	C	NA	0	NA	NA	25	NA
EBT00001514598	TyrU	13	D-stem	GUA	G	G	NA	0	NA	NA	25	NA
EBT00001514598	TyrU	14	D-loop	GUA	A	A	NA	0	NA	NA	25	NA
EBT00001514598	TyrU	15	D-loop	GUA	G	G	NA	0	NA	NA	25	NA
EBT00001514598	TyrU	16	D-loop	GUA	C	C	NA	0	NA	NA	25	NA
EBT00001514598	TyrU	18	D-loop	GUA	G	Gm	NA	0	NA	NA	25	NA
EBT00001514598	TyrU	19	D-loop	GUA	G	G	NA	0	NA	NA	25	NA
EBT00001514598	TyrU	20	D-loop	GUA	C	C	NA	0	NA	NA	25	NA
EBT00001514598	TyrU	20a	D-loop	GUA	C	C	NA	0	NA	NA	25.3333	NA
EBT00001514598	TyrU	20b	D-loop	GUA	A	A	NA	0	NA	NA	25.3333	NA
EBT00001514598	TyrU	21	D-loop	GUA	A	A	NA	0	NA	NA	25.3333	NA
EBT00001514598	TyrU	22	D-stem	GUA	A	A	NA	0	NA	NA	25.3333	NA
EBT00001514598	TyrU	23	D-stem	GUA	G	G	NA	0	NA	NA	25.3333	NA
EBT00001514598	TyrU	24	D-stem	GUA	G	G	NA	0	NA	NA	25.3333	NA
EBT00001514598	TyrU	25	D-stem	GUA	G	G	NA	0	NA	NA	25.3333	NA
EBT00001514598	TyrU	26		GUA	A	A	NA	0	NA	NA	25.3333	NA
EBT00001514598	TyrU	27	Ac-Stem	GUA	G	G	NA	0	NA	NA	25.3333	NA
EBT00001514598	TyrU	28	Ac-Stem	GUA	C	C	NA	0	NA	NA	25.3333	NA
EBT00001514598	TyrU	29	Ac-Stem	GUA	A	A	NA	0	NA	NA	25.3333	NA
EBT00001514598	TyrU	30	Ac-Stem	GUA	G	G	NA	0	NA	NA	25.3333	NA
EBT00001514598	TyrU	31	Ac-Stem	GUA	A	A	NA	0	NA	NA	25.3333	NA
EBT00001514598	TyrU	32	Ac-loop	GUA	C	C	NA	0	NA	NA	25.3333	NA
EBT00001514598	TyrU	33	Ac-loop	GUA	T	U	NA	0	NA	NA	25.3333	NA
EBT00001514598	TyrU	34	Ac-loop	GUA	G	Q	NA	2.66667	NA	NA	35.3333	NA
EBT00001514598	TyrU	35	Ac-loop	GUA	T	Y	NA	10	NA	NA	51.6667	NA
EBT00001514598	TyrU	36	Ac-loop	GUA	A	A	NA	15	NA	NA	63.3333	NA
EBT00001514598	TyrU	37	Ac-loop	GUA	A	ms2i6A	NA	26	NA	NA	75.3333	NA
EBT00001514598	TyrU	38	Ac-loop	GUA	A	A	0.0405435	113	0.383636	0.0248108	275	0.371189
EBT00001514598	TyrU	39	Ac-stem	GUA	T	Y	0.00353922	183.333	0.0401396	0.00572442	437.333	0.0367107
EBT00001514598	TyrU	40	Ac-stem	GUA	C	C	0	191	0.0103627	0.00141526	454	0.00365765
EBT00001514598	TyrU	41	Ac-stem	GUA	T	U	0.0014556	193	0.00344234	0.00589758	455.667	0.000730994
EBT00001514598	TyrU	42	Ac-stem	GUA	G	G	0.00144928	193.667	0.00343053	0.000953743	456	0
EBT00001514598	TyrU	43	Ac-stem	GUA	C	C	0.00331566	194.333	0.00171233	0.111655	456	0.0122744
EBT00001514598	TyrU	44	V-region	GUA	C	C	0.00143678	194.667	0.00680272	0.00227461	461.667	0
EBT00001514598	TyrU	V1	V-region	GUA	G	G	0.00191571	196	0.0084317	0.000945626	461.667	0.00502874
EBT00001514598	TyrU	V2	V-region	GUA	T	U	0.00189394	197.667	0	0.00183768	464	0.000717875
EBT00001514598	TyrU	V3	V-region	GUA	C	C	0	197.667	0.0198347	0.00230608	464.333	0.0106534
EBT00001514598	TyrU	V8	V-region	GUA	A	A	0	201.667	0.00329489	0	469.333	0.00424328
EBT00001514598	TyrU	V9	V-region	GUA	C	C	0	202.333	0.0193861	0.116173	471.333	0.0146341
EBT00001514598	TyrU	V10	V-region	GUA	A	A	0	206.333	0	0	478.333	0
EBT00001514598	TyrU	V17	V-region	GUA	G	G	0	206.333	0	0	478.333	0
EBT00001514598	TyrU	V18	V-region	GUA	A	A	0	206.333	0	0	478.333	0
EBT00001514598	TyrU	V19	V-region	GUA	C	C	0	206.333	0	0	478.333	0
EBT00001514598	TyrU	46	V-region	GUA	T	U	0	206.333	0	0	478.333	0
EBT00001514598	TyrU	47	V-region	GUA	T	U	0	206.333	0	0.0014905	478.333	0
EBT00001514598	TyrU	48	V-region	GUA	C	C	0	206.333	0	0.0014905	478.333	0
EBT00001514598	TyrU	49	T-stem	GUA	G	G	0	206.333	0	0.00132431	478.333	0
EBT00001514598	TyrU	50	T-stem	GUA	A	A	0	206.333	0	0	478.333	0
EBT00001514598	TyrU	51	T-stem	GUA	A	A	0	206	0	0.000458505	478.333	0
EBT00001514598	TyrU	52	T-stem	GUA	G	G	0.0117669	205.667	0.00161812	0.0106857	478.333	0
EBT00001514598	TyrU	53	T-stem	GUA	G	G	0.00989954	206	0	0.0152833	478.333	0
EBT00001514598	TyrU	54	T-loop	GUA	T	T	0.0508969	205.667	0.00161812	0.0558902	478.333	0
EBT00001514598	TyrU	55	T-loop	GUA	T	Y	0.0310097	206	0	0.0341463	478.333	0
EBT00001514598	TyrU	56	T-loop	GUA	C	C	0.117748	206	0	0.0616393	478.333	0
EBT00001514598	TyrU	57	T-loop	GUA	G	G	0.142735	206	0	0.103132	478	0
EBT00001514598	TyrU	58	T-loop	GUA	A	A	0.0252534	205.333	0.00484653	0.0446536	477.667	0.00139373
EBT00001514598	TyrU	59	T-loop	GUA	A	A	0.062327	206.333	0	0.0649318	478.333	0
EBT00001514598	TyrU	60	T-loop	GUA	T	U	0.103197	206.333	0	0.111825	478.333	0
EBT00001514598	TyrU	61	T-stem	GUA	C	C	0.167337	206.333	0	0.122017	477.667	0.00139373
EBT00001514598	TyrU	62	T-stem	GUA	C	C	0.130191	206	0	0.0950385	478.333	0
EBT00001514598	TyrU	63	T-stem	GUA	T	U	0.126586	205	0	0.165738	476.333	0.00418118
EBT00001514598	TyrU	64	T-stem	GUA	T	U	0.0757698	205	0.00646203	0.0665982	478.333	0
EBT00001514598	TyrU	65	T-stem	GUA	C	C	0.0653948	206.333	0	0.0636624	478	0.000696864
EBT00001514598	TyrU	66	Acc-stem	GUA	C	C	0.0416571	206.333	0	0.158596	478.333	0
EBT00001514598	TyrU	67	Acc-stem	GUA	C	C	0.0319668	206.333	0	0.0287839	478.333	0
EBT00001514598	TyrU	68	Acc-stem	GUA	C	C	0.0264397	206.333	0	0.0333191	478.333	0
EBT00001514598	TyrU	69	Acc-stem	GUA	C	C	0.0184463	206.333	0	0.0220711	478.333	0
EBT00001514598	TyrU	70	Acc-stem	GUA	A	A	0.0322818	206	0.00161551	0.164134	477.667	0.00069735
EBT00001514598	TyrU	71	Acc-stem	GUA	C	C	0.011231	206.333	0	0.018615	478	0.000696864
EBT00001514598	TyrU	72	Acc-stem	GUA	C	C	0.012985	206.333	0	0.014189	478.333	0
EBT00001514598	TyrU	73		GUA	A	A	0.0196647	206.333	0	0.0328718	478.333	0
EBT00001514598	TyrU	74		GUA	C	C	0.010387	206.333	0	0.0088517	478.333	0
EBT00001514598	TyrU	75		GUA	C	C	0	206.333	0	0	478.333	0
EBT00001514598	TyrU	76		GUA	A	A	0	184.333	0	0	406.333	0
EBT00001514621	ValV	1	Acc-stem	GAC	G	G	NA	0.333333	NA	NA	0.333333	NA
EBT00001514621	ValV	2	Acc-stem	GAC	C	C	NA	0.333333	NA	NA	0.333333	NA
EBT00001514621	ValV	3	Acc-stem	GAC	G	G	NA	0.333333	NA	NA	0.333333	NA
EBT00001514621	ValV	4	Acc-stem	GAC	T	U	NA	0.333333	NA	NA	0.333333	NA
EBT00001514621	ValV	5	Acc-stem	GAC	T	U	NA	0.333333	NA	NA	0.333333	NA
EBT00001514621	ValV	6	Acc-stem	GAC	C	C	NA	0.333333	NA	NA	0.333333	NA
EBT00001514621	ValV	7	Acc-stem	GAC	A	A	NA	0.333333	NA	NA	0.333333	NA
EBT00001514621	ValV	8		GAC	T	s4U	NA	0.333333	NA	NA	0.333333	NA
EBT00001514621	ValV	9		GAC	A	A	NA	0.333333	NA	NA	0.333333	NA
EBT00001514621	ValV	10	D-stem	GAC	G	G	NA	0.333333	NA	NA	0.333333	NA
EBT00001514621	ValV	11	D-stem	GAC	C	C	NA	0.333333	NA	NA	0.333333	NA
EBT00001514621	ValV	12	D-stem	GAC	T	U	NA	0.333333	NA	NA	0.333333	NA
EBT00001514621	ValV	13	D-stem	GAC	C	C	NA	0.333333	NA	NA	0.333333	NA
EBT00001514621	ValV	14	D-loop	GAC	A	A	NA	0.333333	NA	NA	0.333333	NA
EBT00001514621	ValV	15	D-loop	GAC	G	G	NA	0.333333	NA	NA	0.333333	NA
EBT00001514621	ValV	16	D-loop	GAC	T	DD	NA	1	NA	NA	0.333333	NA
EBT00001514621	ValV	17	D-loop	GAC	T	DD	NA	1	NA	NA	0.333333	NA
EBT00001514621	ValV	18	D-loop	GAC	G	G	NA	1	NA	NA	0.333333	NA
EBT00001514621	ValV	19	D-loop	GAC	G	G	NA	1	NA	NA	0.333333	NA
EBT00001514621	ValV	20	D-loop	GAC	T	DD	NA	3	NA	NA	0.333333	NA
EBT00001514621	ValV	20a	D-loop	GAC	T	DD	NA	3.33333	NA	NA	0.333333	NA
EBT00001514621	ValV	21	D-loop	GAC	A	A	NA	3.66667	NA	NA	0.333333	NA
EBT00001514621	ValV	22	D-stem	GAC	G	G	NA	5.33333	NA	NA	0.333333	NA
EBT00001514621	ValV	23	D-stem	GAC	A	A	NA	5.33333	NA	NA	0.333333	NA
EBT00001514621	ValV	24	D-stem	GAC	G	G	NA	5.33333	NA	NA	0.333333	NA
EBT00001514621	ValV	25	D-stem	GAC	C	C	NA	5.33333	NA	NA	0.333333	NA
EBT00001514621	ValV	26		GAC	A	A	NA	5.66667	NA	NA	0.333333	NA
EBT00001514621	ValV	27	Ac-Stem	GAC	C	C	NA	6	NA	NA	0.333333	NA
EBT00001514621	ValV	28	Ac-Stem	GAC	C	C	NA	6	NA	NA	0.333333	NA
EBT00001514621	ValV	29	Ac-Stem	GAC	A	A	NA	8.33333	NA	NA	0.333333	NA
EBT00001514621	ValV	30	Ac-Stem	GAC	C	C	NA	8.33333	NA	NA	3.66667	NA
EBT00001514621	ValV	31	Ac-Stem	GAC	C	C	NA	10.3333	NA	NA	12.3333	NA
EBT00001514621	ValV	32	Ac-loop	GAC	T	U	NA	29.3333	NA	NA	20.3333	NA
EBT00001514621	ValV	33	Ac-loop	GAC	T	U	NA	30	NA	NA	20.3333	NA
EBT00001514621	ValV	34	Ac-loop	GAC	G	G	NA	32.3333	NA	NA	20.6667	NA
EBT00001514621	ValV	35	Ac-loop	GAC	A	A	0.00546956	174.333	0.500954	NA	82.3333	NA
EBT00001514621	ValV	36	Ac-loop	GAC	C	C	0	349.333	0.741362	0.00546483	135.667	0.758457
EBT00001514621	ValV	37	Ac-loop	GAC	A	A	0	1350.67	0.461385	0	561.667	0.569494
EBT00001514621	ValV	38	Ac-loop	GAC	T	U	0	2507.67	0.152147	0.000385802	1304.67	0.19249
EBT00001514621	ValV	39	Ac-stem	GAC	G	G	0.000638645	2957.67	0.0236576	0.000966019	1615.67	0.040198
EBT00001514621	ValV	40	Ac-stem	GAC	G	G	0.000529364	3029.33	0.00318087	0.00022119	1683.33	0.00217348
EBT00001514621	ValV	41	Ac-stem	GAC	T	U	0.000541799	3039	0	0.00357379	1687	0
EBT00001514621	ValV	42	Ac-stem	GAC	G	G	0.00129974	2730.33	0.121609	0.00080298	1628	0.0518346
EBT00001514621	ValV	43	Ac-stem	GAC	G	G	0.000752366	3108.33	0.0135407	0.00101442	1717	0.0111346
EBT00001514621	ValV	44	V-region	GAC	G	G	0.00244853	3151	0.000634317	0.00111212	1736.33	0.00268045
EBT00001514621	ValV	45	V-region	GAC	G	G	0.000521912	3153	0.00890612	0.00207306	1741	0.0143423
EBT00001514621	ValV	46	V-region	GAC	G	m7G	0.00108876	3181.33	0.190294	0.00392729	1766.33	0.249965
EBT00001514621	ValV	47	V-region	GAC	T	acp3U	0.202333	3929	0.104263	0.0973973	2355	0.0694152
EBT00001514621	ValV	48	V-region	GAC	C	C	0.000999282	4386.33	0.00911145	0.00326037	2530.67	0.00511073
EBT00001514621	ValV	49	T-stem	GAC	G	G	0.000759873	4426.67	0.13089	0.00112196	2543.67	0.0117845
EBT00001514621	ValV	50	T-stem	GAC	T	U	0.00109382	5093.33	0.013366	0.0048554	2574	0.000647082
EBT00001514621	ValV	51	T-stem	GAC	T	U	0.00073458	5162.33	0.0030898	0.00344177	2575.67	0
EBT00001514621	ValV	52	T-stem	GAC	G	G	0.000690841	5178.33	0.00218383	0.0049598	2575.67	0.00129249
EBT00001514621	ValV	53	T-stem	GAC	G	G	0.000110668	5189.67	0.00536638	0.00136245	2579	0.00693107
EBT00001514621	ValV	54	T-loop	GAC	T	T	0.000322686	5217.67	0	0.00148766	2597	0
EBT00001514621	ValV	55	T-loop	GAC	T	Y	0.0003593	5217.67	0	0.00129813	2597	0
EBT00001514621	ValV	56	T-loop	GAC	C	C	0.000164908	5217.67	0	0.000609138	2597	0
EBT00001514621	ValV	57	T-loop	GAC	G	G	0	5217.67	0	0.00010013	2597	0
EBT00001514621	ValV	58	T-loop	GAC	A	A	0	5217.67	0	0.000399335	2597	0
EBT00001514621	ValV	59	T-loop	GAC	G	G	0.000219974	5217.67	0	0.000755748	2597	0
EBT00001514621	ValV	60	T-loop	GAC	T	U	0.000231006	5217.67	0	0.00187627	2597	0
EBT00001514621	ValV	61	T-stem	GAC	C	C	0.000505949	5217.67	0	0.000599595	2597	0
EBT00001514621	ValV	62	T-stem	GAC	C	C	0.000509851	5217.67	0	0.00398262	2597	0
EBT00001514621	ValV	63	T-stem	GAC	A	A	0.000242135	5217.67	0	0.00066516	2597	0
EBT00001514621	ValV	64	T-stem	GAC	A	A	0.000194392	5217.67	0	0.00175349	2597	0
EBT00001514621	ValV	65	T-stem	GAC	T	U	0.000825359	5217.33	6.39e-05	0.00352725	2597	0
EBT00001514621	ValV	66	Acc-stem	GAC	T	U	0.00106745	5217.67	0	0.00451902	2597	0
EBT00001514621	ValV	67	Acc-stem	GAC	G	G	0.00052811	5217.67	0	0.00293839	2597	0
EBT00001514621	ValV	68	Acc-stem	GAC	A	A	0.00044043	5217.67	0	0.00169762	2596.67	0.000128353
EBT00001514621	ValV	69	Acc-stem	GAC	A	A	0.000462012	5217.67	0	0.00309573	2597	0
EBT00001514621	ValV	70	Acc-stem	GAC	C	C	0.00181495	5217.67	0	0.00469426	2597	0
EBT00001514621	ValV	71	Acc-stem	GAC	G	G	0.000957507	5217.67	0	0.00239838	2597	0
EBT00001514621	ValV	72	Acc-stem	GAC	C	C	0.00126506	5217.67	0	0.00248659	2597	0
EBT00001514621	ValV	73		GAC	A	A	0.00109693	5217.67	0	0.00264186	2596.67	0
EBT00001514621	ValV	74		GAC	C	C	0.000436527	5217.67	0	0.00246172	2596.67	0
EBT00001514621	ValV	75		GAC	C	C	0	5217.67	0	0	2596.33	0
EBT00001514621	ValV	76		GAC	A	A	0	4735.67	0	0	2206.33	0
EBT00001514583	ValW	1	Acc-stem	GAC	G	G	NA	1.33333	NA	NA	0.666667	NA
EBT00001514583	ValW	2	Acc-stem	GAC	C	C	NA	1.33333	NA	NA	0.666667	NA
EBT00001514583	ValW	3	Acc-stem	GAC	G	G	NA	1.33333	NA	NA	0.666667	NA
EBT00001514583	ValW	4	Acc-stem	GAC	T	U	NA	1.33333	NA	NA	0.666667	NA
EBT00001514583	ValW	5	Acc-stem	GAC	C	C	NA	1.33333	NA	NA	0.666667	NA
EBT00001514583	ValW	6	Acc-stem	GAC	C	C	NA	1.33333	NA	NA	0.666667	NA
EBT00001514583	ValW	7	Acc-stem	GAC	G	G	NA	1.33333	NA	NA	0.666667	NA
EBT00001514583	ValW	8		GAC	T	s4U	NA	1.33333	NA	NA	0.666667	NA
EBT00001514583	ValW	9		GAC	A	A	NA	1.33333	NA	NA	0.666667	NA
EBT00001514583	ValW	10	D-stem	GAC	G	G	NA	1.33333	NA	NA	0.666667	NA
EBT00001514583	ValW	11	D-stem	GAC	C	C	NA	1.33333	NA	NA	0.666667	NA
EBT00001514583	ValW	12	D-stem	GAC	T	U	NA	1.33333	NA	NA	0.666667	NA
EBT00001514583	ValW	13	D-stem	GAC	C	C	NA	1.33333	NA	NA	0.666667	NA
EBT00001514583	ValW	14	D-loop	GAC	A	A	NA	1.33333	NA	NA	6	NA
EBT00001514583	ValW	15	D-loop	GAC	G	G	NA	1.33333	NA	NA	6	NA
EBT00001514583	ValW	16	D-loop	GAC	T	DD	NA	1.33333	NA	NA	7	NA
EBT00001514583	ValW	17	D-loop	GAC	T	DD	NA	1.33333	NA	NA	7	NA
EBT00001514583	ValW	18	D-loop	GAC	G	G	NA	1.33333	NA	NA	7	NA
EBT00001514583	ValW	19	D-loop	GAC	G	G	NA	1.33333	NA	NA	7.33333	NA
EBT00001514583	ValW	20	D-loop	GAC	T	DD	NA	4.66667	NA	NA	7.33333	NA
EBT00001514583	ValW	20a	D-loop	GAC	T	DD	NA	6.33333	NA	NA	7.33333	NA
EBT00001514583	ValW	21	D-loop	GAC	A	A	NA	6.66667	NA	NA	7.33333	NA
EBT00001514583	ValW	22	D-stem	GAC	G	G	NA	7.66667	NA	NA	7.33333	NA
EBT00001514583	ValW	23	D-stem	GAC	A	A	NA	7.66667	NA	NA	7.33333	NA
EBT00001514583	ValW	24	D-stem	GAC	G	G	NA	7.66667	NA	NA	7.33333	NA
EBT00001514583	ValW	25	D-stem	GAC	C	C	NA	7.66667	NA	NA	7.33333	NA
EBT00001514583	ValW	26		GAC	A	A	NA	8.33333	NA	NA	7.33333	NA
EBT00001514583	ValW	27	Ac-Stem	GAC	C	C	NA	8.33333	NA	NA	7.33333	NA
EBT00001514583	ValW	28	Ac-Stem	GAC	C	C	NA	8.33333	NA	NA	7.33333	NA
EBT00001514583	ValW	29	Ac-Stem	GAC	A	A	NA	10.6667	NA	NA	7.33333	NA
EBT00001514583	ValW	30	Ac-Stem	GAC	C	C	NA	12	NA	NA	7.33333	NA
EBT00001514583	ValW	31	Ac-Stem	GAC	C	C	NA	15	NA	NA	7.33333	NA
EBT00001514583	ValW	32	Ac-loop	GAC	T	U	NA	27	NA	NA	13	NA
EBT00001514583	ValW	33	Ac-loop	GAC	T	U	NA	27.3333	NA	NA	7.66667	NA
EBT00001514583	ValW	34	Ac-loop	GAC	G	G	NA	29.3333	NA	NA	8	NA
EBT00001514583	ValW	35	Ac-loop	GAC	A	A	0	141.667	0.445893	NA	68	NA
EBT00001514583	ValW	36	Ac-loop	GAC	C	C	0	255.667	0.78969	0.00182149	109	0.801457
EBT00001514583	ValW	37	Ac-loop	GAC	A	A	0	1215.67	0.409966	0.00769601	549	0.453369
EBT00001514583	ValW	38	Ac-loop	GAC	T	U	0.000328046	2060.33	0.12438	0.00431582	1004.33	0.137665
EBT00001514583	ValW	39	Ac-stem	GAC	G	G	0.000577178	2353	0.0175365	0.000439464	1164.67	0.0149422
EBT00001514583	ValW	40	Ac-stem	GAC	G	G	0.000638072	2395	0.00346741	0.00486138	1182.33	0.00755456
EBT00001514583	ValW	41	Ac-stem	GAC	T	U	0.000748757	2403.33	0	0.00349039	1191.33	0
EBT00001514583	ValW	42	Ac-stem	GAC	G	G	0.00116764	2234	0.0819178	0.000583249	1167.33	0.0291101
EBT00001514583	ValW	43	Ac-stem	GAC	G	G	0.00109367	2433.33	0.0104378	0.00181285	1202.33	0.012322
EBT00001514583	ValW	44	V-region	GAC	G	G	0.000717931	2459	0.000947996	0.00367404	1217.33	0.000273748
EBT00001514583	ValW	45	V-region	GAC	G	G	0.000960913	2461.33	0.00685945	0.00143532	1217.67	0.00571584
EBT00001514583	ValW	46	V-region	GAC	G	m7G	0.00217043	2478.33	0.133147	0.00596594	1224.67	0.184099
EBT00001514583	ValW	47	V-region	GAC	T	acp3U	0.200697	2859	0.0668045	0.098458	1501	0.0563705
EBT00001514583	ValW	48	V-region	GAC	C	C	0.000686656	3063.67	0.00627095	0.00135946	1590.67	0.00271682
EBT00001514583	ValW	49	T-stem	GAC	G	G	0.000443853	3083	0.00387722	0.00211847	1595	0.00270946
EBT00001514583	ValW	50	T-stem	GAC	G	G	0.000873844	3095	0.0553464	0.00332472	1599.33	0.00166459
EBT00001514583	ValW	51	T-stem	GAC	T	U	0.00160673	3276.33	0.00111789	0.00342425	1602	0
EBT00001514583	ValW	52	T-stem	GAC	G	G	0.00175297	3280	0.000913798	0.0017778	1602	0
EBT00001514583	ValW	53	T-stem	GAC	G	G	0.000344086	3283	0.00333941	0.000330524	1602	0.0066143
EBT00001514583	ValW	54	T-loop	GAC	T	T	0.000541117	3294	0	0.0011366	1612.67	0
EBT00001514583	ValW	55	T-loop	GAC	T	Y	0.000202021	3294	0	0.000980422	1612.67	0
EBT00001514583	ValW	56	T-loop	GAC	C	C	0	3294	0	0.000425515	1612.67	0
EBT00001514583	ValW	57	T-loop	GAC	G	G	0	3294	0	0	1612.67	0
EBT00001514583	ValW	58	T-loop	GAC	A	A	0.00022283	3294	0	0.00016469	1612.67	0
EBT00001514583	ValW	59	T-loop	GAC	G	G	0.00022283	3294	0	0.000988142	1612.67	0
EBT00001514583	ValW	60	T-loop	GAC	T	U	0.000597769	3294	0	0.00181522	1612.67	0
EBT00001514583	ValW	61	T-stem	GAC	C	C	0.00113889	3294	0	0.00138147	1612.33	0.000206697
EBT00001514583	ValW	62	T-stem	GAC	C	C	0.00116799	3294	0	0.00567811	1612.67	0
EBT00001514583	ValW	63	T-stem	GAC	A	A	0.000607515	3293.67	0.000101194	0.00116418	1612.67	0
EBT00001514583	ValW	64	T-stem	GAC	C	C	0.000617172	3294	0	0.00112037	1612.67	0
EBT00001514583	ValW	65	T-stem	GAC	T	U	0.000693293	3293.67	0.000101194	0.00281187	1612.67	0
EBT00001514583	ValW	66	Acc-stem	GAC	C	C	0.00144029	3294	0	0.00172681	1612.67	0
EBT00001514583	ValW	67	Acc-stem	GAC	G	G	0.0014805	3294	0	0.00171057	1612.67	0
EBT00001514583	ValW	68	Acc-stem	GAC	G	G	0.000799791	3294	0	0.00236161	1612.67	0
EBT00001514583	ValW	69	Acc-stem	GAC	A	A	0.000808086	3294	0	0.00534021	1612.67	0
EBT00001514583	ValW	70	Acc-stem	GAC	C	C	0.00222898	3294	0	0.00920752	1612.67	0
EBT00001514583	ValW	71	Acc-stem	GAC	G	G	0.00164949	3294	0	0.00144975	1612.67	0
EBT00001514583	ValW	72	Acc-stem	GAC	C	C	0.00127455	3294	0	0.00135361	1612.67	0
EBT00001514583	ValW	73		GAC	A	A	0.000489799	3294	0	0.00431394	1612.67	0
EBT00001514583	ValW	74		GAC	C	C	0.000870511	3294	0	0.0013897	1612.33	0.000206697
EBT00001514583	ValW	75		GAC	C	C	0	3294	0	0	1612.67	0
EBT00001514583	ValW	76		GAC	A	A	0	3128	0	0	1381.67	0
EBT00001514719	ValT	1	Acc-stem	UAC	G	G	0	4166	0.0126402	0	3160.67	0.011777
EBT00001514719	ValT	2	Acc-stem	UAC	G	G	0	4219.33	0.00807147	0	3198.33	0.00415153
EBT00001514719	ValT	3	Acc-stem	UAC	G	G	0.000321292	4253.67	0.0041361	0.00134052	3211.67	0.0127062
EBT00001514719	ValT	4	Acc-stem	UAC	T	U	0.000892886	4271.33	0.000623928	0.00338199	3253	0.00489446
EBT00001514719	ValT	5	Acc-stem	UAC	G	G	0.000908811	4274	0.0104191	0.000231778	3269	0.016349
EBT00001514719	ValT	6	Acc-stem	UAC	A	A	0.000833881	4319	0.010236	0.000855727	3323.33	0.0317568
EBT00001514719	ValT	7	Acc-stem	UAC	T	U	0.00113437	4363.67	0.00743043	0.00270893	3432.33	0.0135083
EBT00001514719	ValT	8		UAC	T	s4U	0.154273	4396.33	0.048344	0.085363	3479.33	0.117369
EBT00001514719	ValT	9		UAC	A	A	0.000194457	4619.67	0.00115315	0.00391281	3942	0.0022779
EBT00001514719	ValT	10	D-stem	UAC	G	G	0.0075537	4625	0.00935313	0.00940032	3951	0.0152044
EBT00001514719	ValT	11	D-stem	UAC	C	C	0.00132912	4668.67	0.00751134	0.00159626	4012	0.054071
EBT00001514719	ValT	12	D-stem	UAC	T	U	0.000714189	4704	0.000424989	0.00249007	4241.33	0.00117749
EBT00001514719	ValT	13	D-stem	UAC	C	C	0.001834	4706	0.00402116	0.00191599	4246.33	0.0175831
EBT00001514719	ValT	14	D-loop	UAC	A	A	0.000569554	4725	0.000352609	0.00104272	4322.33	0
EBT00001514719	ValT	15	D-loop	UAC	G	G	0.00151934	4726.67	0.00922303	0.00891614	4322.33	0.0182465
EBT00001514719	ValT	16	D-loop	UAC	C	C	0.00163197	4770.67	0.00831486	0.00193808	4402.67	0.0152837
EBT00001514719	ValT	17	D-loop	UAC	T	D	0.00117535	4810.67	0.000761614	0.00228904	4471	0.00200893
EBT00001514719	ValT	18	D-loop	UAC	G	G	0.000976045	4814.33	0.00830816	0.00213677	4480	0.00451818
EBT00001514719	ValT	19	D-loop	UAC	G	G	0.00170193	4854.67	0.00992522	0.00465057	4500.33	0.00302762
EBT00001514719	ValT	20	D-loop	UAC	G	G	0.00192078	4903.33	0.0135461	0.0015014	4514	0.00834798
EBT00001514719	ValT	21	D-loop	UAC	A	A	0.000491972	4970.67	0.00300863	0.00111862	4552	0.000877963
EBT00001514719	ValT	22	D-stem	UAC	G	G	0.00188061	4985.67	0.0129347	0.00179218	4556	0.00625273
EBT00001514719	ValT	23	D-stem	UAC	A	A	0.000574522	5051	0.00296092	0.00145692	4584.67	0.00101685
EBT00001514719	ValT	24	D-stem	UAC	G	G	0.00105751	5066	0.00970874	0.00271105	4589.33	0.00441102
EBT00001514719	ValT	25	D-stem	UAC	C	C	0.00196778	5115.67	0.013245	0.00255384	4609.67	0.00973863
EBT00001514719	ValT	26		UAC	A	A	0.000344054	5184.33	0.004608	0.000588711	4655	0
EBT00001514719	ValT	27	Ac-Stem	UAC	C	C	0.00141003	5208.33	0.0049672	0.203765	4655	0.00321199
EBT00001514719	ValT	28	Ac-Stem	UAC	C	C	0.0021256	5234.33	0.00814805	0.00388537	4670	0.0058189
EBT00001514719	ValT	29	Ac-Stem	UAC	T	U	0.00105339	5277.33	0.000631234	0.00311856	4697.33	0.000850822
EBT00001514719	ValT	30	Ac-Stem	UAC	C	C	0.000842796	5280.67	0.00308351	0.203589	4701.33	0.00521935
EBT00001514719	ValT	31	Ac-Stem	UAC	C	C	0.00100794	5297	0.00699869	0.00293411	4726	0.00867012
EBT00001514719	ValT	32	Ac-loop	UAC	C	C	0.00104218	5334.33	0.139439	0.00165569	4767.33	0.103323
EBT00001514719	ValT	33	Ac-loop	UAC	T	U	0.00164954	6198.67	0.0411467	0.00380248	5316.67	0.0462238
EBT00001514719	ValT	34	Ac-loop	UAC	T	cmo5U	0.00204467	6464.67	0.0194651	0.0043697	5574.33	0.0115262
EBT00001514719	ValT	35	Ac-loop	UAC	A	A	0.00308582	6593	0.102179	0.00881626	5639.33	0.106569
EBT00001514719	ValT	36	Ac-loop	UAC	C	C	0.0213841	7343.33	0.259047	0.0280204	6312	0.225236
EBT00001514719	ValT	37	Ac-loop	UAC	A	m6A	0.000805415	9910.67	0.172295	0.000766159	8147	0.226036
EBT00001514719	ValT	38	Ac-loop	UAC	A	A	0.00073355	11973.7	0.229345	0.000568702	10526.3	0.215955
EBT00001514719	ValT	39	Ac-stem	UAC	G	G	0.00137474	15537	0.100643	0.00286766	13425.7	0.115976
EBT00001514719	ValT	40	Ac-stem	UAC	G	G	0.000951208	17275.7	0.0123111	0.0760412	15187	0.0143219
EBT00001514719	ValT	41	Ac-stem	UAC	A	A	0.000171864	17491	0.00572241	0.000701895	15407.7	0.00224491
EBT00001514719	ValT	42	Ac-stem	UAC	G	G	0.00183395	17591.7	0.00540877	0.00289746	15442.3	0.00228286
EBT00001514719	ValT	43	Ac-stem	UAC	G	G	0.00150447	17687.3	0.00375502	0.0779591	15477.7	0.0291264
EBT00001514719	ValT	44	V-region	UAC	G	G	0.000951553	17754	0.00131253	0.00247268	15942	0.00139895
EBT00001514719	ValT	45	V-region	UAC	G	G	0.00100743	17777.3	0.00295382	0.00283923	15964.3	0.00108458
EBT00001514719	ValT	46	V-region	UAC	G	m7G	0.00261132	17830	0.0254168	0.00530884	15981.7	0.0301798
EBT00001514719	ValT	47	V-region	UAC	T	U	0.00180964	18295	0.00247178	0.00544915	16479	0.0013736
EBT00001514719	ValT	48	V-region	UAC	C	C	0.00100061	18340.3	0.0077546	0.00250915	16501.7	0.0129205
EBT00001514719	ValT	49	T-stem	UAC	G	G	0.00235515	18483.7	0.00178218	0.00414183	16717.7	0.00238697
EBT00001514719	ValT	50	T-stem	UAC	G	G	0.00101291	18516.7	0.00267509	0.00367056	16757.7	0.00172756
EBT00001514719	ValT	51	T-stem	UAC	C	C	0.00129167	18566.3	0.000627983	0.00290327	16786.7	0.000793651
EBT00001514719	ValT	52	T-stem	UAC	G	G	0.00147097	18578	0.00134387	0.00317938	16800	0.000396668
EBT00001514719	ValT	53	T-stem	UAC	G	G	0.00113048	18603	0.00509849	0.00278236	16806.7	0.00697207
EBT00001514719	ValT	54	T-loop	UAC	T	T	0.00113625	18698.3	3.57e-05	0.00327207	16924.7	5.90819e-05
EBT00001514719	ValT	55	T-loop	UAC	T	Y	0.00058981	18699	0	0.00224503	16925.7	0
EBT00001514719	ValT	56	T-loop	UAC	C	C	0.000734984	18699	0	0.00115864	16925.7	0
EBT00001514719	ValT	57	T-loop	UAC	G	G	0.000475716	18699	0	0.0010626	16925.7	0
EBT00001514719	ValT	58	T-loop	UAC	A	A	0.000415829	18699	0	0.000983666	16925.7	0
EBT00001514719	ValT	59	T-loop	UAC	T	U	0.000826612	18698.7	0	0.00278121	16925.7	0
EBT00001514719	ValT	60	T-loop	UAC	C	C	0.00138834	18697.7	7.13e-05	0.00385813	16923.7	0.000118164
EBT00001514719	ValT	61	T-stem	UAC	C	C	0.00123611	18699	0	0.0035088	16925.7	0
EBT00001514719	ValT	62	T-stem	UAC	C	C	0.00160772	18699	0	0.00411737	16925.3	0
EBT00001514719	ValT	63	T-stem	UAC	G	G	0.00126773	18696	0.000142613	0.00471916	16925.3	1.96943e-05
EBT00001514719	ValT	64	T-stem	UAC	T	U	0.00172366	18698.7	0	0.00513729	16925.7	0
EBT00001514719	ValT	65	T-stem	UAC	C	C	0.00105839	18698.3	3.57e-05	0.00188101	16925	0
EBT00001514719	ValT	66	Acc-stem	UAC	A	A	0.000671497	18699	0	0.00222398	16924.7	3.93883e-05
EBT00001514719	ValT	67	Acc-stem	UAC	T	U	0.00109211	18699	0	0.00534807	16925.3	0
EBT00001514719	ValT	68	Acc-stem	UAC	C	C	0.00175332	18698.3	0	0.00348203	16925	0
EBT00001514719	ValT	69	Acc-stem	UAC	A	A	0.000974144	18698	0	0.00534656	16923.3	0
EBT00001514719	ValT	70	Acc-stem	UAC	C	C	0.00142824	18695	0.000213915	0.00296252	16920	0.000315109
EBT00001514719	ValT	71	Acc-stem	UAC	C	C	0.00300942	18699	0	0.00782138	16925.3	0
EBT00001514719	ValT	72	Acc-stem	UAC	C	C	0.0016294	18698.7	0	0.00364611	16924.7	0
EBT00001514719	ValT	73		UAC	A	A	0.00127908	18698.3	1.78e-05	0.00585511	16923.7	3.93906e-05
EBT00001514719	ValT	74		UAC	C	C	0.000243714	18698.7	0	0.00109762	16924.3	5.9083e-05
EBT00001514719	ValT	75		UAC	C	C	0	18698.7	0	0	16925.3	0
EBT00001514719	ValT	76		UAC	A	A	0	17988.3	0	0	15741.3	0
EBT00001514729	GlyU	1	Acc-stem	CCC	G	G	0	332.333	0.0673527	NA	88	NA
EBT00001514729	GlyU	2	Acc-stem	CCC	C	C	0	356.333	0.00372787	NA	88.6667	NA
EBT00001514729	GlyU	3	Acc-stem	CCC	G	G	0	357.667	0	NA	88.6667	NA
EBT00001514729	GlyU	4	Acc-stem	CCC	G	G	0.0010225	357.667	0.000931099	NA	88.6667	NA
EBT00001514729	GlyU	5	Acc-stem	CCC	G	G	0.00211586	358	0	NA	88.6667	NA
EBT00001514729	GlyU	6	Acc-stem	CCC	C	C	0.000752445	358	0	NA	88.6667	NA
EBT00001514729	GlyU	7	Acc-stem	CCC	G	G	0.00287534	357	0.00833333	NA	88.6667	NA
EBT00001514729	GlyU	8		CCC	T	s4U	0.112244	360	0.0046083	NA	90.3333	NA
EBT00001514729	GlyU	9		CCC	A	A	0.00183559	361.667	0.00092081	NA	90.3333	NA
EBT00001514729	GlyU	10	D-stem	CCC	G	G	0.0020202	362	0.0320856	NA	90.3333	NA
EBT00001514729	GlyU	11	D-stem	CCC	T	U	0.00489695	374	0.0035524	NA	98	NA
EBT00001514729	GlyU	12	D-stem	CCC	T	U	0.0021164	375.333	0	0.00438597	106	0
EBT00001514729	GlyU	13	D-stem	CCC	C	C	0.00142146	375.333	0	0.00821498	106	0
EBT00001514729	GlyU	14	D-loop	CCC	A	A	0	375.333	0.00177305	0.0123457	106	0
EBT00001514729	GlyU	15	D-loop	CCC	A	A	0	376	0.00088574	0	106	0
EBT00001514729	GlyU	16	D-loop	CCC	T	U	0.0023931	376.333	0	0	106	0
EBT00001514729	GlyU	18	D-loop	CCC	G	G	0.0027354	376.333	0	0	106	0
EBT00001514729	GlyU	19	D-loop	CCC	G	G	0	376.333	0.0113835	0	106	0.00625
EBT00001514729	GlyU	20	D-loop	CCC	T	D	0	380.667	0.00174825	0.00292398	106.667	0
EBT00001514729	GlyU	21	D-loop	CCC	A	A	0	381.333	0.00780572	0	106.667	0
EBT00001514729	GlyU	22	D-stem	CCC	G	G	0.000698812	384.333	0.00689061	0.00292398	106.667	0
EBT00001514729	GlyU	23	D-stem	CCC	A	A	0	387	0.00938567	0.00292398	106.667	0.0615836
EBT00001514729	GlyU	24	D-stem	CCC	A	A	0	390.667	0.00170358	0	113.667	0
EBT00001514729	GlyU	25	D-stem	CCC	C	C	0.00092081	391.333	0.000851064	0.00913242	113.667	0
EBT00001514729	GlyU	26		CCC	G	G	0.00584055	391.667	0.00843882	0.00438597	113.667	0.00292398
EBT00001514729	GlyU	27	Ac-Stem	CCC	A	A	0	395	0.00420168	0.00292398	114	0.293388
EBT00001514729	GlyU	28	Ac-Stem	CCC	G	G	0.00136612	396.667	0.00083963	0	161.333	0
EBT00001514729	GlyU	29	Ac-Stem	CCC	A	A	0	397	0.000838926	0	161.333	0
EBT00001514729	GlyU	30	Ac-Stem	CCC	G	G	0	397.333	0.00334448	0.00362319	161.333	0
EBT00001514729	GlyU	31	Ac-Stem	CCC	C	C	0.000900901	398.667	0.204258	0	160.333	0.097561
EBT00001514729	GlyU	32	Ac-loop	CCC	T	U	0.00326112	501	0.0278137	0.00359103	177.667	0.0549645
EBT00001514729	GlyU	33	Ac-loop	CCC	T	U	0.00376588	515.333	0.030721	0.000966184	188	0
EBT00001514729	GlyU	34	Ac-loop	CCC	C	C	0.0140771	531.667	0.166231	0.022797	187.333	0.124611
EBT00001514729	GlyU	35	Ac-loop	CCC	C	C	0.0119971	637.667	0.52007	0.0035461	214	0.53343
EBT00001514729	GlyU	36	Ac-loop	CCC	C	C	0.00343183	1328.67	0.655934	0.0083632	458.667	0.651734
EBT00001514729	GlyU	37	Ac-loop	CCC	A	A	0.000554455	3861.67	0.275122	0.00030303	1317	0.353778
EBT00001514729	GlyU	38	Ac-loop	CCC	A	A	0.000260191	5327.33	0.127858	0.000155473	2038	0.175789
EBT00001514729	GlyU	39	Ac-stem	CCC	G	G	0.000572907	6108.33	0.0251623	0.000728702	2472.67	0.0465296
EBT00001514729	GlyU	40	Ac-stem	CCC	C	C	0.000758874	6266	0.00392115	0.0007839	2593.33	0.0113102
EBT00001514729	GlyU	41	Ac-stem	CCC	T	U	0.000428212	6290.67	0.00105865	0.00178729	2623	0.00291434
EBT00001514729	GlyU	42	Ac-stem	CCC	C	C	0.00112423	6297.33	0.00709518	0.00233063	2630.67	0
EBT00001514729	GlyU	43	Ac-stem	CCC	T	U	0.000537118	6342.33	0.0028823	0.00565222	2585	0.0290472
EBT00001514729	GlyU	44	V-region	CCC	A	A	0.000404162	6360.67	0.00562793	0.00225144	2662.33	0.0134634
EBT00001514729	GlyU	45	V-region	CCC	T	U	0.00219307	6396.67	0.00270242	0.0113331	2698.67	0.0482013
EBT00001514729	GlyU	46	V-region	CCC	A	A	0.000289567	6414	0.000727046	0.000241822	2835.33	0.000587475
EBT00001514729	GlyU	48	V-region	CCC	C	C	0.000891421	6418.67	0.000985733	0.00209811	2837	0.00129078
EBT00001514729	GlyU	49	T-stem	CCC	G	G	0.00197661	6425	0.00145055	0.00436506	2840.67	0.00128911
EBT00001514729	GlyU	50	T-stem	CCC	A	A	0.000353517	6434.33	0.00025896	0.00119163	2844.33	0.000936659
EBT00001514729	GlyU	51	T-stem	CCC	G	G	0.00116988	6436	0.000776277	0.00205198	2847	0.000117068
EBT00001514729	GlyU	52	T-stem	CCC	G	G	0.00136536	6441	0.000413843	0.00240918	2847.33	0.000935673
EBT00001514729	GlyU	53	T-stem	CCC	G	G	0.000940409	6443.67	0.00319703	0.00267144	2850	0.00616064
EBT00001514729	GlyU	54	T-loop	CCC	T	T	0.000254109	6464.33	0	0.00142685	2867.67	0
EBT00001514729	GlyU	55	T-loop	CCC	T	Y	0.000254082	6464.33	0	0.00047129	2867.67	0
EBT00001514729	GlyU	56	T-loop	CCC	C	C	0.000299874	6464.33	0	0	2867.67	0
EBT00001514729	GlyU	57	T-loop	CCC	G	G	0.000110385	6464.33	0	0.000138141	2867.67	0
EBT00001514729	GlyU	58	T-loop	CCC	A	A	0.000162471	6464.33	0	0.000338401	2867.67	0
EBT00001514729	GlyU	59	T-loop	CCC	T	U	0.000847701	6464	5.16e-05	0.00216392	2867.67	0
EBT00001514729	GlyU	60	T-loop	CCC	T	U	0.000753948	6464.33	0	0.0027001	2867.67	0
EBT00001514729	GlyU	61	T-stem	CCC	C	C	0.00142668	6464	5.16e-05	0.00341007	2867.33	0.000116239
EBT00001514729	GlyU	62	T-stem	CCC	C	C	0.00112669	6464.33	0	0.00319302	2867.67	0
EBT00001514729	GlyU	63	T-stem	CCC	C	C	0.0012767	6464.33	0	0.00230483	2867.67	0
EBT00001514729	GlyU	64	T-stem	CCC	T	U	0.00123773	6461.33	0.000206313	0.0033204	2864	0.00127862
EBT00001514729	GlyU	65	T-stem	CCC	T	U	0.00106868	6462.67	5.16e-05	0.00246183	2867.67	0
EBT00001514729	GlyU	66	Acc-stem	CCC	C	C	0.00101458	6463	0	0.00249966	2864	0.00127862
EBT00001514729	GlyU	67	Acc-stem	CCC	G	G	0.00355225	6462.67	0.000154711	0.00693493	2867.67	0
EBT00001514729	GlyU	68	Acc-stem	CCC	C	C	0.00177872	6463.67	0	0.00155755	2867	0.000232477
EBT00001514729	GlyU	69	Acc-stem	CCC	C	C	0.0112853	6463.67	0.00010313	0.0133611	2867.67	0
EBT00001514729	GlyU	70	Acc-stem	CCC	C	C	0.00363859	6464.33	0	0.00476327	2867.67	0
EBT00001514729	GlyU	71	Acc-stem	CCC	G	G	0.00261175	6459.33	0.000721947	0.00618776	2867.33	0
EBT00001514729	GlyU	72	Acc-stem	CCC	C	C	0.000612341	6464	0	0.00112661	2867.33	0
EBT00001514729	GlyU	73		CCC	T	U	0.00142679	6463.67	5.16e-05	0.00531365	2867.33	0
EBT00001514729	GlyU	74		CCC	C	C	0.000404071	6464	0	0.00166035	2867	0.000232477
EBT00001514729	GlyU	75		CCC	C	C	0	6464	0	0	2867.67	0
EBT00001514729	GlyU	76		CCC	A	A	0	6142.33	0	0	2470.33	0
EBT00001514735	GlyV	1	Acc-stem	GCC	G	G	0	3121.33	0.0374178	0	2686.33	0.0218473
EBT00001514735	GlyV	2	Acc-stem	GCC	C	C	0	3242.67	0.00368701	0	2746.33	0.00169635
EBT00001514735	GlyV	3	Acc-stem	GCC	G	G	0.000163119	3254.67	0.00285948	0.000156055	2751	0.000847458
EBT00001514735	GlyV	4	Acc-stem	GCC	G	G	0.00103103	3264	0.000306279	0.00220582	2753.33	0.000121051
EBT00001514735	GlyV	5	Acc-stem	GCC	G	G	0.000749788	3265	0.000408205	0.000798022	2753.67	0.00373854
EBT00001514735	GlyV	6	Acc-stem	GCC	A	A	0.000355492	3266.33	0.00305219	0.000155909	2764	0.00420319
EBT00001514735	GlyV	7	Acc-stem	GCC	A	A	0.00101893	3276.33	0.00182797	0.000715187	2775.67	0.00478069
EBT00001514735	GlyV	8		GCC	T	s4U	0.0159451	3282.33	0.00323919	0.0396824	2789	0.0181882
EBT00001514735	GlyV	9		GCC	A	A	0.00023297	3293	0.000202409	0	2840.67	0
EBT00001514735	GlyV	10	D-stem	GCC	G	G	0.000716854	3293.67	0.00161665	0.000851044	2840.67	0
EBT00001514735	GlyV	11	D-stem	GCC	C	C	0.000948479	3299	0.00292162	0.00218152	2840.67	0.0127433
EBT00001514735	GlyV	12	D-stem	GCC	T	U	0.000554262	3308.67	0.000302145	0.00232764	2877.33	0
EBT00001514735	GlyV	13	D-stem	GCC	C	C	0.0016427	3309.67	0.00130758	0.00215408	2877.33	0
EBT00001514735	GlyV	14	D-loop	GCC	A	A	0.000231594	3314	0.0011052	0.000316033	2877.33	0
EBT00001514735	GlyV	15	D-loop	GCC	G	G	0.000196618	3317.67	0.020374	0.000396071	2877.33	0.0348837
EBT00001514735	GlyV	16	D-loop	GCC	T	DD	0.000505028	3386.67	0.000983284	0.00331082	2981.33	0
EBT00001514735	GlyV	17	D-loop	GCC	T	DD	0.000233699	3390	0.00176678	0.00195467	2981.33	0.00334299
EBT00001514735	GlyV	18	D-loop	GCC	G	G	0.000989108	3396	0.00352113	0.00172352	2991.33	0.000111421
EBT00001514735	GlyV	19	D-loop	GCC	G	G	0.000635287	3408	0.0394588	0.000733776	2991.67	0.0099283
EBT00001514735	GlyV	20	D-loop	GCC	T	D	0.000580679	3548	0.00262369	0.00220886	3021.67	0.00176192
EBT00001514735	GlyV	21	D-loop	GCC	A	A	0.00037048	3557.33	0.00642398	0.00100545	3027	0.00307388
EBT00001514735	GlyV	22	D-stem	GCC	G	G	0.0012636	3580.33	0.00748475	0.000497711	3036.33	0.00262783
EBT00001514735	GlyV	23	D-stem	GCC	A	A	0.000503571	3607.33	0.00129199	0.000672043	3044.33	0
EBT00001514735	GlyV	24	D-stem	GCC	G	G	0.000903939	3612	0.0047759	0.000733986	3044.33	0.00857577
EBT00001514735	GlyV	25	D-stem	GCC	C	C	0.00132696	3629.33	0.0200702	0.0007866	3070.67	0.0137045
EBT00001514735	GlyV	26		GCC	A	A	0.000243873	3703.67	0.0108609	0.00118553	3113.33	0.00096267
EBT00001514735	GlyV	27	Ac-Stem	GCC	C	C	0.00218758	3744.33	0.00222064	0.00235988	3116.33	0.0033049
EBT00001514735	GlyV	28	Ac-Stem	GCC	G	G	0.000918347	3752.67	0.016339	0.000899843	3126.67	0.0065664
EBT00001514735	GlyV	29	Ac-Stem	GCC	A	A	0.000501417	3815	0.0040898	0.000694985	3147.33	0
EBT00001514735	GlyV	30	Ac-Stem	GCC	C	C	0.000338491	3830.67	0.0561761	0.00188077	3147.33	0.0457807
EBT00001514735	GlyV	31	Ac-Stem	GCC	C	C	0.00111391	4058.67	0.178019	0.00133252	3298.33	0.0895289
EBT00001514735	GlyV	32	Ac-loop	GCC	T	U	0.00122899	4937.67	0.0217276	0.00257889	3622.67	0
EBT00001514735	GlyV	33	Ac-loop	GCC	T	U	0.00164898	5047.33	0.0986905	0.00353824	3544	0.0717653
EBT00001514735	GlyV	34	Ac-loop	GCC	G	G	0.067868	5600	0.785911	0.0848942	3818	0.677434
EBT00001514735	GlyV	35	Ac-loop	GCC	C	C	0.00451544	26157.3	0.717437	0.00325998	11836.3	0.75813
EBT00001514735	GlyV	36	Ac-loop	GCC	C	C	0.000192734	92571.7	0.30483	0.000120263	48936.7	0.322923
EBT00001514735	GlyV	37	Ac-loop	GCC	A	A	0.000120527	133164	0.076906	8.07e-05	72276.3	0.0987764
EBT00001514735	GlyV	38	Ac-loop	GCC	A	A	0.000170412	144258	0.032518	0.000199739	80198	0.0483284
EBT00001514735	GlyV	39	Ac-stem	GCC	G	G	0.000878397	149107	0.00390359	0.000668483	84270.7	0.00494747
EBT00001514735	GlyV	40	Ac-stem	GCC	G	G	0.00090691	149691	0.00456186	0.00120323	84689.7	0.00728703
EBT00001514735	GlyV	41	Ac-stem	GCC	T	U	0.000735303	150377	0.00020389	0.00274465	85311.3	0.000238286
EBT00001514735	GlyV	42	Ac-stem	GCC	C	C	0.00112676	150408	0	0.00167174	85331.7	0
EBT00001514735	GlyV	43	Ac-stem	GCC	G	G	0.00148085	150145	0.00219969	0.00222294	85266.3	0.0010505
EBT00001514735	GlyV	44	V-region	GCC	G	G	0.00129519	150476	0.000650844	0.00176238	85356	0.000854511
EBT00001514735	GlyV	45	V-region	GCC	G	G	0.000912558	150574	0.000776425	0.00232247	85429	0.000635601
EBT00001514735	GlyV	46	V-region	GCC	G	m7G	0.00222745	150691	0.00477719	0.00323664	85483.3	0.00493941
EBT00001514735	GlyV	47	V-region	GCC	T	U	0.00363599	151414	0.00071057	0.00473784	85907.7	0.00052742
EBT00001514735	GlyV	48	V-region	GCC	C	C	0.000992053	151522	0.000430995	0.00164961	85953	0.000476777
EBT00001514735	GlyV	49	T-stem	GCC	G	G	0.00149628	151587	0.00069878	0.00220591	85994	0.0010571
EBT00001514735	GlyV	50	T-stem	GCC	C	C	0.000978954	151693	0.000166976	0.00165813	86085	7.74369e-05
EBT00001514735	GlyV	51	T-stem	GCC	G	G	0.000625746	151718	0.000426047	0.00125192	86091.7	0.000232257
EBT00001514735	GlyV	52	T-stem	GCC	A	A	0.000342443	151783	9.66e-05	0.000808558	86111.7	3.87079e-05
EBT00001514735	GlyV	53	T-stem	GCC	G	G	0.000539573	151798	0.00121943	0.0015597	86115	0.00225159
EBT00001514735	GlyV	54	T-loop	GCC	T	T	0.000691205	151983	1.32e-05	0.00235082	86309.3	1.54481e-05
EBT00001514735	GlyV	55	T-loop	GCC	T	Y	0.000172788	151985	2.19e-06	0.00068944	86310.7	0
EBT00001514735	GlyV	56	T-loop	GCC	C	C	0.000979113	151985	0	0.00325588	86310	0
EBT00001514735	GlyV	57	T-loop	GCC	G	G	0.000785187	151980	6.58e-06	0.00163734	86297.7	0
EBT00001514735	GlyV	58	T-loop	GCC	A	A	0.00035956	151981	0	0.00140078	86297.7	3.86255e-06
EBT00001514735	GlyV	59	T-loop	GCC	G	G	0.00156236	151981	1.54e-05	0.00427319	86298	0.000131311
EBT00001514735	GlyV	60	T-loop	GCC	T	U	0.00110012	151983	4.39e-06	0.00314124	86309.3	3.86214e-06
EBT00001514735	GlyV	61	T-stem	GCC	C	C	0.0010628	151984	0	0.00365555	86309.7	0
EBT00001514735	GlyV	62	T-stem	GCC	T	U	0.00195532	151982	0	0.00775514	86301	0
EBT00001514735	GlyV	63	T-stem	GCC	C	C	0.00156674	151957	0	0.00507581	86290	3.86289e-06
EBT00001514735	GlyV	64	T-stem	GCC	G	G	0.00162949	151956	0.000103089	0.00479399	86290.3	0.000177663
EBT00001514735	GlyV	65	T-stem	GCC	T	U	0.00227637	151971	8.33e-05	0.0068436	86305.7	5.02066e-05
EBT00001514735	GlyV	66	Acc-stem	GCC	T	U	0.0019887	151984	6.58e-06	0.00541684	86310	0
EBT00001514735	GlyV	67	Acc-stem	GCC	T	U	0.000926783	151985	0	0.00302524	86309.3	0
EBT00001514735	GlyV	68	Acc-stem	GCC	C	C	0.00417602	151968	9.43e-05	0.0188434	86293.3	0.000150626
EBT00001514735	GlyV	69	Acc-stem	GCC	C	C	0.00249638	151982	0	0.00621313	86306.3	1.15865e-05
EBT00001514735	GlyV	70	Acc-stem	GCC	C	C	0.00254093	151982	0	0.00562404	86307.3	0
EBT00001514735	GlyV	71	Acc-stem	GCC	G	G	0.00289109	151930	0.00031145	0.00820489	86288.7	0.000208559
EBT00001514735	GlyV	72	Acc-stem	GCC	C	C	0.00130113	151977	1.1e-05	0.00211685	86306.7	0
EBT00001514735	GlyV	73		GCC	T	U	0.00403516	151979	1.32e-05	0.0146403	86304	1.93112e-05
EBT00001514735	GlyV	74		GCC	C	C	0.00136162	151981	0	0.00738333	86305.7	0
EBT00001514735	GlyV	75		GCC	C	C	0	148460	0	0	83234.3	0
EBT00001514735	GlyV	76		GCC	A	A	0	138962	0	0	69961.7	0
EBT00001514622	GlyT	1	Acc-stem	UCC	G	G	0	1394.33	0.0606333	0	1198.33	0.024688
EBT00001514622	GlyT	2	Acc-stem	UCC	C	C	0	1484.33	0.00313409	0	1228.67	0.0157543
EBT00001514622	GlyT	3	Acc-stem	UCC	G	G	0.000176741	1489	0.00290179	0.00115933	1248.33	0.00133333
EBT00001514622	GlyT	4	Acc-stem	UCC	G	G	0.000175623	1493.33	0.00044623	0.00276838	1250	0
EBT00001514622	GlyT	5	Acc-stem	UCC	G	G	0.000243309	1494	0.00111433	0.00121265	1250	0
EBT00001514622	GlyT	6	Acc-stem	UCC	C	C	0.000449603	1495.67	0.00244553	0.00130673	1250	0.00292475
EBT00001514622	GlyT	7	Acc-stem	UCC	A	A	0.000174886	1499.33	0.00199689	0.000934587	1253.67	0.0185282
EBT00001514622	GlyT	8		UCC	T	U	0.00228944	1502.33	0	0.00113502	1277.33	0
EBT00001514622	GlyT	9		UCC	C	C	0.00106058	1502.33	0.000665188	0.00218846	1277.33	0
EBT00001514622	GlyT	10	D-stem	UCC	G	G	0.00227009	1503.33	0.00879121	0.00338645	1277.33	0.00725389
EBT00001514622	GlyT	11	D-stem	UCC	T	U	0.00119335	1516.67	0.00197412	0.00513465	1286.67	0
EBT00001514622	GlyT	12	D-stem	UCC	A	A	0.000412949	1519.67	0.00653737	0.000451988	1286.67	0
EBT00001514622	GlyT	13	D-stem	UCC	T	U	0.00115546	1529.67	0	0.00299254	1286.67	0
EBT00001514622	GlyT	14	D-loop	UCC	A	A	0.00128618	1529.67	0.00498699	0.0010989	1286.67	0.0010352
EBT00001514622	GlyT	15	D-loop	UCC	A	A	0.00017094	1537.33	0.00474752	0.000451371	1288	0
EBT00001514622	GlyT	16	D-loop	UCC	T	U	0.00101052	1544.67	0	0.00403357	1288	0
EBT00001514622	GlyT	18	D-loop	UCC	G	G	0.00246741	1544.67	0.00107782	0.00149396	1288	0
EBT00001514622	GlyT	19	D-loop	UCC	G	G	0.00213837	1546.33	0.002151	0.00149244	1288	0
EBT00001514622	GlyT	20	D-loop	UCC	C	C	0.00154326	1549.67	0.0208509	0.00104412	1288	0.0222672
EBT00001514622	GlyT	20a	D-loop	UCC	T	U	0.00117184	1582.67	0.0194135	0.00125062	1317.33	0.00952381
EBT00001514622	GlyT	21	D-loop	UCC	A	A	0	1614	0.0428939	0.000668896	1330	0.0493209
EBT00001514622	GlyT	22	D-stem	UCC	T	U	0.00128442	1686.33	0.0229818	0.00271814	1399	0.0214502
EBT00001514622	GlyT	23	D-stem	UCC	T	U	0.00154935	1726	0.0093744	0.00195106	1429.67	0.00763535
EBT00001514622	GlyT	24	D-stem	UCC	A	A	0.00406291	1742.33	0.0206108	0.00185235	1440.67	0.0546807
EBT00001514622	GlyT	25	D-stem	UCC	C	C	0.00142778	1779	0.0312216	0.00145576	1524	0.0338123
EBT00001514622	GlyT	26		UCC	C	C	0.000662009	1836.33	0.096589	0.00307807	1577.33	0.126776
EBT00001514622	GlyT	27	Ac-Stem	UCC	T	U	0.00102975	2032.67	0.00538248	0.00187359	1806.33	0.00932358
EBT00001514622	GlyT	28	Ac-Stem	UCC	C	C	0.00127198	2043.67	0.0158909	0.000749807	1823.33	0.0156559
EBT00001514622	GlyT	29	Ac-Stem	UCC	A	A	0.000127714	2076.67	0.000641642	0.000619971	1852.33	0.000359777
EBT00001514622	GlyT	30	Ac-Stem	UCC	G	G	0.00042627	2078	0.000801411	0.00116431	1853	0
EBT00001514622	GlyT	31	Ac-Stem	UCC	C	C	0.00125001	2079.67	0.00494418	0.00209383	1853	0.00501163
EBT00001514622	GlyT	32	Ac-loop	UCC	C	C	0.000947291	2090	0.115781	0.0015916	1862.33	0.0592692
EBT00001514622	GlyT	33	Ac-loop	UCC	T	U	0.00119104	2363.67	0.0227398	0.00416358	1979.67	0.011978
EBT00001514622	GlyT	34	Ac-loop	UCC	T	mnm5U	0.00584095	2418.67	0.0161356	0.00239341	2003.67	0.0141053
EBT00001514622	GlyT	35	Ac-loop	UCC	C	mnm5U	0.00273096	2458.33	0.0827114	0.00382563	2032.33	0.0831579
EBT00001514622	GlyT	36	Ac-loop	UCC	C	C	0.0015131	2680	0.126372	0.002141	2216.67	0.111319
EBT00001514622	GlyT	37	Ac-loop	UCC	A	A	0.000471986	3067.67	0.0457279	0.00107892	2494.33	0.0556537
EBT00001514622	GlyT	38	Ac-loop	UCC	A	A	0.000510881	3214.67	0.0344413	0.000615785	2641.33	0.0433418
EBT00001514622	GlyT	39	Ac-stem	UCC	G	G	0.00136564	3329.33	0.0125556	0.00275806	2761	0.0115752
EBT00001514622	GlyT	40	Ac-stem	UCC	C	C	0.00142305	3371.67	0.00736016	0.000831072	2793.33	0.00640266
EBT00001514622	GlyT	41	Ac-stem	UCC	T	U	0.00109287	3396.67	0.00215433	0.00276701	2811.33	0.0016572
EBT00001514622	GlyT	42	Ac-stem	UCC	G	G	0.000969267	3404	0.0143809	0.00116356	2816	0.0225616
EBT00001514622	GlyT	43	Ac-stem	UCC	A	A	0.000296686	3453.67	0.0410921	0.000467534	2881	0.0428571
EBT00001514622	GlyT	44	V-region	UCC	T	U	0.00164784	3601.67	0.0135123	0.00364612	3010	0.00986842
EBT00001514622	GlyT	45	V-region	UCC	G	G	0.00197382	3651	0.0379447	0.00127051	3040	0.0427207
EBT00001514622	GlyT	46	V-region	UCC	A	A	0.000455358	3795	0.0251734	0.000939367	3175.67	0.0305281
EBT00001514622	GlyT	48	V-region	UCC	T	U	0.00114634	3893	0.00561941	0.00599294	3275.67	0.00757423
EBT00001514622	GlyT	49	T-stem	UCC	G	G	0.00125905	3915	0.00381679	0.00280096	3300.67	0.0034219
EBT00001514622	GlyT	50	T-stem	UCC	C	C	0.00167724	3930	0.0122319	0.00206204	3312	0.00887781
EBT00001514622	GlyT	51	T-stem	UCC	G	G	0.00163507	3978.67	0.0025071	0.00304811	3341.67	0.00089695
EBT00001514622	GlyT	52	T-stem	UCC	G	G	0.000809965	3988.67	0.00100184	0.00296206	3344.67	0.00059761
EBT00001514622	GlyT	53	T-stem	UCC	G	G	0.000809194	3992.67	0.0032454	0.00310405	3346.67	0.00317712
EBT00001514622	GlyT	54	T-loop	UCC	T	T	0.00108666	4005.67	0	0.00280468	3357.33	0.000297767
EBT00001514622	GlyT	55	T-loop	UCC	T	Y	0.000550803	4005.67	0	0.00083356	3358.33	0
EBT00001514622	GlyT	56	T-loop	UCC	C	C	0.00218319	4005.67	0	0.00189415	3358.33	0
EBT00001514622	GlyT	57	T-loop	UCC	G	G	0.000651058	4005.67	0	0.000400322	3358.33	0
EBT00001514622	GlyT	58	T-loop	UCC	A	A	0.00032346	4005.67	0	0.00048697	3358.33	0
EBT00001514622	GlyT	59	T-loop	UCC	T	U	0.00127889	4005.67	0	0.0024031	3358.33	0
EBT00001514622	GlyT	60	T-loop	UCC	T	U	0.000814856	4005.67	0	0.00254564	3358	0
EBT00001514622	GlyT	61	T-stem	UCC	C	C	0.00338265	4005	8.32e-05	0.00438705	3358	9.92555e-05
EBT00001514622	GlyT	62	T-stem	UCC	C	C	0.00360696	4005.33	8.32e-05	0.00772918	3358.33	0
EBT00001514622	GlyT	63	T-stem	UCC	C	C	0.000931133	4005.67	0	0.00257734	3358	9.92555e-05
EBT00001514622	GlyT	64	T-stem	UCC	G	G	0.00127208	4005.67	0	0.00523548	3358.33	0
EBT00001514622	GlyT	65	T-stem	UCC	C	C	0.00103806	4005.67	0	0.00192602	3358	9.92555e-05
EBT00001514622	GlyT	66	Acc-stem	UCC	T	U	0.00155405	4005	0.000166431	0.00555136	3358.33	0
EBT00001514622	GlyT	67	Acc-stem	UCC	G	G	0.00242909	4005.67	0	0.0371896	3358.33	0
EBT00001514622	GlyT	68	Acc-stem	UCC	C	C	0.000893406	4005.33	8.32e-05	0.00240312	3357.67	0.000198511
EBT00001514622	GlyT	69	Acc-stem	UCC	C	C	0.00411981	4005.67	0	0.00540133	3358.33	0
EBT00001514622	GlyT	70	Acc-stem	UCC	C	C	0.00265837	4005.33	0	0.00475246	3358.33	0
EBT00001514622	GlyT	71	Acc-stem	UCC	G	G	0.00261734	4005.33	0	0.0059966	3357.67	9.92653e-05
EBT00001514622	GlyT	72	Acc-stem	UCC	C	C	0.00138593	4005.33	8.32e-05	0.00223568	3358	0
EBT00001514622	GlyT	73		UCC	T	U	0.00286776	4005.67	0	0.00779539	3358	0
EBT00001514622	GlyT	74		UCC	C	C	0.000192289	4005	8.32e-05	0.00166794	3357.67	0.000198511
EBT00001514622	GlyT	75		UCC	C	C	0	4005.33	0	0	3358.33	0
EBT00001514622	GlyT	76		UCC	A	A	0	3791.67	0	0	2928.33	0
EBT00001514749	AlaW	1	Acc-stem	GGC	G	G	NA	51.3333	NA	0	104	0.00952381
EBT00001514749	AlaW	2	Acc-stem	GGC	G	G	NA	51.6667	NA	0	105	0.00630915
EBT00001514749	AlaW	3	Acc-stem	GGC	G	G	NA	51.6667	NA	0.0015015	105.667	0.00314465
EBT00001514749	AlaW	4	Acc-stem	GGC	G	G	NA	52.3333	NA	0.0225974	106	0
EBT00001514749	AlaW	5	Acc-stem	GGC	C	C	NA	52.3333	NA	0.0392157	106	0.280543
EBT00001514749	AlaW	6	Acc-stem	GGC	T	U	NA	65.6667	NA	0.0154829	147.333	0
EBT00001514749	AlaW	7	Acc-stem	GGC	A	A	NA	68	NA	0.00130719	147.333	0.0494624
EBT00001514749	AlaW	8		GGC	T	N in Kim	NA	71.6667	NA	0.438513	155	0.339489
EBT00001514749	AlaW	9		GGC	A	A	NA	83.6667	NA	0	234.667	0
EBT00001514749	AlaW	10	D-stem	GGC	G	G	NA	85.3333	NA	0.00641668	234.667	0.0208623
EBT00001514749	AlaW	11	D-stem	GGC	C	C	NA	86	NA	0.0223029	239.667	0.112346
EBT00001514749	AlaW	12	D-stem	GGC	T	U	NA	90.3333	NA	0.00528426	270	0
EBT00001514749	AlaW	13	D-stem	GGC	C	C	NA	90.3333	NA	0.00695594	270	0.0252708
EBT00001514749	AlaW	14	D-loop	GGC	A	A	NA	93	NA	0.00246914	277	0
EBT00001514749	AlaW	15	D-loop	GGC	G	G	NA	94	NA	0.00398774	277	0.0314685
EBT00001514749	AlaW	16	D-loop	GGC	C	C	0.0143818	100	0.117647	0.00519482	286	0.157171
EBT00001514749	AlaW	17	D-loop	GGC	T	D	0.00229885	113.333	0.025788	0.010907	339.333	0.0116505
EBT00001514749	AlaW	18	D-loop	GGC	G	G	0.00297619	116.333	0.100515	0.00416912	343.333	0
EBT00001514749	AlaW	19	D-loop	GGC	G	G	0	129.333	0.0673077	0.00378788	343.333	0.102005
EBT00001514749	AlaW	20	D-loop	GGC	G	G	0	138.667	0.0956522	0.00648342	382.333	0.0417711
EBT00001514749	AlaW	21	D-loop	GGC	A	A	0.00250627	153.333	0.0356394	0.00192678	399	0.0462151
EBT00001514749	AlaW	22	D-stem	GGC	G	G	0.00239808	159	0.0421687	0.001221	418.333	0
EBT00001514749	AlaW	23	D-stem	GGC	A	A	0	166	0.00796813	0.000706215	418.333	0
EBT00001514749	AlaW	24	D-stem	GGC	G	G	0	167.333	0.0383142	0.00211268	418.333	0
EBT00001514749	AlaW	25	D-stem	GGC	C	C	0.00438597	174	0.00760456	0.00211268	418.333	0.00554675
EBT00001514749	AlaW	26		GGC	G	G	0.00310078	175.333	0.0168224	0	420.667	0.00941915
EBT00001514749	AlaW	27	Ac-Stem	GGC	C	C	0	178.333	0.059754	0.000706215	424.667	0.00234926
EBT00001514749	AlaW	28	Ac-Stem	GGC	T	U	0	189.667	0.0069808	0.00140647	425.667	0
EBT00001514749	AlaW	29	Ac-Stem	GGC	T	U	0.00193798	191	0.00520833	0.000589971	425.667	0
EBT00001514749	AlaW	30	Ac-Stem	GGC	G	G	0	192	0.0900474	0.000589971	425.667	0.00622568
EBT00001514749	AlaW	31	Ac-Stem	GGC	C	C	0.00385357	211	0.398289	0	428.333	0.0701881
EBT00001514749	AlaW	32	Ac-loop	GGC	A	A	0	350.667	0.567612	0.00193951	460.667	0.130818
EBT00001514749	AlaW	33	Ac-loop	GGC	T	U	0	811	0.173012	0.00154239	530	0.0322581
EBT00001514749	AlaW	34	Ac-loop	GGC	G	G	0.00368657	980.667	0.240578	0.00254068	547.667	0.144716
EBT00001514749	AlaW	35	Ac-loop	GGC	G	G	0.0136413	1291.33	0.851337	0.0125731	640.333	0.820417
EBT00001514749	AlaW	36	Ac-loop	GGC	C	C	0.000209441	8686.33	0.467401	0.00037252	3565.67	0.48894
EBT00001514749	AlaW	37	Ac-loop	GGC	A	A	0.000149049	16309.3	0.0996283	0.000143538	6977	0.0923637
EBT00001514749	AlaW	38	Ac-loop	GGC	T	U	0.000364199	18114	0.0260068	0.00117328	7687	0.0243273
EBT00001514749	AlaW	39	Ac-stem	GGC	G	G	0.000872437	18597.7	0.0137701	0.00200267	7878.67	0.0252794
EBT00001514749	AlaW	40	Ac-stem	GGC	C	C	0.00125813	18857.3	0.0110482	0.00254955	8083	0.0102045
EBT00001514749	AlaW	41	Ac-stem	GGC	A	A	0.000471876	19068	0.00190184	0.00141147	8166.33	0.0031737
EBT00001514749	AlaW	42	Ac-stem	GGC	A	A	0.000674065	19104.3	0.00125468	0.00213689	8192.33	0.00162489
EBT00001514749	AlaW	43	Ac-stem	GGC	G	G	0.00271494	19128.3	0.0049074	0.00270851	8205.67	0.00601631
EBT00001514749	AlaW	44	V-region	GGC	A	A	0.000502423	19222.7	0.000623874	0.000713386	8255.33	0
EBT00001514749	AlaW	45	V-region	GGC	G	G	0.00144657	19234.7	0.00224781	0.00197314	8253.67	0.00153232
EBT00001514749	AlaW	46	V-region	GGC	G	m7G	0.00258397	19278	0.00836734	0.00410309	8266.33	0.0129751
EBT00001514749	AlaW	47	V-region	GGC	T	U	0.000973354	19440.7	0.000668254	0.00636226	8375	0.000238749
EBT00001514749	AlaW	48	V-region	GGC	C	C	0.00113114	19453.7	0.00519892	0.00201985	8377	0.00348943
EBT00001514749	AlaW	49	T-stem	GGC	A	A	0.000276298	19555.3	0.00107272	0.0372526	8406.33	0.00106948
EBT00001514749	AlaW	50	T-stem	GGC	G	G	0.000642904	19576.3	0.000646622	0.0379199	8415.33	0
EBT00001514749	AlaW	51	T-stem	GGC	C	C	0.0017468	19589	0.000153124	0.00310669	8415.33	7.92142e-05
EBT00001514749	AlaW	52	T-stem	GGC	G	G	0.000990894	19592	0.0001531	0.00250403	8416	0.000356337
EBT00001514749	AlaW	53	T-stem	GGC	G	G	0.000722465	19595	0.00218963	0.00195728	8419	0.00378653
EBT00001514749	AlaW	54	T-loop	GGC	T	T	0.000821582	19638	3.39e-05	0.00368458	8451	0
EBT00001514749	AlaW	55	T-loop	GGC	T	Y	0.0003513	19638.7	0	0.00165846	8451	0
EBT00001514749	AlaW	56	T-loop	GGC	C	C	0.000192295	19638.7	0	0.000969806	8451	0
EBT00001514749	AlaW	57	T-loop	GGC	G	G	0.000370084	19638.3	1.7e-05	0.00095471	8451	0
EBT00001514749	AlaW	58	T-loop	GGC	A	A	0.000349166	19638.7	0	0.00143893	8451	0
EBT00001514749	AlaW	59	T-loop	GGC	T	U	0.000808109	19638.3	0	0.00270732	8451	0
EBT00001514749	AlaW	60	T-loop	GGC	C	C	0.00133377	19637.3	6.79e-05	0.00405018	8448.67	0.000276101
EBT00001514749	AlaW	61	T-stem	GGC	C	C	0.00180393	19638.7	0	0.00602468	8451	0
EBT00001514749	AlaW	62	T-stem	GGC	C	C	0.00170265	19638.7	0	0.00385939	8451	0
EBT00001514749	AlaW	63	T-stem	GGC	G	G	0.00117851	19638.7	0	0.00275656	8451	0
EBT00001514749	AlaW	64	T-stem	GGC	C	C	0.000786885	19638.7	0	0.0384652	8451	0
EBT00001514749	AlaW	65	T-stem	GGC	T	U	0.000589396	19633.3	0.000271573	0.0388704	8449.67	0.000157772
EBT00001514749	AlaW	66	Acc-stem	GGC	T	U	0.00166721	19638.7	0	0.00575683	8451	0
EBT00001514749	AlaW	67	Acc-stem	GGC	A	A	0.000617648	19637.7	0	0.000814255	8450.67	0
EBT00001514749	AlaW	68	Acc-stem	GGC	G	G	0.0019609	19637	6.79e-05	0.00409757	8450.67	3.9443e-05
EBT00001514749	AlaW	69	Acc-stem	GGC	C	C	0.00102802	19638.3	0	0.00431634	8451	0
EBT00001514749	AlaW	70	Acc-stem	GGC	T	U	0.00094797	19638.3	0	0.00380295	8450.67	0
EBT00001514749	AlaW	71	Acc-stem	GGC	C	C	0.00164192	19636.3	5.09e-05	0.00589644	8449.67	0.000157772
EBT00001514749	AlaW	72	Acc-stem	GGC	C	C	0.00204163	19637.3	5.09e-05	0.00389361	8451	0
EBT00001514749	AlaW	73		GGC	A	A	0.000816323	19638.3	0	0.00642821	8450.67	0
EBT00001514749	AlaW	74		GGC	C	C	0.000175987	19638	3.39e-05	0.00108776	8450.33	0
EBT00001514749	AlaW	75		GGC	C	C	0	19638.7	0	0	8450	0
EBT00001514749	AlaW	76		GGC	A	A	0	18259	0	0	7080.33	0
EBT00001514652	AlaT	1	Acc-stem	UGC	G	G	0	309.333	0.00642398	0	302.667	0.0021978
EBT00001514652	AlaT	2	Acc-stem	UGC	G	G	0	311.333	0.00638298	0	303.333	0.00437637
EBT00001514652	AlaT	3	Acc-stem	UGC	G	G	0	313.333	0.005291	0.00563923	304.667	0.00218341
EBT00001514652	AlaT	4	Acc-stem	UGC	G	G	0.00572849	315	0.00630915	0.00816273	305.333	0.00217865
EBT00001514652	AlaT	5	Acc-stem	UGC	C	C	0.0120396	317	0.10283	0.029142	306	0.152355
EBT00001514652	AlaT	6	Acc-stem	UGC	T	U	0.00305987	353.333	0.0185185	0.508696	361	0.0269542
EBT00001514652	AlaT	7	Acc-stem	UGC	A	A	0.0012945	360	0.0374332	0.00284934	371	0.0740433
EBT00001514652	AlaT	8		UGC	T	s4U	0.741831	374	0.184593	0.401115	400.667	0.241162
EBT00001514652	AlaT	9		UGC	A	A	0.000506586	458.667	0.00434153	0.0205362	528	0.0143124
EBT00001514652	AlaT	10	D-stem	UGC	G	G	0.0186841	460.667	0.0349162	0.00738655	535.667	0.00741198
EBT00001514652	AlaT	11	D-stem	UGC	C	C	0.0014881	477.333	0.0695257	0.00760989	539.667	0.142479
EBT00001514652	AlaT	12	D-stem	UGC	T	U	0.00468476	513	0	0.00963574	629.333	0.000529381
EBT00001514652	AlaT	13	D-stem	UGC	C	C	0.0131266	513	0.0302457	0.00968174	629.667	0.0401423
EBT00001514652	AlaT	14	D-loop	UGC	A	A	0.000764526	529	0.00188679	0.00236884	656	0
EBT00001514652	AlaT	15	D-loop	UGC	G	G	0.00641106	530	0.0940171	0.00771731	656	0.0423358
EBT00001514652	AlaT	16	D-loop	UGC	C	C	0.00498971	585	0.0753425	0.00341713	685	0.0472879
EBT00001514652	AlaT	17	D-loop	UGC	T	D	0.00245181	632.667	0.00835946	0.00747406	719	0.00736309
EBT00001514652	AlaT	18	D-loop	UGC	G	G	0.00468671	638	0.113068	0.00605764	724.333	0.000459982
EBT00001514652	AlaT	19	D-loop	UGC	G	G	0.00390274	719.333	0.0746141	0.00571234	724.667	0.0298974
EBT00001514652	AlaT	20	D-loop	UGC	G	G	0.00594621	777.333	0.0978723	0.0127199	747	0.0423077
EBT00001514652	AlaT	21	D-loop	UGC	A	A	0.00250104	861.667	0.0189753	0.00167748	780	0.00721256
EBT00001514652	AlaT	22	D-stem	UGC	G	G	0.00446897	878.333	0.0487365	0.00165223	785.667	0
EBT00001514652	AlaT	23	D-stem	UGC	A	A	0.000917011	923.333	0.0124777	0.00247115	785.667	0
EBT00001514652	AlaT	24	D-stem	UGC	G	G	0.00127353	935	0.0216254	0.00100498	785.667	0.0104954
EBT00001514652	AlaT	25	D-stem	UGC	C	C	0.00273336	955.667	0.0103555	0.00328474	794	0.00791337
EBT00001514652	AlaT	26		UGC	G	G	0.00283425	965.667	0.0189638	0.000477555	800.333	0.0191993
EBT00001514652	AlaT	27	Ac-Stem	UGC	C	C	0.00141939	984.333	0.0192627	0.00143105	816	0.00325733
EBT00001514652	AlaT	28	Ac-Stem	UGC	C	C	0.00093811	1003.67	0.0166558	0.000496032	818.667	0
EBT00001514652	AlaT	29	Ac-Stem	UGC	T	U	0.00366175	1020.67	0.00130463	0.0037958	818.667	0.00162602
EBT00001514652	AlaT	30	Ac-Stem	UGC	G	G	0.00101079	1022	0.0349386	0.00189856	820	0.00485437
EBT00001514652	AlaT	31	Ac-Stem	UGC	C	C	0.00114389	1059	0.369017	0.00373797	824	0.198184
EBT00001514652	AlaT	32	Ac-loop	UGC	T	U	0.0015525	1678.33	0.0516105	0.00403875	1027.67	0.0112251
EBT00001514652	AlaT	33	Ac-loop	UGC	T	U	0.0023075	1769.67	0.0274776	0.00375884	1039.33	0.0337775
EBT00001514652	AlaT	34	Ac-loop	UGC	T	mcmo5U	0.00423331	1819.67	0.027263	0.00368856	1075.67	0.0170576
EBT00001514652	AlaT	35	Ac-loop	UGC	G	G	0.0356017	1870.67	0.170926	0.0158988	1094.33	0.0950937
EBT00001514652	AlaT	36	Ac-loop	UGC	C	C	0.00322285	2256.33	0.728523	0.00569597	1209.33	0.677282
EBT00001514652	AlaT	37	Ac-loop	UGC	A	A	0.000603847	8311.33	0.656121	0.000690732	3747.33	0.670332
EBT00001514652	AlaT	38	Ac-loop	UGC	C	C	0.00120109	24169.3	0.518814	0.000588729	11367	0.477563
EBT00001514652	AlaT	39	Ac-stem	UGC	G	G	8.78e-05	50228.7	0.0522059	0.000470855	21757.7	0.0697081
EBT00001514652	AlaT	40	Ac-stem	UGC	C	C	0.000273852	52995.3	0.0188411	0.000545958	23388	0.0143429
EBT00001514652	AlaT	41	Ac-stem	UGC	A	A	0.000268596	54013	0.00303325	0.000914737	23728.3	0.0024244
EBT00001514652	AlaT	42	Ac-stem	UGC	G	G	0.00172634	54177.3	0.00166459	0.00238069	23786	0.00174867
EBT00001514652	AlaT	43	Ac-stem	UGC	G	G	0.000743971	54267.7	0.0038426	0.00157605	23827.7	0.0011179
EBT00001514652	AlaT	44	V-region	UGC	A	A	0.000434512	54477	0.000599282	0.00087115	23854.3	0.000293362
EBT00001514652	AlaT	45	V-region	UGC	G	G	0.000809655	54509.7	0.00156912	0.00158601	23861.3	0.00188235
EBT00001514652	AlaT	46	V-region	UGC	G	m7G	0.00220578	54595.3	0.00937485	0.00402413	23906.3	0.00870779
EBT00001514652	AlaT	47	V-region	UGC	T	U	0.0011355	55112	0.000562175	0.0055453	24116.3	0.000911413
EBT00001514652	AlaT	48	V-region	UGC	C	C	0.000643322	55143	0.00367384	0.00170075	24138.3	0.00220462
EBT00001514652	AlaT	49	T-stem	UGC	T	U	0.000659695	55346.3	0.000246869	0.0140503	24191.7	0.000220413
EBT00001514652	AlaT	50	T-stem	UGC	G	G	0.000730179	55360	0.000956454	0.00220023	24197	0.000302976
EBT00001514652	AlaT	51	T-stem	UGC	C	C	0.000893098	55413	0.000204483	0.0148373	24204.3	0.000220298
EBT00001514652	AlaT	52	T-stem	UGC	G	G	0.00105964	55424.3	0.000492922	0.0141977	24209.7	0.000275296
EBT00001514652	AlaT	53	T-stem	UGC	G	G	0.000476862	55451.7	0.00349828	0.00162227	24216.3	0.00415342
EBT00001514652	AlaT	54	T-loop	UGC	T	T	0.000377262	55646.3	2.4e-05	0.00216907	24317.3	0
EBT00001514652	AlaT	55	T-loop	UGC	T	Y	0.000288688	55647.7	0	0.00115286	24317.3	0
EBT00001514652	AlaT	56	T-loop	UGC	C	C	0.000141548	55647.3	5.99e-06	0.00064487	24317.3	0
EBT00001514652	AlaT	57	T-loop	UGC	G	G	9.01e-05	55647.7	0	8.49e-05	24317.3	0
EBT00001514652	AlaT	58	T-loop	UGC	A	A	0.000146781	55647.7	0	0.000797604	24317.3	0
EBT00001514652	AlaT	59	T-loop	UGC	T	U	0.000412319	55647.3	0	0.00204765	24317.3	0
EBT00001514652	AlaT	60	T-loop	UGC	C	C	0.00114374	55643.3	6.59e-05	0.00355653	24310	0.000301568
EBT00001514652	AlaT	61	T-stem	UGC	C	C	0.00118747	55647	5.99e-06	0.00236672	24317.3	0
EBT00001514652	AlaT	62	T-stem	UGC	C	C	0.00112878	55647.3	0	0.0148783	24317	0
EBT00001514652	AlaT	63	T-stem	UGC	G	G	0.00114657	55645.7	1.2e-05	0.0144322	24316.3	2.74158e-05
EBT00001514652	AlaT	64	T-stem	UGC	C	C	0.000695842	55646.3	0	0.00185378	24317	0
EBT00001514652	AlaT	65	T-stem	UGC	A	A	0.000179188	55646.3	5.99e-06	0.0123719	24315.7	6.85379e-05
EBT00001514652	AlaT	66	Acc-stem	UGC	T	U	0.000914658	55646.7	5.99e-06	0.00398366	24317.3	0
EBT00001514652	AlaT	67	Acc-stem	UGC	A	A	0.000176832	55647	0	0.0124363	24317.3	0
EBT00001514652	AlaT	68	Acc-stem	UGC	G	G	0.00155648	55646.7	5.99e-06	0.00290074	24317	0
EBT00001514652	AlaT	69	Acc-stem	UGC	C	C	0.00105537	55647	0	0.00300977	24317	0
EBT00001514652	AlaT	70	Acc-stem	UGC	T	U	0.00102826	55646.3	0	0.0034605	24316.3	0
EBT00001514652	AlaT	71	Acc-stem	UGC	C	C	0.00162938	55643	7.19e-05	0.00576257	24308.3	0.000328997
EBT00001514652	AlaT	72	Acc-stem	UGC	C	C	0.00213639	55647	0	0.00312882	24316.3	0
EBT00001514652	AlaT	73		UGC	A	A	0.000843256	55645	0	0.00514978	24315.3	1.37089e-05
EBT00001514652	AlaT	74		UGC	C	C	0.000252205	55644	6.59e-05	0.00115915	24315.7	0
EBT00001514652	AlaT	75		UGC	C	C	0	55647.7	0	0	24314.3	0
EBT00001514652	AlaT	76		UGC	A	A	0	52082.7	0	0	20754.3	0
EBT00001514721	AspT	1	Acc-stem	GUC	G	G	0	973.667	0.0108364	0	750	0.0008881
EBT00001514721	AspT	2	Acc-stem	GUC	G	G	0	984.333	0.00438301	0	750.667	0.230349
EBT00001514721	AspT	3	Acc-stem	GUC	A	A	0.000374111	988.667	0.000673854	0	975.333	0.0207497
EBT00001514721	AspT	4	Acc-stem	GUC	G	G	0.000664549	989.333	0.00100976	0.000524934	996	0
EBT00001514721	AspT	5	Acc-stem	GUC	C	C	0.0024667	990.333	0.00100874	0.000721244	996	0.00033456
EBT00001514721	AspT	6	Acc-stem	GUC	G	G	0.00223971	991.333	0.00201342	0.000784775	996.333	0
EBT00001514721	AspT	7	Acc-stem	GUC	G	G	0.00181498	993.333	0.0129182	0.000196194	996.333	0.00763612
EBT00001514721	AspT	8		GUC	T	s4U	0.0480262	1006.33	0.00264288	0.0559411	1004	0.00594059
EBT00001514721	AspT	9		GUC	A	A	0.000529942	1009	0.000660284	0.000194137	1010	0.0117417
EBT00001514721	AspT	10	D-stem	GUC	G	G	0.00281587	1009.67	0.0181523	0.00117343	1022	0.0466418
EBT00001514721	AspT	11	D-stem	GUC	T	U	0.00088162	1028.33	0.00515963	0.00337867	1072	0
EBT00001514721	AspT	12	D-stem	GUC	T	U	0.00264461	1033.67	0.000644537	0.00336831	1072	0
EBT00001514721	AspT	13	D-stem	GUC	C	C	0.00159206	1034.33	0.00289203	0.00216517	1072	0.000310848
EBT00001514721	AspT	14	D-loop	GUC	A	A	0.000258198	1037.33	0	0	1072.33	0.00525665
EBT00001514721	AspT	15	D-loop	GUC	G	G	0.000634846	1037.33	0.0302275	0.000177778	1078	0.164341
EBT00001514721	AspT	16	D-loop	GUC	T	D	0.000503525	1069.67	0.000311526	0.00191274	1290	0.000258331
EBT00001514721	AspT	17	D-loop	GUC	C	C	0.00130571	1070	0.00124456	0.00696724	1290.33	0.016764
EBT00001514721	AspT	18	D-loop	GUC	G	G	0.00120926	1071.33	0.00217324	0.00120358	1312.33	0
EBT00001514721	AspT	19	D-loop	GUC	G	G	0.00147239	1073.67	0.114867	0.000819558	1312.33	0.157861
EBT00001514721	AspT	20	D-loop	GUC	T	DD	0.00130165	1213	0.0172833	0.00156079	1558.33	0.00848356
EBT00001514721	AspT	20a	D-loop	GUC	T	DD	0.000740825	1234.33	0.00537201	0.00222878	1571.67	0.0129789
EBT00001514721	AspT	21	D-loop	GUC	A	A	0.000220313	1241	0.00799361	0.000267308	1592.33	0.000209293
EBT00001514721	AspT	22	D-stem	GUC	G	G	0.00373887	1251	0.0287267	0.00106923	1592.67	0.0436349
EBT00001514721	AspT	23	D-stem	GUC	A	A	0.000581947	1288	0.0359281	0	1665.33	0.0710301
EBT00001514721	AspT	24	D-stem	GUC	A	A	0.00049651	1336	0.0383877	0.000489858	1792.67	0.0356823
EBT00001514721	AspT	25	D-stem	GUC	T	U	0.00133374	1389.33	0.0095057	0.0044821	1859	0.000179276
EBT00001514721	AspT	26		GUC	A	A	0.00114859	1402.67	0.00543607	0.00617232	1859.33	0
EBT00001514721	AspT	27	Ac-Stem	GUC	C	C	0.000813307	1410.33	0.00447059	0.000822519	1859.33	0
EBT00001514721	AspT	28	Ac-Stem	GUC	C	C	0.00158284	1416.67	0.0072413	0.00264368	1859.33	0.00552683
EBT00001514721	AspT	29	Ac-Stem	GUC	T	U	0.000717379	1427	0.000466963	0.428983	1869.67	0.000356442
EBT00001514721	AspT	30	Ac-Stem	GUC	G	G	0.00118744	1427.67	0.00209692	0.000712517	1870.33	0
EBT00001514721	AspT	31	Ac-Stem	GUC	C	C	0.00303904	1430.67	0.0223235	0.0012886	1862	0.00410055
EBT00001514721	AspT	32	Ac-loop	GUC	C	C	0.00153809	1463.33	0.0651618	0.00070972	1869.67	0.00988526
EBT00001514721	AspT	33	Ac-loop	GUC	T	U	0.00423132	1565.33	0.00634786	0.00174631	1888.33	0.0144398
EBT00001514721	AspT	34	Ac-loop	GUC	G	Glu-Q	0.00296066	1575.33	0.282526	0.00261823	1916	0.184681
EBT00001514721	AspT	35	Ac-loop	GUC	T	U	0.00374027	2195.67	0.02328	0.00190627	2350	0
EBT00001514721	AspT	36	Ac-loop	GUC	C	C	0.00288153	2248	0.682635	0.00150423	2254.33	0.614072
EBT00001514721	AspT	37	Ac-loop	GUC	A	m2A	0.00156871	7083.33	0.528574	0.00305057	5841.33	0.573936
EBT00001514721	AspT	38	Ac-loop	GUC	C	C	0.00277932	15025.3	0.517888	0.00349663	13710	0.447578
EBT00001514721	AspT	39	Ac-stem	GUC	G	G	0.000221554	31165.7	0.0262555	0.000339238	24818	0.0287004
EBT00001514721	AspT	40	Ac-stem	GUC	C	C	0.000315389	32006	0.0113468	0.00043562	25551.3	0.0110565
EBT00001514721	AspT	41	Ac-stem	GUC	A	A	0.000372662	32373.3	0	0.0490075	25837	0.00559354
EBT00001514721	AspT	42	Ac-stem	GUC	G	G	0.00103886	32373	0.0048875	0.00217527	25982.3	0.00322255
EBT00001514721	AspT	43	Ac-stem	GUC	G	G	0.00129566	32532	0.00121783	0.00123711	26066.3	0.000881586
EBT00001514721	AspT	44	V-region	GUC	G	G	0.000995866	32571.7	0.000664757	0.00109071	26089.3	0.000459747
EBT00001514721	AspT	45	V-region	GUC	G	G	0.000746449	32593.3	0.0029164	0.00194066	26101.3	0.00322059
EBT00001514721	AspT	46	V-region	GUC	G	m7G	0.00175258	32688.7	0.0182797	0.00296736	26185.7	0.0297293
EBT00001514721	AspT	47	V-region	GUC	T	U	0.00777007	33297.3	0.00320318	0.00489482	26988	0.00109805
EBT00001514721	AspT	48	V-region	GUC	C	C	0.00140222	33404.3	0.00206134	0.00216164	27017.7	0.00115839
EBT00001514721	AspT	49	T-stem	GUC	G	G	0.000959711	33473.3	0.00128296	0.00167889	27049	0.00100949
EBT00001514721	AspT	50	T-stem	GUC	C	C	0.00155617	33516.3	0.000516894	0.00166767	27076.3	0
EBT00001514721	AspT	51	T-stem	GUC	G	G	0.00131009	33533.7	0.000377587	0.00126097	27076	3.69317e-05
EBT00001514721	AspT	52	T-stem	GUC	G	G	0.000883615	33546.3	0.000427087	0.00164598	27077	0.000184624
EBT00001514721	AspT	53	T-stem	GUC	G	G	0.000578002	33560.7	0.00207154	0.000886211	27082	0.00369112
EBT00001514721	AspT	54	T-loop	GUC	T	T	0.000292652	33630.3	9.91e-06	0.00107876	27182.3	1.2263e-05
EBT00001514721	AspT	55	T-loop	GUC	T	Y	0.000191982	33630.7	0	0.000504712	27182.7	0
EBT00001514721	AspT	56	T-loop	GUC	C	C	0.000198107	33630.7	0	0.000470837	27182.7	0
EBT00001514721	AspT	57	T-loop	GUC	G	G	3.42e-05	33630.7	0	9.71e-05	27182.7	0
EBT00001514721	AspT	58	T-loop	GUC	A	A	8.04e-05	33630.7	0	0.00035148	27182.7	0
EBT00001514721	AspT	59	T-loop	GUC	G	G	0.00100377	33630.7	0	0.00164313	27182.3	0
EBT00001514721	AspT	60	T-loop	GUC	T	U	0.000930648	33630.7	0	0.00231158	27181.7	0
EBT00001514721	AspT	61	T-stem	GUC	C	C	0.000873596	33629.7	2.97e-05	0.00173346	27179.7	0.000110364
EBT00001514721	AspT	62	T-stem	GUC	C	C	0.00194183	33630.7	0	0.00491445	27182.7	0
EBT00001514721	AspT	63	T-stem	GUC	C	C	0.00146405	33630.3	0	0.00292125	27182.3	1.2263e-05
EBT00001514721	AspT	64	T-stem	GUC	G	G	0.00140428	33628	7.93e-05	0.00282563	27182.7	0
EBT00001514721	AspT	65	T-stem	GUC	T	Y	0.00186824	33630.7	0	0.00537887	27182.7	0
EBT00001514721	AspT	66	Acc-stem	GUC	C	C	0.00360067	33630.3	9.91e-06	0.012226	27181.3	3.67886e-05
EBT00001514721	AspT	67	Acc-stem	GUC	C	C	0.00231789	33630.7	0	0.00424239	27182.3	0
EBT00001514721	AspT	68	Acc-stem	GUC	G	G	0.00511661	33629.3	0	0.0145267	27172.7	0.000343364
EBT00001514721	AspT	69	Acc-stem	GUC	T	U	0.00493164	33629	3.96e-05	0.0664664	27182	0
EBT00001514721	AspT	70	Acc-stem	GUC	T	U	0.00171752	33630.3	0	0.00509972	27182	0
EBT00001514721	AspT	71	Acc-stem	GUC	C	C	0.0100501	33629.3	2.97e-05	0.0891351	27181	4.90513e-05
EBT00001514721	AspT	72	Acc-stem	GUC	C	C	0.00204251	33630.3	0	0.00654978	27182.3	0
EBT00001514721	AspT	73		GUC	G	G	0.00522046	33630	0	0.0110124	27182	0
EBT00001514721	AspT	74		GUC	C	C	0.00077958	33627.3	6.94e-05	0.00285256	27181.7	1.22629e-05
EBT00001514721	AspT	75		GUC	C	C	0	33629.7	0	0	27182	0
EBT00001514721	AspT	76		GUC	A	A	0	29499.3	0	0	22130.7	0
EBT00001514732	GltT	1	Acc-stem	UUC	G	G	0	2791.67	0.136776	0	2159	0.0576168
EBT00001514732	GltT	2	Acc-stem	UUC	T	U	0	3234	0.00277521	0	2291	0.00535456
EBT00001514732	GltT	3	Acc-stem	UUC	C	C	8.74e-05	3243	0.00297192	0.000137912	2303.33	0.000289352
EBT00001514732	GltT	4	Acc-stem	UUC	C	C	0.00207686	3252.67	0.00102375	0.00080595	2304	0.00446493
EBT00001514732	GltT	5	Acc-stem	UUC	C	C	0.000884715	3256	0.000511614	0.00137631	2314.33	0.00955777
EBT00001514732	GltT	6	Acc-stem	UUC	C	C	0.00121165	3257.67	0.00761576	0.00164473	2336.67	0.0278741
EBT00001514732	GltT	7	Acc-stem	UUC	T	U	0.00077602	3282.67	0.00182445	0.00328279	2403.67	0.00565361
EBT00001514732	GltT	8		UUC	T	s4U	0.0116954	3288.67	0.000810208	0.00193095	2417.33	0.00466648
EBT00001514732	GltT	9		UUC	C	C	0.00197761	3291.33	0.000607287	0.00211379	2428.67	0
EBT00001514732	GltT	10	D-stem	UUC	G	G	0.00256099	3293.33	0.0255449	0.00552823	2428.67	0.0373894
EBT00001514732	GltT	11	D-stem	UUC	T	U	0.000748756	3379.67	0.00383179	0.00291183	2523	0.00329207
EBT00001514732	GltT	12	D-stem	UUC	C	C	0.000543497	3392.67	0.0495845	0.00115506	2531.33	0.0591005
EBT00001514732	GltT	13	D-stem	UUC	T	Y	0.00107504	3569.67	0.00167801	0.00260214	2690.33	0
EBT00001514732	GltT	14	D-loop	UUC	A	A	0.000363671	3575.67	0.00932767	0.00111616	2689.67	0.0141723
EBT00001514732	GltT	15	D-loop	UUC	G	G	0.0012727	3609.33	0.0167983	0.00100865	2728.33	0.0211672
EBT00001514732	GltT	16	D-loop	UUC	A	A	0.000777039	3671	0.00631598	0.0763665	2787.33	0.00487921
EBT00001514732	GltT	18	D-loop	UUC	G	G	0.000693835	3694.33	0.00341696	0.00450184	2801	0.00461976
EBT00001514732	GltT	19	D-loop	UUC	G	G	0.000706678	3707	0.0120814	0.00142891	2814	0.00354108
EBT00001514732	GltT	20	D-loop	UUC	C	C	0.00190312	3752.33	0.0165123	0.00409805	2824	0.0468047
EBT00001514732	GltT	20a	D-loop	UUC	C	C	0.00111341	3815.33	0.0174264	0.0011936	2962.67	0.0117856
EBT00001514732	GltT	20b	D-loop	UUC	C	C	0.00183842	3883	0.0362373	0.0156974	2998	0.0978032
EBT00001514732	GltT	21	D-loop	UUC	A	A	0.000503795	4029	0.0248487	0.000551404	3323	0.0096364
EBT00001514732	GltT	22	D-stem	UUC	G	G	0.00142557	4131.67	0.0136081	0.00222324	3355.33	0.00592534
EBT00001514732	GltT	23	D-stem	UUC	G	G	0.00169624	4188.67	0.0378254	0.00101592	3375.33	0.0351596
EBT00001514732	GltT	24	D-stem	UUC	A	A	8.91e-05	4353.33	0.0200345	0.000438298	3498.33	0.0142763
EBT00001514732	GltT	25	D-stem	UUC	C	C	0.000936155	4442.33	0.0210812	0.00361152	3549	0.0141667
EBT00001514732	GltT	26		UUC	A	A	0.000531124	4538	0.00249121	0.00271023	3600	0.000185151
EBT00001514732	GltT	27	Ac-Stem	UUC	C	C	0.000216873	4549.33	0.00321355	0.00140088	3600.67	0
EBT00001514732	GltT	28	Ac-Stem	UUC	C	C	0.00136419	4564	0.00138575	0.00433524	3600.33	0.00166374
EBT00001514732	GltT	29	Ac-Stem	UUC	G	G	0.000891437	4570.33	0.00319884	0.00235824	3606.33	9.24216e-05
EBT00001514732	GltT	30	Ac-Stem	UUC	C	C	0.00101323	4585	0.00405474	0.0016531	3606.67	0.00258112
EBT00001514732	GltT	31	Ac-Stem	UUC	C	C	0.00097684	4603.67	0.0186869	0.00260889	3616	0
EBT00001514732	GltT	32	Ac-loop	UUC	C	C	0.00145771	4691.33	0.260703	0.00352751	3607	0.190832
EBT00001514732	GltT	33	Ac-loop	UUC	T	U	0.00262362	6345.67	0.12191	0.00697815	4457.67	0.102905
EBT00001514732	GltT	34	Ac-loop	UUC	T	mnm5s2U	0.0139232	7226.67	0.0816672	0.00989816	4969	0.0568175
EBT00001514732	GltT	35	Ac-loop	UUC	T	U	0.00294139	7869.33	0.00668995	0.00659398	5268.33	0
EBT00001514732	GltT	36	Ac-loop	UUC	C	C	0.0314233	7922.33	0.243186	0.0263581	5061	0.210945
EBT00001514732	GltT	37	Ac-loop	UUC	A	m2A	0.00272508	10468	0.24366	0.002345	6414	0.255312
EBT00001514732	GltT	38	Ac-loop	UUC	C	C	0.00259688	13840.3	0.332331	0.00393812	8613	0.275813
EBT00001514732	GltT	39	Ac-stem	UUC	G	G	0.000667313	20729.3	0.0170547	0.00188432	11893.3	0.0140923
EBT00001514732	GltT	40	Ac-stem	UUC	G	G	0.000290906	21089	0.00176715	0.00164415	12063.3	0.000469523
EBT00001514732	GltT	41	Ac-stem	UUC	C	C	0.000748008	21126.3	0.00118196	0.00148356	12069	0.000414113
EBT00001514732	GltT	42	Ac-stem	UUC	G	G	0.00131721	21151.3	0.00152633	0.00229043	12074	0.000662142
EBT00001514732	GltT	43	Ac-stem	UUC	G	G	0.00171219	21183.7	0.042575	0.00298147	12082	0.0525655
EBT00001514732	GltT	44	V-region	UUC	T	U	0.000826016	22125.7	0.00735767	0.00316617	12752.3	0.00538166
EBT00001514732	GltT	45	V-region	UUC	A	A	0.000157231	22289.7	0.0308138	0.0007394	12821.3	0.0448473
EBT00001514732	GltT	46	V-region	UUC	A	A	0.00087859	22998.3	0.0217915	0.00140755	13423.3	0.0316685
EBT00001514732	GltT	48	V-region	UUC	C	C	0.00185724	23510.7	0.0316859	0.00211556	13862.3	0.0306061
EBT00001514732	GltT	49	T-stem	UUC	A	A	0.000557309	24280	0.00461887	0.00130907	14300	0.0032991
EBT00001514732	GltT	50	T-stem	UUC	G	G	0.00131806	24392.7	0.00210004	0.00299441	14347.3	0.00187835
EBT00001514732	GltT	51	T-stem	UUC	G	G	0.00206058	24444	0.000436181	0.00351798	14374.3	0.000533074
EBT00001514732	GltT	52	T-stem	UUC	G	G	0.00108773	24454.7	0.000653844	0.0024678	14382	0.000579092
EBT00001514732	GltT	53	T-stem	UUC	G	G	0.000826827	24470.7	0.00799957	0.00196237	14390.3	0.00742631
EBT00001514732	GltT	54	T-loop	UUC	T	T	0.000646043	24668	0	0.0028893	14498	6.89703e-05
EBT00001514732	GltT	55	T-loop	UUC	T	Y	0.000397763	24666.7	0	0.00163364	14499	0
EBT00001514732	GltT	56	T-loop	UUC	C	C	0.000462047	24665.7	0	0.00144355	14499	0
EBT00001514732	GltT	57	T-loop	UUC	G	G	0.000431187	24663.7	1.35e-05	0.000855135	14499	0
EBT00001514732	GltT	58	T-loop	UUC	A	A	0.000119838	24664	0	0.000466562	14499	0
EBT00001514732	GltT	59	T-loop	UUC	A	A	0.000217456	24662.7	0	0.0640302	14498.7	0
EBT00001514732	GltT	60	T-loop	UUC	T	U	0.000815624	24658	0	0.00328454	14489	0
EBT00001514732	GltT	61	T-stem	UUC	C	C	0.000858267	24640	0.00032457	0.00204613	14480.7	0.000621132
EBT00001514732	GltT	62	T-stem	UUC	C	C	0.00115098	24648	0.000608199	0.00361889	14489.7	0.000620747
EBT00001514732	GltT	63	T-stem	UUC	C	C	0.00120462	24663	0.00016216	0.00356476	14498.7	0
EBT00001514732	GltT	64	T-stem	UUC	C	C	0.000915366	24667	5.41e-05	0.00181321	14498.3	2.29911e-05
EBT00001514732	GltT	65	T-stem	UUC	T	U	0.00104006	24668.3	0	0.00456557	14498.7	0
EBT00001514732	GltT	66	Acc-stem	UUC	A	A	0.000285351	24668	0	0.000765397	14498.3	0
EBT00001514732	GltT	67	Acc-stem	UUC	G	G	0.00216171	24654.3	0.000540519	0.00448443	14490	0.000574778
EBT00001514732	GltT	68	Acc-stem	UUC	G	G	0.00317349	24667.7	1.35e-05	0.00609196	14498.3	0
EBT00001514732	GltT	69	Acc-stem	UUC	G	G	0.00315736	24668	0	0.00603481	14498	4.59815e-05
EBT00001514732	GltT	70	Acc-stem	UUC	G	G	0.0024162	24668	0	0.00404313	14498.7	0
EBT00001514732	GltT	71	Acc-stem	UUC	A	A	0.00059789	24667.7	1.35e-05	0.00429516	14497.3	0
EBT00001514732	GltT	72	Acc-stem	UUC	C	C	0.00109442	24668	0	0.0025596	14497	0
EBT00001514732	GltT	73		UUC	G	G	0.0018197	24667	0	0.00515642	14496.7	0
EBT00001514732	GltT	74		UUC	C	C	0.000252003	24666	6.76e-05	0.00175303	14496.7	4.5985e-05
EBT00001514732	GltT	75		UUC	C	C	0	24667.7	0	0	14497.3	0
EBT00001514732	GltT	76		UUC	A	A	0	21730.7	0	0	11029.7	0
EBT00001514730	LeuP	1	Acc-stem	CAG	G	G	NA	0.333333	NA	NA	0.333333	NA
EBT00001514730	LeuP	2	Acc-stem	CAG	C	C	NA	0.333333	NA	NA	0.333333	NA
EBT00001514730	LeuP	3	Acc-stem	CAG	G	G	NA	0.333333	NA	NA	0.333333	NA
EBT00001514730	LeuP	4	Acc-stem	CAG	A	A	NA	0.333333	NA	NA	0.333333	NA
EBT00001514730	LeuP	5	Acc-stem	CAG	A	A	NA	0.333333	NA	NA	0.333333	NA
EBT00001514730	LeuP	6	Acc-stem	CAG	G	G	NA	0.333333	NA	NA	0.333333	NA
EBT00001514730	LeuP	7	Acc-stem	CAG	G	G	NA	0.333333	NA	NA	0.333333	NA
EBT00001514730	LeuP	8		CAG	T	U	NA	0.333333	NA	NA	0.333333	NA
EBT00001514730	LeuP	9		CAG	G	G	NA	0.333333	NA	NA	0.333333	NA
EBT00001514730	LeuP	10	D-stem	CAG	G	G	NA	0.333333	NA	NA	0.333333	NA
EBT00001514730	LeuP	11	D-stem	CAG	C	C	NA	0.333333	NA	NA	0.333333	NA
EBT00001514730	LeuP	12	D-stem	CAG	G	G	NA	0.333333	NA	NA	0.333333	NA
EBT00001514730	LeuP	13	D-stem	CAG	G	G	NA	0.333333	NA	NA	0.333333	NA
EBT00001514730	LeuP	14	D-loop	CAG	A	A	NA	0.666667	NA	NA	3.33333	NA
EBT00001514730	LeuP	15	D-loop	CAG	A	A	NA	1.33333	NA	NA	5.33333	NA
EBT00001514730	LeuP	16	D-loop	CAG	T	DD	NA	2.66667	NA	NA	17	NA
EBT00001514730	LeuP	17	D-loop	CAG	T	DD	NA	3.66667	NA	NA	17	NA
EBT00001514730	LeuP	18	D-loop	CAG	G	Gm	NA	3.66667	NA	NA	17	NA
EBT00001514730	LeuP	19	D-loop	CAG	G	G	NA	3.66667	NA	NA	19.6667	NA
EBT00001514730	LeuP	20	D-loop	CAG	T	D	NA	4.66667	NA	NA	20	NA
EBT00001514730	LeuP	20a	D-loop	CAG	A	A	NA	4.66667	NA	NA	20	NA
EBT00001514730	LeuP	21	D-loop	CAG	G	G	NA	4.66667	NA	NA	20	NA
EBT00001514730	LeuP	22	D-stem	CAG	A	A	NA	5	NA	NA	20	NA
EBT00001514730	LeuP	23	D-stem	CAG	C	C	NA	5	NA	NA	20	NA
EBT00001514730	LeuP	24	D-stem	CAG	G	G	NA	5	NA	NA	20	NA
EBT00001514730	LeuP	25	D-stem	CAG	C	C	NA	5	NA	NA	20	NA
EBT00001514730	LeuP	26		CAG	G	G	NA	5	NA	NA	20	NA
EBT00001514730	LeuP	27	Ac-Stem	CAG	C	C	NA	5.66667	NA	NA	20	NA
EBT00001514730	LeuP	28	Ac-Stem	CAG	T	U	NA	5.66667	NA	NA	20	NA
EBT00001514730	LeuP	29	Ac-Stem	CAG	A	A	NA	5.66667	NA	NA	20	NA
EBT00001514730	LeuP	30	Ac-Stem	CAG	G	G	NA	5.66667	NA	NA	20	NA
EBT00001514730	LeuP	31	Ac-Stem	CAG	C	C	NA	6	NA	NA	20	NA
EBT00001514730	LeuP	32	Ac-loop	CAG	T	U	NA	7.33333	NA	NA	20	NA
EBT00001514730	LeuP	33	Ac-loop	CAG	T	U	NA	8	NA	NA	20	NA
EBT00001514730	LeuP	34	Ac-loop	CAG	C	C	NA	8	NA	NA	20	NA
EBT00001514730	LeuP	35	Ac-loop	CAG	A	A	NA	8.33333	NA	NA	20.6667	NA
EBT00001514730	LeuP	36	Ac-loop	CAG	G	G	NA	9.66667	NA	NA	21.6667	NA
EBT00001514730	LeuP	37	Ac-loop	CAG	G	ac4C	NA	10	NA	NA	21.6667	NA
EBT00001514730	LeuP	38	Ac-loop	CAG	T	Y	NA	81	NA	0	244.333	0.0626598
EBT00001514730	LeuP	39	Ac-stem	CAG	G	G	NA	90.6667	NA	0.00155763	260.667	0.158235
EBT00001514730	LeuP	40	Ac-stem	CAG	T	Y	0	107.667	0.0122324	0.000727802	309.667	0.00321888
EBT00001514730	LeuP	41	Ac-stem	CAG	T	U	0	109	0.00607903	0	310.667	0
EBT00001514730	LeuP	42	Ac-stem	CAG	A	A	0	109.667	0.00604229	0	310.667	0
EBT00001514730	LeuP	43	Ac-stem	CAG	G	G	0	110.333	0.0321637	0	310.667	0.0210084
EBT00001514730	LeuP	44	V-region	CAG	T	U	0	114	0	0	317.333	0.00314136
EBT00001514730	LeuP	V1	V-region	CAG	G	G	0	114	0.00869565	0	318.333	0.00104602
EBT00001514730	LeuP	V2	V-region	CAG	T	U	0	115	0	0	318.667	0.00104493
EBT00001514730	LeuP	V3	V-region	CAG	T	C	0	115	0	0	319	0
EBT00001514730	LeuP	V4	V-region	CAG	C	C	0	115	0.00576369	0.000706215	319	0
EBT00001514730	LeuP	V8	V-region	CAG	T	U	0	115.667	0	0	319	0
EBT00001514730	LeuP	V9	V-region	CAG	T	U	0	115.667	0	0	319	0
EBT00001514730	LeuP	V10	V-region	CAG	A	A	0	115.667	0	0	319	0
EBT00001514730	LeuP	V11	V-region	CAG	C	C	0	115.667	0	0	319	0
EBT00001514730	LeuP	V16	V-region	CAG	G	G	0	115.667	0	0	319	0
EBT00001514730	LeuP	V17	V-region	CAG	G	G	0	115.667	0	0	319	0
EBT00001514730	LeuP	V18	V-region	CAG	A	A	0	115.667	0	0	319	0
EBT00001514730	LeuP	V19	V-region	CAG	C	C	0	115.667	0	0	319	0
EBT00001514730	LeuP	46	V-region	CAG	G	G	0	115.667	0	0	319	0
EBT00001514730	LeuP	48	V-region	CAG	T	U	0	115.667	0	0	319	0
EBT00001514730	LeuP	49	T-stem	CAG	G	G	0	115.667	0	0	318.667	0.00104493
EBT00001514730	LeuP	50	T-stem	CAG	G	G	0.00314465	115.667	0	0	319	0
EBT00001514730	LeuP	51	T-stem	CAG	G	G	0.00549207	115.667	0	0.00349562	319	0
EBT00001514730	LeuP	52	T-stem	CAG	G	G	0	115.667	0	0	319	0
EBT00001514730	LeuP	53	T-stem	CAG	G	G	0	115.667	0	0.00206123	319	0
EBT00001514730	LeuP	54	T-loop	CAG	T	T	0.107189	115.667	0	0.160699	319	0
EBT00001514730	LeuP	55	T-loop	CAG	T	Y	0.00549207	115.667	0	0.0027894	319	0
EBT00001514730	LeuP	56	T-loop	CAG	C	C	0.420624	115.667	0	0.499479	319	0
EBT00001514730	LeuP	57	T-loop	CAG	A	A	0.0336195	115.667	0	0.0658129	319	0
EBT00001514730	LeuP	58	T-loop	CAG	A	A	0.00571442	115.667	0	0.0123496	319	0
EBT00001514730	LeuP	59	T-loop	CAG	G	G	0.110959	115.667	0	0.113689	319	0
EBT00001514730	LeuP	60	T-loop	CAG	T	U	0.0592214	115.667	0	0.0858558	319	0
EBT00001514730	LeuP	61	T-stem	CAG	C	C	0.653171	115.667	0	0.688262	318.333	0.00208986
EBT00001514730	LeuP	62	T-stem	CAG	C	C	0.0539074	115.667	0	0.0657952	319	0
EBT00001514730	LeuP	63	T-stem	CAG	C	C	0.00704225	115.667	0	0.0138634	319	0
EBT00001514730	LeuP	64	T-stem	CAG	C	C	0	115.667	0	0.00414441	319	0
EBT00001514730	LeuP	65	T-stem	CAG	C	C	0.003367	115.667	0	0.00420183	319	0
EBT00001514730	LeuP	66	Acc-stem	CAG	C	C	0.00234742	115.667	0	0.00414441	319	0
EBT00001514730	LeuP	67	Acc-stem	CAG	C	C	0.00234742	115.667	0	0.0013947	319	0
EBT00001514730	LeuP	68	Acc-stem	CAG	C	C	0	115.667	0	0.00274971	319	0
EBT00001514730	LeuP	69	Acc-stem	CAG	T	U	0.460438	115.667	0	0.496059	318.667	0.00104493
EBT00001514730	LeuP	70	Acc-stem	CAG	C	C	0.0333112	115.667	0	0.0394851	319	0
EBT00001514730	LeuP	71	Acc-stem	CAG	G	G	0.0562991	115.667	0	0.0546553	319	0
EBT00001514730	LeuP	72	Acc-stem	CAG	C	C	0.00783949	115.667	0	0.0118596	319	0
EBT00001514730	LeuP	73		CAG	A	A	0.232861	115.667	0	0.356333	319	0
EBT00001514730	LeuP	74		CAG	C	C	0.0112065	115.667	0	0.0104252	319	0
EBT00001514730	LeuP	75		CAG	C	C	0	115.667	0	0	319	0
EBT00001514730	LeuP	76		CAG	A	A	NA	38	NA	0	104.667	0
EBT00001514592	LeuQ	1	Acc-stem	CAG	G	G	NA	1	NA	NA	3	NA
EBT00001514592	LeuQ	2	Acc-stem	CAG	C	C	NA	1.33333	NA	NA	3	NA
EBT00001514592	LeuQ	3	Acc-stem	CAG	G	G	NA	1.33333	NA	NA	3	NA
EBT00001514592	LeuQ	4	Acc-stem	CAG	A	A	NA	1.33333	NA	NA	3	NA
EBT00001514592	LeuQ	5	Acc-stem	CAG	A	A	NA	1.33333	NA	NA	3	NA
EBT00001514592	LeuQ	6	Acc-stem	CAG	G	G	NA	1.33333	NA	NA	3	NA
EBT00001514592	LeuQ	7	Acc-stem	CAG	G	G	NA	1.33333	NA	NA	3	NA
EBT00001514592	LeuQ	8		CAG	T	U	NA	1.33333	NA	NA	3	NA
EBT00001514592	LeuQ	9		CAG	G	G	NA	1.33333	NA	NA	3	NA
EBT00001514592	LeuQ	10	D-stem	CAG	G	G	NA	1.33333	NA	NA	3.33333	NA
EBT00001514592	LeuQ	11	D-stem	CAG	C	C	NA	1.33333	NA	NA	3.33333	NA
EBT00001514592	LeuQ	12	D-stem	CAG	G	G	NA	1.33333	NA	NA	3.33333	NA
EBT00001514592	LeuQ	13	D-stem	CAG	G	G	NA	1.33333	NA	NA	3.33333	NA
EBT00001514592	LeuQ	14	D-loop	CAG	A	A	NA	2	NA	NA	15	NA
EBT00001514592	LeuQ	15	D-loop	CAG	A	A	NA	3.66667	NA	NA	19.6667	NA
EBT00001514592	LeuQ	16	D-loop	CAG	T	DD	NA	15	NA	NA	90.6667	NA
EBT00001514592	LeuQ	17	D-loop	CAG	T	DD	NA	15.3333	NA	NA	94	NA
EBT00001514592	LeuQ	18	D-loop	CAG	G	Gm	NA	15.3333	NA	NA	94	NA
EBT00001514592	LeuQ	19	D-loop	CAG	G	G	NA	15.6667	NA	NA	94	NA
EBT00001514592	LeuQ	20	D-loop	CAG	T	D	NA	16	NA	NA	95.3333	NA
EBT00001514592	LeuQ	20a	D-loop	CAG	A	A	NA	16	NA	NA	97	NA
EBT00001514592	LeuQ	21	D-loop	CAG	G	G	NA	16.6667	NA	NA	97	NA
EBT00001514592	LeuQ	22	D-stem	CAG	A	A	NA	17.6667	NA	NA	97	NA
EBT00001514592	LeuQ	23	D-stem	CAG	C	C	NA	17.6667	NA	NA	97	NA
EBT00001514592	LeuQ	24	D-stem	CAG	G	G	NA	18.3333	NA	NA	97	NA
EBT00001514592	LeuQ	25	D-stem	CAG	C	C	NA	18.6667	NA	NA	97	NA
EBT00001514592	LeuQ	26		CAG	G	G	NA	18.6667	NA	NA	97	NA
EBT00001514592	LeuQ	27	Ac-Stem	CAG	C	C	NA	19	NA	NA	99.6667	NA
EBT00001514592	LeuQ	28	Ac-Stem	CAG	T	U	NA	19.3333	NA	NA	99.6667	NA
EBT00001514592	LeuQ	29	Ac-Stem	CAG	A	A	NA	19.3333	NA	NA	99.6667	NA
EBT00001514592	LeuQ	30	Ac-Stem	CAG	G	G	NA	19.3333	NA	NA	99.6667	NA
EBT00001514592	LeuQ	31	Ac-Stem	CAG	C	C	NA	20	NA	NA	99.6667	NA
EBT00001514592	LeuQ	32	Ac-loop	CAG	T	U	NA	41	NA	0	120	0
EBT00001514592	LeuQ	33	Ac-loop	CAG	T	U	NA	44.3333	NA	0.00277778	120	0.00277008
EBT00001514592	LeuQ	34	Ac-loop	CAG	C	C	NA	47.6667	NA	0	120.333	0.0997506
EBT00001514592	LeuQ	35	Ac-loop	CAG	A	A	NA	48	NA	0.0938189	133.667	0.0927602
EBT00001514592	LeuQ	36	Ac-loop	CAG	G	G	NA	56	NA	0	147.333	0.0111857
EBT00001514592	LeuQ	37	Ac-loop	CAG	G	m1G	NA	66	NA	0.705039	149	0.918117
EBT00001514592	LeuQ	38	Ac-loop	CAG	T	Y	0.000412031	585.333	0.0767613	0.000288226	1819.67	0.0832914
EBT00001514592	LeuQ	39	Ac-stem	CAG	G	G	0.000384025	634	0.161006	0	1985	0.171536
EBT00001514592	LeuQ	40	Ac-stem	CAG	T	Y	0.000845859	755.667	0.0164859	0.00117889	2396	0.00249792
EBT00001514592	LeuQ	41	Ac-stem	CAG	T	U	0.00063674	768.333	0.00817556	0.0012012	2402	0.00110896
EBT00001514592	LeuQ	42	Ac-stem	CAG	A	A	0	774.667	0.003003	0.000682148	2404.67	0.00331583
EBT00001514592	LeuQ	43	Ac-stem	CAG	G	G	0.00155849	777	0.015625	0.00437992	2412.67	0.00699684
EBT00001514592	LeuQ	44	V-region	CAG	T	U	0.00177248	789.333	0.00252738	0	2429.67	0
EBT00001514592	LeuQ	V1	V-region	CAG	G	G	0.000499002	791.333	0.0230453	0	2429.67	0.00559345
EBT00001514592	LeuQ	V2	V-region	CAG	T	U	0	810	0	0	2443.33	0.000681663
EBT00001514592	LeuQ	V3	V-region	CAG	C	C	0	810	0	0	2445	0
EBT00001514592	LeuQ	V4	V-region	CAG	C	C	0.00030248	810	0	0	2445	0
EBT00001514592	LeuQ	V8	V-region	CAG	T	U	0	810	0	0	2445	0
EBT00001514592	LeuQ	V9	V-region	CAG	T	U	0	810	0	0	2445	0
EBT00001514592	LeuQ	V10	V-region	CAG	A	A	0	810	0	0	2445	0
EBT00001514592	LeuQ	V11	V-region	CAG	C	C	0	810	0	0	2445	0
EBT00001514592	LeuQ	V16	V-region	CAG	G	G	0	810	0	0	2445	0
EBT00001514592	LeuQ	V17	V-region	CAG	G	G	0	810	0	0	2445	0
EBT00001514592	LeuQ	V18	V-region	CAG	A	A	0	810	0	0	2445	0
EBT00001514592	LeuQ	V19	V-region	CAG	C	C	0	810	0	0.000819336	2445	0
EBT00001514592	LeuQ	46	V-region	CAG	G	G	0	810	0	0	2445	0
EBT00001514592	LeuQ	48	V-region	CAG	T	U	0	810	0	0	2445	0
EBT00001514592	LeuQ	49	T-stem	CAG	G	G	0.00128	810	0	0.000168011	2444.67	0.000136333
EBT00001514592	LeuQ	50	T-stem	CAG	G	G	0.000818476	810	0	0.00081622	2445	0
EBT00001514592	LeuQ	51	T-stem	CAG	G	G	0.0013962	810	0	0.000502207	2445	0
EBT00001514592	LeuQ	52	T-stem	CAG	G	G	0.000791239	810	0	0.000640588	2445	0
EBT00001514592	LeuQ	53	T-stem	CAG	G	G	0.00415411	810	0	0.00150845	2445	0
EBT00001514592	LeuQ	54	T-loop	CAG	T	T	0.123444	809.667	0.000411523	0.17302	2444.67	0.000136333
EBT00001514592	LeuQ	55	T-loop	CAG	T	Y	0.00666798	810	0	0.00392565	2445	0
EBT00001514592	LeuQ	56	T-loop	CAG	C	C	0.41852	809.333	0	0.510201	2445	0
EBT00001514592	LeuQ	57	T-loop	CAG	A	A	0.0367298	809.333	0	0.0551184	2444	0.000408998
EBT00001514592	LeuQ	58	T-loop	CAG	A	A	0.0108778	809.333	0.000823045	0.00975235	2445	0
EBT00001514592	LeuQ	59	T-loop	CAG	G	G	0.0760331	810	0	0.106194	2445	0
EBT00001514592	LeuQ	60	T-loop	CAG	T	U	0.091838	809.667	0	0.0942196	2445	0
EBT00001514592	LeuQ	61	T-stem	CAG	C	C	0.691963	808	0.00246914	0.678355	2440	0.00204499
EBT00001514592	LeuQ	62	T-stem	CAG	C	C	0.058542	810	0	0.0704118	2445	0
EBT00001514592	LeuQ	63	T-stem	CAG	C	C	0.00625258	810	0	0.0118039	2445	0
EBT00001514592	LeuQ	64	T-stem	CAG	C	C	0.00359199	810	0	0.00475261	2445	0
EBT00001514592	LeuQ	65	T-stem	CAG	C	C	0.00558589	810	0	0.00615961	2445	0
EBT00001514592	LeuQ	66	Acc-stem	CAG	C	C	0.00267835	809.667	0.000411523	0.00291941	2445	0
EBT00001514592	LeuQ	67	Acc-stem	CAG	C	C	0.00273067	810	0	0.00320959	2445	0
EBT00001514592	LeuQ	68	Acc-stem	CAG	C	C	0.00149495	809.667	0	0.00365967	2444.67	0
EBT00001514592	LeuQ	69	Acc-stem	CAG	T	U	0.521348	809.667	0.000411523	0.553716	2443.33	0.000681663
EBT00001514592	LeuQ	70	Acc-stem	CAG	C	C	0.0376556	810	0	0.0485808	2445	0
EBT00001514592	LeuQ	71	Acc-stem	CAG	G	G	0.0447907	809.667	0	0.0572931	2445	0
EBT00001514592	LeuQ	72	Acc-stem	CAG	C	C	0.0107836	809.667	0.000411523	0.0163989	2445	0
EBT00001514592	LeuQ	73		CAG	A	A	0.286097	810	0	0.395273	2445	0
EBT00001514592	LeuQ	74		CAG	C	C	0.0123461	810	0	0.0107524	2445	0
EBT00001514592	LeuQ	75		CAG	C	C	0	810	0	0	2445	0
EBT00001514592	LeuQ	76		CAG	A	A	0	246.333	0	0	812	0
EBT00001514711	LeuU	1	Acc-stem	GAG	G	G	0	250	0.0577889	0	314.333	0.0187305
EBT00001514711	LeuU	2	Acc-stem	GAG	C	C	0	265.333	0.017284	0	320.333	0.00207684
EBT00001514711	LeuU	3	Acc-stem	GAG	C	C	0	270	0.00856793	0.00108578	321	0.00103734
EBT00001514711	LeuU	4	Acc-stem	GAG	G	G	0.00588089	272.333	0.00365854	0	321.333	0
EBT00001514711	LeuU	5	Acc-stem	GAG	A	A	0	273.333	0	0.000816993	321.333	0
EBT00001514711	LeuU	6	Acc-stem	GAG	G	G	0	273.333	0.00485437	0.00108578	312	0.0290456
EBT00001514711	LeuU	7	Acc-stem	GAG	G	G	0	274.667	0.00603136	0.00108578	321.333	0.0163265
EBT00001514711	LeuU	8		GAG	T	U	0.010961	276.333	0.00120482	0.0406961	326.667	0
EBT00001514711	LeuU	9		GAG	G	G	0.00133869	276.667	0.00479616	0	326.667	0
EBT00001514711	LeuU	10	D-stem	GAG	G	G	0.00132275	278	0.00477327	0.00108578	326.667	0.0140845
EBT00001514711	LeuU	11	D-stem	GAG	T	U	0.00215836	279.333	0	0.00847072	331.333	0
EBT00001514711	LeuU	12	D-stem	GAG	G	G	0	279	0.00238379	0.000761035	331.333	0.0321324
EBT00001514711	LeuU	13	D-stem	GAG	G	G	0	279.667	0.0266821	0.0141479	342.333	0.052583
EBT00001514711	LeuU	14	D-loop	GAG	A	A	0.000825083	287.333	0.0422222	0	361.333	0.177542
EBT00001514711	LeuU	15	D-loop	GAG	A	A	0	300	0.181818	0	439.333	0.312826
EBT00001514711	LeuU	16	D-loop	GAG	T	DD	0.000658762	366.667	0.00452489	0.00197941	639.333	0.000521105
EBT00001514711	LeuU	17	D-loop	GAG	T	DD	0.000653595	368.333	0.0045045	0.000716846	639.667	0.000520833
EBT00001514711	LeuU	18	D-loop	GAG	G	Gm	0.0039083	370	0.00715563	0	640	0
EBT00001514711	LeuU	19	D-loop	GAG	G	G	0.00133869	372.667	0.0244328	0.000715308	640	0.0670554
EBT00001514711	LeuU	20	D-loop	GAG	T	D	0.000634921	382	0.00434405	0.000488759	686	0
EBT00001514711	LeuU	20a	D-loop	GAG	A	A	0	383.667	0.0034632	0.000855059	686	0
EBT00001514711	LeuU	21	D-loop	GAG	G	G	0	385	0.00943396	0.000977517	686	0.010101
EBT00001514711	LeuU	22	D-stem	GAG	A	A	0.00152737	388.667	0.00171233	0.00276253	693	0
EBT00001514711	LeuU	23	D-stem	GAG	C	C	0.000896057	389.333	0.0242272	0.0010989	693	0.000480769
EBT00001514711	LeuU	24	D-stem	GAG	A	A	0	399	0.00498753	0.00131462	693.333	0
EBT00001514711	LeuU	25	D-stem	GAG	C	C	0.000865801	401	0.00496278	0.000713776	693.333	0
EBT00001514711	LeuU	26		GAG	G	G	0.0038184	403	0.00738916	0.0346261	693.333	0
EBT00001514711	LeuU	27	Ac-Stem	GAG	C	C	0.00237248	406	0.0137652	0.00142755	693.333	0
EBT00001514711	LeuU	28	Ac-Stem	GAG	T	U	0.00059312	411.667	0.00161681	0.00546044	693.333	0
EBT00001514711	LeuU	29	Ac-Stem	GAG	A	A	0	412.333	0.00161421	0.000474158	693.333	0
EBT00001514711	LeuU	30	Ac-Stem	GAG	C	C	0.00118413	413	0.00481928	0.0014652	693.333	0
EBT00001514711	LeuU	31	Ac-Stem	GAG	C	C	0.00117994	415	0.136017	0	693.333	0.0262172
EBT00001514711	LeuU	32	Ac-loop	GAG	T	U	0.00167911	480.333	0.0217244	0.00209084	712	0
EBT00001514711	LeuU	33	Ac-loop	GAG	T	U	0.00152905	491	0.0147157	0.00442835	712	0.00326645
EBT00001514711	LeuU	34	Ac-loop	GAG	G	G	0.00295201	498.333	0.0279584	0.0280034	714.333	0
EBT00001514711	LeuU	35	Ac-loop	GAG	A	A	0.0251343	512.667	0.0210057	0.0456588	714.333	0.0110752
EBT00001514711	LeuU	36	Ac-loop	GAG	G	G	0.00128106	523.667	0.0156642	0.00104915	722.333	0.0118559
EBT00001514711	LeuU	37	Ac-loop	GAG	G	m1G	0.510993	532	0.71403	0.548088	731	0.508737
EBT00001514711	LeuU	38	Ac-loop	GAG	T	Y	0.000616887	1860.33	0.0874755	0.00137827	1488	0.0526316
EBT00001514711	LeuU	39	Ac-stem	GAG	G	G	0.000506179	2038.67	0.0211268	0.00163986	1570.67	0.00841751
EBT00001514711	LeuU	40	Ac-stem	GAG	G	G	0	2082.67	0.0420117	0.00171531	1584	0.0327702
EBT00001514711	LeuU	41	Ac-stem	GAG	T	U	0.000590034	2174	0.00351413	0.00229265	1637.67	0
EBT00001514711	LeuU	42	Ac-stem	GAG	A	A	0.000186116	2181.67	0.0129694	0.000169463	1637.67	0
EBT00001514711	LeuU	43	Ac-stem	GAG	G	G	0.00217461	2210.33	0.0398204	0	1637.67	0.0072742
EBT00001514711	LeuU	44	V-region	GAG	T	U	0.00118065	2302	0.00932434	0.00380514	1649.67	0.0012109
EBT00001514711	LeuU	V1	V-region	GAG	G	G	0.00113789	2323.67	0.0107847	0.00130726	1651.67	0.000605083
EBT00001514711	LeuU	V2	V-region	GAG	C	C	0.00149242	2349	0.00536344	0.119185	1652.67	0.00100745
EBT00001514711	LeuU	V3	V-region	GAG	C	C	0.00247014	2361.67	0.018834	0.00392967	1654.33	0
EBT00001514711	LeuU	V4	V-region	GAG	C	C	0.00209937	2407	0.14514	0.0063966	1647	0
EBT00001514711	LeuU	V8	V-region	GAG	A	A	0.000698415	2815.67	0.197892	0.000614628	1576	0.318634
EBT00001514711	LeuU	V9	V-region	GAG	A	A	0.000402129	3510.33	0.269087	0.000960957	2313	0.248945
EBT00001514711	LeuU	V10	V-region	GAG	T	U	0.000697204	4802.67	0.0274065	0.00281289	3079.67	0.0108137
EBT00001514711	LeuU	V11	V-region	GAG	A	A	0.00615303	4938	0.0540834	0.000185082	3113.33	0
EBT00001514711	LeuU	V16	V-region	GAG	G	G	0.00340595	5220.33	0.00892292	0.00103071	3012.33	0.0628435
EBT00001514711	LeuU	V17	V-region	GAG	G	G	0.00138875	5267.33	0.00170573	0.00204443	3214.33	0.000207361
EBT00001514711	LeuU	V18	V-region	GAG	G	G	0.000581859	5276.33	0.00777283	0.00575289	3215	0.0104648
EBT00001514711	LeuU	V19	V-region	GAG	C	C	0.00150625	5317.67	0.124087	0.00503604	3249	0.0945657
EBT00001514711	LeuU	46	V-region	GAG	T	U	0.000271914	6071	0.0271353	0.00527873	3588.33	0.0211857
EBT00001514711	LeuU	48	V-region	GAG	T	U	0.000834943	6240.33	0.0104657	0.00268847	3666	0.00793794
EBT00001514711	LeuU	49	T-stem	GAG	A	A	0.00050412	6306.33	0.011753	0.000612344	3695.33	0.00893975
EBT00001514711	LeuU	50	T-stem	GAG	C	C	0.00163098	6381.33	0.00281279	0.0532227	3728.67	0.0033856
EBT00001514711	LeuU	51	T-stem	GAG	G	G	0.00095212	6399.33	0.00171598	0.00285876	3741.33	0.000445276
EBT00001514711	LeuU	52	T-stem	GAG	G	G	0.0012967	6410.33	0.00150571	0.00248348	3743	0.000178079
EBT00001514711	LeuU	53	T-stem	GAG	G	G	0.000625474	6420	0.0049597	0.00222453	3743.67	0.00452048
EBT00001514711	LeuU	54	T-loop	GAG	T	T	0.00118295	6452	0	0.00340193	3760.67	0
EBT00001514711	LeuU	55	T-loop	GAG	T	Y	0.000777203	6451.67	0	0.00181441	3760.67	0
EBT00001514711	LeuU	56	T-loop	GAG	C	C	0.000853109	6451.33	5.17e-05	0.00195644	3760.67	0
EBT00001514711	LeuU	57	T-loop	GAG	A	A	0.000101449	6451.67	0	0.0535788	3760.67	0
EBT00001514711	LeuU	58	T-loop	GAG	A	A	0.000143226	6451.67	5.17e-05	0.000434299	3760.67	0
EBT00001514711	LeuU	59	T-loop	GAG	G	G	0.000993756	6452	0	0.00154324	3760.67	0
EBT00001514711	LeuU	60	T-loop	GAG	T	U	0.000576385	6452	0	0.00158067	3760.67	0
EBT00001514711	LeuU	61	T-stem	GAG	C	C	0.00102746	6452	0	0.00312072	3760	0.000177274
EBT00001514711	LeuU	62	T-stem	GAG	C	C	0.00354816	6452	0	0.00703814	3760.67	0
EBT00001514711	LeuU	63	T-stem	GAG	C	C	0.000922529	6451.67	0	0.00340008	3760.67	0
EBT00001514711	LeuU	64	T-stem	GAG	G	G	0.000835023	6450.33	0.000258318	0.0541395	3760.33	0
EBT00001514711	LeuU	65	T-stem	GAG	T	U	0.00148938	6452	0	0.00431046	3760.33	8.86369e-05
EBT00001514711	LeuU	66	Acc-stem	GAG	C	C	0.0014571	6452	0	0.003793	3760.67	0
EBT00001514711	LeuU	67	Acc-stem	GAG	C	C	0.0014034	6452	0	0.00419134	3760	0
EBT00001514711	LeuU	68	Acc-stem	GAG	T	U	0.00108333	6451.67	5.17e-05	0.00525927	3759.67	8.86524e-05
EBT00001514711	LeuU	69	Acc-stem	GAG	C	C	0.00147887	6452	0	0.00159364	3760	8.86445e-05
EBT00001514711	LeuU	70	Acc-stem	GAG	G	G	0.00142921	6451	0.000154991	0.0037572	3760.33	0
EBT00001514711	LeuU	71	Acc-stem	GAG	G	G	0.00245859	6452	0	0.00677905	3760	0
EBT00001514711	LeuU	72	Acc-stem	GAG	T	U	0.00155861	6451.67	5.17e-05	0.00577062	3760	0
EBT00001514711	LeuU	73		GAG	A	A	0.000973752	6452	0	0.00324367	3759.67	0
EBT00001514711	LeuU	74		GAG	C	C	0.000453175	6452	0	0.00175108	3759.67	8.86524e-05
EBT00001514711	LeuU	75		GAG	C	C	0	6452	0	0	3760	0
EBT00001514711	LeuU	76		GAG	A	A	0	6113.67	0	0	3301.67	0
EBT00001514636	LeuW	1	Acc-stem	UAG	G	G	0	586	0.0713154	0	366	0.0027248
EBT00001514636	LeuW	2	Acc-stem	UAG	C	C	0	631	0.00263435	0	367	0.000907441
EBT00001514636	LeuW	3	Acc-stem	UAG	G	G	0.0003663	632.667	0.00367454	0	367.333	0.000906618
EBT00001514636	LeuW	4	Acc-stem	UAG	G	G	0.0010929	635	0.000524659	0.00154407	367.667	0
EBT00001514636	LeuW	5	Acc-stem	UAG	G	G	0.00136272	635.333	0.00104822	0.00225784	367.667	0
EBT00001514636	LeuW	6	Acc-stem	UAG	A	A	0	636	0	0	367.667	0
EBT00001514636	LeuW	7	Acc-stem	UAG	G	G	0.000363108	636	0.00625	0.00225784	367.667	0
EBT00001514636	LeuW	8		UAG	T	U	0.199372	640	0.00518135	0.0804614	367.667	0
EBT00001514636	LeuW	9		UAG	G	G	0.00276926	643.333	0.00206825	0.000710732	367.667	0
EBT00001514636	LeuW	10	D-stem	UAG	G	G	0.00126263	644.667	0.00257865	0.000710732	367.667	0
EBT00001514636	LeuW	11	D-stem	UAG	C	C	0.00232271	646.333	0.00970378	0.00605974	367.667	0
EBT00001514636	LeuW	12	D-stem	UAG	G	G	0.000631313	652.667	0.0045755	0.0025	367.667	0.00180996
EBT00001514636	LeuW	13	D-stem	UAG	A	A	0.000631313	655.667	0.00656566	0	368.333	0
EBT00001514636	LeuW	14	D-loop	UAG	A	A	0.000688705	660	0.0255906	0	368.333	0.0587734
EBT00001514636	LeuW	15	D-loop	UAG	A	A	0.00706256	677.333	0.0700229	0.00425837	391.333	0.0955316
EBT00001514636	LeuW	16	D-loop	UAG	T	DD	0	728.333	0.00273848	0.000611621	432.667	0
EBT00001514636	LeuW	17	D-loop	UAG	T	DD	0.00265964	730.333	0.00318471	0.00122324	432.667	0.0188964
EBT00001514636	LeuW	18	D-loop	UAG	G	Gm	0.00317752	732.667	0.00181653	0.000695894	441	0
EBT00001514636	LeuW	19	D-loop	UAG	G	G	0.000870913	734	0.0165252	0.00311824	441	0.00824588
EBT00001514636	LeuW	20	D-loop	UAG	T	U	0.00115072	746.333	0.000446429	0.000680272	444.667	0.0169492
EBT00001514636	LeuW	20a	D-loop	UAG	A	A	0	746.667	0.00222717	0	452.333	0
EBT00001514636	LeuW	21	D-loop	UAG	G	G	0.000851816	748.333	0.00575731	0.000611621	452.333	0.0166667
EBT00001514636	LeuW	22	D-stem	UAG	A	A	0.000308071	752.667	0.00132685	0.00348419	460	0
EBT00001514636	LeuW	23	D-stem	UAG	C	C	0.00257886	753.667	0.001766	0.00293845	460	0
EBT00001514636	LeuW	24	D-stem	UAG	G	G	0.000538503	755	0.00132275	0	460	0
EBT00001514636	LeuW	25	D-stem	UAG	C	C	0.00115038	756	0.00438982	0	460	0
EBT00001514636	LeuW	26		UAG	A	A	0.000304414	759.333	0.000877193	0.00452189	460	0
EBT00001514636	LeuW	27	Ac-Stem	UAG	C	C	0.000895925	760	0	0.000677507	460	0
EBT00001514636	LeuW	28	Ac-Stem	UAG	C	C	0.00197275	760	0	0.00497097	460	0
EBT00001514636	LeuW	29	Ac-Stem	UAG	A	A	0.000304136	759	0.0168394	0	460	0.0135811
EBT00001514636	LeuW	30	Ac-Stem	UAG	G	G	0.000525762	772	0.0631068	0	466.333	0.0318339
EBT00001514636	LeuW	31	Ac-Stem	UAG	A	A	0	824	0.0692771	0	481.667	0.0385895
EBT00001514636	LeuW	32	Ac-loop	UAG	T	U	0.00186553	885.333	0.0938246	0.00599109	501	0.0321958
EBT00001514636	LeuW	33	Ac-loop	UAG	T	U	0.0035338	977	0.0566463	0.0133746	517.667	0
EBT00001514636	LeuW	34	Ac-loop	UAG	T	cmo5U	0.0139035	1035.67	0.00480461	0.0027836	517.667	0
EBT00001514636	LeuW	35	Ac-loop	UAG	A	A	0.0047011	1040.67	0.00573248	0	514.333	0.00835476
EBT00001514636	LeuW	36	Ac-loop	UAG	G	G	0.000688705	1046.67	0.00349096	0.000548246	518.667	0
EBT00001514636	LeuW	37	Ac-loop	UAG	G	m1G	0.724145	1050.33	0.596026	0.79978	518.667	0.656815
EBT00001514636	LeuW	38	Ac-loop	UAG	T	Y	0.000772615	2600	0.0431796	0.00112443	1511.33	0.0577722
EBT00001514636	LeuW	39	Ac-Stem	UAG	T	U	0.000476188	2717.33	0.00658055	0.000893754	1604	0.0119097
EBT00001514636	LeuW	40	Ac-Stem	UAG	C	C	0.000984278	2735.33	0.00641724	0.000315358	1623.33	0.00388628
EBT00001514636	LeuW	41	Ac-Stem	UAG	T	U	0.000822618	2753	0.000605034	0.00112236	1629.67	0
EBT00001514636	LeuW	42	Ac-Stem	UAG	G	G	0.000955522	2754.67	0.00217339	0.00371	1629.67	0.00244848
EBT00001514636	LeuW	43	Ac-Stem	UAG	G	G	0.000476557	2760.67	0.00612024	0.00183144	1633.67	0.00223941
EBT00001514636	LeuW	44	V-region	UAG	C	C	0.00207813	2777.67	0.00370636	0.0053772	1637.33	0
EBT00001514636	LeuW	V1	V-region	UAG	G	G	0.000742465	2788	0.00700463	0.0056543	1637.33	0.00263959
EBT00001514636	LeuW	V2	V-region	UAG	C	C	0.00174417	2807.67	0.00578376	0.00674594	1641.67	0.00484946
EBT00001514636	LeuW	V3	V-region	UAG	C	C	0.00285006	2824	0.00247262	0.00397767	1649.67	0
EBT00001514636	LeuW	V8	V-region	UAG	G	G	0.00070382	2831	0.0116374	0.00282848	1649.67	0.0113863
[truncated: 1,733 more rows]
