# Supplementary material
Source: HighWire-hosted journal article supplement (doi:10.1101/rna.080004.124)
Supplement: SuppTable3.xlsx [file SuppTable3.xlsx]

## Sheet: 3A
Transcript ID	Name	baseMean	log2FoldChange	lfcSE	stat	pvalue	padj
EBT00001514638	CysT	54982.7	2.33357	0.117096	19.9287	2.29413e-88	1.3478e-87
EBT00001514676	GlnU	26030.6	0.862352	0.152447	5.65675	1.54267e-08	3.15241e-08
EBT00001514602	ArgQ	266361	-0.0218231	0.0767222	-0.284443	0.776071	0.792942
EBT00001514729	GlyU	14891.3	0.689198	0.127107	5.42221	5.88668e-08	1.1067e-07
EBT00001514637	ProK	14876.3	-0.261014	0.106454	-2.45189	0.0142106	0.0190828
EBT00001514679	LeuZ	17018.4	-0.00497977	0.115341	-0.0431743	0.965563	0.965563
EBT00001514749	AlaW	43273.6	0.609534	0.19897	3.06344	0.00218807	0.00354619
EBT00001514699	HisR	30549.2	-0.181292	0.294913	-0.614732	0.538732	0.588847
EBT00001514738	AsnT	77089.1	-0.510873	0.0902535	-5.66043	1.50994e-08	3.15241e-08
EBT00001514719	ValT	41672.7	0.652688	0.187419	3.48251	0.00049674	0.000833814
EBT00001514652	AlaT	103908	0.199389	0.12531	1.59116	0.111573	0.134459
EBT00001514732	GltT	25225.6	-2.64796	0.123921	-21.3682	2.64043e-101	1.77286e-100
EBT00001514624	LysQ	155511	-1.88606	0.0966227	-19.5199	7.44325e-85	3.88703e-84
EBT00001514730	LeuP	110.248	-3.41854	0.225683	-15.1475	7.86658e-52	3.08108e-51
EBT00001514592	LeuQ	737.312	-4.19641	0.166663	-25.179	6.81195e-140	5.33602e-139
EBT00001514593	IleX	5130.36	0.17066	0.101909	1.67463	0.0940077	0.116273
EBT00001514597	MetT	87221.3	-1.11194	0.101974	-10.9042	1.10062e-27	3.97915e-27
EBT00001514641	TrpT	9651.84	-0.517643	0.283608	-1.82521	0.0679695	0.0863396
EBT00001514635	ArgU	2.46598	1.66896	1.19559	1.39593	0.162734	0.186549
EBT00001514671	ArgX	1839.7	0.205434	0.13754	1.49363	0.135271	0.158944
EBT00001514721	AspT	48355.7	-0.647969	0.118898	-5.44978	5.0432e-08	9.87627e-08
EBT00001514740	GlnV	21242.9	0.662159	0.255656	2.59003	0.00959665	0.0140951
EBT00001514622	GlyT	3658.11	-4.42163	0.140879	-31.386	3.14083e-216	7.38096e-215
EBT00001514735	GlyV	155178	-2.58781	0.0958675	-26.9937	1.75368e-160	2.06058e-159
EBT00001514691	IleT	11121.8	-5.3583	0.0972272	-55.1111	0	0
EBT00001514636	LeuW	10334.4	1.46716	0.157356	9.3238	1.12248e-20	3.76833e-20
EBT00001514711	LeuU	6350.76	-2.95961	0.18342	-16.1356	1.43307e-58	6.73543e-58
EBT00001514709	LeuX	21434	-0.973501	0.106122	-9.17339	4.58394e-20	1.4363e-19
EBT00001514723	PheU	17201.7	0.664035	0.137222	4.83915	1.30399e-06	2.35721e-06
EBT00001514737	MetY	100.637	-0.116883	0.217747	-0.536785	0.591416	0.63174
EBT00001514651	MetV	294.285	0.422908	0.197214	2.14441	0.0320003	0.0417781
EBT00001514689	SerT	1827.93	-0.384732	0.135996	-2.829	0.00466938	0.00731537
EBT00001514584	SerU	610.614	0.392964	0.158278	2.48274	0.0130375	0.0180225
EBT00001514690	SerV	3450.02	1.45468	0.238841	6.09059	1.12496e-09	2.51776e-09
EBT00001514678	SerW	8069.46	1.49646	0.196207	7.62697	2.40331e-14	6.64445e-14
EBT00001514591	ThrV	71747.7	0.440542	0.0696015	6.32949	2.45977e-10	5.78046e-10
EBT00001514707	ThrT	32728.3	-2.94458	0.102406	-28.7541	8.05654e-182	1.26219e-180
EBT00001514612	TyrT	459.699	1.22001	0.170235	7.16663	7.68685e-13	1.90148e-12
EBT00001514598	TyrU	599.707	1.21411	0.16035	7.57167	3.6846e-14	9.6209e-14
EBT00001514621	ValV	11892.1	0.677546	0.0787261	8.60636	7.54173e-18	2.21538e-17
EBT00001514583	ValW	6054.75	0.130541	0.126704	1.03028	0.30288	0.338937
EBT00001514747	ArgW	11192.3	-1.47564	0.0961181	-15.3524	3.41536e-53	1.45929e-52
EBT00001514632	ProL	4273.98	0.3064	0.120292	2.54712	0.0108615	0.0154694
EBT00001514733	ProM	8469.58	0.348152	0.131363	2.65031	0.00804184	0.0121925
EBT00001514627	ThrU	56986.9	-0.547194	0.141024	-3.88015	0.000104391	0.000181718
EBT00001514734	ThrW	10.0021	0.181332	0.484646	0.374152	0.708291	0.739771
EBT00001514743	Sec	367.321	-6.26928	0.246937	-25.3881	3.40996e-142	3.20536e-141

## Sheet: 3B
Transcript ID	Name	baseMean	log2FoldChange	lfcSE	stat	pvalue	padj
EBT00001514638	CysT	13115.7	2.19946	0.177453	12.3946	2.79455e-35	1.87634e-34
EBT00001514676	GlnU	7546.07	0.621876	0.202354	3.07321	0.00211772	0.00473965
EBT00001514602	ArgQ	134756	0.575085	0.194489	2.9569	0.00310746	0.00635002
EBT00001514729	GlyU	5020.01	0.477336	0.188336	2.53449	0.0112612	0.0189027
EBT00001514637	ProK	8740.09	-0.231773	0.21462	-1.07992	0.280177	0.376238
EBT00001514679	LeuZ	11553.7	-0.121244	0.202484	-0.598784	0.549317	0.58677
EBT00001514749	AlaW	24687.6	1.59823	0.18705	8.54442	1.29179e-17	5.51945e-17
EBT00001514699	HisR	10780.8	0.25056	0.249387	1.0047	0.31504	0.411302
EBT00001514738	AsnT	39333	-0.369921	0.184184	-2.00843	0.0445974	0.0722786
EBT00001514719	ValT	32914.7	0.753585	0.166927	4.51446	6.34775e-06	1.75497e-05
EBT00001514652	AlaT	63502.5	1.35523	0.194407	6.97106	3.14567e-12	1.23205e-11
EBT00001514732	GltT	11802	-3.10547	0.173461	-17.903	1.11767e-71	1.75102e-70
EBT00001514624	LysQ	94604.5	-0.880969	0.189642	-4.64543	3.39366e-06	1.06335e-05
EBT00001514730	LeuP	244.061	-4.20164	0.458961	-9.15467	5.45227e-20	2.8473e-19
EBT00001514592	LeuQ	1835.42	-5.16457	0.289709	-17.8268	4.38119e-71	5.1479e-70
EBT00001514593	IleX	2175.15	-0.150822	0.215528	-0.699778	0.484066	0.541693
EBT00001514597	MetT	39780.1	-0.362815	0.212072	-1.71081	0.0871157	0.127951
EBT00001514641	TrpT	4233.08	-1.11798	0.256197	-4.36375	1.27851e-05	3.33833e-05
EBT00001514635	ArgU	1.45865	0.756435	3.48727	0.216913	0.828276	0.846282
EBT00001514671	ArgX	716.892	0.437784	0.242805	1.80303	0.0713833	0.108226
EBT00001514721	AspT	27890	-1.27058	0.205265	-6.18995	6.01825e-10	2.17583e-09
EBT00001514740	GlnV	7065.15	-0.257454	0.224201	-1.14832	0.250838	0.346747
EBT00001514622	GlyT	2584.13	-3.73246	0.181451	-20.5701	5.08577e-94	1.19516e-92
EBT00001514735	GlyV	76470.5	-2.20457	0.210953	-10.4505	1.45723e-25	8.56121e-25
EBT00001514691	IleT	5476.86	-4.98642	0.189001	-26.3831	2.14274e-153	1.00709e-151
EBT00001514636	LeuW	4624.88	1.29127	0.241833	5.33951	9.31981e-08	3.12879e-07
EBT00001514711	LeuU	2945.12	-3.7695	0.21519	-17.5171	1.061e-68	9.97336e-68
EBT00001514709	LeuX	13666.9	-0.0693839	0.176812	-0.392415	0.694751	0.725629
EBT00001514723	PheU	8222.12	0.824611	0.179499	4.59395	4.34936e-06	1.27762e-05
EBT00001514737	MetY	113.79	-1.27117	0.482393	-2.63515	0.00841013	0.0146399
EBT00001514651	MetV	280.883	-1.02342	0.36379	-2.81322	0.00490476	0.00922096
EBT00001514689	SerT	312.39	0.226396	0.311465	0.726875	0.467302	0.535688
EBT00001514584	SerU	179.352	0.371713	0.478192	0.77733	0.436964	0.513433
EBT00001514690	SerV	867.619	0.764271	0.260924	2.92909	0.00339956	0.00665748
EBT00001514678	SerW	2013.86	0.838562	0.254375	3.29657	0.000978749	0.00230006
EBT00001514591	ThrV	43775.7	0.643162	0.175442	3.66594	0.000246431	0.000609592
EBT00001514707	ThrT	14518.8	-2.94869	0.189739	-15.5408	1.83769e-54	1.43953e-53
EBT00001514612	TyrT	438.889	0.286235	0.318134	0.89973	0.368264	0.466739
EBT00001514598	TyrU	675.596	-0.0421118	0.291492	-0.14447	0.885129	0.885129
EBT00001514621	ValV	4720.37	0.578743	0.20817	2.78015	0.00543342	0.00982196
EBT00001514583	ValW	2055.86	-0.399162	0.211302	-1.88906	0.0588837	0.0922511
EBT00001514747	ArgW	4210.36	0.239158	0.270919	0.882764	0.377364	0.466739
EBT00001514632	ProL	2224.96	0.67003	0.222304	3.01403	0.00257799	0.00550753
EBT00001514733	ProM	4629.67	0.281666	0.178009	1.58231	0.113578	0.161762
EBT00001514627	ThrU	44605.2	0.10138	0.168643	0.601155	0.547737	0.58677
EBT00001514734	ThrW	13.3336	-0.988095	1.18715	-0.832327	0.405224	0.488347
EBT00001514743	Sec	112.057	-6.04737	0.678067	-8.91853	4.7251e-19	2.2208e-18
