# Supplementary material
Source: HighWire-hosted journal article supplement (doi:10.1101/rna.080004.124)
Supplement: SuppTable4.xlsx [file SuppTable4.xlsx]

## Sheet: Sheet1
Transcript ID	tRNA name	Annot. Pos.	Region	AC	ref base	Annot. Mods	LB Misincorporation Freq.	LB Avg. Depth	LB Term. Score	CDM Misincorporation_Freq	CDM Avg. Depth	CDM Term. Score
EBT00001514709	LeuX	32	Ac-loop	CAA	T	Y	NA	36.6667	NA	0	177.667	0
EBT00001514709	LeuX	34	Ac-loop	CAA	C	Cm	0.00303335	429.333	0.534346	0.000616143	447.667	0.330175
EBT00001514709	LeuX	37	Ac-loop	CAA	A	ms2i6A	0.169774	2006.67	0.828909	0.17703	1424.67	0.798994
EBT00001514723	PheU	32	Ac-loop	GAA	T	Y	0.00151515	278.667	0.0423826	0.000288351	1665.33	0
EBT00001514723	PheU	34	Ac-loop	GAA	G	G	0	557.333	0.185582	0.000678517	1734	0.0186757
EBT00001514723	PheU	37	Ac-loop	GAA	A	ms2i6A	0.206886	1067.33	0.727001	0.0330766	1920.33	0.311626
EBT00001514679	LeuZ	32	Ac-loop	UAA	T	Y	NA	31.6667	NA	0.045093	262.667	0.0932106
EBT00001514679	LeuZ	34	Ac-loop	UAA	T	cmnm5Um	0.00137741	383.667	0.427932	0.0733133	527	0.374109
EBT00001514679	LeuZ	37	Ac-loop	UAA	A	ms2i6A	0.246592	1256.67	0.809702	0.167994	1353.67	0.759761
EBT00001514641	TrpT	32	Ac-loop	CCA	C	Cm	0.00687794	210.667	0.0140406	0.00297695	541.667	0
EBT00001514641	TrpT	34	Ac-loop	CCA	C	C	0.0030958	211.333	0.147849	0.000695894	533.667	0.0970107
EBT00001514641	TrpT	37	Ac-loop	CCA	A	ms2i6A	0.013758	1318.33	0.670059	0.00531237	1138.67	0.470141
EBT00001514638	CysT	32	Ac-loop	GCA	T	Y	0.00240413	579	0.0230596	0.00351033	438.333	0
EBT00001514638	CysT	34	Ac-loop	GCA	G	G	0.00343933	597.333	0.172669	0.00479331	440.667	0.118079
EBT00001514638	CysT	37	Ac-loop	GCA	A	ms2i6A	0.0110975	1594.67	0.697234	0.00534135	792.333	0.54568
EBT00001514743	SelC	32	Acc-loop	UCA	C	C	NA	21	NA	NA	0	NA
EBT00001514743	SelC	34	Acc-loop	UCA	T	T	NA	21.6667	NA	NA	0	NA
EBT00001514743	SelC	37	Acc-loop	UCA	A	i6A	NA	23.6667	NA	NA	0	NA
EBT00001514584	SerU	32	Ac-loop	CGA	C	C	NA	17.3333	NA	NA	14.3333	NA
EBT00001514584	SerU	34	Ac-loop	CGA	C	C	NA	17.3333	NA	NA	14.3333	NA
EBT00001514584	SerU	37	Ac-loop	CGA	A	ms2i6A	NA	45	NA	NA	17.3333	NA
EBT00001514678	SerW	32	Ac-loop	GGA	C	C	0	410.333	0.0128308	0.00904871	160.667	0
EBT00001514678	SerW	34	Ac-loop	GGA	G	G	0.00207041	416	0.00952381	0.00323625	160.667	0
EBT00001514678	SerW	37	Ac-loop	GGA	A	A	0	526.333	0.195209	0	253.333	0.0865385
EBT00001514689	SerT	32	Ac-loop	UGA	C	Cm	NA	39	NA	NA	0	NA
EBT00001514689	SerT	34	Ac-loop	UGA	T	mcmo5U	NA	39.3333	NA	NA	6.66667	NA
EBT00001514689	SerT	37	Ac-loop	UGA	A	ms2i6A	0.0522754	140.667	0.744397	NA	40.6667	NA
EBT00001514612	TyrT	32	Ac-loop	GUA	C	C	NA	0	NA	NA	0.333333	NA
EBT00001514612	TyrT	34	Ac-loop	GUA	G	Q	NA	2.66667	NA	NA	9.66667	NA
EBT00001514612	TyrT	37	Ac-loop	GUA	A	ms2i6A	NA	18.3333	NA	NA	36	NA
EBT00001514598	TyrU	32	Ac-loop	GUA	C	C	NA	0	NA	NA	25.3333	NA
EBT00001514598	TyrU	34	Ac-loop	GUA	G	Q	NA	2.66667	NA	NA	35.3333	NA
EBT00001514598	TyrU	37	Ac-loop	GUA	A	ms2i6A	NA	26	NA	NA	75.3333	NA
EBT00001514621	ValV	32	Ac-loop	GAC	T	U	NA	29.3333	NA	NA	20.3333	NA
EBT00001514621	ValV	34	Ac-loop	GAC	G	G	NA	32.3333	NA	NA	20.6667	NA
EBT00001514621	ValV	37	Ac-loop	GAC	A	A	0	1350.67	0.461385	0	561.667	0.569494
EBT00001514583	ValW	32	Ac-loop	GAC	T	U	NA	27	NA	NA	13	NA
EBT00001514583	ValW	34	Ac-loop	GAC	G	G	NA	29.3333	NA	NA	8	NA
EBT00001514583	ValW	37	Ac-loop	GAC	A	A	0	1215.67	0.409966	0.00769601	549	0.453369
EBT00001514719	ValT	32	Ac-loop	UAC	C	C	0.00104218	5334.33	0.139439	0.00165569	4767.33	0.103323
EBT00001514719	ValT	34	Ac-loop	UAC	T	cmo5U	0.00204467	6464.67	0.0194651	0.0043697	5574.33	0.0115262
EBT00001514719	ValT	37	Ac-loop	UAC	A	m6A	0.000805415	9910.67	0.172295	0.000766159	8147	0.226036
EBT00001514729	GlyU	32	Ac-loop	CCC	T	U	0.00326112	501	0.0278137	0.00359103	177.667	0.0549645
EBT00001514729	GlyU	34	Ac-loop	CCC	C	C	0.0140771	531.667	0.166231	0.022797	187.333	0.124611
EBT00001514729	GlyU	37	Ac-loop	CCC	A	A	0.000554455	3861.67	0.275122	0.00030303	1317	0.353778
EBT00001514735	GlyV	32	Ac-loop	GCC	T	U	0.00122899	4937.67	0.0217276	0.00257889	3622.67	0
EBT00001514735	GlyV	34	Ac-loop	GCC	G	G	0.067868	5600	0.785911	0.0848942	3818	0.677434
EBT00001514735	GlyV	37	Ac-loop	GCC	A	A	0.000120527	133164	0.076906	8.07e-05	72276.3	0.0987764
EBT00001514622	GlyT	32	Ac-loop	UCC	C	C	0.000947291	2090	0.115781	0.0015916	1862.33	0.0592692
EBT00001514622	GlyT	34	Ac-loop	UCC	T	mnm5U	0.00584095	2418.67	0.0161356	0.00239341	2003.67	0.0141053
EBT00001514622	GlyT	37	Ac-loop	UCC	A	A	0.000471986	3067.67	0.0457279	0.00107892	2494.33	0.0556537
EBT00001514749	AlaW	32	Ac-loop	GGC	A	A	0	350.667	0.567612	0.00193951	460.667	0.130818
EBT00001514749	AlaW	34	Ac-loop	GGC	G	G	0.00368657	980.667	0.240578	0.00254068	547.667	0.144716
EBT00001514749	AlaW	37	Ac-loop	GGC	A	A	0.000149049	16309.3	0.0996283	0.000143538	6977	0.0923637
EBT00001514652	AlaT	32	Ac-loop	UGC	T	U	0.0015525	1678.33	0.0516105	0.00403875	1027.67	0.0112251
EBT00001514652	AlaT	34	Ac-loop	UGC	T	mcmo5U	0.00423331	1819.67	0.027263	0.00368856	1075.67	0.0170576
EBT00001514652	AlaT	37	Ac-loop	UGC	A	A	0.000603847	8311.33	0.656121	0.000690732	3747.33	0.670332
EBT00001514721	AspT	32	Ac-loop	GUC	C	C	0.00153809	1463.33	0.0651618	0.00070972	1869.67	0.00988526
EBT00001514721	AspT	34	Ac-loop	GUC	G	Glu-Q	0.00296066	1575.33	0.282526	0.00261823	1916	0.184681
EBT00001514721	AspT	37	Ac-loop	GUC	A	m2A	0.00156871	7083.33	0.528574	0.00305057	5841.33	0.573936
EBT00001514732	GltT	32	Ac-loop	UUC	C	C	0.00145771	4691.33	0.260703	0.00352751	3607	0.190832
EBT00001514732	GltT	34	Ac-loop	UUC	T	mnm5s2U	0.0139232	7226.67	0.0816672	0.00989816	4969	0.0568175
EBT00001514732	GltT	37	Ac-loop	UUC	A	m2A	0.00272508	10468	0.24366	0.002345	6414	0.255312
EBT00001514730	LeuP	32	Ac-loop	CAG	T	U	NA	7.33333	NA	NA	20	NA
EBT00001514730	LeuP	34	Ac-loop	CAG	C	C	NA	8	NA	NA	20	NA
EBT00001514730	LeuP	37	Ac-loop	CAG	G	ac4C	NA	10	NA	NA	21.6667	NA
EBT00001514592	LeuQ	32	Ac-loop	CAG	T	U	NA	41	NA	0	120	0
EBT00001514592	LeuQ	34	Ac-loop	CAG	C	C	NA	47.6667	NA	0	120.333	0.0997506
EBT00001514592	LeuQ	37	Ac-loop	CAG	G	m1G	NA	66	NA	0.705039	149	0.918117
EBT00001514711	LeuU	32	Ac-loop	GAG	T	U	0.00167911	480.333	0.0217244	0.00209084	712	0
EBT00001514711	LeuU	34	Ac-loop	GAG	G	G	0.00295201	498.333	0.0279584	0.0280034	714.333	0
EBT00001514711	LeuU	37	Ac-loop	GAG	G	m1G	0.510993	532	0.71403	0.548088	731	0.508737
EBT00001514636	LeuW	32	Ac-loop	UAG	T	U	0.00186553	885.333	0.0938246	0.00599109	501	0.0321958
EBT00001514636	LeuW	34	Ac-loop	UAG	T	cmo5U	0.0139035	1035.67	0.00480461	0.0027836	517.667	0
EBT00001514636	LeuW	37	Ac-loop	UAG	G	m1G	0.724145	1050.33	0.596026	0.79978	518.667	0.656815
EBT00001514602	ArgQ	32	Ac-loop	ACG	C	s2C	0.0148664	4340.33	0.00724306	0.00374109	2283.67	0
EBT00001514602	ArgQ	34	Ac-loop	ACG	A	I	0.986544	4364.67	0.214611	0.990297	2287.67	0.0851773
EBT00001514602	ArgQ	37	Ac-loop	ACG	A	m2A	0.000990798	15093	0.487243	0.00286426	5457	0.542812
EBT00001514671	ArgX	32	Ac-loop	CCG	C	s2C	NA	46.3333	NA	NA	15.6667	NA
EBT00001514671	ArgX	34	Ac-loop	CCG	C	C	NA	57	NA	NA	15.6667	NA
EBT00001514671	ArgX	37	Ac-loop	CCG	G	m1G	0.185037	126.667	0.721203	NA	35	NA
EBT00001514637	ProK	32	Ac-loop	CGG	T	Um	0.0116254	513	0.0936396	0.0451758	312.333	0.100768
EBT00001514637	ProK	34	Ac-loop	CGG	C	C	0.00363667	579.333	0	0.00311526	345.333	0
EBT00001514637	ProK	37	Ac-loop	CGG	G	m1G	0.506213	822.333	0.846723	0.494729	409.333	0.882925
EBT00001514632	ProL	32	Ac-loop	GGG	A	A	0	289	0.0472527	0	298.333	0.00111607
EBT00001514632	ProL	34	Ac-loop	GGG	G	G	0.00134409	280.333	0.100535	0.00517314	252.333	0.15419
EBT00001514632	ProL	37	Ac-loop	GGG	G	G	0.402026	369	0.718177	0.422182	302	0.548805
EBT00001514733	ProM	32	Ac-loop	UGG	T	Um	0.00574579	1149.67	0.0807569	0.0139812	648.333	0.0658021
EBT00001514733	ProM	34	Ac-loop	UGG	T	mcmo5U	0.00185581	1269	0	0.00479604	695	0
EBT00001514733	ProM	37	Ac-loop	UGG	G	G	0.636859	1456.33	0.57677	0.56907	792.667	0.642782
EBT00001514740	GlnV	32	Ac-loop	CUG	T	Um	0.00427483	566	0.00991254	0.010361	390	0.025
EBT00001514740	GlnV	34	Ac-loop	CUG	C	C	0.0281024	580.667	0.135913	0.0196067	400.333	0
EBT00001514740	GlnV	37	Ac-loop	CUG	A	m2A	0.000760872	2824	0.609027	0.00150767	1470	0.645413
EBT00001514699	HisR	32	Ac-loop	GUG	T	U	0.00113184	2739.67	0.010236	0.00247418	1916.67	0.00242887
EBT00001514699	HisR	34	Ac-loop	GUG	G	Q	0.0103373	2780.33	0.0301163	0.0151724	1921.67	0.00740358
EBT00001514699	HisR	37	Ac-loop	GUG	A	m2A	0.00137981	6533	0.523579	8.04e-05	2840	0.353713
EBT00001514676	GlnU	32	Ac-loop	UUG	T	Um	0.000478273	2512.67	0.227585	0.0162499	280.333	0.10911
EBT00001514676	GlnU	34	Ac-loop	UUG	T	cmnm5s2U	0.0233516	3649.67	0.0584745	0.0246718	336	0.0127326
EBT00001514676	GlnU	37	Ac-loop	UUG	A	m2A	0.00120653	5442.33	0.331846	0.000252525	1128	0.576524
EBT00001514593	IleX	32	Ac-loop	CAU	C	C	NA	5.66667	NA	NA	0	NA
EBT00001514593	IleX	34	Ac-loop	CAU	C	k2C	NA	37.6667	NA	NA	19.6667	NA
EBT00001514593	IleX	37	Ac-loop	CAU	A	ct6A	0.0658005	370.333	0.673907	0.0741023	189	0.651506
EBT00001514597	MetT	32	Ac-loop	CAU	C	C	0.00188113	599	0.208719	0.00166667	237	0.0742188
EBT00001514597	MetT	34	Ac-loop	CAU	C	ac4C	0.00178392	1415	0.661753	0.000877314	742	0.531861
EBT00001514597	MetT	37	Ac-loop	CAU	A	ct6A	0.0722026	9114	0.751892	0.17617	3083.33	0.780123
EBT00001514651	MetV	32	Ac-loop	CAU	C	Cm	NA	3.66667	NA	NA	25.3333	NA
EBT00001514651	MetV	34	Ac-loop	CAU	C	C	NA	5.66667	NA	NA	26.6667	NA
EBT00001514651	MetV	37	Ac-loop	CAU	A	A	NA	94.3333	NA	0.0157788	133	0.278481
EBT00001514737	MetY	32	Ac-loop	CAU	C	Cm	NA	0	NA	NA	1	NA
EBT00001514737	MetY	34	Ac-loop	CAU	C	C	NA	1	NA	NA	1.33333	NA
EBT00001514737	MetY	37	Ac-loop	CAU	A	A	NA	38.3333	NA	NA	59	NA
EBT00001514691	IleT	32	Ac-loop	GAU	C	C	0.00217263	643	0.0291897	0.00132275	305	0.00326797
EBT00001514691	IleT	34	Ac-loop	GAU	G	G	0.00191986	710.333	0.522518	0.00449339	346.667	0.468846
EBT00001514691	IleT	37	Ac-loop	GAU	A	ct6A	0.0163264	2810	0.506296	0.045573	1143	0.606946
EBT00001514747	ArgW	32	Ac-loop	CCU	C	C	0.0237033	266.667	0.171843	NA	67.6667	NA
EBT00001514747	ArgW	34	Ac-loop	CCU	C	C	0.00731846	341	0.0750452	NA	82.6667	NA
EBT00001514747	ArgW	37	Ac-loop	CCU	A	A	0.00134994	1453.67	0.672696	0	318.667	0.779724
EBT00001514690	SerV	32	Ac-loop	GCU	C	s2C	0.02049	395.667	0.0206271	0	135.333	0
EBT00001514690	SerV	34	Ac-loop	GCU	G	G	0.0035581	404	0.00655738	0	135.333	0
EBT00001514690	SerV	37	Ac-loop	GCU	A	ct6A	0	432.667	0.144364	0	169.667	0.0894454
EBT00001514635	ArgU	32	Ac-loop	UCU	C	s2C	NA	0.5	NA	NA	1	NA
EBT00001514635	ArgU	34	Ac-loop	UCU	T	mnm5U	NA	1	NA	NA	1	NA
EBT00001514635	ArgU	37	Ac-loop	UCU	A	ct6A	NA	1	NA	NA	1	NA
EBT00001514734	ThrW	32	Ac-loop	CGU	T	U	NA	1.66667	NA	NA	2.66667	NA
EBT00001514734	ThrW	34	Ac-loop	CGU	C	C	NA	1.66667	NA	NA	2	NA
EBT00001514734	ThrW	37	Ac-loop	CGU	A	ct6A	NA	2.33333	NA	NA	4.33333	NA
EBT00001514707	ThrT	32	Ac-loop	GGU	T	U	0.000122324	10959.3	0.110877	0.000435666	4179.33	0.0913176
EBT00001514707	ThrT	34	Ac-loop	GGU	G	G	0.000879932	12412.7	0.0136413	0.000992863	4623.67	0.0163109
EBT00001514707	ThrT	37	Ac-loop	GGU	A	m6t6A	0.00286664	19355	0.31851	0.00196186	8499.33	0.431305
EBT00001514591	ThrV	32	Ac-loop	GGU	T	U	0.00012973	11911.3	0.112221	0.000483978	6137.33	0.0953223
EBT00001514591	ThrV	34	Ac-loop	GGU	G	G	0.000520246	13526.7	0.0144026	0.00140188	6849.33	0.0137749
EBT00001514591	ThrV	37	Ac-loop	GGU	A	m6t6A	0.00326984	20429.7	0.318458	0.00321713	11971.7	0.414073
EBT00001514627	ThrU	32	Ac-loop	UGU	C	Cm	0.00104012	991	0.278048	0.00375309	895	0.170272
EBT00001514627	ThrU	34	Ac-loop	UGU	T	mcmo5U	0.00212273	1392.33	0.359159	0.00371181	1094.67	0.439495
EBT00001514627	ThrU	37	Ac-loop	UGU	A	A	0.00111142	5183	0.699559	0.00373631	3887	0.680451
EBT00001514738	AsnT	32	Ac-loop	GUU	C	C	0.00146444	2811.67	0.29591	0.00357323	2755.33	0.0886439
EBT00001514738	AsnT	34	Ac-loop	GUU	G	Q	0.0016374	4647.33	0.469503	0.00154786	3493	0.34375
EBT00001514738	AsnT	37	Ac-loop	GUU	A	ct6A	0.0514034	12661.3	0.621077	0.0802972	7174.67	0.624101
EBT00001514624	LysQ	32	Ac-loop	UUU	C	C	0.00152277	2941.33	0.583715	0.00150563	1326.33	0.506328
EBT00001514624	LysQ	34	Ac-loop	UUU	T	mnm5s2U	0.00284619	12225.3	0.228442	0.0012148	4715.67	0.302897
EBT00001514624	LysQ	37	Ac-loop	UUU	A	ct6A	0.222993	22408	0.602857	0.207882	10798.7	0.647877
