# Supplementary material
Source: HighWire-hosted journal article supplement (doi:10.1101/rna.080004.124)
Supplement: SuppTable5.xlsx [file SuppTable5.xlsx]

## Sheet: Sheet1
Transcript ID	tRNA name	ref base	Annot. Pos.	Region	AC	Annot. Mods	LB misincorporation freq.	LB Avg. Depth	LB Term. Score	CDM Misincorporation Freq.	CDM Avg. Depth	CDM Term. Score
EBT00001514652	AlaT	G	46	V-region	UGC	m7G	0.00220578	54595.3	0.00937485	0.00402413	23906.3	0.00870779
EBT00001514652	AlaT	T	47	V-region	UGC	U	0.0011355	55112	0.000562175	0.0055453	24116.3	0.00091141
EBT00001514749	AlaW	G	46	V-region	GGC	m7G	0.00258397	19278	0.00836734	0.00410309	8266.33	0.0129751
EBT00001514749	AlaW	T	47	V-region	GGC	U	0.000973354	19440.7	0.000668254	0.00636226	8375	0.00023875
EBT00001514602	ArgQ	G	46	V-region	ACG	m7G	0.0010157	68198.3	0.245641	0.00251792	29569	0.417895
EBT00001514602	ArgQ	T	47	V-region	ACG	acp3U	0.298655	90405.7	0.325064	0.18528	50796.7	0.305721
EBT00001514747	ArgW	A	46	V-region	CCU	0	0.000306031	9274	0.00322442	0.000341501	2653.33	0.00834683
EBT00001514747	ArgW	T	47	V-region	CCU	0	0.00140204	9304	0.00035814	0.00507636	2675.67	0.00161692
EBT00001514671	ArgX	G	46	V-region	CCG	m7G	0	842.333	0.066839	0	383.333	0.0650407
EBT00001514671	ArgX	T	47	V-region	CCG	U	0.0478169	902.667	0.0293907	0.0240397	410	0.0136327
EBT00001514738	AsnT	G	46	V-region	GUU	m7G	0.0024378	50800.7	0.0045201	0.00399309	30043	0.00463837
EBT00001514738	AsnT	T	47	V-region	GUU	U	0.00122717	51031.3	0.000489655	0.00449111	30183	1.1e-05
EBT00001514721	AspT	G	46	V-region	GUC	m7G	0.00175258	32688.7	0.0182797	0.00296736	26185.7	0.0297293
EBT00001514721	AspT	T	47	V-region	GUC	U	0.00777007	33297.3	0.00320318	0.00489482	26988	0.00109805
EBT00001514638	CysT	A	46	V-region	GCA	A	0.000216295	10278.7	0.00132785	0.000407458	3193.67	0.00093848
EBT00001514676	GlnU	T	46	V-region	UUG	U	0.00129072	10298	0.00303343	0.00331103	4022.33	0.00198495
EBT00001514676	GlnU	T	47	V-region	UUG	U	0.00165314	10329.3	0.00096718	0.0046236	4030.33	0.0014865
EBT00001514740	GlnV	T	46	V-region	CUG	U	0.00105423	9175.33	0.00434059	0.00399843	5266.67	0.00176902
EBT00001514740	GlnV	T	47	V-region	CUG	U	0.00118373	9215.33	0.00144477	0.00524611	5276	0.00113593
EBT00001514732	GltT	A	46	V-region	UUC	A	0.00087859	22998.3	0.0217915	0.00140755	13423.3	0.0316685
EBT00001514622	GlyT	A	46	V-region	UCC	A	0.000455358	3795	0.0251734	0.000939367	3175.67	0.0305281
EBT00001514729	GlyU	A	46	V-region	CCC	A	0.000289567	6414	0.000727046	0.000241822	2835.33	0.00058748
EBT00001514735	GlyV	G	46	V-region	GCC	m7G	0.00222745	150691	0.00477719	0.00323664	85483.3	0.00493941
EBT00001514735	GlyV	T	47	V-region	GCC	U	0.00363599	151414	0.00071057	0.00473784	85907.7	0.00052742
EBT00001514699	HisR	G	46	V-region	GUG	m7G	0.00555921	16856.7	0.0483449	0.0185879	5456	0.159883
EBT00001514699	HisR	T	47	V-region	GUG	U	0.00719558	17713	0.0157622	0.00398546	6494.33	0.0156621
EBT00001514691	IleT	G	46	V-region	GAU	m7G	0.000745661	7457.33	0.222006	0.00659642	3878.33	0.381578
EBT00001514691	IleT	T	47	V-region	GAU	acp3U	0.428171	9585.33	0.125373	0.231315	6271.33	0.121703
EBT00001514593	IleX	G	46	V-region	CAU	m7G	0.000954372	1659.33	0.207577	0.00161154	892	0.336803
EBT00001514593	IleX	T	47	V-region	CAU	acp3U	0.438204	2094	0.148896	0.327936	1345	0.11784
EBT00001514730	LeuP	G	46	V-region	CAG	G	0	115.667	0	0	319	0
EBT00001514592	LeuQ	G	46	V-region	CAG	0	0	810	0	0	2445	0
EBT00001514711	LeuU	T	46	V-region	GAG	U	0.000271914	6071	0.0271353	0.00527873	3588.33	0.0211857
EBT00001514636	LeuW	G	46	V-region	UAG	0	0.00172664	3082.33	0.0171131	0.00153754	1794.67	0.00590842
EBT00001514709	LeuX	G	46	V-region	CAA	G	0.0019692	16142.7	0.00482913	0.00202548	9572.33	0.00114783
EBT00001514679	LeuZ	T	46	V-region	UAA	U	0.000555916	9509.33	0.000665569	0.00286271	8208.67	0.00052762
EBT00001514679	LeuZ	G	47	V-region	UAA	G	0.00290688	9515.67	0.0186325	0.00350801	8213	0.0052485
EBT00001514624	LysQ	G	46	V-region	UUU	m7G	0.00115194	103673	0.12743	0.00291474	68008.7	0.128541
EBT00001514624	LysQ	T	47	V-region	UUU	acp3U	0.265415	118813	0.0846315	0.118981	78040	0.054729
EBT00001514597	MetT	G	46	V-region	CAU	m7G	0.00077984	48764	0.0828548	0.00157516	19309.3	0.204504
EBT00001514597	MetT	T	47	V-region	CAU	acp3U	0.535721	53169.3	0.158789	0.44733	24273.3	0.15888
EBT00001514651	MetV	G	46	V-region	CAU	m7G	0.002331	141.667	0	0	250.667	0.00265252
EBT00001514651	MetV	T	47	V-region	CAU	U	0	141.667	0	0	251.333	0.0026455
EBT00001514723	PheU	G	46	V-region	GAA	m7G	0.00129848	4462.33	0.222229	0.00559051	3102.33	0.190766
EBT00001514723	PheU	T	47	V-region	GAA	acp3U	0.124924	5737.33	0.125895	0.0367106	3833.67	0.0566765
EBT00001514637	ProK	G	46	V-region	CGG	m7G	0.00838015	8169	0.0944798	0.013565	5693.67	0.113964
EBT00001514637	ProK	T	47	V-region	CGG	U	0.00440824	9021.33	0.00195449	0.0250554	6426	0.0031027
EBT00001514632	ProL	G	46	V-region	GGG	0	0.00253313	2148	0.00952966	0.00536976	1148.33	0.0109101
EBT00001514632	ProL	T	47	V-region	GGG	0	0.0011913	2168.67	0.000307314	0.00371667	1161	0
EBT00001514733	ProM	G	46	V-region	UGG	0	0.0110771	3970.33	0.0444444	0.021079	2640.33	0.0349659
EBT00001514733	ProM	T	47	V-region	UGG	0	0.00649685	4155	0.00248079	0.022073	2736	0.00048709
EBT00001514707	ThrT	G	46	V-region	GGU	m7G	0.00361174	32093.7	0.0142617	0.00652605	17222.3	0.0211803
EBT00001514707	ThrT	T	47	V-region	GGU	U	0.00963136	32558	0.00197206	0.00806347	17595	0.00215505
EBT00001514627	ThrU	G	46	V-Region	UGU	0	0.00177115	37565.3	0.0145592	0.00277684	29473.3	0.013907
EBT00001514627	ThrU	T	47	V-Region	UGU	0	0.00153614	38120.3	0.000664121	0.00503502	29889	0.0003456
EBT00001514591	ThrV	G	46	V-region	GGU	m7G	0.00276452	33595	0.01101	0.00571203	23291	0.0102133
EBT00001514591	ThrV	T	47	V-region	GGU	0	0.00128406	33969	0.000794211	0.0044792	23531.3	0
EBT00001514641	TrpT	G	46	V-region	CCA	m7G	0.00196517	6403.67	0.0110676	0.00324127	3832.33	0.0109257
EBT00001514641	TrpT	T	47	V-region	CCA	U	0.00137653	6475.33	0.000668759	0.00553674	3874.67	0.00197476
EBT00001514612	TyrT	T	46	V-region	GUA	U	0	158	0	0.000805153	277.333	0
EBT00001514612	TyrT	T	47	V-region	GUA	U	0	158	0	0	277.333	0
EBT00001514598	TyrU	T	46	V-region	GUA	U	0	206.333	0	0	478.333	0
EBT00001514598	TyrU	T	47	V-region	GUA	U	0	206.333	0	0.0014905	478.333	0
EBT00001514719	ValT	G	46	V-region	UAC	m7G	0.00261132	17830	0.0254168	0.00530884	15981.7	0.0301798
EBT00001514719	ValT	T	47	V-region	UAC	U	0.00180964	18295	0.00247178	0.00544915	16479	0.0013736
EBT00001514621	ValV	G	46	V-region	GAC	m7G	0.00108876	3181.33	0.190294	0.00392729	1766.33	0.249965
EBT00001514621	ValV	T	47	V-region	GAC	acp3U	0.202333	3929	0.104263	0.0973973	2355	0.0694152
EBT00001514583	ValW	G	46	V-region	GAC	m7G	0.00217043	2478.33	0.133147	0.00596594	1224.67	0.184099
EBT00001514583	ValW	T	47	V-region	GAC	acp3U	0.200697	2859	0.0668045	0.098458	1501	0.0563705
