# Supplementary material
Source: HighWire-hosted journal article supplement (doi:10.1101/rna.080004.124)
Supplement: SuppTable6.xlsx [file SuppTable6.xlsx]

## Sheet: 6A
>EBT00051365344 ncrna chromosome:ASM1462v1:Chromosome:312961:313034:-1 gene:PA14_03410 gene_biotype:tRNA transcript_biotype:tRNA description:tRNA-Arg_CCG
GCATCCGTAGCTCAGCTGGATAGAGTACTGCCCTCCGAAGGCAGGGGTCGTGGGTTCGAATCCCGCCGGATGCGCCA
>EBT00051365099 ncrna chromosome:ASM1462v1:Chromosome:640410:640483:-1 gene:PA14_07470 gene_biotype:tRNA transcript_biotype:tRNA description:tRNA-Met_CAT
GGGCCTATAGCTCAGTCGGTTAGAGCAGAGGACTCATAATCCTTTGGTCCACGGTTCGAGTCCGTGTGGGCCCACCA
>EBT00051370091 ncrna chromosome:ASM1462v1:Chromosome:734686:734759:1 gene:PA14_08580 gene_biotype:tRNA transcript_biotype:tRNA description:tRNA-Ile_GAT
GGGTCTGTAGCTCAGTTGGTTAGAGCGCACCCCTGATAAGGGTGAGGTCGGCAGTTCGAATCTGCCCAGACCCACCA
>EBT00051369932 ncrna chromosome:ASM1462v1:Chromosome:734791:734863:1 gene:PA14_08590 gene_biotype:tRNA transcript_biotype:tRNA description:tRNA-Ala_TGC
GGGGCCATAGCTCAGCTGGGAGAGCGCCTGCTTTGCACGCAGGAGGTCAGGAGTTCGATCCTCCTTGGCTCCACCA
>EBT00051369986 ncrna chromosome:ASM1462v1:Chromosome:740947:741028:1 gene:PA14_08650 gene_biotype:tRNA transcript_biotype:tRNA description:tRNA-Tyr_GTA
GGAGGGATTCCCGAGTGGCCAAAGGGATCAGACTGTAAATCTGACGTCATAGACTTCGAAGGTTCGAATCCTTCTCCCTCCACCA
>EBT00051367609 ncrna chromosome:ASM1462v1:Chromosome:741058:741128:1 gene:PA14_08660 gene_biotype:tRNA transcript_biotype:tRNA description:tRNA-Gly
GCGGGTATAGTTCAGTGGTAGAGCCTCAGCCTTCCAAGCTGATGATGCGGGTTCGATTCCCGCTACCCGCTCCA
>EBT00051369609 ncrna chromosome:ASM1462v1:Chromosome:741151:741223:1 gene:PA14_08670 gene_biotype:tRNA transcript_biotype:tRNA description:tRNA-Thr_GGT
GCTCATGTAGCTCAGTTGGTAGAGCACACCCTTGGTAAGGGTGAGGTCAGCGGTTCAAATCCGCTCATGAGCTCCA
>EBT00051366328 ncrna chromosome:ASM1462v1:Chromosome:742560:742632:1 gene:PA14_08690 gene_biotype:tRNA transcript_biotype:tRNA description:tRNA-Trp_CCA
AGGCCAGTAGCTCAATTGGCAGAGCGGCGGTCTCCAAAACCGCAGGTTGGGGGTTCGATTCCCTCCTGGCCTGCCA
>EBT00051367914 ncrna chromosome:ASM1462v1:Chromosome:1244743:1244826:-1 gene:PA14_14570 gene_biotype:tRNA transcript_biotype:tRNA description:tRNA-Leu_CAA
GCCTCGGTGGCGGAATCGGTAGACGCGGCGGATTCAAAATCCGTTTCTGGCGACAGAGTGAGAGTTCGAGTCTCTCCCGAGGCACCA
>EBT00051366603 ncrna chromosome:ASM1462v1:Chromosome:1760535:1760608:1 gene:PA14_20500 gene_biotype:tRNA transcript_biotype:tRNA description:tRNA-Arg_CCT
GTCCCGGTAGCTCAATTGGATAGAGCATCCCCCTCCTAAGGGGAAGGTTGGAGGTTCGACCCCTCTCCGGGACGCCA
>EBT00051366399 ncrna chromosome:ASM1462v1:Chromosome:1896332:1896404:1 gene:PA14_21800 gene_biotype:tRNA transcript_biotype:tRNA description:tRNA-Val_TAC
GGGTGATTAGCTCAGCTGGGAGAGCATCTGCCTTACAAGCAGAGGGTCGGCGGTTCGATCCCGTCATCACCCACCA
>EBT00051365908 ncrna chromosome:ASM1462v1:Chromosome:1896424:1896497:1 gene:PA14_21810 gene_biotype:tRNA transcript_biotype:tRNA description:tRNA-Asp_GTC
GCAGCGGTAGTTCAGTCGGTTAGAATACCGGCCTGTCACGCCGGGGGTCGCGGGTTCGAGTCCCGTCCGCTGCGCCA
>EBT00051369492 ncrna chromosome:ASM1462v1:Chromosome:2044203:2044275:-1 gene:PA14_23490 gene_biotype:tRNA transcript_biotype:tRNA description:tRNA-Asn_GTT
TCCGCGATAGCTCAGTCGGTAGAGCAAATGACTGTTAATCATTGGGTCCCTGGTTCGAGTCCAGGTCGCGGAGCCA
>EBT00051366465 ncrna chromosome:ASM1462v1:Chromosome:2053367:2053439:1 gene:PA14_23570 gene_biotype:tRNA transcript_biotype:tRNA description:tRNA-Ala_GGC
GGGGCTATAGCTCAGCTGGGAGAGCGCTTGCATGGCATGCAAGAGGTCGACGGTTCGATCCCGTCTAGCTCCACCA
>EBT00051366923 ncrna chromosome:ASM1462v1:Chromosome:2053489:2053561:1 gene:PA14_23580 gene_biotype:tRNA transcript_biotype:tRNA description:tRNA-Glu_TTC
GTCCCCTTCGTCTAGTGGCCTAGGACACCGCCCTTTCACGGCGGTAACAGGGGTTCGAGTCCCCTAGGGGACGCCA
>EBT00051368550 ncrna chromosome:ASM1462v1:Chromosome:2174092:2174165:-1 gene:PA14_24870 gene_biotype:tRNA transcript_biotype:tRNA description:tRNA-Pro_CGG
CGGAGCGTAGCGCAGCTTGGTAGCGCGTCTCGTTCGGGACGAGAAGGTCGCTGGTTCGAATCCAGTCGCTCCGACCA
>EBT00051368683 ncrna chromosome:ASM1462v1:Chromosome:2362888:2362974:-1 gene:PA14_27190 gene_biotype:tRNA transcript_biotype:tRNA description:tRNA-Ser_GGA
GGTGAGGTGTCCGAGTGGTTGAAGGAGCACGCCTGGAAAGTGTGTATACGGGAAACCGTATCGAGGGTTCGAATCCCTCCCTCACCGCCA
>EBT00051365503 ncrna chromosome:ASM1462v1:Chromosome:2440744:2440817:1 gene:PA14_28190 gene_biotype:tRNA transcript_biotype:tRNA description:tRNA-Val_GAC
AGGCACGTAGCTCAGTTGGTTAGAGCACCACCTTGACATGGTGGGGGTCGTTGGTTCGAATCCAATCGTGCCTACCA
>EBT00051369841 ncrna chromosome:ASM1462v1:Chromosome:2474588:2474661:1 gene:PA14_28740 gene_biotype:tRNA transcript_biotype:tRNA description:tRNA-Pro_GGG
CGGGGCGTAGCGCAGCCTGGTAGCGCACTTGCATGGGGTGCAAGGGGTCGAGTGTTCGAATCACTCCGTCCCGACCA
>EBT00051365018 ncrna chromosome:ASM1462v1:Chromosome:2634238:2634324:1 gene:PA14_30420 gene_biotype:tRNA transcript_biotype:tRNA description:tRNA-Ser_TGA
GGAGGTGTGGCCGAGTGGTTTAAGGCAACGGTCTTGAAAACCGTCGAAGGGGAGACTCTTCCGTGAGTTCGAATCTCACCGCCTCCGCCA
>EBT00051367353 ncrna chromosome:ASM1462v1:Chromosome:2658638:2658710:1 gene:PA14_30680 gene_biotype:tRNA transcript_biotype:tRNA description:tRNA-Gly_GCC
GCGGGAATAGCTCAGTTGGTAGAGCACGACCTTGCCAAGGTCGGGGTCGCGAGTTCGAGTCTCGTTTCCCGCTCCA
>EBT00051365422 ncrna chromosome:ASM1462v1:Chromosome:2665032:2665102:1 gene:PA14_30720 gene_biotype:tRNA transcript_biotype:tRNA description:tRNA-Cys_GCA
GGCTGAGTAGCAGAGTGGTTATGCACCGGATTGCAAATCCGTGAACGCCGGTTCGATTCCGACCTCAGCCTCCA
>EBT00051365808 ncrna chromosome:ASM1462v1:Chromosome:3675521:3675594:-1 gene:PA14_41200 gene_biotype:tRNA transcript_biotype:tRNA description:tRNA-Asp_GTC
GGAGCGGTAGTTCAGTCGGTTAGAATACCGGCCTGTCACGCCGGGGGTCGCGGGTTCGAGTCCCGTCCGCTCCGCCA
>EBT00051368205 ncrna chromosome:ASM1462v1:Chromosome:3687017:3687098:-1 gene:PA14_41320 gene_biotype:tRNA transcript_biotype:tRNA description:tRNA-Leu_TAG
GCGGACGTGGTGGAATTGGTAGACACACTGGATTTAGGTTCCAGCGCCGCAAGGCGTGAGAGTTCGAGTCTCTCCGTCCGCACCA
>EBT00051369258 ncrna chromosome:ASM1462v1:Chromosome:3687156:3687228:-1 gene:PA14_41330 gene_biotype:tRNA transcript_biotype:tRNA description:tRNA-His_GTG
GTGGGCGTAGCTCAGTTGGTAGAGCACAGGATTGTGGCTCCTGGTGTCGTGGGTTCGATTCCCATCGTCCACCCCA
>EBT00051365670 ncrna chromosome:ASM1462v1:Chromosome:3687283:3687356:-1 gene:PA14_41340 gene_biotype:tRNA transcript_biotype:tRNA description:tRNA-Arg_TCT
GCGCCCGTAGCTCAGCTGGATAGAGCATCCGCCTTCTAAGCGGATGGTCGCAGGTTCGAGTCCTGCCGGGTGCGCCA
>EBT00051364934 ncrna chromosome:ASM1462v1:Chromosome:4552978:4553064:-1 gene:PA14_51230 gene_biotype:tRNA transcript_biotype:tRNA description:tRNA-Ser_CGA
GGAGAGATGCCGGAGTGGTCGAACGGGACGGATTCGAAATCCGTTGAGTCAGCAATGGCTCCTAGGGTTCAAATCCCTATCTCTCCGCCA
>EBT00051365187 ncrna chromosome:ASM1462v1:Chromosome:4591106:4591178:-1 gene:PA14_51660 gene_biotype:tRNA transcript_biotype:tRNA description:tRNA-Lys_TTT
GGGTCGTTAGCTCAGTCGGTAGAGCAGTTGGCTTTTAACCAATTGGTCGTAGGTTCGAATCCTACACGACCCACCA
>EBT00051369657 ncrna chromosome:ASM1462v1:Chromosome:4643754:4643827:1 gene:PA14_52320 gene_biotype:tRNA transcript_biotype:tRNA description:tRNA-Met_CAT
CGCGGGATGGAGCAGTCTGGTAGCTCGTCGGGCTCATAACCCGAAGGTCGTTGGTTCAAATCCAGCTCCCGCAACCA
>EBT00051366843 ncrna chromosome:ASM1462v1:Chromosome:4659862:4659935:-1 gene:PA14_52540 gene_biotype:tRNA transcript_biotype:tRNA description:tRNA-Arg_ACG
GCACTCATAGCTCAGCTGGATAGAGTACTCGGCTACGAACCGAGCGGTCGGAGGTTCGAATCCTCCTGAGTGCGCCA
>EBT00051366536 ncrna chromosome:ASM1462v1:Chromosome:4660244:4660331:-1 gene:PA14_52560 gene_biotype:tRNA transcript_biotype:tRNA description:tRNA-Ser_GCT
GGAGAGGTGGCCGAGTGGCCGAAGGCGCTCCCCTGCTAAGGGAGTACACCTCAAAAGGGTGTCGGGGGTTCGAATCCCCCCCTCTCCGCCA
>EBT00051368279 ncrna chromosome:ASM1462v1:Chromosome:4860143:4860213:1 gene:PA14_54840 gene_biotype:tRNA transcript_biotype:tRNA description:tRNA-Gly_CCC
GCGGGCGTCGTATAATGGCATTACCTGAGCTTCCCAAGCTCATGACGAGGGTTCGATTCCCTTCGCCCGCTCCA
>EBT00051367683 ncrna chromosome:ASM1462v1:Chromosome:5232640:5232712:-1 gene:PA14_58710 gene_biotype:tRNA transcript_biotype:tRNA description:tRNA-Thr_CGT
GCCGGATTAGCTCAGTCGGTAGAGCAGCTCATTCGTAATGAGAAGGTCGGGGGTTCGATTCCTCTATCCGGCACCA
>EBT00051368081 ncrna chromosome:ASM1462v1:Chromosome:5359482:5359555:-1 gene:PA14_60160 gene_biotype:tRNA transcript_biotype:tRNA description:tRNA-Pro_TGG
CGGGGTATAGCGCAGTCCGGTAGCGCGCCTGCTTTGGGAGCAGGATGTCGGGAGTTCGAATCTCTCTACCCCGACCA
>EBT00051367446 ncrna chromosome:ASM1462v1:Chromosome:5403550:5403623:1 gene:PA14_60620 gene_biotype:tRNA transcript_biotype:tRNA description:tRNA-Arg
GGTTCGATAGCTCAGCCTGGTAGAGCAACCATCCACGAAATGGTCTGTCGCGGGTTCGACTCCCGCTCGAACGTCCA
>EBT00051370188 ncrna chromosome:ASM1462v1:Chromosome:5510221:5510292:1 gene:PA14_61760 gene_biotype:tRNA transcript_biotype:tRNA description:tRNA-Gln_TTG
AGGGGCGTCGCCAAGCGGTAAGGCAGCAGGTTTTGATCCTGCCATGCGTTGGTTCGAATCCAGCCGCCCCTGCCA
>EBT00051369313 ncrna chromosome:ASM1462v1:Chromosome:5513969:5514042:1 gene:PA14_61830 gene_biotype:tRNA transcript_biotype:tRNA description:tRNA-Met_CAT
GGCTACATAGCTCAGTCGGTTAGAGCGCAGCATTCATAATGCTGATGTCCCAGGTTCAAGTCCCGGTGTAGCCACCA
>EBT00051369436 ncrna chromosome:ASM1462v1:Chromosome:5604020:5604093:-1 gene:PA14_62790 gene_biotype:tRNA transcript_biotype:tRNA description:tRNA-Met_CAT
CGCGGGGTGGAGCAGTCTGGTAGCTCGTCGGGCTCATAACCCGAAGGTCGTTGGTTCAAATCCAGCCCCCGCAACCA
>EBT00051370040 ncrna chromosome:ASM1462v1:Chromosome:5604187:5604269:-1 gene:PA14_62800 gene_biotype:tRNA transcript_biotype:tRNA description:tRNA-Leu_GAG
GCCGAGGTGGTGGAATTGGTAGACACGCTACCTTGAGGTGGTAGTGGCCATAGGCTGTAGGGGTTCGAGTCCCCTCCTCGGTACCA
>EBT00051370146 ncrna chromosome:ASM1462v1:Chromosome:5658407:5658498:-1 gene:PA14_63460 gene_biotype:tRNA transcript_biotype:tRNA description:tRNA-Sec
GGAAGGCAATCACGCCCGGTGGCGTGGCCGGACTTCAAATCCGGTGGGGGACGGCAGCCGTTCCTGGGTGGGTTCGACTCCCACTGCCTTCCCCA
>EBT00051367983 ncrna chromosome:ASM1462v1:Chromosome:5813004:5813087:1 gene:PA14_65210 gene_biotype:tRNA transcript_biotype:tRNA description:tRNA-Leu_CAG
GCCCAGGTGGCGGAATTGGTAGACGCACTAGGTTCAGGTCCTAGCGGTGGCAACACCGTGGAAGTTCGAGTCTTCTCCTGGGCACCA
>EBT00051367160 ncrna chromosome:ASM1462v1:Chromosome:6070731:6070803:1 gene:PA14_68030 gene_biotype:tRNA transcript_biotype:tRNA description:tRNA-Phe_GAA
GCCCAGGTAGCTCAGTTGGTAGAGCAGGGGATTGAAAATCCCCGTGTCGGCGGTTCGATTCCGTCCCTGGGCACCA
>EBT00051366161 ncrna chromosome:ASM1462v1:Chromosome:6082141:6082213:1 gene:PA14_68150 gene_biotype:tRNA transcript_biotype:tRNA description:tRNA-Thr_TGT
GCCGGTATAGCTCAGCTGGTAGAGCAACTGACTTGTAATCAGTAGGTCCCGGGTTCGACTCCTGGTGCCGGCACCA

## Sheet: 6B
Transcript ID	PA gene	tRNA
EBT00051364934	PA14_51230	Ser1(CGA)
EBT00051365018	PA14_30420	Ser1(UGA)
EBT00051365099	PA14_07470	Met3(CAU)
EBT00051365187	PA14_51660	Lys1(UUU)
EBT00051365344	PA14_03410	Arg1(CCG)
EBT00051365422	PA14_30720	Cys1(GCA)
EBT00051365503	PA14_28190	Val1(GAC)
EBT00051365670	PA14_41340	Arg1(UCU)
EBT00051365808	PA14_41200	Asp1(GUC)
EBT00051365908	PA14_21810	Asp2(GUC)
EBT00051366161	PA14_68150	Thr1(UGU)
EBT00051366328	PA14_08690	Trp1(CCA)
EBT00051366399	PA14_21800	Val1(UAC)
EBT00051366465	PA14_23570	Ala1(GGC)
EBT00051366536	PA14_52560	Ser1(GCU)
EBT00051366603	PA14_20500	Arg1(CCU)
EBT00051366843	PA14_52540	Arg1(ACG)
EBT00051366923	PA14_23580	Glu1(UUC)
EBT00051367160	PA14_68030	Phe1(GAA)
EBT00051367353	PA14_30680	Gly1(GCC)
EBT00051367446	PA14_60620	Arg2(ACG)
EBT00051367609	PA14_08660	Gly1(UCC)
EBT00051367683	PA14_58710	Thr1(CGU)
EBT00051367914	PA14_14570	Leu1(CAA)
EBT00051367983	PA14_65210	Leu1(CAG)
EBT00051368081	PA14_60160	Pro1(UGG)
EBT00051368205	PA14_41320	Leu1(UAG)
EBT00051368279	PA14_54840	Gly1(CCC)
EBT00051368550	PA14_24870	Pro1(CGG)
EBT00051368683	PA14_27190	Ser1(GGA)
EBT00051369258	PA14_41330	His1(GUG)
EBT00051369313	PA14_61830	Met1(CAU)
EBT00051369436	PA14_62790	fMet1(CAU)
EBT00051369492	PA14_23490	Asn1(GUU)
EBT00051369609	PA14_08670	Thr1(GGU)
EBT00051369657	PA14_52320	fMet2(CAU)
EBT00051369841	PA14_28740	Pro1(GGG)
EBT00051369932	PA14_08590	Ala1(UGC)
EBT00051369986	PA14_08650	Tyr1(GUA)
EBT00051370040	PA14_62800	Leu1(GAG)
EBT00051370091	PA14_08580	Ile1(GAU)
EBT00051370146	PA14_63460	Sec1(UCA)
EBT00051370188	PA14_61760	Gln1(UUG)

## Sheet: 6C
E. coli ID	E. coli tRNA	P. aeruginosa ID	P. aeruginosa tRNA	codon	Sequence Similarity
EBT00001514602	ArgQ	EBT00051366843	Arg1(ACG)	ACG	Similarity: 70/77 (90.9%)
EBT00001514709	LeuX	EBT00051367914	Leu1(CAA)	CAA	Similarity: 61/95 (64.2%)
EBT00001514730	LeuP	EBT00051367983	Leu1(CAG)	CAG	Similarity: 63/95 (66.3%)
EBT00001514597	MetT	EBT00051369313	Met1(CAU)	CAU	Similarity: 64/77 (83.1%)
EBT00001514651	MetV	EBT00051369436	fMet1(CAU)	CAU	Similarity: 74/77 (96.1%)
EBT00001514737	MetY	EBT00051369657	fMet2(CAU)	CAU	Similarity: 71/77 (92.2%)
EBT00001514641	TrpT	EBT00051366328	Trp1(CCA)	CCA	Similarity: 60/76 (78.9%)
EBT00001514729	GlyU	EBT00051368279	Gly1(CCC)	CCC	Similarity: 65/75 (86.7%)
EBT00001514671	ArgX	EBT00051365344	Arg1(CCG)	CCG	Similarity: 64/77 (83.1%)
EBT00001514747	ArgW	EBT00051366603	Arg1(CCU)	CCU	Similarity: 56/82 (68.3%)
EBT00001514584	SerU	EBT00051364934	Ser1(CGA)	CGA	Similarity: 73/97 (75.3%)
EBT00001514637	ProK	EBT00051368550	Pro1(CGG)	CGG	Similarity: 59/77 (76.6%)
EBT00001514734	ThrW	EBT00051367683	Thr1(CGU)	CGU	Similarity: 67/78 (85.9%)
EBT00001514723	PheU	EBT00051367160	Phe1(GAA)	GAA	Similarity: 68/78 (87.2%)
EBT00001514621	ValV	EBT00051365503	Val1(GAC)	GAC	Similarity: 67/79 (84.8%)
EBT00001514711	LeuU	EBT00051370040	Leu1(GAG)	GAG	Similarity: 81/88 (92.0%)
EBT00001514691	IleT	EBT00051370091	Ile1(GAU)	GAU	Similarity: 65/78 (83.3%)
EBT00001514638	CysT	EBT00051365422	Cys1(GCA)	GCA	Similarity: 59/76 (77.6%)
EBT00001514735	GlyV	EBT00051367353	Gly1(GCC)	GCC	Similarity: 76/76 (100.0%)
EBT00001514690	SerV	EBT00051366536	Ser1(GCU)	GCU	Similarity: 79/93 (84.9%)
EBT00001514678	SerW	EBT00051368683	Ser1(GGA)	GGA	Similarity: 84/90 (93.3%)
EBT00001514749	AlaW	EBT00051366465	Ala1(GGC)	GGC	Similarity: 72/76 (94.7%)
EBT00001514632	ProL	EBT00051369841	Pro1(GGG)	GGG	Similarity: 63/78 (80.8%)
EBT00001514707	ThrT	EBT00051369609	Thr1(GGU)	GGU	Similarity: 65/76 (85.5%)
EBT00001514598	TyrU	EBT00051369986	Tyr1(GUA)	GUA	Similarity: 77/85 (90.6%)
EBT00001514721	AspT	EBT00051365808	Asp1(GUC)	GUC	Similarity: 74/77 (96.1%)
EBT00001514699	HisR	EBT00051369258	His1(GUG)	GUG	Similarity: 63/77 (81.8%)
EBT00001514738	AsnT	EBT00051369492	Asn1(GUU)	GUU	Similarity: 58/76 (76.3%)
EBT00001514719	ValT	EBT00051366399	Val1(UAC)	UAC	Similarity: 72/76 (94.7%)
EBT00001514636	LeuW	EBT00051368205	Leu1(UAG)	UAG	Similarity: 70/85 (82.4%)
EBT00001514622	GlyT	EBT00051367609	Gly1(UCC)	UCC	Similarity: 65/75 (86.7%)
EBT00001514635	ArgU	EBT00051365670	Arg1(UCU)	UCU	Similarity: 64/77 (83.1%)
EBT00001514689	SerT	EBT00051365018	Ser1(UGA)	UGA	Similarity: 73/95 (76.8%)
EBT00001514652	AlaT	EBT00051369932	Ala1(UGC)	UGC	Similarity: 68/76 (89.5%)
EBT00001514733	ProM	EBT00051368081	Pro1(UGG)	UGG	Similarity: 60/78 (76.9%)
EBT00001514627	ThrU	EBT00051366161	Thr1(UGU)	UGU	Similarity: 63/76 (82.9%)
EBT00001514732	GltT	EBT00051366923	Glu1(UUC)	UUC	Similarity: 73/76 (96.1%)
EBT00001514676	GlnU	EBT00051370188	Gln1(UUG)	UUG	Similarity: 59/75 (78.7%)
EBT00001514624	LysQ	EBT00051365187	Lys1(UUU)	UUU	Similarity: 71/76 (93.4%)
EBT00001514743	Sec	EBT00051370146	Sec1(UCA)	UCA	Similarity: 68/96 (70.8%)
