# Supplementary material
Source: HighWire-hosted journal article supplement (doi:10.1101/rna.080004.124)
Supplement: SuppTable7.xlsx [file SuppTable7.xlsx]

## Sheet: Sheet1
Transcript ID_Ec	tRNA	Annot. Pos.	Region	AC	ref base	Annot. Mods	CDM Misincorporation Freq.	CDM Avg. Depth	CDM Term. Score		Transcript ID_PA	tRNA	ref base	Annot. Pos.	Region	AC	PA Misincorporation Freq.	PA Avg. Depth	PA Term. Score
EBT00001514602	ArgQ	1	Acc-stem	ACG	G	G	0	1645.67	0.0372465		EBT00051366843	Arg1	G	1	Acc-stem	ACG	0	232	0.0333333
EBT00001514602	ArgQ	2	Acc-stem	ACG	C	C	0	1709.33	0.0237959		EBT00051366843	Arg1	C	2	Acc-stem	ACG	0	240	0.00138696
EBT00001514602	ArgQ	3	Acc-stem	ACG	A	A	0.00128038	1751	0.000190331		EBT00051366843	Arg1	A	3	Acc-stem	ACG	0.00273224	240.333	0
EBT00001514602	ArgQ	4	Acc-stem	ACG	T	U	0.00104351	1751.33	0		EBT00051366843	Arg1	C	4	Acc-stem	ACG	0	240.333	0.00138504
EBT00001514602	ArgQ	5	Acc-stem	ACG	C	C	0.000913381	1751.33	0.000190295		EBT00051366843	Arg1	T	5	Acc-stem	ACG	0.00189394	240.667	0
EBT00001514602	ArgQ	6	Acc-stem	ACG	C	C	0.00131191	1751.67	0.00548827		EBT00051366843	Arg1	C	6	Acc-stem	ACG	0	240.667	0.0373333
EBT00001514602	ArgQ	7	Acc-stem	ACG	G	G	0.00121159	1761.33	0.00358288		EBT00051366843	Arg1	A	7	Acc-stem	ACG	0	250	0.0131579
EBT00001514602	ArgQ	8	0	ACG	T	s4U	0.0439325	1767.67	0.000377002		EBT00051366843	Arg1	T	8	0	ACG	0.0833718	253.333	0.0617284
EBT00001514602	ArgQ	9	0	ACG	A	A	0.000788772	1768.33	0.00431682		EBT00051366843	Arg1	A	9	0	ACG	0	270	0
EBT00001514602	ArgQ	10	D-stem	ACG	G	G	0.000697496	1776	0.0100334		EBT00051366843	Arg1	G	10	D-stem	ACG	0	270	0.0322581
EBT00001514602	ArgQ	11	D-stem	ACG	C	C	0.000872209	1794	0.0214545		EBT00051366843	Arg1	C	11	D-stem	ACG	0.00557136	279	0.0323699
EBT00001514602	ArgQ	12	D-stem	ACG	T	U	0.00131504	1833.33	0.000181785		EBT00051366843	Arg1	T	12	D-stem	ACG	0.00290483	288.333	0
EBT00001514602	ArgQ	13	D-stem	ACG	C	C	0.00291502	1833.67	0		EBT00051366843	Arg1	C	13	D-stem	ACG	0.00131752	288.333	0.00115473
EBT00001514602	ArgQ	14	D-loop	ACG	A	A	0.000710001	1833.67	0.00542397		EBT00051366843	Arg1	A	14	D-loop	ACG	0	288.667	0.0102857
EBT00001514602	ArgQ	15	D-loop	ACG	G	G	0.0010924	1843.67	0.0094914		EBT00051366843	Arg1	G	15	D-loop	ACG	0.00173611	291.667	0.0913811
EBT00001514602	ArgQ	16	D-loop	ACG	C	C	0.000231803	1861.33	0.00250089		EBT00051366843	Arg1	C	16	D-loop	ACG	0.000744048	321	0.127717
EBT00001514602	ArgQ	17	D-loop	ACG	T	D	0.00317963	1866	0		EBT00051366843	Arg1	T	17	D-loop	ACG	0.00119048	368	0
EBT00001514602	ArgQ	18	D-loop	ACG	G	G	0.00168825	1865.67	0.000178635		EBT00051366843	Arg1	G	18	D-loop	ACG	0	368	0.00808625
EBT00001514602	ArgQ	19	D-loop	ACG	G	G	0.00134852	1866	0.0553493		EBT00051366843	Arg1	G	19	D-loop	ACG	0	371	0.526383
EBT00001514602	ArgQ	20	D-loop	ACG	A	A	0.00149916	1975.33	0.0633792		EBT00051366843	Arg1	A	20	D-loop	ACG	0	783.333	0.201766
EBT00001514602	ArgQ	20a	D-loop	ACG	T	D	0.00436723	2109	0.00346511		EBT00051366843	Arg1	T	20a	D-loop	ACG	0.000361533	981.333	0.0186667
EBT00001514602	ArgQ	21	D-stem	ACG	A	A	0.000705798	2116.33	0.000314911		EBT00051366843	Arg1	A	21	D-loop	ACG	0.000175623	1000	0.0234375
EBT00001514602	ArgQ	22	D-stem	ACG	G	G	0.00354873	2117	0.000157431		EBT00051366843	Arg1	G	22	D-stem	ACG	0.00171676	1024	0.0119009
EBT00001514602	ArgQ	23	D-stem	ACG	A	A	0.000705189	2117.33	0.00204242		EBT00051366843	Arg1	A	23	D-stem	ACG	0.000339616	1036.33	0.0204789
EBT00001514602	ArgQ	24	D-stem	ACG	G	G	0.00683419	2121.67	0.0377929		EBT00051366843	Arg1	G	24	D-stem	ACG	0.00166208	1058	0.049416
EBT00001514602	ArgQ	25	0	ACG	T	U	0.00280334	2205	0.00705494		EBT00051366843	Arg1	T	25	D-stem	ACG	0.00268674	1113	0.000299401
EBT00001514602	ArgQ	26	Ac-Stem	ACG	A	A	0.000743631	2220.67	0.00833581		EBT00051366843	Arg1	A	26	0	ACG	0.00124253	1113.33	0.0216755
EBT00001514602	ArgQ	27	Ac-Stem	ACG	C	C	0.000545822	2239.33	0.0209851		EBT00051366843	Arg1	C	27	Ac-stem	ACG	0.00104788	1138	0.0130095
EBT00001514602	ArgQ	28	Ac-Stem	ACG	T	U	0.00239254	2287.33	0		EBT00051366843	Arg1	T	28	Ac-stem	ACG	0.0032735	1153	0.000289017
EBT00001514602	ArgQ	29	Ac-Stem	ACG	C	C	0.0174033	2287.33	0		EBT00051366843	Arg1	C	29	Ac-stem	ACG	0.00297697	1153.33	0.00230681
EBT00001514602	ArgQ	30	Ac-Stem	ACG	G	G	0.0154191	2287	0.00014573		EBT00051366843	Arg1	G	30	Ac-stem	ACG	0.00384022	1156	0
EBT00001514602	ArgQ	31	Ac-loop	ACG	G	G	0.018069	2287.33	0		EBT00051366843	Arg1	G	31	Ac-stem	ACG	0.00257996	1156	0
EBT00001514602	ArgQ	32	Ac-loop	ACG	C	s2C	0.00374109	2283.67	0		EBT00051366843	Arg1	C	32	Ac-loop	ACG	0.00544922	1154	0.00288018
EBT00001514602	ArgQ	33	Ac-loop	ACG	T	U	0.00335719	2279.33	0.00364272		EBT00051366843	Arg1	T	33	Ac-loop	ACG	0.00555378	1157.33	0
EBT00001514602	ArgQ	34	Ac-loop	ACG	A	I	0.990297	2287.67	0.0851773		EBT00051366843	Arg1	A	34	Ac-loop	ACG	0.994244	1152	0.114981
EBT00001514602	ArgQ	35	Ac-loop	ACG	C	C	0.00767616	2500.67	0.0377116		EBT00051366843	Arg1	C	35	Ac-loop	ACG	0.00187499	1301.67	0.0261845
EBT00001514602	ArgQ	36	Ac-loop	ACG	G	G	0.00861817	2598.67	0.523792		EBT00051366843	Arg1	G	36	Ac-loop	ACG	0.00181949	1336.67	0.24053
EBT00001514602	ArgQ	37	Ac-loop	ACG	A	m2A	0.00286426	5457	0.542812		EBT00051366843	Arg1	A	37	Ac-loop	ACG	0.00802995	1760	0.33173
EBT00001514602	ArgQ	38	Ac-stem	ACG	A	A	0.00236172	11936	0.505175		EBT00051366843	Arg1	A	38	Ac-loop	ACG	0.00172805	2633.67	0.327345
EBT00001514602	ArgQ	39	Ac-stem	ACG	C	C	0.00396146	24121.7	0.190077		EBT00051366843	Arg1	C	39	Ac-stem	ACG	0.00261712	3915.33	0.118367
EBT00001514602	ArgQ	40	Ac-stem	ACG	C	C	0.00265627	29782.7	0.00619543		EBT00051366843	Arg1	C	40	Ac-stem	ACG	0.00250273	4441	0.00291872
EBT00001514602	ArgQ	41	Ac-stem	ACG	G	G	0.0030086	29968.3	0.00593751		EBT00051366843	Arg1	G	41	Ac-stem	ACG	0.000679999	4454	0.00127065
EBT00001514602	ArgQ	42	Ac-stem	ACG	A	A	0.00282595	30147.3	0.000629841		EBT00051366843	Arg1	A	42	Ac-stem	ACG	0.00240199	4459.67	0.00119448
EBT00001514602	ArgQ	43	V-region	ACG	G	G	0.00250527	30166.3	0.00272188		EBT00051366843	Arg1	G	43	Ac-stem	ACG	0.00193501	4465	0.00245755
EBT00001514602	ArgQ	44	V-region	ACG	C	C	0.00314399	30248.7	0		EBT00051366843	Arg1	C	44	V-region	ACG	0.00191801	4476	0
EBT00001514602	ArgQ	45	V-region	ACG	G	G	0.00187721	28602	0.0327032		EBT00051366843	Arg1	G	45	V-region	ACG	0.00134991	3967	0.0382253
EBT00001514602	ArgQ	46	V-region	ACG	G	m7G	0.00251792	29569	0.417895		EBT00051366843	Arg1	G	46	V-region	ACG	0.00296562	4124.67	0.486492
EBT00001514602	ArgQ	47	V-region	ACG	T	acp3U	0.18528	50796.7	0.305721		EBT00051366843	Arg1	T	47	V-region	ACG	0.196217	8032.33	0.300502
EBT00001514602	ArgQ	48	T-stem	ACG	C	C	0.00128254	73164.7	0.00452624		EBT00051366843	Arg1	C	48	V-region	ACG	0.000908035	11483	0.00806243
EBT00001514602	ArgQ	49	T-stem	ACG	G	G	0.00143513	73497.3	0.00207738		EBT00051366843	Arg1	G	49	T-stem	ACG	0.0011461	11576.3	0.00350062
EBT00001514602	ArgQ	50	T-stem	ACG	G	G	0.00158034	73650.3	0.00118438		EBT00051366843	Arg1	G	50	T-stem	ACG	0.000950017	11617	0.00106054
EBT00001514602	ArgQ	51	T-stem	ACG	A	A	0.00114706	73737.7	0.000140117		EBT00051366843	Arg1	A	51	T-stem	ACG	0.00108239	11629.3	0.000429762
EBT00001514602	ArgQ	52	T-stem	ACG	G	G	0.000923232	73748	0.000347911		EBT00051366843	Arg1	G	52	T-stem	ACG	0.000939795	11634.3	0.000858787
EBT00001514602	ArgQ	53	T-loop	ACG	G	G	0.000955543	73773.7	0.00562959		EBT00051366843	Arg1	G	53	T-stem	ACG	0.000766198	11644.3	0.0145005
EBT00001514602	ArgQ	54	T-loop	ACG	T	T	0.00147574	74191.3	7.63733e-05		EBT00051366843	Arg1	T	54	T-loop	ACG	0.00150433	11815.7	0.000197439
EBT00001514602	ArgQ	55	T-loop	ACG	T	Y	0.000667128	74197	0		EBT00051366843	Arg1	T	55	T-loop	ACG	0.000368693	11818	0
EBT00001514602	ArgQ	56	T-loop	ACG	C	C	0.000487668	74196.7	4.4925e-06		EBT00051366843	Arg1	C	56	T-loop	ACG	0.000411907	11818	0
EBT00001514602	ArgQ	57	T-loop	ACG	G	G	7.15e-05	74197	0		EBT00051366843	Arg1	G	57	T-loop	ACG	0.00010533	11818	0
EBT00001514602	ArgQ	58	T-loop	ACG	A	A	5.55e-05	74197	0		EBT00051366843	Arg1	A	58	T-loop	ACG	8.14e-05	11817.7	2.82053e-05
EBT00001514602	ArgQ	59	T-loop	ACG	A	A	0.000199276	74197	0		EBT00051366843	Arg1	A	59	T-loop	ACG	0.000407338	11818	0
EBT00001514602	ArgQ	60	T-stem	ACG	T	U	0.000747952	74197	0		EBT00051366843	Arg1	T	60	T-loop	ACG	0.000617825	11818	0
EBT00001514602	ArgQ	61	T-stem	ACG	C	C	0.000663375	74196	1.34776e-05		EBT00051366843	Arg1	C	61	T-stem	ACG	0.000938607	11818	0
EBT00001514602	ArgQ	62	T-stem	ACG	C	C	0.000766178	74197	0		EBT00051366843	Arg1	C	62	T-stem	ACG	0.00078594	11818	0
EBT00001514602	ArgQ	63	T-stem	ACG	T	U	0.00115799	74197	0		EBT00051366843	Arg1	T	63	T-stem	ACG	0.000886203	11818	0
EBT00001514602	ArgQ	64	T-stem	ACG	C	C	0.00147423	74194	3.1448e-05		EBT00051366843	Arg1	C	64	T-stem	ACG	0.000560477	11818	0
EBT00001514602	ArgQ	65	Acc-stem	ACG	C	C	0.00136661	74196.3	0		EBT00051366843	Arg1	C	65	T-stem	ACG	0.000675345	11818	0
EBT00001514602	ArgQ	66	Acc-stem	ACG	C	C	0.00103593	74196.3	0		EBT00051366843	Arg1	T	66	Acc-stem	ACG	0.00419231	11817.7	2.82053e-05
EBT00001514602	ArgQ	67	Acc-stem	ACG	G	G	0.00112462	74194.3	2.24631e-05		EBT00051366843	Arg1	G	67	Acc-stem	ACG	0.000503032	11818	0
EBT00001514602	ArgQ	68	Acc-stem	ACG	G	G	0.00175839	74196	0		EBT00051366843	Arg1	A	68	Acc-stem	ACG	0.00355043	11818	0
EBT00001514602	ArgQ	69	Acc-stem	ACG	A	A	0.00112717	74196	0		EBT00051366843	Arg1	G	69	Acc-stem	ACG	0.00404425	11818	0
EBT00001514602	ArgQ	70	Acc-stem	ACG	T	U	0.00443651	74196	0		EBT00051366843	Arg1	T	70	Acc-stem	ACG	0.00609373	11818	0
EBT00001514602	ArgQ	71	Acc-stem	ACG	G	G	0.00208695	74193.3	4.49284e-06		EBT00051366843	Arg1	G	71	Acc-stem	ACG	0.00186838	11817.7	2.82053e-05
EBT00001514602	ArgQ	72	0	ACG	C	C	0.00292236	74193.7	0		EBT00051366843	Arg1	C	72	Acc-stem	ACG	0.00536739	11818	0
EBT00001514602	ArgQ	73	0	ACG	A	A	0.00347998	74190.3	3.14497e-05		EBT00051366843	Arg1	G	73	0	ACG	0.00507921	11816.7	8.46191e-05
EBT00001514602	ArgQ	74	0	ACG	C	C	0.000923507	74192.7	0		EBT00051366843	Arg1	C	74	0	ACG	0.00173458	11817.7	0
EBT00001514602	ArgQ	75	0	ACG	C	C	0	70325.3	0		EBT00051366843	Arg1	C	75	0	ACG	0	10615	0
EBT00001514602	ArgQ	76	0	ACG	A	A	0	61451.3	0		EBT00051366843	Arg1	A	76	0	ACG	0	8510.33	0
EBT00001514709	LeuX	1	Acc-stem	CAA	G	G	NA	99.6667	NA		EBT00051367914	Leu1	G	1	Acc-stem	CAA	NA	0	NA
EBT00001514709	LeuX	2	Acc-stem	CAA	C	C	NA	99.6667	NA		EBT00051367914	Leu1	C	2	Acc-stem	CAA	NA	0	NA
EBT00001514709	LeuX	3	Acc-stem	CAA	C	C	NA	99.6667	NA		EBT00051367914	Leu1	C	3	Acc-stem	CAA	NA	0	NA
EBT00001514709	LeuX	4	Acc-stem	CAA	G	G	NA	99.6667	NA		EBT00051367914	Leu1	T	4	Acc-stem	CAA	NA	0	NA
EBT00001514709	LeuX	5	Acc-stem	CAA	A	A	NA	99.6667	NA		EBT00051367914	Leu1	C	5	Acc-stem	CAA	NA	0	NA
EBT00001514709	LeuX	6	Acc-stem	CAA	A	A	NA	99.6667	NA		EBT00051367914	Leu1	G	6	Acc-stem	CAA	NA	0	NA
EBT00001514709	LeuX	7	Acc-stem	CAA	G	G	NA	99.6667	NA		EBT00051367914	Leu1	G	7	Acc-stem	CAA	NA	0	NA
EBT00001514709	LeuX	8	0	CAA	T	s4U	0.186299	102.667	0		EBT00051367914	Leu1	T	8	0	CAA	NA	0	NA
EBT00001514709	LeuX	9	0	CAA	G	G	0.00199601	102.667	0.109827		EBT00051367914	Leu1	G	9	0	CAA	NA	0	NA
EBT00001514709	LeuX	10	D-stem	CAA	G	G	0	115.333	0		EBT00051367914	Leu1	G	10	D-stem	CAA	NA	0	NA
EBT00001514709	LeuX	11	D-stem	CAA	C	C	0.004041	115.333	0		EBT00051367914	Leu1	C	11	D-stem	CAA	NA	0	NA
EBT00001514709	LeuX	12	D-stem	CAA	G	G	0.00199601	115.333	0		EBT00051367914	Leu1	G	12	D-stem	CAA	NA	0	NA
EBT00001514709	LeuX	13	D-stem	CAA	A	A	0	115.333	0		EBT00051367914	Leu1	G	13	D-stem	CAA	NA	0	NA
EBT00001514709	LeuX	14	D-loop	CAA	A	A	0	115.333	0		EBT00051367914	Leu1	A	14	D-loop	CAA	NA	0	NA
EBT00001514709	LeuX	15	D-loop	CAA	A	A	0	115.333	0.229399		EBT00051367914	Leu1	A	15	D-loop	CAA	NA	0	NA
EBT00001514709	LeuX	16	D-loop	CAA	T	D	0	149.667	0		EBT00051367914	Leu1	T	16	D-loop	CAA	NA	10.3333	NA
EBT00001514709	LeuX	17	D-loop	CAA	C	C	0.00204499	149.667	0		EBT00051367914	Leu1	C	17	D-loop	CAA	NA	10.3333	NA
EBT00001514709	LeuX	18	D-loop	CAA	G	Gm	0	149.667	0		EBT00051367914	Leu1	G	18	D-loop	CAA	NA	10.3333	NA
EBT00001514709	LeuX	19	D-loop	CAA	G	G	0	149.667	0		EBT00051367914	Leu1	G	19	D-loop	CAA	NA	10.3333	NA
EBT00001514709	LeuX	20	D-loop	CAA	T	D	0.00327956	149.667	0		EBT00051367914	Leu1	T	20	D-loop	CAA	NA	10.3333	NA
EBT00001514709	LeuX	20a	D-loop	CAA	A	A	0	149.667	0		EBT00051367914	Leu1	A	20a	D-loop	CAA	NA	10.3333	NA
EBT00001514709	LeuX	21	D-loop	CAA	G	G	0	149.667	0.00663717		EBT00051367914	Leu1	G	21	D-loop	CAA	NA	10.3333	NA
EBT00001514709	LeuX	22	D-stem	CAA	A	A	0.002442	150.667	0		EBT00051367914	Leu1	A	22	D-stem	CAA	NA	10.3333	NA
EBT00001514709	LeuX	23	D-stem	CAA	C	C	0.0228783	150.667	0		EBT00051367914	Leu1	C	23	D-stem	CAA	NA	10.3333	NA
EBT00001514709	LeuX	24	D-stem	CAA	G	G	0	150.667	0		EBT00051367914	Leu1	G	24	D-stem	CAA	NA	10.3333	NA
EBT00001514709	LeuX	25	D-stem	CAA	C	C	0	150.667	0		EBT00051367914	Leu1	C	25	D-stem	CAA	NA	10.3333	NA
EBT00001514709	LeuX	26	0	CAA	A	A	0.00204499	150.667	0		EBT00051367914	Leu1	G	26	0	CAA	NA	10.3333	NA
EBT00001514709	LeuX	27	Ac-Stem	CAA	G	G	0.00204499	150.667	0		EBT00051367914	Leu1	G	27	Ac-stem	CAA	NA	10.3333	NA
EBT00001514709	LeuX	28	Ac-Stem	CAA	T	U	0.001221	150.667	0		EBT00051367914	Leu1	C	28	Ac-stem	CAA	NA	10.3333	NA
EBT00001514709	LeuX	29	Ac-Stem	CAA	T	U	0.00326599	150.667	0		EBT00051367914	Leu1	G	29	Ac-stem	CAA	NA	10.3333	NA
EBT00001514709	LeuX	30	Ac-Stem	CAA	G	G	0	150.667	0		EBT00051367914	Leu1	G	30	Ac-stem	CAA	NA	10.3333	NA
EBT00001514709	LeuX	31	Ac-Stem	CAA	A	A	0	150.667	0.15197		EBT00051367914	Leu1	A	31	Ac-stem	CAA	NA	10.3333	NA
EBT00001514709	LeuX	32	Ac-loop	CAA	T	Y	0	177.667	0		EBT00051367914	Leu1	T	32	Ac-loop	CAA	NA	10.3333	NA
EBT00001514709	LeuX	33	Ac-loop	CAA	T	U	0	177.667	0.603127		EBT00051367914	Leu1	T	33	Ac-loop	CAA	NA	10.3333	NA
EBT00001514709	LeuX	34	Ac-loop	CAA	C	Cm	0.000616143	447.667	0.330175		EBT00051367914	Leu1	C	34	Ac-loop	CAA	NA	15.6667	NA
EBT00001514709	LeuX	35	Ac-loop	CAA	A	A	0	668.333	0.31076		EBT00051367914	Leu1	A	35	Ac-loop	CAA	NA	47	NA
EBT00001514709	LeuX	36	Ac-loop	CAA	A	A	0.00110254	969.667	0.319373		EBT00051367914	Leu1	A	36	Ac-loop	CAA	NA	84.6667	NA
EBT00001514709	LeuX	37	Ac-loop	CAA	A	ms2i6A	0.17703	1424.67	0.798994		EBT00051367914	Leu1	A	37	Ac-loop	CAA	0.0497493	120.667	0.767502
EBT00001514709	LeuX	38	Ac-loop	CAA	A	A	0.0140211	7087.67	0.217726		EBT00051367914	Leu1	A	38	Ac-loop	CAA	0.0144145	519	0.126263
EBT00001514709	LeuX	39	Ac-stem	CAA	T	Y	0.000133868	9060.33	0.00712303		EBT00051367914	Leu1	T	39	Ac-stem	CAA	0.00405269	594	0.0039128
EBT00001514709	LeuX	40	Ac-stem	CAA	C	C	0.00147764	9125.33	0.00356701		EBT00051367914	Leu1	C	40	Ac-stem	CAA	0.00167371	596.333	0.0458667
EBT00001514709	LeuX	41	Ac-stem	CAA	A	A	0.00173446	9158	0.000945455		EBT00051367914	Leu1	C	41	Ac-stem	CAA	0.00455498	625	0.000533049
EBT00001514709	LeuX	42	Ac-stem	CAA	A	A	0.0026081	9166.67	3.63623e-05		EBT00051367914	Leu1	G	42	Ac-stem	CAA	0.00191482	625.333	0.0121116
EBT00001514709	LeuX	43	Ac-stem	CAA	C	C	0.00271314	9167	0.00174235		EBT00051367914	Leu1	T	43	Ac-stem	CAA	0.00381346	633	0.0129938
EBT00001514709	LeuX	44	V-region	CAA	C	C	0.00347653	9183	0		EBT00051367914	Leu1	T	44	V-region	CAA	0.00257354	641.333	0.0092688
EBT00001514709	LeuX	V1	V-region	CAA	G	G	0.00137798	9183	0.00314807		EBT00051367914	Leu1	T	V1	V-region	CAA	0.00119749	647.333	0
EBT00001514709	LeuX	V2	V-region	CAA	T	U	0.00481424	9212	0		EBT00051367914	Leu1	C	V2	V-region	CAA	0.00301919	647.333	0.00715746
EBT00001514709	LeuX	V3	V-region	CAA	A	A	0.000608385	9211.67	0.000289404		EBT00051367914	Leu1	T	V3	V-region	CAA	0.00486139	652	0
EBT00001514709	LeuX	V8	V-region	CAA	G	G	0.00204301	9214.33	0.00550439		EBT00051367914	Leu1	G	V4	V-region	CAA	0.00491906	651.667	0.00811771
EBT00001514709	LeuX	V9	V-region	CAA	A	A	0.000604914	9265.33	0.00547426		EBT00051367914	Leu1	G	V8	V-region	CAA	0.0100007	657	0.0361858
EBT00001514709	LeuX	V10	V-region	CAA	A	A	0.000664635	9316.33	0.00791566		EBT00051367914	Leu1	C	V9	V-region	CAA	0.00447433	681.667	0
EBT00001514709	LeuX	V11	V-region	CAA	A	A	0.000477334	9390.67	0.0126174		EBT00051367914	Leu1	G	V10	V-region	CAA	0.00202236	681.667	0.0261905
EBT00001514709	LeuX	V17	V-region	CAA	T	U	0.00535475	9510.67	0.00470925		EBT00051367914	Leu1	A	V11	V-region	CAA	0.00255564	700	0.0393413
EBT00001514709	LeuX	V18	V-region	CAA	A	A	0.0005823	9555.67	0.000453278		EBT00051367914	Leu1	C	V16	V-region	CAA	0.00277258	728.667	0.0210479
EBT00001514709	LeuX	V19	V-region	CAA	C	C	0.00289757	9560	0.00128844		EBT00051367914	Leu1	A	V17	V-region	CAA	0.000561167	744.333	0.00534521
EBT00001514709	LeuX	46	V-region	CAA	G	G	0.00202548	9572.33	0.00114783		EBT00051367914	Leu1	G	V18	V-region	CAA	0.000555556	748.333	0.0162138
EBT00001514709	LeuX	48	V-region	CAA	T	U	0.00468422	9583.33	0.000764632		EBT00051367914	Leu1	A	V19	V-region	CAA	0.000548246	760.667	0.0134025
EBT00001514709	LeuX	49	T-stem	CAA	G	G	0.00204281	9590.67	0.000764048		EBT00051367914	Leu1	G	46	V-region	CAA	0.00125238	771	0.0153257
EBT00001514709	LeuX	50	T-stem	CAA	C	C	0.00258349	9598	0		EBT00051367914	Leu1	T	48	V-region	CAA	0.0048574	783	0
EBT00001514709	LeuX	51	T-stem	CAA	C	C	0.00347854	9598	0		EBT00051367914	Leu1	G	49	T-stem	CAA	0.000790145	783	0
EBT00001514709	LeuX	52	T-stem	CAA	G	G	0.00200394	9598	0		EBT00051367914	Leu1	A	50	T-stem	CAA	0.0017635	783	0
EBT00001514709	LeuX	53	T-stem	CAA	G	G	0.00261642	9598	0.000763465		EBT00051367914	Leu1	G	51	T-stem	CAA	0.00378174	783	0
EBT00001514709		NA	NA	NA	NA	NA	NA	NA	NA		EBT00051367914	Leu1	A	52	T-stem	CAA	0.000703235	783	0
EBT00001514709		NA	NA	NA	NA	NA	NA	NA	NA		EBT00051367914	Leu1	G	53	T-stem	CAA	0.00307367	783	0.0232848
EBT00001514709	LeuX	54	T-loop	CAA	T	T	0.00433263	9605.33	0.000277547		EBT00051367914	Leu1	T	54	T-loop	CAA	0.00816696	801.667	0
EBT00001514709	LeuX	55	T-loop	CAA	T	Y	0.00200847	9608	0		EBT00051367914	Leu1	T	55	T-loop	CAA	0.0047933	801.667	0
EBT00001514709	LeuX	56	T-loop	CAA	C	C	0.00219776	9602.33	0.000589786		EBT00051367914	Leu1	C	56	T-loop	CAA	0.00421756	801.667	0
EBT00001514709	LeuX	57	T-loop	CAA	G	G	0.00167635	9608	0		EBT00051367914	Leu1	G	57	T-loop	CAA	0.00177874	801.667	0
EBT00001514709	LeuX	58	T-loop	CAA	A	A	0.000693855	9608	0		EBT00051367914	Leu1	A	58	T-loop	CAA	0.000268168	801.667	0
EBT00001514709	LeuX	59	T-loop	CAA	G	G	0.0010257	9608	0		EBT00051367914	Leu1	G	59	T-loop	CAA	0.00170653	801.667	0
EBT00001514709	LeuX	60	T-loop	CAA	T	U	0.00302437	9607.33	3.46946e-05		EBT00051367914	Leu1	T	60	T-loop	CAA	0.0023807	801.667	0
EBT00001514709	LeuX	61	T-stem	CAA	C	C	0.0013724	9607.67	3.46933e-05		EBT00051367914	Leu1	C	61	T-stem	CAA	0	801.667	0
EBT00001514709	LeuX	62	T-stem	CAA	C	C	0.00543753	9608	0		EBT00051367914	Leu1	T	62	T-stem	CAA	0.0015762	801.667	0
EBT00001514709	LeuX	63	T-stem	CAA	G	G	0.00206518	9608	0		EBT00051367914	Leu1	C	63	T-stem	CAA	0.00147117	801.667	0
EBT00001514709	LeuX	64	T-stem	CAA	G	G	0.00246555	9608	0		EBT00051367914	Leu1	T	64	T-stem	CAA	0.00341306	801.667	0
EBT00001514709	LeuX	65	T-stem	CAA	C	C	0.00442239	9607.33	6.93867e-05		EBT00051367914	Leu1	C	65	T-stem	CAA	0.00143836	801.667	0
EBT00001514709	LeuX	66	Acc-stem	CAA	C	C	0.00231905	9608	0		EBT00051367914	Leu1	C	66	Acc-stem	CAA	0.0083948	801.667	0
EBT00001514709	LeuX	67	Acc-stem	CAA	T	U	0.0133379	9607.33	6.93867e-05		EBT00051367914	Leu1	C	67	Acc-stem	CAA	0.00757909	801.667	0
EBT00001514709	LeuX	68	Acc-stem	CAA	T	U	0.00550925	9608	0		EBT00051367914	Leu1	G	68	Acc-stem	CAA	0.000536769	801.333	0.0004158
EBT00001514709	LeuX	69	Acc-stem	CAA	C	C	0.00580539	9607.67	0		EBT00051367914	Leu1	A	69	Acc-stem	CAA	0.0015762	801.667	0
EBT00001514709	LeuX	70	Acc-stem	CAA	G	G	0.0114377	9606.33	0.000138778		EBT00051367914	Leu1	G	70	Acc-stem	CAA	0.00280451	801.667	0
EBT00001514709	LeuX	71	Acc-stem	CAA	G	G	0.00591534	9607.67	0		EBT00051367914	Leu1	G	71	Acc-stem	CAA	0.00726493	801.667	0
EBT00001514709	LeuX	72	Acc-stem	CAA	C	C	0.00291962	9607.67	0		EBT00051367914	Leu1	C	72	Acc-stem	CAA	0.0134712	801.667	0
EBT00001514709	LeuX	73	0	CAA	A	A	0.00686091	9607.33	0		EBT00051367914	Leu1	A	73	0	CAA	0.00581906	801.667	0
EBT00001514709	LeuX	74	0	CAA	C	C	0.00249086	9605.67	0.000138788		EBT00051367914	Leu1	C	74	0	CAA	0.000268168	801.667	0
EBT00001514709	LeuX	75	0	CAA	C	C	0	9607	0		EBT00051367914	Leu1	C	75	0	CAA	0	773	0
EBT00001514709	LeuX	76	0	CAA	A	A	0	8153.67	0		EBT00051367914	Leu1	A	76	0	CAA	0	673.667	0
EBT00001514730	LeuP	1	Acc-stem	CAG	G	G	NA	0.333333	NA		EBT00051367983	Leu1	G	1	Acc-stem	CAG	0	107.667	0.00308642
EBT00001514730	LeuP	2	Acc-stem	CAG	C	C	NA	0.333333	NA		EBT00051367983	Leu1	C	2	Acc-stem	CAG	0	108	0
EBT00001514730	LeuP	3	Acc-stem	CAG	G	G	NA	0.333333	NA		EBT00051367983	Leu1	C	3	Acc-stem	CAG	0	108	0.0328358
EBT00001514730	LeuP	4	Acc-stem	CAG	A	A	NA	0.333333	NA		EBT00051367983	Leu1	C	4	Acc-stem	CAG	0.0040404	111.667	0
EBT00001514730	LeuP	5	Acc-stem	CAG	A	A	NA	0.333333	NA		EBT00051367983	Leu1	A	5	Acc-stem	CAG	0	111.667	0
EBT00001514730	LeuP	6	Acc-stem	CAG	G	G	NA	0.333333	NA		EBT00051367983	Leu1	G	6	Acc-stem	CAG	0.00456621	111.667	0.0482955
EBT00001514730	LeuP	7	Acc-stem	CAG	G	G	NA	0.333333	NA		EBT00051367983	Leu1	G	7	Acc-stem	CAG	0	117.333	0
EBT00001514730	LeuP	8	0	CAG	T	U	NA	0.333333	NA		EBT00051367983	Leu1	T	8	0	CAG	0.00526793	117.333	0
EBT00001514730	LeuP	9	0	CAG	G	G	NA	0.333333	NA		EBT00051367983	Leu1	G	9	0	CAG	0.00456621	117.333	0
EBT00001514730	LeuP	10	D-stem	CAG	G	G	NA	0.333333	NA		EBT00051367983	Leu1	G	10	D-stem	CAG	0.00639771	117.333	0
EBT00001514730	LeuP	11	D-stem	CAG	C	C	NA	0.333333	NA		EBT00051367983	Leu1	C	11	D-stem	CAG	0	117.333	0
EBT00001514730	LeuP	12	D-stem	CAG	G	G	NA	0.333333	NA		EBT00051367983	Leu1	G	12	D-stem	CAG	0	117.333	0
EBT00001514730	LeuP	13	D-stem	CAG	G	G	NA	0.333333	NA		EBT00051367983	Leu1	G	13	D-stem	CAG	0	117.333	0.0712401
EBT00001514730	LeuP	14	D-loop	CAG	A	A	NA	3.33333	NA		EBT00051367983	Leu1	A	14	D-loop	CAG	0	126.333	0.294227
EBT00001514730	LeuP	15	D-loop	CAG	A	A	NA	5.33333	NA		EBT00051367983	Leu1	A	15	D-loop	CAG	0	179	0.0773196
EBT00001514730	LeuP	16	D-loop	CAG	T	DD	NA	17	NA		EBT00051367983	Leu1	T	16	D-loop	CAG	0.00320513	194	0
EBT00001514730	LeuP	17	D-loop	CAG	T	DD	NA	17	NA		EBT00051367983	Leu1	T	17	D-loop	CAG	0.00420227	194	0
EBT00001514730	LeuP	18	D-loop	CAG	G	Gm	NA	17	NA		EBT00051367983	Leu1	G	18	D-loop	CAG	0	194	0
EBT00001514730	LeuP	19	D-loop	CAG	G	G	NA	19.6667	NA		EBT00051367983	Leu1	G	19	D-loop	CAG	0	194	0.176803
EBT00001514730	LeuP	20	D-loop	CAG	T	D	NA	20	NA		EBT00051367983	Leu1	T	20	D-loop	CAG	0	235.667	0
EBT00001514730	LeuP	20a	D-loop	CAG	A	A	NA	20	NA		EBT00051367983	Leu1	A	20a	D-loop	CAG	0	235.667	0
EBT00001514730	LeuP	21	D-loop	CAG	G	G	NA	20	NA		EBT00051367983	Leu1	G	21	D-loop	CAG	0	235.667	0.105063
EBT00001514730	LeuP	22	D-stem	CAG	A	A	NA	20	NA		EBT00051367983	Leu1	A	22	D-stem	CAG	0.00521993	263.333	0
EBT00001514730	LeuP	23	D-stem	CAG	C	C	NA	20	NA		EBT00051367983	Leu1	C	23	D-stem	CAG	0	263.333	0
EBT00001514730	LeuP	24	D-stem	CAG	G	G	NA	20	NA		EBT00051367983	Leu1	G	24	D-stem	CAG	0.00231763	263.333	0
EBT00001514730	LeuP	25	D-stem	CAG	C	C	NA	20	NA		EBT00051367983	Leu1	C	25	D-stem	CAG	0	263.333	0
EBT00001514730	LeuP	26	0	CAG	G	G	NA	20	NA		EBT00051367983	Leu1	A	26	0	CAG	0.00231763	263.333	0.0538922
EBT00001514730	LeuP	27	Ac-Stem	CAG	C	C	NA	20	NA		EBT00051367983	Leu1	C	27	Ac-stem	CAG	0	278.333	0
EBT00001514730	LeuP	28	Ac-Stem	CAG	T	U	NA	20	NA		EBT00051367983	Leu1	T	28	Ac-stem	CAG	0.00707743	278.333	0
EBT00001514730	LeuP	29	Ac-Stem	CAG	A	A	NA	20	NA		EBT00051367983	Leu1	A	29	Ac-stem	CAG	0	278.333	0
EBT00001514730	LeuP	30	Ac-Stem	CAG	G	G	NA	20	NA		EBT00051367983	Leu1	G	30	Ac-stem	CAG	0.00246914	278.333	0
EBT00001514730	LeuP	31	Ac-Stem	CAG	C	C	NA	20	NA		EBT00051367983	Leu1	G	31	Ac-stem	CAG	0.00123457	278.333	0.20928
EBT00001514730	LeuP	32	Ac-loop	CAG	T	U	NA	20	NA		EBT00051367983	Leu1	T	32	Ac-loop	CAG	0.00390122	352	0.101277
EBT00001514730	LeuP	33	Ac-loop	CAG	T	U	NA	20	NA		EBT00051367983	Leu1	T	33	Ac-loop	CAG	0.00366869	391.667	0.0191987
EBT00001514730	LeuP	34	Ac-loop	CAG	C	C	NA	20	NA		EBT00051367983	Leu1	C	34	Ac-loop	CAG	0.001287	399.333	0
EBT00001514730	LeuP	35	Ac-loop	CAG	A	A	NA	20.6667	NA		EBT00051367983	Leu1	A	35	Ac-loop	CAG	0.0687136	373	0.142529
EBT00001514730	LeuP	36	Ac-loop	CAG	G	G	NA	21.6667	NA		EBT00051367983	Leu1	G	36	Ac-loop	CAG	0.00047619	435	0
EBT00001514730	LeuP	37	Ac-loop	CAG	G	m1G	NA	21.6667	NA		EBT00051367983	Leu1	G	37	Ac-loop	CAG	0.677731	435	0.723693
EBT00001514730	LeuP	38	Ac-loop	CAG	T	Y	0	244.333	0.0626598		EBT00051367983	Leu1	T	38	Ac-loop	CAG	0.000942826	1574.33	0.0223556
EBT00001514730	LeuP	39	Ac-stem	CAG	G	G	0.00155763	260.667	0.158235		EBT00051367983	Leu1	C	39	Ac-stem	CAG	0.000583598	1610.33	0.0564453
EBT00001514730	LeuP	40	Ac-stem	CAG	T	Y	0.000727802	309.667	0.00321888		EBT00051367983	Leu1	C	40	Ac-stem	CAG	0.000541652	1706.67	0.0315869
EBT00001514730	LeuP	41	Ac-stem	CAG	T	U	0	310.667	0		EBT00051367983	Leu1	T	41	Ac-stem	CAG	0.00235178	1762.33	0
EBT00001514730	LeuP	42	Ac-stem	CAG	A	A	0	310.667	0		EBT00051367983	Leu1	A	42	Ac-stem	CAG	0.000781742	1762.33	0.0106662
EBT00001514730	LeuP	43	Ac-stem	CAG	G	G	0	310.667	0.0210084		EBT00051367983	Leu1	G	43	Ac-stem	CAG	0.00558992	1781.33	0.0196294
EBT00001514730	LeuP	44	V-region	CAG	T	U	0	317.333	0.00314136		EBT00051367983	Leu1	C	44	V-region	CAG	0.0028602	1817	0.0107078
EBT00001514730	LeuP	V1	V-region	CAG	G	G	0	318.333	0.00104602		EBT00051367983	Leu1	G	V1	V-region	CAG	0.00239338	1836.67	0.000181455
EBT00001514730	LeuP	V2	V-region	CAG	T	U	0	318.667	0.00104493		EBT00051367983	Leu1	G	V2	V-region	CAG	0.00204335	1837	0.00595238
EBT00001514730	LeuP	V3	V-region	CAG	T	C	0	319	0		EBT00051367983	Leu1	T	V3	V-region	CAG	0.0063625	1848	0.00162075
EBT00001514730	LeuP	V4	V-region	CAG	C	C	0.000706215	319	0		EBT00051367983	Leu1	G	V4	V-region	CAG	0.00476783	1851	0.00572963
EBT00001514730	LeuP	V8	V-region	CAG	T	U	0	319	0		EBT00051367983	Leu1	G	V8	V-region	CAG	0.00219154	1861.67	0.143536
EBT00001514730	LeuP	V9	V-region	CAG	T	U	0	319	0		EBT00051367983	Leu1	C	V9	V-region	CAG	0.00496775	2173.67	0.0539678
EBT00001514730	LeuP	V10	V-region	CAG	A	A	0	319	0		EBT00051367983	Leu1	A	V10	V-region	CAG	0.000868205	2297.67	0.0344586
EBT00001514730	LeuP	V11	V-region	CAG	C	C	0	319	0		EBT00051367983	Leu1	A	V11	V-region	CAG	0.00151163	2379.67	0.038389
EBT00001514730	LeuP	V16	V-region	CAG	G	G	0	319	0		EBT00051367983	Leu1	C	V16	V-region	CAG	0.00240003	2474.67	0.0457584
EBT00001514730	LeuP	V17	V-region	CAG	G	G	0	319	0		EBT00051367983	Leu1	A	V17	V-region	CAG	0.00141265	2593.33	0.0439912
EBT00001514730	LeuP	V18	V-region	CAG	A	A	0	319	0		EBT00051367983	Leu1	C	V18	V-region	CAG	0.000543509	2712.67	0.011899
EBT00001514730	LeuP	V19	V-region	CAG	C	C	0	319	0		EBT00051367983	Leu1	C	V19	V-region	CAG	0.00508174	2745.33	0.00399081
EBT00001514730	LeuP	46	V-region	CAG	G	G	0	319	0		EBT00051367983	Leu1	G	46	V-region	CAG	0.00139362	2756.33	0.029574
EBT00001514730	LeuP	48	V-region	CAG	T	U	0	319	0		EBT00051367983	Leu1	T	48	V-region	CAG	0.00413458	2840.33	0.000703647
EBT00001514730	LeuP	49	T-stem	CAG	G	G	0	318.667	0.00104493		EBT00051367983	Leu1	G	49	T-stem	CAG	0.00206349	2842.33	0.00698731
EBT00001514730	LeuP	50	T-stem	CAG	G	G	0	319	0		EBT00051367983	Leu1	G	50	T-stem	CAG	0.00164642	2862.33	0.0170559
EBT00001514730	LeuP	51	T-stem	CAG	G	G	0.00349562	319	0		EBT00051367983	Leu1	A	51	T-stem	CAG	0.000707264	2912	0.0117647
EBT00001514730	LeuP	52	T-stem	CAG	G	G	0	319	0		EBT00051367983	Leu1	A	52	T-stem	CAG	0.000495085	2946.67	0.00214471
EBT00001514730	LeuP	53	T-stem	CAG	G	G	0.00206123	319	0		EBT00051367983	Leu1	G	53	T-stem	CAG	0.00130879	2953	0.0289378
EBT00001514730	LeuP	54	T-loop	CAG	T	T	0.160699	319	0		EBT00051367983	Leu1	T	54	T-loop	CAG	0.00551781	3041	0
EBT00001514730	LeuP	55	T-loop	CAG	T	Y	0.0027894	319	0		EBT00051367983	Leu1	T	55	T-loop	CAG	0.00213601	3041	0
EBT00001514730	LeuP	56	T-loop	CAG	C	C	0.499479	319	0		EBT00051367983	Leu1	C	56	T-loop	CAG	0.00426983	3041	0
EBT00001514730	LeuP	57	T-loop	CAG	A	A	0.0658129	319	0		EBT00051367983	Leu1	G	57	T-loop	CAG	0.00369861	3041	0
EBT00001514730	LeuP	58	T-loop	CAG	A	A	0.0123496	319	0		EBT00051367983	Leu1	A	58	T-loop	CAG	0.000667168	3041	0
EBT00001514730	LeuP	59	T-loop	CAG	G	G	0.113689	319	0		EBT00051367983	Leu1	G	59	T-loop	CAG	0.00154425	3041	0
EBT00001514730	LeuP	60	T-loop	CAG	T	U	0.0858558	319	0		EBT00051367983	Leu1	T	60	T-loop	CAG	0.00296901	3041	0
EBT00001514730	LeuP	61	T-stem	CAG	C	C	0.688262	318.333	0.00208986		EBT00051367983	Leu1	C	61	T-stem	CAG	0.000829285	3041	0
EBT00001514730	LeuP	62	T-stem	CAG	C	C	0.0657952	319	0		EBT00051367983	Leu1	T	62	T-stem	CAG	0.00447287	3041	0
EBT00001514730	LeuP	63	T-stem	CAG	C	C	0.0138634	319	0		EBT00051367983	Leu1	T	63	T-stem	CAG	0.00288971	3041	0
EBT00001514730	LeuP	64	T-stem	CAG	C	C	0.00414441	319	0		EBT00051367983	Leu1	C	64	T-stem	CAG	0.00181346	3041	0
EBT00001514730	LeuP	65	T-stem	CAG	C	C	0.00420183	319	0		EBT00051367983	Leu1	T	65	T-stem	CAG	0.00426629	3041	0
EBT00001514730	LeuP	66	Acc-stem	CAG	C	C	0.00414441	319	0		EBT00051367983	Leu1	C	66	Acc-stem	CAG	0.00426815	3041	0
EBT00001514730	LeuP	67	Acc-stem	CAG	C	C	0.0013947	319	0		EBT00051367983	Leu1	C	67	Acc-stem	CAG	0.00148922	3041	0
EBT00001514730	LeuP	68	Acc-stem	CAG	C	C	0.00274971	319	0		EBT00051367983	Leu1	T	68	Acc-stem	CAG	0.00843882	3041	0
EBT00001514730	LeuP	69	Acc-stem	CAG	T	U	0.496059	318.667	0.00104493		EBT00051367983	Leu1	G	69	Acc-stem	CAG	0.00517123	3035.67	0.00175381
EBT00001514730	LeuP	70	Acc-stem	CAG	C	C	0.0394851	319	0		EBT00051367983	Leu1	G	70	Acc-stem	CAG	0.00668059	3041	0
EBT00001514730	LeuP	71	Acc-stem	CAG	G	G	0.0546553	319	0		EBT00051367983	Leu1	G	71	Acc-stem	CAG	0.00396632	3040.67	0
EBT00001514730	LeuP	72	Acc-stem	CAG	C	C	0.0118596	319	0		EBT00051367983	Leu1	C	72	Acc-stem	CAG	0.0019924	3040.67	0
EBT00001514730	LeuP	73	0	CAG	A	A	0.356333	319	0		EBT00051367983	Leu1	A	73	0	CAG	0.00371054	3040.67	0.000109613
EBT00001514730	LeuP	74	0	CAG	C	C	0.0104252	319	0		EBT00051367983	Leu1	C	74	0	CAG	0.000932484	3041	0
EBT00001514730	LeuP	75	0	CAG	C	C	0	319	0		EBT00051367983	Leu1	C	75	0	CAG	0	2901.33	0
EBT00001514730	LeuP	76	0	CAG	A	A	0	104.667	0		EBT00051367983	Leu1	A	76	0	CAG	0	2534.67	0
EBT00001514597	MetT	1	Acc-stem	CAU	G	G	0	188.333	0.00528169		EBT00051369313	Met1	G	1	Acc-stem	CAU	NA	48.3333	NA
EBT00001514597	MetT	2	Acc-stem	CAU	G	G	0	189.333	0.0206897		EBT00051369313	Met1	G	2	Acc-stem	CAU	NA	48.6667	NA
EBT00001514597	MetT	3	Acc-stem	CAU	C	C	0.00194932	193.333	0.0349418		EBT00051369313	Met1	C	3	Acc-stem	CAU	NA	48.6667	NA
EBT00001514597	MetT	4	Acc-stem	CAU	T	U	0.00168776	200.333	0.0259319		EBT00051369313	Met1	T	4	Acc-stem	CAU	NA	48.6667	NA
EBT00001514597	MetT	5	Acc-stem	CAU	A	A	0.0150212	205.667	0.00483871		EBT00051369313	Met1	A	5	Acc-stem	CAU	NA	48.6667	NA
EBT00001514597	MetT	6	Acc-stem	CAU	C	C	0	206.667	0		EBT00051369313	Met1	C	6	Acc-stem	CAU	NA	48.6667	NA
EBT00001514597	MetT	7	Acc-stem	CAU	G	G	0.000843882	206.667	0		EBT00051369313	Met1	A	7	Acc-stem	CAU	NA	46	NA
EBT00001514597	MetT	8	0	CAU	T	s4U	0.241255	206.667	0.00161031		EBT00051369313	Met1	T	8	0	CAU	NA	46	NA
EBT00001514597	MetT	9	0	CAU	A	A	0	207	0		EBT00051369313	Met1	A	9	0	CAU	NA	58	NA
EBT00001514597	MetT	10	D-stem	CAU	G	G	0	207	0		EBT00051369313	Met1	G	10	D-stem	CAU	NA	58	NA
EBT00001514597	MetT	11	D-stem	CAU	C	C	0.000843882	207	0.0533537		EBT00051369313	Met1	C	11	D-stem	CAU	NA	58	NA
EBT00001514597	MetT	12	D-stem	CAU	T	U	0	218.667	0		EBT00051369313	Met1	T	12	D-stem	CAU	NA	65	NA
EBT00001514597	MetT	13	D-stem	CAU	C	C	0.000788022	218.667	0		EBT00051369313	Met1	C	13	D-stem	CAU	NA	65	NA
EBT00001514597	MetT	14	D-loop	CAU	A	A	0	218.667	0		EBT00051369313	Met1	A	14	D-loop	CAU	NA	65	NA
EBT00001514597	MetT	15	D-loop	CAU	G	G	0.00643774	218.667	0		EBT00051369313	Met1	G	15	D-loop	CAU	NA	65	NA
EBT00001514597	MetT	16	D-loop	CAU	T	DD	0.00236407	218.667	0		EBT00051369313	Met1	T	16	D-loop	CAU	NA	88.6667	NA
EBT00001514597	MetT	17	D-loop	CAU	T	DD	0.00236407	218.667	0		EBT00051369313	Met1	C	17	D-loop	CAU	NA	88.6667	NA
EBT00001514597	MetT	18	D-loop	CAU	G	Gm	0	218.667	0.0223547		EBT00051369313	Met1	G	18	D-loop	CAU	NA	88.6667	NA
EBT00001514597	MetT	19	D-loop	CAU	G	G	0.000788022	223.667	0		EBT00051369313	Met1	G	19	D-loop	CAU	NA	88.6667	NA
EBT00001514597	MetT	20	D-loop	CAU	T	DD	0.000788022	223.667	0		EBT00051369313	Met1	T	20	D-loop	CAU	0.0126048	128.333	0.0677966
EBT00001514597	MetT	20a	D-loop	CAU	T	DD	0.00255169	223.667	0.0261248		EBT00051369313	Met1	T	20a	D-loop	CAU	0.00333333	137.667	0.00241546
EBT00001514597	MetT	21	D-loop	CAU	A	A	0	229.667	0		EBT00051369313	Met1	A	21	D-loop	CAU	0	138	0
EBT00001514597	MetT	22	D-stem	CAU	G	G	0.00327538	229.667	0		EBT00051369313	Met1	G	22	D-stem	CAU	0	138	0.0416667
EBT00001514597	MetT	23	D-stem	CAU	A	A	0.00151172	229.667	0		EBT00051369313	Met1	A	23	D-stem	CAU	0.00333333	144	0
EBT00001514597	MetT	24	D-stem	CAU	G	G	0.000755858	229.667	0		EBT00051369313	Met1	G	24	D-stem	CAU	0.0046056	144	0.0226244
EBT00001514597	MetT	25	D-stem	CAU	C	C	0.00251953	229.667	0.0171184		EBT00051369313	Met1	C	25	D-stem	CAU	0	147.333	0
EBT00001514597	MetT	26	0	CAU	A	A	0.000735835	233.667	0		EBT00051369313	Met1	G	26	0	CAU	0	147.333	0
EBT00001514597	MetT	27	Ac-Stem	CAU	C	C	0.00176367	233.667	0.0263889		EBT00051369313	Met1	C	27	Ac-stem	CAU	0	147.333	0
EBT00001514597	MetT	28	Ac-Stem	CAU	A	A	0.000721501	240	0.00138696		EBT00051369313	Met1	A	28	Ac-stem	CAU	0.00127227	147.333	0
EBT00001514597	MetT	29	Ac-Stem	CAU	T	U	0	240.333	0		EBT00051369313	Met1	G	29	Ac-stem	CAU	0.00127227	147.333	0
EBT00001514597	MetT	30	Ac-Stem	CAU	C	C	0.00238817	240.333	0		EBT00051369313	Met1	C	30	Ac-stem	CAU	0.00266667	143.333	0.664848
EBT00001514597	MetT	31	Ac-Stem	CAU	A	A	0.00564972	240.333	0		EBT00051369313	Met1	A	31	Ac-stem	CAU	0.000613874	427.667	0.609318
EBT00001514597	MetT	32	Ac-loop	CAU	C	C	0.00166667	237	0.0742188		EBT00051369313	Met1	T	32	Ac-loop	CAU	0.000545108	1094.67	0.105177
EBT00001514597	MetT	33	Ac-loop	CAU	T	U	0	256	0.654987		EBT00051369313	Met1	T	33	Ac-loop	CAU	0.000809783	1223.33	0.0390154
EBT00001514597	MetT	34	Ac-loop	CAU	C	ac4C	0.000877314	742	0.531861		EBT00051369313	Met1	C	34	Ac-loop	CAU	0.0131233	1273	0.278345
EBT00001514597	MetT	35	Ac-loop	CAU	A	A	0	1585	0.354817		EBT00051369313	Met1	A	35	Ac-loop	CAU	0.00369384	1764	0.490419
EBT00001514597	MetT	36	Ac-loop	CAU	T	U	0.000566921	2456.67	0.203243		EBT00051369313	Met1	T	36	Ac-loop	CAU	0.00151951	3461.67	0.0487313
EBT00001514597	MetT	37	Ac-loop	CAU	A	ct6A	0.17617	3083.33	0.780123		EBT00051369313	Met1	A	37	Ac-loop	CAU	0.0167677	3639	0.268003
EBT00001514597	MetT	38	Ac-loop	CAU	A	A	0.0149194	14023	0.223733		EBT00051369313	Met1	A	38	Ac-loop	CAU	0.00710992	4971.33	0.112684
EBT00001514597	MetT	39	Ac-stem	CAU	T	Y	0.000544732	18064.7	0.0290598		EBT00051369313	Met1	T	39	Ac-stem	CAU	0.00299303	5602.67	0.00567913
EBT00001514597	MetT	40	Ac-stem	CAU	G	G	0.00144003	18605.3	0.00981036		EBT00051369313	Met1	G	40	Ac-stem	CAU	0.0065933	5634.67	0.00300796
EBT00001514597	MetT	41	Ac-stem	CAU	A	A	0.000617181	18789.7	0.00180624		EBT00051369313	Met1	C	41	Ac-stem	CAU	0.00540061	5651.67	0
EBT00001514597	MetT	42	Ac-stem	CAU	T	U	0.00279548	18823.7	0		EBT00051369313	Met1	T	42	Ac-stem	CAU	0.00387327	5336.33	0.125096
EBT00001514597	MetT	43	Ac-stem	CAU	G	G	0.0021179	14464	0.237399		EBT00051369313	Met1	G	43	Ac-stem	CAU	0.00993659	6099.33	0.228291
EBT00001514597	MetT	44	V-region	CAU	G	G	0.00172922	18966.7	0.015179		EBT00051369313	Met1	A	44	V-region	CAU	0.0148256	7903.67	0.172882
EBT00001514597	MetT	45	V-region	CAU	G	G	0.00154147	19259	0.00260668		EBT00051369313	Met1	T	45	V-region	CAU	0.00352943	9555.67	0.018018
EBT00001514597	MetT	46	V-region	CAU	G	m7G	0.00157516	19309.3	0.204504		EBT00051369313	Met1	G	46	V-region	CAU	0.0974804	9731	0.628545
EBT00001514597	MetT	47	V-region	CAU	T	acp3U	0.44733	24273.3	0.15888		EBT00051369313	Met1	T	47	V-region	CAU	0.0805584	26197	0.173257
EBT00001514597	MetT	48	V-region	CAU	C	C	0.00239145	28858.3	0.0244961		EBT00051369313	Met1	C	48	V-region	CAU	0.00086357	31687	0.00746534
EBT00001514597	MetT	49	T-stem	CAU	A	A	0.00182243	29583	0.00307786		EBT00051369313	Met1	C	49	T-stem	CAU	0.0030268	31925.3	0.00551362
EBT00001514597	MetT	50	T-stem	CAU	C	C	0.00130846	29674.3	0.00587388		EBT00051369313	Met1	C	50	T-stem	CAU	0.00245665	32102.3	0.0041568
EBT00001514597	MetT	51	T-stem	CAU	A	A	0.000993723	29849.7	0.00117117		EBT00051369313	Met1	A	51	T-stem	CAU	0.000764219	32236.3	0.000372112
EBT00001514597	MetT	52	T-stem	CAU	G	G	0.00173119	29884.7	0.00106964		EBT00051369313	Met1	G	52	T-stem	CAU	0.00115509	32248.3	0.00126977
EBT00001514597	MetT	53	T-stem	CAU	G	G	0.00172759	29916.7	0.0146675		EBT00051369313	Met1	G	53	T-stem	CAU	0.000835558	32289.3	0.0121256
EBT00001514597	MetT	54	T-loop	CAU	T	T	0.00153255	30362	7.68444e-05		EBT00051369313	Met1	T	54	T-loop	CAU	0.00119735	32685.7	2.03957e-05
EBT00001514597	MetT	55	T-loop	CAU	T	Y	0.00049911	30364.3	0		EBT00051369313	Met1	T	55	T-loop	CAU	0.000502997	32686.3	0
EBT00001514597	MetT	56	T-loop	CAU	C	C	0.000382059	30364.3	0		EBT00051369313	Met1	C	56	T-loop	CAU	0.000318056	32686	1.01978e-05
EBT00001514597	MetT	57	T-loop	CAU	G	G	2.12e-05	30364.3	0		EBT00051369313	Met1	A	57	T-loop	CAU	7.13e-05	32686.3	0
EBT00001514597	MetT	58	T-loop	CAU	A	A	5.16e-05	30364.3	0		EBT00051369313	Met1	A	58	T-loop	CAU	5.64e-05	32686.3	0
EBT00001514597	MetT	59	T-loop	CAU	A	A	0.000486858	30364.3	0		EBT00051369313	Met1	G	59	T-loop	CAU	0.000542762	32686	1.01978e-05
EBT00001514597	MetT	60	T-loop	CAU	T	U	0.000752596	30364.3	0		EBT00051369313	Met1	T	60	T-loop	CAU	0.000598411	32686.3	0
EBT00001514597	MetT	61	T-stem	CAU	C	C	0.000610348	30363.3	3.29334e-05		EBT00051369313	Met1	C	61	T-stem	CAU	0.00035975	32685.3	3.05938e-05
EBT00001514597	MetT	62	T-stem	CAU	C	C	0.00084258	30364.3	0		EBT00051369313	Met1	C	62	T-stem	CAU	0.00109446	32686.3	0
EBT00001514597	MetT	63	T-stem	CAU	C	C	0.00118898	30363.7	0		EBT00051369313	Met1	C	63	T-stem	CAU	0.000410836	32686	1.01978e-05
EBT00001514597	MetT	64	T-stem	CAU	G	G	0.00107824	30363.7	0		EBT00051369313	Met1	G	64	T-stem	CAU	0.000567162	32686.3	0
EBT00001514597	MetT	65	T-stem	CAU	T	U	0.00113066	30363.7	1.09778e-05		EBT00051369313	Met1	G	65	T-stem	CAU	0.000992559	32686.3	0
EBT00001514597	MetT	66	Acc-stem	CAU	C	C	0.000590545	30364	0		EBT00051369313	Met1	T	66	Acc-stem	CAU	0.00157726	32686.3	0
EBT00001514597	MetT	67	Acc-stem	CAU	G	G	0.000783812	30364	0		EBT00051369313	Met1	G	67	Acc-stem	CAU	0.000800738	32686.3	0
EBT00001514597	MetT	68	Acc-stem	CAU	T	U	0.00209866	30364	0		EBT00051369313	Met1	T	68	Acc-stem	CAU	0.00248672	32686	0
EBT00001514597	MetT	69	Acc-stem	CAU	A	A	0.000865222	30363.7	0		EBT00051369313	Met1	A	69	Acc-stem	CAU	0.00078544	32685.3	1.01984e-05
EBT00001514597	MetT	70	Acc-stem	CAU	G	G	0.00310316	30363	0		EBT00051369313	Met1	G	70	Acc-stem	CAU	0.00284007	32685.7	0
EBT00001514597	MetT	71	Acc-stem	CAU	C	C	0.0036865	30359.7	8.78279e-05		EBT00051369313	Met1	C	71	Acc-stem	CAU	0.0034299	32679.7	0.000152977
EBT00001514597	MetT	72	Acc-stem	CAU	C	C	0.00263174	30362.3	0		EBT00051369313	Met1	C	72	Acc-stem	CAU	0.00212938	32684.7	0
EBT00001514597	MetT	73	0	CAU	A	A	0.00308309	30362.3	0		EBT00051369313	Met1	A	73	0	CAU	0.00257645	32683.3	4.07941e-05
EBT00001514597	MetT	74	0	CAU	C	C	0.00118908	30362.3	1.09786e-05		EBT00051369313	Met1	C	74	0	CAU	0.0010255	32684.7	0
EBT00001514597	MetT	75	0	CAU	C	C	0	30362.7	0		EBT00051369313	Met1	C	75	0	CAU	0	30353.3	0
EBT00001514597	MetT	76	0	CAU	A	A	0	26325.7	0		EBT00051369313	Met1	A	76	0	CAU	0	26504	0
EBT00001514651	MetV	1	Acc-stem	CAU	C	C	NA	1	NA		EBT00051369436	fMet1	C	1	Acc-stem	CAU	NA	0	NA
EBT00001514651	MetV	2	Acc-stem	CAU	G	G	NA	1	NA		EBT00051369436	fMet1	G	2	Acc-stem	CAU	NA	0	NA
EBT00001514651	MetV	3	Acc-stem	CAU	C	C	NA	1	NA		EBT00051369436	fMet1	C	3	Acc-stem	CAU	NA	0	NA
EBT00001514651	MetV	4	Acc-stem	CAU	G	G	NA	1	NA		EBT00051369436	fMet1	G	4	Acc-stem	CAU	NA	0	NA
EBT00001514651	MetV	5	Acc-stem	CAU	G	G	NA	1	NA		EBT00051369436	fMet1	G	5	Acc-stem	CAU	NA	0	NA
EBT00001514651	MetV	6	Acc-stem	CAU	G	G	NA	1	NA		EBT00051369436	fMet1	G	6	Acc-stem	CAU	NA	0	NA
EBT00001514651	MetV	7	Acc-stem	CAU	G	G	NA	1	NA		EBT00051369436	fMet1	G	7	Acc-stem	CAU	NA	0	NA
EBT00001514651	MetV	8	0	CAU	T	s4U	NA	1	NA		EBT00051369436	fMet1	T	8	0	CAU	NA	0	NA
EBT00001514651	MetV	9	0	CAU	G	G	NA	1	NA		EBT00051369436	fMet1	G	9	0	CAU	NA	0	NA
EBT00001514651	MetV	10	D-stem	CAU	G	G	NA	1	NA		EBT00051369436	fMet1	G	10	D-stem	CAU	NA	0	NA
EBT00001514651	MetV	11	D-stem	CAU	A	A	NA	1	NA		EBT00051369436	fMet1	A	11	D-stem	CAU	NA	0	NA
EBT00001514651	MetV	12	D-stem	CAU	G	G	NA	1	NA		EBT00051369436	fMet1	G	12	D-stem	CAU	NA	0	NA
EBT00001514651	MetV	13	D-stem	CAU	C	C	NA	1	NA		EBT00051369436	fMet1	C	13	D-stem	CAU	NA	0	NA
EBT00001514651	MetV	14	D-loop	CAU	A	A	NA	1	NA		EBT00051369436	fMet1	A	14	D-loop	CAU	NA	0	NA
EBT00001514651	MetV	15	D-loop	CAU	G	G	NA	1	NA		EBT00051369436	fMet1	G	15	D-loop	CAU	NA	0	NA
EBT00001514651	MetV	16	D-loop	CAU	C	C	NA	1	NA		EBT00051369436	fMet1	T	16	D-loop	CAU	NA	0.333333	NA
EBT00001514651	MetV	17	D-loop	CAU	C	C	NA	1	NA		EBT00051369436	fMet1	C	17	D-loop	CAU	NA	0.333333	NA
EBT00001514651	MetV	17a	D-loop	CAU	T	U	NA	1	NA		EBT00051369436	fMet1	T	18	D-loop	CAU	NA	0.333333	NA
EBT00001514651	MetV	18	D-loop	CAU	G	G	NA	1	NA		EBT00051369436	fMet1	G	19	D-loop	CAU	NA	0.333333	NA
EBT00001514651	MetV	19	D-loop	CAU	G	G	NA	1	NA		EBT00051369436	fMet1	G	20	D-loop	CAU	NA	0.333333	NA
EBT00001514651	MetV	20	D-loop	CAU	T	D	NA	7	NA		EBT00051369436	fMet1	T	20a	D-loop	CAU	NA	3	NA
EBT00001514651	MetV	21	D-loop	CAU	A	A	NA	7	NA		EBT00051369436	fMet1	A	21	D-loop	CAU	NA	4	NA
EBT00001514651	MetV	22	D-stem	CAU	G	G	NA	7	NA		EBT00051369436	fMet1	G	22	D-stem	CAU	NA	4	NA
EBT00001514651	MetV	23	D-stem	CAU	C	C	NA	7	NA		EBT00051369436	fMet1	C	23	D-stem	CAU	NA	4.66667	NA
EBT00001514651	MetV	24	D-stem	CAU	T	U	NA	23.3333	NA		EBT00051369436	fMet1	T	24	D-stem	CAU	NA	6.66667	NA
EBT00001514651	MetV	25	D-stem	CAU	C	C	NA	23.3333	NA		EBT00051369436	fMet1	C	25	D-stem	CAU	NA	6.66667	NA
EBT00001514651	MetV	26	0	CAU	G	G	NA	24.3333	NA		EBT00051369436	fMet1	G	26	0	CAU	NA	6.66667	NA
EBT00001514651	MetV	27	Ac-Stem	CAU	T	U	NA	25.3333	NA		EBT00051369436	fMet1	T	27	Ac-stem	CAU	NA	6.66667	NA
EBT00001514651	MetV	28	Ac-Stem	CAU	C	C	NA	25.3333	NA		EBT00051369436	fMet1	C	28	Ac-stem	CAU	NA	7.33333	NA
EBT00001514651	MetV	29	Ac-Stem	CAU	G	G	NA	25.3333	NA		EBT00051369436	fMet1	G	29	Ac-stem	CAU	NA	7.33333	NA
EBT00001514651	MetV	30	Ac-Stem	CAU	G	G	NA	25.3333	NA		EBT00051369436	fMet1	G	30	Ac-stem	CAU	NA	7.33333	NA
EBT00001514651	MetV	31	Ac-Stem	CAU	G	G	NA	25.3333	NA		EBT00051369436	fMet1	G	31	Ac-stem	CAU	NA	7.33333	NA
EBT00001514651	MetV	32	Ac-loop	CAU	C	Cm	NA	25.3333	NA		EBT00051369436	fMet1	C	32	Ac-loop	CAU	NA	7.33333	NA
EBT00001514651	MetV	33	Ac-loop	CAU	T	U	NA	25.3333	NA		EBT00051369436	fMet1	T	33	Ac-loop	CAU	NA	7.66667	NA
EBT00001514651	MetV	34	Ac-loop	CAU	C	C	NA	26.6667	NA		EBT00051369436	fMet1	C	34	Ac-loop	CAU	NA	7.66667	NA
EBT00001514651	MetV	35	Ac-loop	CAU	A	A	NA	55	NA		EBT00051369436	fMet1	A	35	Ac-loop	CAU	NA	13	NA
EBT00001514651	MetV	36	Ac-loop	CAU	T	U	0.00292398	126	0.0526316		EBT00051369436	fMet1	T	36	Ac-loop	CAU	NA	27.3333	NA
EBT00001514651	MetV	37	Ac-loop	CAU	A	A	0.0157788	133	0.278481		EBT00051369436	fMet1	A	37	Ac-loop	CAU	NA	30.6667	NA
EBT00001514651	MetV	38	Ac-loop	CAU	A	A	0.0222971	184.333	0.2066		EBT00051369436	fMet1	A	38	Ac-loop	CAU	NA	41	NA
EBT00001514651	MetV	39	Ac-stem	CAU	C	C	0.00470086	232.333	0.0517007		EBT00051369436	fMet1	C	39	Ac-stem	CAU	NA	47.6667	NA
EBT00001514651	MetV	40	Ac-stem	CAU	C	C	0.00466122	245	0.0134228		EBT00051369436	fMet1	C	40	Ac-stem	CAU	NA	53	NA
EBT00001514651	MetV	41	Ac-stem	CAU	C	C	0.00526186	248.333	0.00534045		EBT00051369436	fMet1	C	41	Ac-stem	CAU	NA	59.3333	NA
EBT00001514651	MetV	42	Ac-stem	CAU	G	G	0.00343643	249.667	0.00133333		EBT00051369436	fMet1	G	42	Ac-stem	CAU	NA	59.6667	NA
EBT00001514651	MetV	43	Ac-stem	CAU	A	A	0	250	0.00265957		EBT00051369436	fMet1	A	43	Ac-stem	CAU	NA	60.3333	NA
EBT00001514651	MetV	44	V-region	CAU	A	A	0	250.667	0		EBT00051369436	fMet1	A	44	V-region	CAU	NA	64	NA
EBT00001514651	MetV	45	V-region	CAU	G	G	0	250.667	0		EBT00051369436	fMet1	G	45	V-region	CAU	NA	70.6667	NA
EBT00001514651	MetV	46	V-region	CAU	G	m7G	0	250.667	0.00265252		EBT00051369436	fMet1	G	46	V-region	CAU	NA	77.3333	NA
EBT00001514651	MetV	47	V-region	CAU	T	U	0	251.333	0.0026455		EBT00051369436	fMet1	T	47	V-region	CAU	0.0552779	215.667	0.00614439
EBT00001514651	MetV	48	V-region	CAU	C	C	0.00134409	252	0		EBT00051369436	fMet1	C	48	V-region	CAU	0.0162249	217	0.00913242
EBT00001514651	MetV	49	T-stem	CAU	G	G	0.0510204	252	0		EBT00051369436	fMet1	G	49	T-stem	CAU	0.0353417	219	0.0478261
EBT00001514651	MetV	50	T-stem	CAU	T	U	0.00134409	252	0		EBT00051369436	fMet1	T	50	T-stem	CAU	0.0603259	230	0.00576369
EBT00001514651	MetV	51	T-stem	CAU	C	C	0.172224	252	0		EBT00051369436	fMet1	T	51	T-stem	CAU	0.0952717	231.333	0.00143885
EBT00001514651	MetV	52	T-stem	CAU	G	G	0	252	0		EBT00051369436	fMet1	G	52	T-stem	CAU	0.0132291	231.667	0.00143678
EBT00001514651	MetV	53	T-stem	CAU	G	G	0.00438885	252	0		EBT00051369436	fMet1	G	53	T-stem	CAU	0.012368	232	0.0224719
EBT00001514651	MetV	54	T-loop	CAU	T	T	0.00170068	252	0		EBT00051369436	fMet1	T	54	T-loop	CAU	0.0173722	237.333	0.0111111
EBT00001514651	MetV	55	T-loop	CAU	T	Y	0.00134409	252	0		EBT00051369436	fMet1	T	55	T-loop	CAU	0.00910662	240	0
EBT00001514651	MetV	56	T-loop	CAU	C	C	0.00411314	252	0		EBT00051369436	fMet1	C	56	T-loop	CAU	0	240	0
EBT00001514651	MetV	57	T-loop	CAU	A	A	0.0021575	250.667	0.005291		EBT00051369436	fMet1	A	57	T-loop	CAU	0	240	0
EBT00001514651	MetV	58	T-loop	CAU	A	A	0.0126151	252	0		EBT00051369436	fMet1	A	58	T-loop	CAU	0	240	0
EBT00001514651	MetV	59	T-loop	CAU	A	A	0.0229782	252	0		EBT00051369436	fMet1	A	59	T-loop	CAU	0	240	0
EBT00001514651	MetV	60	T-loop	CAU	T	U	0.0565578	252	0		EBT00051369436	fMet1	T	60	T-loop	CAU	0.00260417	240	0
EBT00001514651	MetV	61	T-stem	CAU	C	C	0.12879	252	0		EBT00051369436	fMet1	C	61	T-stem	CAU	0	240	0
EBT00001514651	MetV	62	T-stem	CAU	C	C	0.0985494	252	0		EBT00051369436	fMet1	C	62	T-stem	CAU	0	240	0
EBT00001514651	MetV	63	T-stem	CAU	G	G	0.238455	251.667	0.00132275		EBT00051369436	fMet1	A	63	T-stem	CAU	0.00260417	240	0
EBT00001514651	MetV	64	T-stem	CAU	G	G	0.0565248	252	0		EBT00051369436	fMet1	G	64	T-stem	CAU	0.00260417	240	0
EBT00001514651	MetV	65	T-stem	CAU	C	C	0.108109	250.667	0.005291		EBT00051369436	fMet1	C	65	T-stem	CAU	0	239.667	0.00138889
EBT00001514651	MetV	66	Acc-stem	CAU	C	C	0.128468	252	0		EBT00051369436	fMet1	C	66	Acc-stem	CAU	0	240	0
EBT00001514651	MetV	67	Acc-stem	CAU	C	C	0.174258	252	0		EBT00051369436	fMet1	C	67	Acc-stem	CAU	0	240	0
EBT00001514651	MetV	68	Acc-stem	CAU	C	C	0.0544239	252	0		EBT00051369436	fMet1	C	68	Acc-stem	CAU	0.0033149	240	0
EBT00001514651	MetV	69	Acc-stem	CAU	C	C	0.0370673	251.667	0		EBT00051369436	fMet1	C	69	Acc-stem	CAU	0.0118437	240	0
EBT00001514651	MetV	70	Acc-stem	CAU	G	G	0.0258247	250	0.00662252		EBT00051369436	fMet1	G	70	Acc-stem	CAU	0.00284293	240	0
EBT00001514651	MetV	71	Acc-stem	CAU	C	C	0.0101045	251.667	0		EBT00051369436	fMet1	C	71	Acc-stem	CAU	0.00284293	240	0
EBT00001514651	MetV	72	Acc-stem	CAU	A	A	0.00902439	251.667	0.00132275		EBT00051369436	fMet1	A	72	Acc-stem	CAU	0.00260417	240	0
EBT00001514651	MetV	73	0	CAU	A	A	0.0336155	252	0		EBT00051369436	fMet1	A	73	0	CAU	0.00402563	240	0
EBT00001514651	MetV	74	0	CAU	C	C	0.00759398	252	0		EBT00051369436	fMet1	C	74	0	CAU	0	240	0
EBT00001514651	MetV	75	0	CAU	C	C	0	252	0		EBT00051369436	fMet1	C	75	0	CAU	0	213.333	0
EBT00001514651	MetV	76	0	CAU	A	A	0	215.667	0		EBT00051369436	fMet1	A	76	0	CAU	0	177.667	0
EBT00001514641	TrpT	1	Acc-stem	CCA	A	A	0	499.667	0.00133245		EBT00051366328	Trp1	A	1	Acc-stem	CCA	NA	73.6667	NA
EBT00001514641	TrpT	2	Acc-stem	CCA	G	G	0	500.333	0.000665779		EBT00051366328	Trp1	G	2	Acc-stem	CCA	NA	73.6667	NA
EBT00001514641	TrpT	3	Acc-stem	CCA	G	G	0	500.667	0		EBT00051366328	Trp1	G	3	Acc-stem	CCA	NA	74.3333	NA
EBT00001514641	TrpT	4	Acc-stem	CCA	G	G	0	500.667	0		EBT00051366328	Trp1	C	4	Acc-stem	CCA	NA	74.3333	NA
EBT00001514641	TrpT	5	Acc-stem	CCA	G	G	0	500.667	0		EBT00051366328	Trp1	C	5	Acc-stem	CCA	NA	74.3333	NA
EBT00001514641	TrpT	6	Acc-stem	CCA	C	C	0	500.667	0		EBT00051366328	Trp1	A	6	Acc-stem	CCA	NA	74.3333	NA
EBT00001514641	TrpT	7	Acc-stem	CCA	G	G	0.0188763	500.667	0.0144357		EBT00051366328	Trp1	G	7	Acc-stem	CCA	NA	74.3333	NA
EBT00001514641	TrpT	8	0	CCA	T	s4U	0.0849592	508	0		EBT00051366328	Trp1	T	8	0	CCA	NA	74.3333	NA
EBT00001514641	TrpT	9	0	CCA	A	A	0	508	0		EBT00051366328	Trp1	A	9	0	CCA	NA	74.3333	NA
EBT00001514641	TrpT	10	D-stem	CCA	G	G	0.00129424	508	0		EBT00051366328	Trp1	G	10	D-stem	CCA	NA	74.3333	NA
EBT00001514641	TrpT	11	D-stem	CCA	T	U	0.00584434	508	0		EBT00051366328	Trp1	C	11	D-stem	CCA	NA	74.6667	NA
EBT00001514641	TrpT	12	D-stem	CCA	T	U	0.00524455	508	0		EBT00051366328	Trp1	T	12	D-stem	CCA	NA	74.6667	NA
EBT00001514641	TrpT	13	D-stem	CCA	C	C	0.00358519	508	0.0078125		EBT00051366328	Trp1	C	13	D-stem	CCA	NA	74.6667	NA
EBT00001514641	TrpT	14	D-loop	CCA	A	A	0	512	0		EBT00051366328	Trp1	A	14	D-loop	CCA	NA	87	NA
EBT00001514641	TrpT	15	D-loop	CCA	A	A	0.00272567	512	0.0241423		EBT00051366328	Trp1	A	15	D-loop	CCA	0	100	NA
EBT00001514641	TrpT	16	D-loop	CCA	T	DD	0.00269906	524.667	0		EBT00051366328	Trp1	T	16	D-loop	CCA	0	154.333	0.0354167
EBT00001514641	TrpT	17	D-loop	CCA	T	DD	0.00326022	524.667	0.0094399		EBT00051366328	Trp1	T	17	D-loop	CCA	0.00258398	160	0.002079
EBT00001514641	TrpT	18	D-loop	CCA	G	G	0.0018735	529.667	0.0118159		EBT00051366328	Trp1	G	18	D-loop	CCA	0.00520833	160.333	0
EBT00001514641	TrpT	19	D-loop	CCA	G	G	0.00262989	536	0		EBT00051366328	Trp1	G	19	D-loop	CCA	0	160.333	0
EBT00001514641	TrpT	20	D-loop	CCA	T	D	0.00375222	536	0		EBT00051366328	Trp1	C	20	D-loop	CCA	0.0167864	160.333	0.0243408
EBT00001514641	TrpT	21	D-loop	CCA	A	A	0.00122123	536	0		EBT00051366328	Trp1	A	21	D-loop	CCA	0	164.333	0
EBT00001514641	TrpT	22	D-stem	CCA	G	G	0	536	0		EBT00051366328	Trp1	G	22	D-stem	CCA	0.02932	164.333	0
EBT00001514641	TrpT	23	D-stem	CCA	A	A	0.00121605	536	0		EBT00051366328	Trp1	A	23	D-stem	CCA	0	164.333	0
EBT00001514641	TrpT	24	D-stem	CCA	G	G	0.000561167	536	0		EBT00051366328	Trp1	G	24	D-stem	CCA	0.00632316	164.333	0
EBT00001514641	TrpT	25	D-stem	CCA	C	C	0.00234357	536	0		EBT00051366328	Trp1	C	25	D-stem	CCA	0.00111483	164.333	0
EBT00001514641	TrpT	26	0	CCA	A	A	0.0017824	536	0		EBT00051366328	Trp1	G	26	0	CCA	0.00632316	164.333	0
EBT00001514641	TrpT	27	Ac-Stem	CCA	C	C	0.000660066	536	0		EBT00051366328	Trp1	G	27	Ac-stem	CCA	0	164.333	0
EBT00001514641	TrpT	28	Ac-Stem	CCA	C	C	0.00253099	536	0		EBT00051366328	Trp1	C	28	Ac-stem	CCA	0	164.333	0
EBT00001514641	TrpT	29	Ac-Stem	CCA	G	G	0.00318068	536	0		EBT00051366328	Trp1	G	29	Ac-stem	CCA	0.00334448	164.333	0
EBT00001514641	TrpT	30	Ac-Stem	CCA	G	G	0.0018813	536	0.0104615		EBT00051366328	Trp1	G	30	Ac-stem	CCA	0.00111483	164.333	0
EBT00001514641	TrpT	31	Ac-Stem	CCA	T	U	0.0049579	541.667	0		EBT00051366328	Trp1	T	31	Ac-stem	CCA	0	164.333	0
EBT00001514641	TrpT	32	Ac-loop	CCA	C	Cm	0.00297695	541.667	0		EBT00051366328	Trp1	C	32	Ac-loop	CCA	0.00111483	164.333	0.0389864
EBT00001514641	TrpT	33	Ac-loop	CCA	T	U	0.00253954	536	0		EBT00051366328	Trp1	T	33	Ac-loop	CCA	0	171	0
EBT00001514641	TrpT	34	Ac-loop	CCA	C	C	0.000695894	533.667	0.0970107		EBT00051366328	Trp1	C	34	Ac-loop	CCA	0.00520833	164.333	0.281341
EBT00001514641	TrpT	35	Ac-loop	CCA	C	C	0.00669042	591	0.14513		EBT00051366328	Trp1	C	35	Ac-loop	CCA	0.00215054	228.667	0.277134
EBT00001514641	TrpT	36	Ac-loop	CCA	A	A	0.00828307	691.333	0.392857		EBT00051366328	Trp1	A	36	Ac-loop	CCA	0.000764526	316.333	0.321173
EBT00001514641	TrpT	37	Ac-loop	CCA	A	ms2i6A	0.00531237	1138.67	0.470141		EBT00051366328	Trp1	A	37	Ac-loop	CCA	0.0206804	466	0.609388
EBT00001514641	TrpT	38	Ac-loop	CCA	A	A	0.0291709	2149	0.383298		EBT00051366328	Trp1	A	38	Ac-loop	CCA	0.0528233	1193	0.505868
EBT00001514641	TrpT	39	Ac-stem	CCA	A	A	0.00817015	3484.67	0.0630937		EBT00051366328	Trp1	A	39	Ac-stem	CCA	0.00781982	2414.33	0.0889308
EBT00001514641	TrpT	40	Ac-stem	CCA	C	C	0.000843459	3719.33	0.0153547		EBT00051366328	Trp1	C	40	Ac-stem	CCA	0.000524862	2650	0.0194869
EBT00001514641	TrpT	41	Ac-stem	CCA	C	C	0.0036124	3777.33	0.0015859		EBT00051366328	Trp1	C	41	Ac-stem	CCA	0.00486875	2702.67	0.00331899
EBT00001514641	TrpT	42	Ac-stem	CCA	G	G	0.0020219	3783.33	0.000352299		EBT00051366328	Trp1	G	42	Ac-stem	CCA	0.00170694	2711.67	0
EBT00001514641	TrpT	43	Ac-stem	CCA	G	G	0.00161468	3784.67	0.00237237		EBT00051366328	Trp1	C	43	Ac-stem	CCA	0.0022338	2711.67	0.00623015
EBT00001514641	TrpT	44	V-region	CCA	G	G	0.00112259	3793.67	0.00749978		EBT00051366328	Trp1	A	44	V-region	CCA	0.000823835	2728.67	0.00619157
EBT00001514641	TrpT	45	V-region	CCA	T	U	0.00561039	3822.33	0.00260938		EBT00051366328	Trp1	G	45	V-region	CCA	0.00136641	2745.67	0.0037494
EBT00001514641	TrpT	46	V-region	CCA	G	m7G	0.00324127	3832.33	0.0109257		EBT00051366328	Trp1	G	46	V-region	CCA	0.00118527	2756	0.0899285
EBT00001514641	TrpT	47	V-region	CCA	T	U	0.00553674	3874.67	0.00197476		EBT00051366328	Trp1	T	47	V-region	CCA	0.00704836	3028.33	0.00460173
EBT00001514641	TrpT	48	V-region	CCA	T	U	0.0078863	3882.33	0		EBT00051366328	Trp1	T	48	V-region	CCA	0.00601306	3042.33	0
EBT00001514641	TrpT	49	T-stem	CCA	G	G	0.00609435	3880.67	0.000772466		EBT00051366328	Trp1	G	49	T-stem	CCA	0.00438864	3036.67	0.00339131
EBT00001514641	TrpT	50	T-stem	CCA	G	G	0.00257374	3883.67	0		EBT00051366328	Trp1	G	50	T-stem	CCA	0.00243364	3047	0.000109385
EBT00001514641	TrpT	51	T-stem	CCA	G	G	0.00179272	3883.67	0		EBT00051366328	Trp1	G	51	T-stem	CCA	0.00314434	3047.33	0.000218723
EBT00001514641	TrpT	52	T-stem	CCA	A	A	0.00106353	3883.67	8.58221e-05		EBT00051366328	Trp1	G	52	T-stem	CCA	0.00233945	3048	0
EBT00001514641	TrpT	53	T-stem	CCA	G	G	0.00153557	3884	0.00614125		EBT00051366328	Trp1	G	53	T-stem	CCA	0.00145372	3048	0.00489716
EBT00001514641	TrpT	54	T-loop	CCA	T	T	0.00267506	3908	0		EBT00051366328	Trp1	T	54	T-loop	CCA	0.0025294	3063	0
EBT00001514641	TrpT	55	T-loop	CCA	T	Y	0.00122785	3908	0		EBT00051366328	Trp1	T	55	T-loop	CCA	0.00048407	3063	0
EBT00001514641	TrpT	56	T-loop	CCA	C	C	0.000777958	3908	0		EBT00051366328	Trp1	C	56	T-loop	CCA	0	3063	0
EBT00001514641	TrpT	57	T-loop	CCA	G	G	0.000424781	3908	0		EBT00051366328	Trp1	G	57	T-loop	CCA	0.000198438	3063	0
EBT00001514641	TrpT	58	T-loop	CCA	A	A	0.000399675	3908	0		EBT00051366328	Trp1	A	58	T-loop	CCA	0.000311624	3063	0
EBT00001514641	TrpT	59	T-loop	CCA	G	G	0.000710147	3908	0		EBT00051366328	Trp1	T	59	T-loop	CCA	0.0021884	3063	0
EBT00001514641	TrpT	60	T-loop	CCA	T	U	0.00334614	3908	0		EBT00051366328	Trp1	T	60	T-loop	CCA	0.00300839	3063	0
EBT00001514641	TrpT	61	T-stem	CCA	C	C	0.00134034	3908	0		EBT00051366328	Trp1	C	61	T-stem	CCA	0.00636022	3063	0
EBT00001514641	TrpT	62	T-stem	CCA	T	U	0.00280144	3908	0		EBT00051366328	Trp1	C	62	T-stem	CCA	0.00562523	3063	0
EBT00001514641	TrpT	63	T-stem	CCA	C	C	0.00343801	3908	0		EBT00051366328	Trp1	C	63	T-stem	CCA	0.00204947	3063	0
EBT00001514641	TrpT	64	T-stem	CCA	T	U	0.00318352	3908	0		EBT00051366328	Trp1	T	64	T-stem	CCA	0.00290115	3062.33	0.000217652
EBT00001514641	TrpT	65	T-stem	CCA	C	C	0.00466691	3907.67	8.5295e-05		EBT00051366328	Trp1	C	65	T-stem	CCA	0.00358304	3063	0
EBT00001514641	TrpT	66	Acc-stem	CCA	C	C	0.00592457	3908	0		EBT00051366328	Trp1	C	66	Acc-stem	CCA	0.00380433	3063	0
EBT00001514641	TrpT	67	Acc-stem	CCA	G	G	0.00502311	3908	0		EBT00051366328	Trp1	T	67	Acc-stem	CCA	0.00647824	3063	0
EBT00001514641	TrpT	68	Acc-stem	CCA	C	C	0.00303437	3907.33	8.53026e-05		EBT00051366328	Trp1	G	68	Acc-stem	CCA	0.00583216	3062.33	0.000217652
EBT00001514641	TrpT	69	Acc-stem	CCA	C	C	0.00320895	3907.67	8.5295e-05		EBT00051366328	Trp1	G	69	Acc-stem	CCA	0.00312496	3063	0
EBT00001514641	TrpT	70	Acc-stem	CCA	C	C	0.00760328	3908	0		EBT00051366328	Trp1	C	70	Acc-stem	CCA	0.00366558	3062.33	0.000108838
EBT00001514641	TrpT	71	Acc-stem	CCA	C	C	0.00335449	3908	0		EBT00051366328	Trp1	C	71	Acc-stem	CCA	0.00389456	3062.67	0.000108826
EBT00001514641	TrpT	72	Acc-stem	CCA	T	U	0.0103528	3908	0		EBT00051366328	Trp1	T	72	Acc-stem	CCA	0.00719303	3063	0
EBT00001514641	TrpT	73	0	CCA	G	G	0.00637053	3907.33	8.53026e-05		EBT00051366328	Trp1	G	73	0	CCA	0.00619102	3062	0.000108849
EBT00001514641	TrpT	74	0	CCA	C	C	0.00187965	3907.67	8.5295e-05		EBT00051366328	Trp1	C	74	0	CCA	0.00230318	3062.33	0
EBT00001514641	TrpT	75	0	CCA	C	C	0	3908	0		EBT00051366328	Trp1	C	75	0	CCA	0	2904	0
EBT00001514641	TrpT	76	0	CCA	A	A	0	3401.33	0		EBT00051366328	Trp1	A	76	0	CCA	0	2532.67	0
EBT00001514729	GlyU	1	Acc-stem	CCC	G	G	NA	88	NA		EBT00051368279	Gly1	G	1	Acc-stem	CCC	0	104	0.0877193
EBT00001514729	GlyU	2	Acc-stem	CCC	C	C	NA	88.6667	NA		EBT00051368279	Gly1	C	2	Acc-stem	CCC	0	114	0
EBT00001514729	GlyU	3	Acc-stem	CCC	G	G	NA	88.6667	NA		EBT00051368279	Gly1	G	3	Acc-stem	CCC	0	114	0.00291545
EBT00001514729	GlyU	4	Acc-stem	CCC	G	G	NA	88.6667	NA		EBT00051368279	Gly1	G	4	Acc-stem	CCC	0	114.333	0
EBT00001514729	GlyU	5	Acc-stem	CCC	G	G	NA	88.6667	NA		EBT00051368279	Gly1	G	5	Acc-stem	CCC	0	114.333	0
EBT00001514729	GlyU	6	Acc-stem	CCC	C	C	NA	88.6667	NA		EBT00051368279	Gly1	C	6	Acc-stem	CCC	0	114.333	0
EBT00001514729	GlyU	7	Acc-stem	CCC	G	G	NA	88.6667	NA		EBT00051368279	Gly1	G	7	Acc-stem	CCC	0.0472222	114.333	0
EBT00001514729	GlyU	8	0	CCC	T	s4U	NA	90.3333	NA		EBT00051368279	Gly1	T	8	0	CCC	0.0119989	114.333	0
EBT00001514729	GlyU	9	0	CCC	A	A	NA	90.3333	NA		EBT00051368279	Gly1	C	9	0	CCC	0.0222222	114.333	0
EBT00001514729	GlyU	10	D-stem	CCC	G	G	NA	90.3333	NA		EBT00051368279	Gly1	G	10	D-stem	CCC	0.00560264	114.333	0.0754717
EBT00001514729	GlyU	11	D-stem	CCC	T	U	NA	98	NA		EBT00051368279	Gly1	T	11	D-stem	CCC	0	123.667	0
EBT00001514729	GlyU	12	D-stem	CCC	T	U	0.00438597	106	0		EBT00051368279	Gly1	A	12	D-stem	CCC	0.0190476	123.667	0.0388601
EBT00001514729	GlyU	13	D-stem	CCC	C	C	0.00821498	106	0		EBT00051368279	Gly1	T	13	D-stem	CCC	0.0190476	128.667	0
EBT00001514729	GlyU	14	D-loop	CCC	A	A	0.0123457	106	0		EBT00051368279	Gly1	A	14	D-loop	CCC	0.00282486	128.667	0
EBT00001514729	GlyU	15	D-loop	CCC	A	A	0	106	0		EBT00051368279	Gly1	A	15	D-loop	CCC	0	128.667	0
EBT00001514729	GlyU	16	D-loop	CCC	T	U	0	106	0		EBT00051368279	Gly1	T	16	D-loop	CCC	0	128.667	0
EBT00001514729	GlyU	18	D-loop	CCC	G	G	0	106	0		EBT00051368279	Gly1	G	18	D-loop	CCC	0.0621296	128.667	0
EBT00001514729	GlyU	19	D-loop	CCC	G	G	0	106	0.00625		EBT00051368279	Gly1	G	19	D-loop	CCC	0	128.667	0.0277078
EBT00001514729	GlyU	20	D-loop	CCC	T	D	0.00292398	106.667	0		EBT00051368279	Gly1	C	20	D-loop	CCC	0.0172414	132.333	0.109865
EBT00001514729	GlyU	21	D-loop	CCC	A	A	0	106.667	0		EBT00051368279	Gly1	A	21	D-loop	CCC	0	148.667	0.0408602
EBT00001514729	GlyU	22	D-stem	CCC	G	G	0.00292398	106.667	0		EBT00051368279	Gly1	T	22	D-stem	CCC	0.0148389	155	0.0292276
EBT00001514729	GlyU	23	D-stem	CCC	A	A	0.00292398	106.667	0.0615836		EBT00051368279	Gly1	T	23	D-stem	CCC	0.0119048	159.667	0
EBT00001514729	GlyU	24	D-stem	CCC	A	A	0	113.667	0		EBT00051368279	Gly1	A	24	D-stem	CCC	0.00185185	159.667	0
EBT00001514729	GlyU	25	D-stem	CCC	C	C	0.00913242	113.667	0		EBT00051368279	Gly1	C	25	D-stem	CCC	0	159.667	0.0303644
EBT00001514729	GlyU	26	0	CCC	G	G	0.00438597	113.667	0.00292398		EBT00051368279	Gly1	C	26	0	CCC	0.0157407	164.667	0
EBT00001514729	GlyU	27	Ac-Stem	CCC	A	A	0.00292398	114	0.293388		EBT00051368279	Gly1	T	27	Ac-stem	CCC	0.0141879	164.667	0.229329
EBT00001514729	GlyU	28	Ac-Stem	CCC	G	G	0	161.333	0		EBT00051368279	Gly1	G	28	Ac-stem	CCC	0	213.667	0
EBT00001514729	GlyU	29	Ac-Stem	CCC	A	A	0	161.333	0		EBT00051368279	Gly1	A	29	Ac-stem	CCC	0	213.667	0
EBT00001514729	GlyU	30	Ac-Stem	CCC	G	G	0.00362319	161.333	0		EBT00051368279	Gly1	G	30	Ac-stem	CCC	0	213.667	0
EBT00001514729	GlyU	31	Ac-Stem	CCC	C	C	0	160.333	0.097561		EBT00051368279	Gly1	C	31	Ac-stem	CCC	0	213.667	0.0404192
EBT00001514729	GlyU	32	Ac-loop	CCC	T	U	0.00359103	177.667	0.0549645		EBT00051368279	Gly1	T	32	Ac-loop	CCC	0.0372267	222.667	0
EBT00001514729	GlyU	33	Ac-loop	CCC	T	U	0.000966184	188	0		EBT00051368279	Gly1	T	33	Ac-loop	CCC	0.00426694	209.333	0
EBT00001514729	GlyU	34	Ac-loop	CCC	C	C	0.022797	187.333	0.124611		EBT00051368279	Gly1	C	34	Ac-loop	CCC	0.0236626	193.667	0.134128
EBT00001514729	GlyU	35	Ac-loop	CCC	C	C	0.0035461	214	0.53343		EBT00051368279	Gly1	C	35	Ac-loop	CCC	0.0367046	223.667	0.635722
EBT00001514729	GlyU	36	Ac-loop	CCC	C	C	0.0083632	458.667	0.651734		EBT00051368279	Gly1	C	36	Ac-loop	CCC	0.00068306	614	0.660085
EBT00001514729	GlyU	37	Ac-loop	CCC	A	A	0.00030303	1317	0.353778		EBT00051368279	Gly1	A	37	Ac-loop	CCC	0.000181653	1806.33	0.190348
EBT00001514729	GlyU	38	Ac-loop	CCC	A	A	0.000155473	2038	0.175789		EBT00051368279	Gly1	A	38	Ac-loop	CCC	0.000303168	2231	0.123379
EBT00001514729	GlyU	39	Ac-stem	CCC	G	G	0.000728702	2472.67	0.0465296		EBT00051368279	Gly1	G	39	Ac-stem	CCC	0.000909334	2545	0.00663544
EBT00001514729	GlyU	40	Ac-stem	CCC	C	C	0.0007839	2593.33	0.0113102		EBT00051368279	Gly1	C	40	Ac-stem	CCC	0.00127947	2562	0.00517732
EBT00001514729	GlyU	41	Ac-stem	CCC	T	U	0.00178729	2623	0.00291434		EBT00051368279	Gly1	T	41	Ac-stem	CCC	0.00218499	2575.33	0.00322539
EBT00001514729	GlyU	42	Ac-stem	CCC	C	C	0.00233063	2630.67	0		EBT00051368279	Gly1	C	42	Ac-stem	CCC	0.00312457	2583.67	0.015621
EBT00001514729	GlyU	43	Ac-stem	CCC	T	U	0.00565222	2585	0.0290472		EBT00051368279	Gly1	A	43	Ac-stem	CCC	0.00372046	2624.67	0.00101497
EBT00001514729	GlyU	44	V-region	CCC	A	A	0.00225144	2662.33	0.0134634		EBT00051368279	Gly1	T	44	V-region	CCC	0.00917787	2627.33	0
EBT00001514729	GlyU	45	V-region	CCC	T	U	0.0113331	2698.67	0.0482013		EBT00051368279	Gly1	G	45	V-region	CCC	0.0113937	2511.33	0.201145
EBT00001514729	GlyU	46	V-region	CCC	A	A	0.000241822	2835.33	0.000587475		EBT00051368279	Gly1	A	46	V-region	CCC	0.000862993	3143.67	0.000635795
EBT00001514729	GlyU	48	V-region	CCC	C	C	0.00209811	2837	0.00129078		EBT00051368279	Gly1	C	48	V-region	CCC	0.004607	3145.67	0.00348469
EBT00001514729	GlyU	49	T-stem	CCC	G	G	0.00436506	2840.67	0.00128911		EBT00051368279	Gly1	G	49	T-stem	CCC	0.00333078	3156.67	0.00158144
EBT00001514729	GlyU	50	T-stem	CCC	A	A	0.00119163	2844.33	0.000936659		EBT00051368279	Gly1	A	50	T-stem	CCC	0.00107256	3161.67	0
EBT00001514729	GlyU	51	T-stem	CCC	G	G	0.00205198	2847	0.000117068		EBT00051368279	Gly1	G	51	T-stem	CCC	0.00495687	3161.33	0.00010543
EBT00001514729	GlyU	52	T-stem	CCC	G	G	0.00240918	2847.33	0.000935673		EBT00051368279	Gly1	G	52	T-stem	CCC	0.00219415	3161.67	0
EBT00001514729	GlyU	53	T-stem	CCC	G	G	0.00267144	2850	0.00616064		EBT00051368279	Gly1	G	53	T-stem	CCC	0.00158909	3161.67	0.00586941
EBT00001514729	GlyU	54	T-loop	CCC	T	T	0.00142685	2867.67	0		EBT00051368279	Gly1	T	54	T-loop	CCC	0.00147732	3180.33	0
EBT00001514729	GlyU	55	T-loop	CCC	T	Y	0.00047129	2867.67	0		EBT00051368279	Gly1	T	55	T-loop	CCC	0.000830104	3180.33	0
EBT00001514729	GlyU	56	T-loop	CCC	C	C	0	2867.67	0		EBT00051368279	Gly1	C	56	T-loop	CCC	0.000403364	3180.33	0
EBT00001514729	GlyU	57	T-loop	CCC	G	G	0.000138141	2867.67	0		EBT00051368279	Gly1	G	57	T-loop	CCC	0.000201682	3180.33	0
EBT00001514729	GlyU	58	T-loop	CCC	A	A	0.000338401	2867.67	0		EBT00051368279	Gly1	A	58	T-loop	CCC	0.000450115	3180.33	0
EBT00001514729	GlyU	59	T-loop	CCC	T	U	0.00216392	2867.67	0		EBT00051368279	Gly1	T	59	T-loop	CCC	0.00348451	3180.33	0
EBT00001514729	GlyU	60	T-loop	CCC	T	U	0.0027001	2867.67	0		EBT00051368279	Gly1	T	60	T-loop	CCC	0.00368451	3180.33	0
EBT00001514729	GlyU	61	T-stem	CCC	C	C	0.00341007	2867.33	0.000116239		EBT00051368279	Gly1	C	61	T-stem	CCC	0.00832577	3180.33	0
EBT00001514729	GlyU	62	T-stem	CCC	C	C	0.00319302	2867.67	0		EBT00051368279	Gly1	C	62	T-stem	CCC	0.00334379	3180.33	0
EBT00001514729	GlyU	63	T-stem	CCC	C	C	0.00230483	2867.67	0		EBT00051368279	Gly1	C	63	T-stem	CCC	0.000651797	3180.33	0
EBT00001514729	GlyU	64	T-stem	CCC	T	U	0.0033204	2864	0.00127862		EBT00051368279	Gly1	T	64	T-stem	CCC	0.00436182	3180.33	0
EBT00001514729	GlyU	65	T-stem	CCC	T	U	0.00246183	2867.67	0		EBT00051368279	Gly1	T	65	T-stem	CCC	0.00535771	3180.33	0
EBT00001514729	GlyU	66	Acc-stem	CCC	C	C	0.00249966	2864	0.00127862		EBT00051368279	Gly1	C	66	Acc-stem	CCC	0.00317221	3180.33	0
EBT00001514729	GlyU	67	Acc-stem	CCC	G	G	0.00693493	2867.67	0		EBT00051368279	Gly1	G	67	Acc-stem	CCC	0.00500568	3180.33	0
EBT00001514729	GlyU	68	Acc-stem	CCC	C	C	0.00155755	2867	0.000232477		EBT00051368279	Gly1	C	68	Acc-stem	CCC	0.00261873	3180	0.000104811
EBT00001514729	GlyU	69	Acc-stem	CCC	C	C	0.0133611	2867.67	0		EBT00051368279	Gly1	C	69	Acc-stem	CCC	0.0114046	3180.33	0
EBT00001514729	GlyU	70	Acc-stem	CCC	C	C	0.00476327	2867.67	0		EBT00051368279	Gly1	C	70	Acc-stem	CCC	0.00502447	3180.33	0
EBT00001514729	GlyU	71	Acc-stem	CCC	G	G	0.00618776	2867.33	0		EBT00051368279	Gly1	G	71	Acc-stem	CCC	0.00803634	3171.67	0.00272508
EBT00001514729	GlyU	72	Acc-stem	CCC	C	C	0.00112661	2867.33	0		EBT00051368279	Gly1	C	72	Acc-stem	CCC	0.00181055	3180.33	0
EBT00001514729	GlyU	73	0	CCC	T	U	0.00531365	2867.33	0		EBT00051368279	Gly1	T	73	0	CCC	0.0055018	3180	0.000104811
EBT00001514729	GlyU	74	0	CCC	C	C	0.00166035	2867	0.000232477		EBT00051368279	Gly1	C	74	0	CCC	0.00178213	3180.33	0
EBT00001514729	GlyU	75	0	CCC	C	C	0	2867.67	0		EBT00051368279	Gly1	C	75	0	CCC	0	3020.67	0
EBT00001514729	GlyU	76	0	CCC	A	A	0	2470.33	0		EBT00051368279	Gly1	A	76	0	CCC	0	2555.67	0
EBT00001514671	ArgX	1	Acc-stem	CCG	G	G	NA	5.66667	NA		EBT00051365344	Arg1	G	1	Acc-stem	CCG	NA	54	NA
EBT00001514671	ArgX	2	Acc-stem	CCG	C	C	NA	5.66667	NA		EBT00051365344	Arg1	C	2	Acc-stem	CCG	NA	54.6667	NA
EBT00001514671	ArgX	3	Acc-stem	CCG	G	G	NA	5.66667	NA		EBT00051365344	Arg1	A	3	Acc-stem	CCG	NA	54.6667	NA
EBT00001514671	ArgX	4	Acc-stem	CCG	C	C	NA	5.66667	NA		EBT00051365344	Arg1	T	4	Acc-stem	CCG	NA	54.6667	NA
EBT00001514671	ArgX	5	Acc-stem	CCG	C	C	NA	5.66667	NA		EBT00051365344	Arg1	C	5	Acc-stem	CCG	NA	54.6667	NA
EBT00001514671	ArgX	6	Acc-stem	CCG	C	C	NA	5.66667	NA		EBT00051365344	Arg1	C	6	Acc-stem	CCG	NA	54.6667	NA
EBT00001514671	ArgX	7	Acc-stem	CCG	G	G	NA	5.66667	NA		EBT00051365344	Arg1	G	7	Acc-stem	CCG	NA	54.6667	NA
EBT00001514671	ArgX	8	0	CCG	T	U	NA	5.66667	NA		EBT00051365344	Arg1	T	8	0	CCG	NA	54.6667	NA
EBT00001514671	ArgX	9	0	CCG	A	A	NA	5.66667	NA		EBT00051365344	Arg1	A	9	0	CCG	NA	54.6667	NA
EBT00001514671	ArgX	10	D-stem	CCG	G	G	NA	5.66667	NA		EBT00051365344	Arg1	G	10	D-stem	CCG	NA	54.6667	NA
EBT00001514671	ArgX	11	D-stem	CCG	C	C	NA	5.66667	NA		EBT00051365344	Arg1	C	11	D-stem	CCG	NA	54.6667	NA
EBT00001514671	ArgX	12	D-stem	CCG	T	U	NA	5.66667	NA		EBT00051365344	Arg1	T	12	D-stem	CCG	NA	66	NA
EBT00001514671	ArgX	13	D-stem	CCG	C	C	NA	5.66667	NA		EBT00051365344	Arg1	C	13	D-stem	CCG	NA	66	NA
EBT00001514671	ArgX	14	D-loop	CCG	A	A	NA	5.66667	NA		EBT00051365344	Arg1	A	14	D-loop	CCG	NA	66	NA
EBT00001514671	ArgX	15	D-loop	CCG	G	G	NA	5.66667	NA		EBT00051365344	Arg1	G	15	D-loop	CCG	NA	66	NA
EBT00001514671	ArgX	16	D-loop	CCG	C	C	NA	5.66667	NA		EBT00051365344	Arg1	C	16	D-loop	CCG	NA	73.3333	NA
EBT00001514671	ArgX	17	D-loop	CCG	T	D	NA	5.66667	NA		EBT00051365344	Arg1	T	17	D-loop	CCG	NA	86.6667	NA
EBT00001514671	ArgX	18	D-loop	CCG	G	G	NA	5.66667	NA		EBT00051365344	Arg1	G	18	D-loop	CCG	NA	95.3333	NA
EBT00001514671	ArgX	19	D-loop	CCG	G	G	NA	5.66667	NA		EBT00051365344	Arg1	G	19	D-loop	CCG	NA	95.3333	NA
EBT00001514671	ArgX	20	D-loop	CCG	A	A	NA	9.66667	NA		EBT00051365344	Arg1	A	20	D-loop	CCG	0	259.333	0.29337
EBT00001514671	ArgX	20a	D-loop	CCG	T	D	NA	9.66667	NA		EBT00051365344	Arg1	T	20a	D-loop	CCG	0.000441501	367	0.0282436
EBT00001514671	ArgX	21	D-loop	CCG	A	A	NA	9.66667	NA		EBT00051365344	Arg1	A	21	D-loop	CCG	0	377.667	0.0332765
EBT00001514671	ArgX	22	D-stem	CCG	G	G	NA	15.6667	NA		EBT00051365344	Arg1	G	22	D-stem	CCG	0	390.667	0.0298013
EBT00001514671	ArgX	23	D-stem	CCG	A	A	NA	15.6667	NA		EBT00051365344	Arg1	A	23	D-stem	CCG	0	402.667	0.00821018
EBT00001514671	ArgX	24	D-stem	CCG	G	G	NA	15.6667	NA		EBT00051365344	Arg1	G	24	D-stem	CCG	0.00040016	406	0.0201126
EBT00001514671	ArgX	25	D-stem	CCG	C	C	NA	15.6667	NA		EBT00051365344	Arg1	T	25	D-stem	CCG	0.000393082	414.333	0
EBT00001514671	ArgX	26	0	CCG	G	G	NA	15.6667	NA		EBT00051365344	Arg1	A	26	0	CCG	0	414.333	0
EBT00001514671	ArgX	27	Ac-Stem	CCG	C	C	NA	15.6667	NA		EBT00051365344	Arg1	C	27	Ac-stem	CCG	0.00540374	414.333	0
EBT00001514671	ArgX	28	Ac-Stem	CCG	T	U	NA	15.6667	NA		EBT00051365344	Arg1	T	28	Ac-stem	CCG	0.00961391	414.333	0
EBT00001514671	ArgX	29	Ac-Stem	CCG	G	G	NA	15.6667	NA		EBT00051365344	Arg1	G	29	Ac-stem	CCG	0.00611155	414.333	0
EBT00001514671	ArgX	30	Ac-Stem	CCG	C	C	NA	15.6667	NA		EBT00051365344	Arg1	C	30	Ac-stem	CCG	0.00537508	414.333	0
EBT00001514671	ArgX	31	Ac-Stem	CCG	C	C	NA	15.6667	NA		EBT00051365344	Arg1	C	31	Ac-stem	CCG	0.00801292	414.333	0.0134921
EBT00001514671	ArgX	32	Ac-loop	CCG	C	s2C	NA	15.6667	NA		EBT00051365344	Arg1	C	32	Ac-loop	CCG	0.00533971	420	0.325482
EBT00001514671	ArgX	33	Ac-loop	CCG	T	U	NA	15.6667	NA		EBT00051365344	Arg1	T	33	Ac-loop	CCG	0.00583974	622.667	0
EBT00001514671	ArgX	34	Ac-loop	CCG	C	C	NA	15.6667	NA		EBT00051365344	Arg1	C	34	Ac-loop	CCG	0.00406686	622.667	0.0988905
EBT00001514671	ArgX	35	Ac-loop	CCG	C	C	NA	19	NA		EBT00051365344	Arg1	C	35	Ac-loop	CCG	0.00571104	691	0.0193945
EBT00001514671	ArgX	36	Ac-loop	CCG	G	G	NA	30	NA		EBT00051365344	Arg1	G	36	Ac-loop	CCG	0.00121203	704.667	0.156088
EBT00001514671	ArgX	37	Ac-loop	CCG	G	m1G	NA	35	NA		EBT00051365344	Arg1	A	37	Ac-loop	CCG	0	835	0.225896
EBT00001514671	ArgX	38	Ac-loop	CCG	A	A	0.00983284	236	0.345656		EBT00051365344	Arg1	A	38	Ac-loop	CCG	0	1078.67	0.256946
EBT00001514671	ArgX	39	Ac-stem	CCG	G	G	0	360.667	0.00733945		EBT00051365344	Arg1	G	39	Ac-stem	CCG	0.0013898	1451.67	0.00297619
EBT00001514671	ArgX	40	Ac-stem	CCG	G	G	0	363.333	0		EBT00051365344	Arg1	G	40	Ac-stem	CCG	0.00251185	1456	0.000228885
EBT00001514671	ArgX	41	Ac-stem	CCG	C	C	0.000944287	363.333	0.0135747		EBT00051365344	Arg1	C	41	Ac-stem	CCG	0.0016925	1456.33	0.00817253
EBT00001514671	ArgX	42	Ac-stem	CCG	A	A	0.000687285	368.333	0		EBT00051365344	Arg1	A	42	Ac-stem	CCG	0.00159442	1468.33	0
EBT00001514671	ArgX	43	Ac-stem	CCG	G	G	0.00269732	368.333	0.0107431		EBT00051365344	Arg1	G	43	Ac-stem	CCG	0.000962077	1409	0.0404086
EBT00001514671	ArgX	44	V-region	CCG	A	A	0.00158193	372.333	0.0278503		EBT00051365344	Arg1	G	44	V-region	CCG	0.00316643	1468.33	0.00676437
EBT00001514671	ArgX	45	V-region	CCG	G	G	0.00150947	383	0.000869565		EBT00051365344	Arg1	G	45	V-region	CCG	0.00143066	1478.33	0.00871703
EBT00001514671	ArgX	46	V-region	CCG	G	m7G	0	383.333	0.0650407		EBT00051365344	Arg1	G	46	V-region	CCG	0.00448419	1491.33	0.169482
EBT00001514671	ArgX	47	V-region	CCG	T	U	0.0240397	410	0.0136327		EBT00051365344	Arg1	T	47	V-region	CCG	0.0510494	1795.67	0.0702451
EBT00001514671	ArgX	48	V-region	CCG	C	C	0.000609385	415.667	0.00953137		EBT00051365344	Arg1	C	48	V-region	CCG	0.00104363	1931.33	0.0073668
EBT00001514671	ArgX	49	T-stem	CCG	T	U	0.00798851	419.667	0		EBT00051365344	Arg1	G	49	T-stem	CCG	0.00154044	1945.67	0.00273364
EBT00001514671	ArgX	50	T-stem	CCG	C	C	0.00640647	419.667	0.00631413		EBT00051365344	Arg1	T	50	T-stem	CCG	0.00615878	1951	0
EBT00001514671	ArgX	51	T-stem	CCG	A	A	0	422.333	0		EBT00051365344	Arg1	G	51	T-stem	CCG	0.00474758	1951	0.000341589
EBT00001514671	ArgX	52	T-stem	CCG	G	G	0.00138941	422.333	0		EBT00051365344	Arg1	G	52	T-stem	CCG	0.00186335	1951.67	0.00238541
EBT00001514671	ArgX	53	T-stem	CCG	G	G	0.000789889	422.333	0.0140078		EBT00051365344	Arg1	G	53	T-stem	CCG	0.00103186	1956.33	0.0122854
EBT00001514671	ArgX	54	T-loop	CCG	T	T	0	428.333	0		EBT00051365344	Arg1	T	54	T-loop	CCG	0.00102657	1980.67	0
EBT00001514671	ArgX	55	T-loop	CCG	T	Y	0.000775194	428.333	0		EBT00051365344	Arg1	T	55	T-loop	CCG	0.00169459	1980.67	0
EBT00001514671	ArgX	56	T-loop	CCG	C	C	0.000588928	428.333	0		EBT00051365344	Arg1	C	56	T-loop	CCG	0.00191631	1980.67	0
EBT00001514671	ArgX	57	T-loop	CCG	G	G	0	428.333	0		EBT00051365344	Arg1	G	57	T-loop	CCG	0.00167616	1980.67	0
EBT00001514671	ArgX	58	T-loop	CCG	A	A	0	428.333	0		EBT00051365344	Arg1	A	58	T-loop	CCG	0.000718649	1980.33	0.000168294
EBT00001514671	ArgX	59	T-loop	CCG	A	A	0.000588928	428.333	0		EBT00051365344	Arg1	A	59	T-loop	CCG	0.00145522	1980.67	0
EBT00001514671	ArgX	60	T-loop	CCG	T	U	0.00482433	428.333	0		EBT00051365344	Arg1	T	60	T-loop	CCG	0.00345851	1980.67	0
EBT00001514671	ArgX	61	T-stem	CCG	C	C	0.000775194	428.333	0		EBT00051365344	Arg1	C	61	T-stem	CCG	0.00613198	1980.33	0.000168294
EBT00001514671	ArgX	62	T-stem	CCG	C	C	0.00233126	428.333	0		EBT00051365344	Arg1	C	62	T-stem	CCG	0.00386794	1980.67	0
EBT00001514671	ArgX	63	T-stem	CCG	T	U	0.0069881	428.333	0		EBT00051365344	Arg1	C	63	T-stem	CCG	0.00357794	1980.67	0
EBT00001514671	ArgX	64	T-stem	CCG	G	G	0.00522131	428.333	0		EBT00051365344	Arg1	G	64	T-stem	CCG	0.00508507	1980.67	0
EBT00001514671	ArgX	65	T-stem	CCG	T	U	0.00621291	428.333	0		EBT00051365344	Arg1	C	65	T-stem	CCG	0.00183246	1980.67	0
EBT00001514671	ArgX	66	Acc-stem	CCG	C	C	0.00367093	428.333	0		EBT00051365344	Arg1	C	66	Acc-stem	CCG	0.00258746	1980.67	0
EBT00001514671	ArgX	67	Acc-stem	CCG	G	G	0.00737941	428.333	0		EBT00051365344	Arg1	G	67	Acc-stem	CCG	0.0064567	1980.67	0
EBT00001514671	ArgX	68	Acc-stem	CCG	G	G	0.00562398	428.333	0		EBT00051365344	Arg1	G	68	Acc-stem	CCG	0.00377993	1980.67	0
EBT00001514671	ArgX	69	Acc-stem	CCG	G	G	0.00155039	428.333	0		EBT00051365344	Arg1	A	69	Acc-stem	CCG	0.00239897	1980.67	0
EBT00001514671	ArgX	70	Acc-stem	CCG	C	C	0.00505382	428.333	0		EBT00051365344	Arg1	T	70	Acc-stem	CCG	0.0119167	1980.67	0
EBT00001514671	ArgX	71	Acc-stem	CCG	G	G	0.00233126	428.333	0		EBT00051365344	Arg1	G	71	Acc-stem	CCG	0.00749133	1980.67	0
EBT00001514671	ArgX	72	Acc-stem	CCG	C	C	0.00310645	428.333	0		EBT00051365344	Arg1	C	72	Acc-stem	CCG	0.00407539	1980.67	0
EBT00001514671	ArgX	73	0	CCG	G	G	0.00367093	428.333	0		EBT00051365344	Arg1	G	73	0	CCG	0.00633674	1980.33	0.000168294
EBT00001514671	ArgX	74	0	CCG	C	C	0.00310645	428.333	0		EBT00051365344	Arg1	C	74	0	CCG	0.00190126	1980.67	0
EBT00001514671	ArgX	75	0	CCG	C	C	0	428.333	0		EBT00051365344	Arg1	C	75	0	CCG	0	1781.33	0
EBT00001514671	ArgX	76	0	CCG	A	A	0	318.333	0		EBT00051365344	Arg1	A	76	0	CCG	0	1388.67	0
EBT00001514747	ArgW	1	Acc-stem	CCU	G	G	NA	40.3333	NA		EBT00051366603	Arg1	G	1	Acc-stem	CCU	NA	14.3333	NA
EBT00001514747	ArgW	2	Acc-stem	CCU	T	U	NA	40.3333	NA		EBT00051366603	Arg1	T	2	Acc-stem	CCU	NA	14.3333	NA
EBT00001514747	ArgW	3	Acc-stem	CCU	C	C	NA	40.6667	NA		EBT00051366603	Arg1	C	3	Acc-stem	CCU	NA	14.3333	NA
EBT00001514747	ArgW	4	Acc-stem	CCU	C	C	NA	40.6667	NA		EBT00051366603	Arg1	C	4	Acc-stem	CCU	NA	14.3333	NA
EBT00001514747	ArgW	5	Acc-stem	CCU	T	U	NA	51.3333	NA		EBT00051366603	Arg1	C	5	Acc-stem	CCU	NA	14.3333	NA
EBT00001514747	ArgW	6	Acc-stem	CCU	C	C	NA	51.3333	NA		EBT00051366603	Arg1	G	6	Acc-stem	CCU	NA	14.3333	NA
EBT00001514747	ArgW	7	Acc-stem	CCU	T	U	NA	51.6667	NA		EBT00051366603	Arg1	G	7	Acc-stem	CCU	NA	14.3333	NA
EBT00001514747	ArgW	8	0	CCU	T	U	NA	51.6667	NA		EBT00051366603	Arg1	T	8	0	CCU	NA	14.3333	NA
EBT00001514747	ArgW	9	0	CCU	A	A	NA	51.6667	NA		EBT00051366603	Arg1	A	9	0	CCU	NA	14.3333	NA
EBT00001514747	ArgW	10	D-stem	CCU	G	G	NA	51.6667	NA		EBT00051366603	Arg1	G	10	D-stem	CCU	NA	14.3333	NA
EBT00001514747	ArgW	11	D-stem	CCU	T	U	NA	51.6667	NA		EBT00051366603	Arg1	C	11	D-stem	CCU	NA	14.3333	NA
EBT00001514747	ArgW	12	D-stem	CCU	T	U	NA	51.6667	NA		EBT00051366603	Arg1	T	12	D-stem	CCU	NA	14.3333	NA
EBT00001514747	ArgW	13	D-stem	CCU	A	A	NA	51.6667	NA		EBT00051366603	Arg1	C	13	D-stem	CCU	NA	14.3333	NA
EBT00001514747	ArgW	14	D-loop	CCU	A	A	NA	51.6667	NA		EBT00051366603	Arg1	A	14	D-loop	CCU	NA	21.3333	NA
EBT00001514747	ArgW	15	D-loop	CCU	A	A	NA	51.6667	NA		EBT00051366603	Arg1	A	15	D-loop	CCU	NA	38.3333	NA
EBT00001514747	ArgW	16	D-loop	CCU	T	U	NA	51.6667	NA		EBT00051366603	Arg1	T	16	D-loop	CCU	NA	47.6667	NA
EBT00001514747		NA	NA	NA	NA	NA	NA	NA	NA		EBT00051366603	Arg1	T	17	D-loop	CCT	NA	48.3333	NA
EBT00001514747	ArgW	18	D-loop	CCU	G	G	NA	51.6667	NA		EBT00051366603	Arg1	G	18	D-loop	CCU	NA	48.6667	NA
EBT00001514747	ArgW	19	D-loop	CCU	G	G	NA	51.6667	NA		EBT00051366603	Arg1	G	19	D-loop	CCU	NA	48.6667	NA
EBT00001514747	ArgW	20	D-loop	CCU	A	A	NA	59.3333	NA		EBT00051366603	Arg1	A	20	D-loop	CCU	NA	57.6667	NA
EBT00001514747	ArgW	20a	D-loop	CCU	T	U	NA	59.3333	NA		EBT00051366603	Arg1	T	20a	D-loop	CCU	NA	68	NA
EBT00001514747	ArgW	21	D-loop	CCU	A	A	NA	59.3333	NA		EBT00051366603	Arg1	A	21	D-loop	CCU	NA	68	NA
EBT00001514747	ArgW	22	D-stem	CCU	T	U	NA	59.3333	NA		EBT00051366603	Arg1	G	22	D-stem	CCU	NA	69	NA
EBT00001514747	ArgW	23	D-stem	CCU	A	A	NA	59.3333	NA		EBT00051366603	Arg1	A	23	D-stem	CCU	NA	69	NA
EBT00001514747	ArgW	24	D-stem	CCU	A	A	NA	59.3333	NA		EBT00051366603	Arg1	G	24	D-stem	CCU	NA	69	NA
EBT00001514747	ArgW	25	D-stem	CCU	C	C	NA	64	NA		EBT00051366603	Arg1	C	25	D-stem	CCU	NA	72.3333	NA
EBT00001514747	ArgW	26	0	CCU	G	G	NA	69.3333	NA		EBT00051366603	Arg1	A	26	0	CCU	NA	72.3333	NA
EBT00001514747	ArgW	27	Ac-stem	CCU	A	A	NA	69.3333	NA		EBT00051366603	Arg1	T	27	Ac-stem	CCU	NA	78	NA
EBT00001514747	ArgW	28	Ac-stem	CCU	G	G	NA	69.3333	NA		EBT00051366603	Arg1	C	28	Ac-stem	CCU	NA	93.3333	NA
EBT00001514747	ArgW	29	Ac-stem	CCU	C	C	NA	69.3333	NA		EBT00051366603	Arg1	C	29	Ac-stem	CCU	NA	93.3333	NA
EBT00001514747	ArgW	30	Ac-stem	CCU	C	C	NA	69.3333	NA		EBT00051366603	Arg1	C	30	Ac-stem	CCU	NA	93.3333	NA
EBT00001514747	ArgW	31	Ac-stem	CCU	C	C	NA	67.6667	NA		EBT00051366603	Arg1	C	31	Ac-stem	CCU	NA	93.3333	NA
EBT00001514747	ArgW	32	Ac-loop	CCU	C	C	NA	67.6667	NA		EBT00051366603	Arg1	C	32	Ac-loop	CCU	NA	84.6667	NA
EBT00001514747	ArgW	33	Ac-loop	CCU	T	U	NA	75	NA		EBT00051366603	Arg1	T	33	Ac-loop	CCU	0.337382	103.333	0.0801187
EBT00001514747	ArgW	34	Ac-loop	CCU	C	C	NA	82.6667	NA		EBT00051366603	Arg1	C	34	Ac-loop	CCU	0	112.333	0
EBT00001514747	ArgW	35	Ac-loop	CCU	C	C	NA	93.3333	NA		EBT00051366603	Arg1	C	35	Ac-loop	CCU	0.00134409	112.333	0.216279
EBT00001514747	ArgW	36	Ac-loop	CCU	T	U	0	266.667	0.16318		EBT00051366603	Arg1	T	36	Ac-loop	CCU	0.00108932	143.333	0.0652174
EBT00001514747	ArgW	37	Ac-loop	CCU	A	A	0	318.667	0.779724		EBT00051366603	Arg1	A	37	Ac-loop	CCU	0	153.333	0.398693
EBT00001514747	ArgW	38	Ac-loop	CCU	A	A	0.00658455	1446.67	0.431044		EBT00051366603	Arg1	A	38	Ac-loop	CCU	0.000757576	255	0.551583
EBT00001514747	ArgW	39	Ac-stem	CCU	G	G	0.00025441	2542.67	0.0165034		EBT00051366603	Arg1	G	39	Ac-stem	CCU	0.00045977	568.667	0.0167147
EBT00001514747	ArgW	40	Ac-stem	CCU	G	G	0.00109888	2585.33	0.0010304		EBT00051366603	Arg1	G	40	Ac-stem	CCU	0.00154493	578.333	0.00800457
EBT00001514747	ArgW	41	Ac-stem	CCU	G	G	0.0014329	2588	0.00538048		EBT00051366603	Arg1	G	41	Ac-stem	CCU	0.00114987	583	0.0118644
EBT00001514747	ArgW	42	Ac-stem	CCU	C	C	0.00325555	2602	0.0125237		EBT00051366603	Arg1	G	42	Ac-stem	CCU	0.000877193	590	0.00729108
EBT00001514747	ArgW	43	Ac-stem	CCU	T	U	0.00211495	2635	0.00277532		EBT00051366603	Arg1	A	43	Ac-stem	CCU	0.00253031	594.333	0.0149171
EBT00001514747	ArgW	44	V-region	CCU	A	A	0.00114588	2642.33	0.00414573		EBT00051366603	Arg1	A	44	V-region	CCU	0.000877193	603.333	0
EBT00001514747	ArgW	46	V-region	CCU	A	A	0.000341501	2653.33	0.00834683		EBT00051366603	Arg1	G	45	V-region	CCU	0.0010491	603.333	0
EBT00001514747		NA	NA	NA	NA	NA	NA	NA	NA		EBT00051366603	Arg1	G	46	V-region	CCT	0.00495255	603.333	0.117073
EBT00001514747	ArgW	47	V-region	CCU	T	U	0.00507636	2675.67	0.00161692		EBT00051366603	Arg1	T	47	V-region	CCU	0.00725875	683.333	0.0106178
EBT00001514747	ArgW	48	V-region	CCU	T	U	0.00797786	2680	0.000497265		EBT00051366603	Arg1	T	48	V-region	CCU	0.00325115	690.667	0
EBT00001514747	ArgW	49	T-stem	CCU	G	G	0.00253608	2681.33	0.00037281		EBT00051366603	Arg1	G	49	T-stem	CCU	0.00466658	690.667	0
EBT00001514747	ArgW	50	T-stem	CCU	C	C	0.00330558	2682.33	0.000869134		EBT00051366603	Arg1	G	50	T-stem	CCU	0.00240482	690.667	0
EBT00001514747	ArgW	51	T-stem	CCU	A	A	0.000676436	2684.67	0		EBT00051366603	Arg1	A	51	T-stem	CCU	0	690.667	0
EBT00001514747	ArgW	52	T-stem	CCU	G	G	0.00250593	2684.67	0.000620424		EBT00051366603	Arg1	G	52	T-stem	CCU	0.00261001	690.667	0.003367
EBT00001514747	ArgW	53	T-stem	CCU	G	G	0.00195731	2686.33	0.00235207		EBT00051366603	Arg1	G	53	T-stem	CCU	0.00111365	693	0.00858369
EBT00001514747	ArgW	54	T-loop	CCU	T	U	0.00121573	2692.67	0		EBT00051366603	Arg1	T	54	T-loop	CCU	0.00277548	699	0
EBT00001514747	ArgW	55	T-loop	CCU	T	U	0.000558289	2692.67	0		EBT00051366603	Arg1	T	55	T-loop	CCU	0	699	0
EBT00001514747	ArgW	56	T-loop	CCU	C	C	0.000153046	2692.67	0		EBT00051366603	Arg1	C	56	T-loop	CCU	0.000749906	699	0
EBT00001514747	ArgW	57	T-loop	CCU	G	G	0.000153046	2692.67	0		EBT00051366603	Arg1	G	57	T-loop	CCU	0.000374953	699	0
EBT00001514747	ArgW	58	T-loop	CCU	A	A	0	2692.67	0		EBT00051366603	Arg1	A	58	T-loop	CCU	0.00243711	699	0
EBT00001514747	ArgW	59	T-loop	CCU	T	U	0.00195862	2692.67	0		EBT00051366603	Arg1	C	59	T-loop	CCU	0.00058072	699	0
EBT00001514747	ArgW	60	T-loop	CCU	T	U	0.00276911	2692.67	0		EBT00051366603	Arg1	C	60	T-loop	CCU	0.00350701	699	0
EBT00001514747	ArgW	61	T-stem	CCU	C	C	0.00283671	2692.67	0		EBT00051366603	Arg1	C	61	T-stem	CCU	0.00573835	699	0
EBT00001514747	ArgW	62	T-stem	CCU	C	C	0.00189102	2692.67	0		EBT00051366603	Arg1	C	62	T-stem	CCU	0.00374953	699	0
EBT00001514747	ArgW	63	T-stem	CCU	T	U	0.00253891	2692.67	0		EBT00051366603	Arg1	T	63	T-stem	CCU	0.00388196	699	0
EBT00001514747	ArgW	64	T-stem	CCU	G	G	0.00290304	2692.67	0		EBT00051366603	Arg1	C	64	T-stem	CCU	0.000374953	699	0
EBT00001514747	ArgW	65	T-stem	CCU	C	C	0.00347918	2692.67	0		EBT00051366603	Arg1	T	65	T-stem	CCU	0.00832627	699	0
EBT00001514747	ArgW	66	Acc-stem	CCU	A	A	0.000904228	2692.67	0		EBT00051366603	Arg1	C	66	Acc-stem	CCU	0.00676719	699	0
EBT00001514747	ArgW	67	Acc-stem	CCU	G	G	0.00538151	2691.33	0.000495172		EBT00051366603	Arg1	C	67	Acc-stem	CCU	0.00466845	699	0
EBT00001514747	ArgW	68	Acc-stem	CCU	G	G	0.00440701	2692.67	0		EBT00051366603	Arg1	G	68	Acc-stem	CCU	0.00601745	699	0
EBT00001514747	ArgW	69	Acc-stem	CCU	G	G	0.00311954	2692.67	0		EBT00051366603	Arg1	G	69	Acc-stem	CCU	0.00865041	699	0
EBT00001514747	ArgW	70	Acc-stem	CCU	G	G	0.00107098	2692.67	0		EBT00051366603	Arg1	G	70	Acc-stem	CCU	0.00448106	699	0
EBT00001514747	ArgW	71	Acc-stem	CCU	A	A	0.00298434	2692.67	0		EBT00051366603	Arg1	A	71	Acc-stem	CCU	0.00742124	699	0
EBT00001514747	ArgW	72	Acc-stem	CCU	C	C	0.0012203	2692	0.000247586		EBT00051366603	Arg1	C	72	Acc-stem	CCU	0.00328287	699	0
EBT00001514747	ArgW	73	0	CCU	A	A	0.00439009	2692.67	0		EBT00051366603	Arg1	G	73	0	CCU	0.00149981	699	0
EBT00001514747	ArgW	74	0	CCU	C	C	0.00104919	2692.33	0		EBT00051366603	Arg1	C	74	0	CCU	0.00180143	699	0
EBT00001514747	ArgW	75	0	CCU	C	C	0	2692.33	0		EBT00051366603	Arg1	C	75	0	CCU	0	588.667	0
EBT00001514747	ArgW	76	0	CCU	A	A	0	2074	0		EBT00051366603	Arg1	A	76	0	CCU	0	478.333	0
EBT00001514584	SerU	1	Acc-stem	CGA	G	G	NA	14	NA		EBT00051364934	Ser1	G	1	Acc-stem	CGA	0	119.667	0.0137363
EBT00001514584	SerU	2	Acc-stem	CGA	G	G	NA	14	NA		EBT00051364934	Ser1	G	2	Acc-stem	CGA	0	121.333	0.00273973
EBT00001514584	SerU	3	Acc-stem	CGA	A	A	NA	14.3333	NA		EBT00051364934	Ser1	A	3	Acc-stem	CGA	0.00208333	121.667	0
EBT00001514584	SerU	4	Acc-stem	CGA	G	G	NA	14.3333	NA		EBT00051364934	Ser1	G	4	Acc-stem	CGA	0	121.667	0
EBT00001514584	SerU	5	Acc-stem	CGA	A	A	NA	14.3333	NA		EBT00051364934	Ser1	A	5	Acc-stem	CGA	0.00294985	121.667	0
EBT00001514584	SerU	6	Acc-stem	CGA	G	G	NA	14.3333	NA		EBT00051364934	Ser1	G	6	Acc-stem	CGA	0	121.667	0
EBT00001514584	SerU	7	Acc-stem	CGA	A	A	NA	14.3333	NA		EBT00051364934	Ser1	A	7	Acc-stem	CGA	0.00208333	121.667	0
EBT00001514584	SerU	8	0	CGA	T	U	NA	14.3333	NA		EBT00051364934	Ser1	T	8	0	CGA	0.0433813	121.667	0
EBT00001514584	SerU	9	0	CGA	G	G	NA	14.3333	NA		EBT00051364934	Ser1	G	9	0	CGA	0	121.667	0.0592784
EBT00001514584	SerU	10	D-stem	CGA	C	C	NA	14.3333	NA		EBT00051364934	Ser1	C	10	D-stem	CGA	0.00661765	129.333	0
EBT00001514584	SerU	11	D-stem	CGA	C	C	NA	14.3333	NA		EBT00051364934	Ser1	C	11	D-stem	CGA	0.0126918	129.333	0
EBT00001514584	SerU	12	D-stem	CGA	G	G	NA	14.3333	NA		EBT00051364934	Ser1	G	12	D-stem	CGA	0	129.333	0
EBT00001514584	SerU	13	D-stem	CGA	G	G	NA	14.3333	NA		EBT00051364934	Ser1	G	13	D-stem	CGA	0.00362319	129.333	0
EBT00001514584	SerU	14	D-loop	CGA	A	A	NA	14.3333	NA		EBT00051364934	Ser1	A	14	D-loop	CGA	0	129.333	0
EBT00001514584	SerU	15	D-loop	CGA	G	G	NA	14.3333	NA		EBT00051364934	Ser1	G	15	D-loop	CGA	0.00208333	129.333	0
EBT00001514584	SerU	16	D-loop	CGA	C	C	NA	14.3333	NA		EBT00051364934	Ser1	T	16	D-loop	CGA	0.00416667	129.333	0
EBT00001514584	SerU	18	D-loop	CGA	G	Gm	NA	14.3333	NA		EBT00051364934	Ser1	G	18	D-loop	CGA	0.00208333	129.333	0
EBT00001514584	SerU	19	D-loop	CGA	G	G	NA	14.3333	NA		EBT00051364934	Ser1	G	19	D-loop	CGA	0.00778986	129.333	0.00257069
EBT00001514584	SerU	20	D-loop	CGA	C	C	NA	14.3333	NA		EBT00051364934	Ser1	T	20	D-loop	CGA	0.00868309	129.667	0
EBT00001514584	SerU	20a	D-loop	CGA	T	D	NA	14.3333	NA		EBT00051364934	Ser1	C	20a	D-loop	CGA	0	129.667	0
EBT00001514584	SerU	20b	D-loop	CGA	G	G	NA	14.3333	NA		EBT00051364934	Ser1	G	20b	D-loop	CGA	0	129.667	0
EBT00001514584	SerU	21	D-loop	CGA	A	A	NA	14.3333	NA		EBT00051364934	Ser1	A	21	D-loop	CGA	0	129.667	0
EBT00001514584	SerU	22	D-stem	CGA	A	A	NA	14.3333	NA		EBT00051364934	Ser1	A	22	D-stem	CGA	0.00208333	129.667	0.11991
EBT00001514584	SerU	23	D-stem	CGA	C	C	NA	14.3333	NA		EBT00051364934	Ser1	C	23	D-stem	CGA	0.00175439	147.333	0
EBT00001514584	SerU	24	D-stem	CGA	G	G	NA	14.3333	NA		EBT00051364934	Ser1	G	24	D-stem	CGA	0	147.333	0
EBT00001514584	SerU	25	D-stem	CGA	G	G	NA	14.3333	NA		EBT00051364934	Ser1	G	25	D-stem	CGA	0.00778986	147.333	0
EBT00001514584	SerU	26	0	CGA	A	A	NA	14.3333	NA		EBT00051364934	Ser1	G	26	0	CGA	0.00208333	147.333	0
EBT00001514584	SerU	27	Ac-Stem	CGA	C	C	NA	14.3333	NA		EBT00051364934	Ser1	A	27	Ac-stem	CGA	0	147.333	0
EBT00001514584	SerU	28	Ac-Stem	CGA	C	C	NA	14.3333	NA		EBT00051364934	Ser1	C	28	Ac-stem	CGA	0	147.333	0
EBT00001514584	SerU	29	Ac-Stem	CGA	G	G	NA	14.3333	NA		EBT00051364934	Ser1	G	29	Ac-stem	CGA	0.00208333	147.333	0
EBT00001514584	SerU	30	Ac-Stem	CGA	G	G	NA	14.3333	NA		EBT00051364934	Ser1	G	30	Ac-stem	CGA	0.00175439	147.333	0.0307018
EBT00001514584	SerU	31	Ac-Stem	CGA	T	U	NA	14.3333	NA		EBT00051364934	Ser1	A	31	Ac-stem	CGA	0	152	0
EBT00001514584	SerU	32	Ac-loop	CGA	C	C	NA	14.3333	NA		EBT00051364934	Ser1	T	32	Ac-loop	CGA	0.00371732	152	0
EBT00001514584	SerU	33	Ac-loop	CGA	T	U	NA	14.3333	NA		EBT00051364934	Ser1	T	33	Ac-loop	CGA	0	152	0
EBT00001514584	SerU	34	Ac-loop	CGA	C	C	NA	14.3333	NA		EBT00051364934	Ser1	C	34	Ac-loop	CGA	0	152	0
EBT00001514584	SerU	35	Ac-loop	CGA	G	G	NA	14.6667	NA		EBT00051364934	Ser1	G	35	Ac-loop	CGA	0	152	0.0988142
EBT00001514584	SerU	36	Ac-loop	CGA	A	A	NA	17.3333	NA		EBT00051364934	Ser1	A	36	Ac-loop	CGA	0	168.667	0
EBT00001514584	SerU	37	Ac-loop	CGA	A	ms2i6A	NA	17.3333	NA		EBT00051364934	Ser1	A	37	Ac-loop	CGA	0	168.667	0.160862
EBT00001514584	SerU	38	Ac-loop	CGA	A	A	NA	30.6667	NA		EBT00051364934	Ser1	A	38	Ac-loop	CGA	0.00291082	201	0.120991
EBT00001514584	SerU	39	Ac-stem	CGA	A	A	NA	91.6667	NA		EBT00051364934	Ser1	T	39	Ac-stem	CGA	0.000983284	228.667	0
EBT00001514584	SerU	40	Ac-stem	CGA	C	C	0	101.667	0		EBT00051364934	Ser1	C	40	Ac-stem	CGA	0.00315956	228.667	0.00867052
EBT00001514584	SerU	41	Ac-stem	CGA	C	C	0.00225225	101.667	0		EBT00051364934	Ser1	C	41	Ac-stem	CGA	0.0046083	230.667	0
EBT00001514584	SerU	42	Ac-stem	CGA	G	G	0	101.667	0		EBT00051364934	Ser1	G	42	Ac-stem	CGA	0.0015361	230.667	0.046832
EBT00001514584	SerU	43	Ac-stem	CGA	G	G	0	101.667	0.052795		EBT00051364934	Ser1	T	43	Ac-stem	CGA	0.0139884	242	0
EBT00001514584	SerU	44	V-region	CGA	A	A	0	107.333	0		EBT00051364934	Ser1	T	44	0	CGA	0.00740941	242	0.00547945
EBT00001514584	SerU	V1	V-region	CGA	G	G	0	107.333	0		EBT00051364934	Ser1	G	V1	V-region	CGA	0.0212373	243.333	0
EBT00001514584	SerU	V2	V-region	CGA	T	U	0.00275482	107.333	0		EBT00051364934	Ser1	A	V2	V-region	CGA	0	243.333	0
EBT00001514584	SerU	V3	V-region	CGA	A	A	0	107.333	0		EBT00051364934	Ser1	G	V3	V-region	CGA	0.00430618	243.333	0.0174966
EBT00001514584	SerU	V4	V-region	CGA	G	G	0	107.333	0		EBT00051364934	Ser1	T	V4	V-region	CGA	0.00369344	247.667	0
EBT00001514584	SerU	V5	V-region	CGA	G	G	0.0045045	107.333	0		EBT00051364934	Ser1	C	V5	V-region	CGA	0.0030722	247.667	0.0171958
EBT00001514584	SerU	V6	V-region	CGA	G	G	0.00500707	107.333	0		EBT00051364934	Ser1	A	V6	V-region	CGA	0.00294356	252	0
EBT00001514584	SerU	V8	V-region	CGA	G	G	0.00225225	107.333	0.0212766		EBT00051364934	Ser1	G	V8	V-region	CGA	0.000923361	252	0.0257732
EBT00001514584	SerU	V9	V-region	CGA	C	C	0	109.667	0		EBT00051364934	Ser1	C	V9	V-region	CGA	0.00132802	258.667	0.0407911
EBT00001514584	SerU	V10	V-region	CGA	A	A	0	109.667	0		EBT00051364934	Ser1	A	V10	V-region	CGA	0.0008726	269.667	0.0170109
EBT00001514584	SerU	V11	V-region	CGA	A	A	0.00275482	109.667	0		EBT00051364934	Ser1	A	V11	V-region	CGA	0	274.333	0
EBT00001514584	SerU	V14	V-region	CGA	C	C	0	109.667	0.0208333		EBT00051364934	Ser1	T	V14	V-region	CGA	0.00302234	274.333	0
EBT00001514584	SerU	V15	V-region	CGA	T	U	0.00275482	112	0		EBT00051364934	Ser1	G	V15	V-region	CGA	0.0136865	274.333	0
EBT00001514584	SerU	V16	V-region	CGA	C	C	0.00770609	112	0		EBT00051364934	Ser1	G	V16	V-region	CGA	0.00625798	274.333	0
EBT00001514584	SerU	V17	V-region	CGA	T	U	0.00770609	112	0		EBT00051364934	Ser1	C	V17	V-region	CGA	0.00400159	274.333	0.0202381
EBT00001514584	SerU	V18	V-region	CGA	A	A	0	112	0		EBT00051364934	Ser1	T	V18	V-region	CGA	0.00170068	280	0
EBT00001514584	SerU	V19	V-region	CGA	C	C	0.00275482	112	0		EBT00051364934	Ser1	C	V19	V-region	CGA	0.00689043	280	0.0300231
EBT00001514584	SerU	48	V-region	CGA	C	C	0.00985663	112	0		EBT00051364934	Ser1	C	48	V-region	CGA	0.00242131	288.667	0.0941423
EBT00001514584	SerU	49	T-stem	CGA	G	G	0.0021645	111.333	0.00595238		EBT00051364934	Ser1	T	49	T-stem	CGA	0.00254217	318.667	0.00520291
EBT00001514584	SerU	50	T-stem	CGA	G	G	0.00860215	112	0		EBT00051364934	Ser1	A	50	T-stem	CGA	0	320.333	0
EBT00001514584	SerU	51	T-stem	CGA	G	G	0.00766018	112	0		EBT00051364934	Ser1	G	51	T-stem	CGA	0.00639304	320.333	0
EBT00001514584	SerU	52	T-stem	CGA	G	G	0.00490536	112	0		EBT00051364934	Ser1	G	52	T-stem	CGA	0.0104531	320.333	0
EBT00001514584	SerU	53	T-stem	CGA	G	G	0	112	0		EBT00051364934	Ser1	G	53	T-stem	CGA	0.00542923	320.333	0
EBT00001514584	SerU	54	T-loop	CGA	T	T	0.00430107	112	0		EBT00051364934	Ser1	T	54	T-loop	CGA	0.0122276	320.333	0
EBT00001514584	SerU	55	T-loop	CGA	T	Y	0.00490536	112	0		EBT00051364934	Ser1	T	55	T-loop	CGA	0.00854358	320.333	0
EBT00001514584	SerU	56	T-loop	CGA	C	C	0	112	0		EBT00051364934	Ser1	C	56	T-loop	CGA	0.00290264	320.333	0
EBT00001514584	SerU	57	T-loop	CGA	A	A	0.00275482	112	0		EBT00051364934	Ser1	A	57	T-loop	CGA	0.00215054	320.333	0
EBT00001514584	SerU	58	T-loop	CGA	A	A	0.00215054	112	0		EBT00051364934	Ser1	A	58	T-loop	CGA	0.00614607	320.333	0
EBT00001514584	SerU	59	T-loop	CGA	A	A	0	112	0		EBT00051364934	Ser1	A	59	T-loop	CGA	0.00290264	320.333	0
EBT00001514584	SerU	60	T-loop	CGA	T	U	0.00215054	112	0		EBT00051364934	Ser1	T	60	T-loop	CGA	0.0114169	320.333	0
EBT00001514584	SerU	61	T-stem	CGA	C	C	0.00491932	111.667	0.00297619		EBT00051364934	Ser1	C	61	T-stem	CGA	0.00614607	320.333	0
EBT00001514584	SerU	62	T-stem	CGA	C	C	0.00215054	112	0		EBT00051364934	Ser1	C	62	T-stem	CGA	0.0126389	320.333	0
EBT00001514584	SerU	63	T-stem	CGA	C	C	0.00215054	112	0		EBT00051364934	Ser1	C	63	T-stem	CGA	0.00290264	320.333	0
EBT00001514584	SerU	64	T-stem	CGA	C	C	0	112	0		EBT00051364934	Ser1	T	64	T-stem	CGA	0.00355494	320.333	0
EBT00001514584	SerU	65	T-stem	CGA	C	C	0.00490536	112	0		EBT00051364934	Ser1	A	65	T-stem	CGA	0.00180974	320.333	0
EBT00001514584	SerU	66	Acc-stem	CGA	T	U	0.00770609	112	0		EBT00051364934	Ser1	T	66	Acc-stem	CGA	0.0127508	320.333	0
EBT00001514584	SerU	67	Acc-stem	CGA	C	C	0	112	0		EBT00051364934	Ser1	C	67	Acc-stem	CGA	0.0028381	320.333	0
EBT00001514584	SerU	68	Acc-stem	CGA	T	U	0.00215054	112	0		EBT00051364934	Ser1	T	68	Acc-stem	CGA	0.00611678	320.333	0
EBT00001514584	SerU	69	Acc-stem	CGA	C	C	0.01382	112	0		EBT00051364934	Ser1	C	69	Acc-stem	CGA	0	320.333	0
EBT00001514584	SerU	70	Acc-stem	CGA	T	U	0.0104609	112	0		EBT00051364934	Ser1	T	70	Acc-stem	CGA	0.00683363	320.333	0
EBT00001514584	SerU	71	Acc-stem	CGA	C	C	0.00766018	112	0		EBT00051364934	Ser1	C	71	Acc-stem	CGA	0.00891963	320.333	0
EBT00001514584	SerU	72	Acc-stem	CGA	C	C	0.00920643	112	0		EBT00051364934	Ser1	C	72	Acc-stem	CGA	0.00864337	320.333	0
EBT00001514584	SerU	73	0	CGA	G	G	0.00770609	112	0		EBT00051364934	Ser1	G	73	0	CGA	0.00246205	320.333	0
EBT00001514584	SerU	74	0	CGA	C	C	0.00555556	112	0		EBT00051364934	Ser1	C	74	0	CGA	0.00290264	320.333	0
EBT00001514584	SerU	75	0	CGA	C	C	0	112	0		EBT00051364934	Ser1	C	75	0	CGA	0	275.333	0
EBT00001514584	SerU	76	0	CGA	A	A	NA	98.6667	NA		EBT00051364934	Ser1	A	76	0	CGA	0	239	0
EBT00001514637	ProK	1	Acc-stem	CGG	C	C	0	205	0.00324149		EBT00051368550	Pro1	C	1	Acc-stem	CGG	0	1434.33	0.0112592
EBT00001514637	ProK	2	Acc-stem	CGG	G	G	0	205.667	0.00161812		EBT00051368550	Pro1	G	2	Acc-stem	CGG	0	1450.67	0.000688863
EBT00001514637	ProK	3	Acc-stem	CGG	G	G	0.00160256	206	0.00161551		EBT00051368550	Pro1	G	3	Acc-stem	CGG	0.000582751	1451.67	0.00638832
EBT00001514637	ProK	4	Acc-stem	CGG	T	U	0.00438034	206.333	0		EBT00051368550	Pro1	A	4	Acc-stem	CGG	0.0008289	1461	0
EBT00001514637	ProK	5	Acc-stem	CGG	G	G	0.00194932	206.333	0		EBT00051368550	Pro1	G	5	Acc-stem	CGG	0.000677375	1461	0
EBT00001514637	ProK	6	Acc-stem	CGG	A	A	0.00389864	206.333	0.00642055		EBT00051368550	Pro1	C	6	Acc-stem	CGG	0.00197308	1461	0
EBT00001514637	ProK	7	Acc-stem	CGG	T	U	0.00320513	207.667	0		EBT00051368550	Pro1	G	7	Acc-stem	CGG	0.000634763	1461	0.00499432
EBT00001514637	ProK	8	0	CGG	T	s4U	0.0212746	207.667	0.0126783		EBT00051368550	Pro1	T	8	0	CGG	0.133663	1468.33	0.00271678
EBT00001514637	ProK	9	0	CGG	G	G	0.00739116	210.333	0		EBT00051368550	Pro1	A	9	0	CGG	0.000440626	1472.33	0
EBT00001514637	ProK	10	D-stem	CGG	G	G	0.00640186	210.333	0.0156006		EBT00051368550	Pro1	G	10	D-stem	CGG	0.0114273	1472.33	0
EBT00001514637	ProK	11	D-stem	CGG	C	C	0.00571109	213.667	0		EBT00051368550	Pro1	C	11	D-stem	CGG	0.0017803	1472.33	0
EBT00001514637	ProK	12	D-stem	CGG	G	G	0.00902839	213.667	0		EBT00051368550	Pro1	G	12	D-stem	CGG	0.00231256	1472.33	0.0058519
EBT00001514637	ProK	13	D-stem	CGG	C	C	0.0174837	213.667	0.00927357		EBT00051368550	Pro1	C	13	D-stem	CGG	0.00129247	1481	0
EBT00001514637	ProK	14	D-loop	CGG	A	A	0	215.667	0		EBT00051368550	Pro1	A	14	D-loop	CGG	0.000375164	1481	0
EBT00001514637	ProK	15	D-loop	CGG	G	G	0.00548022	215.667	0		EBT00051368550	Pro1	G	15	D-loop	CGG	0.000729727	1481	0.00604027
EBT00001514637	ProK	16	D-loop	CGG	C	C	0.00473879	215.667	0		EBT00051368550	Pro1	C	16	D-loop	CGG	0.000664265	1490	0.0541684
EBT00001514637	ProK	17	D-loop	CGG	C	C	0.00131234	215.667	0		EBT00051368550	Pro1	T	17	D-loop	CGG	0.00180625	1575.33	0
EBT00001514637	ProK	17a	D-loop	CGG	T	U	0.0117622	215.667	0		EBT00051368550	Pro1	T	17a	D-loop	CGG	0.00337958	1575.33	0
EBT00001514637	ProK	18	D-loop	CGG	G	G	0.00901582	215.667	0.0314371		EBT00051368550	Pro1	G	18	D-loop	CGG	0.00235225	1575.33	0.000423012
EBT00001514637	ProK	19	D-loop	CGG	G	G	0	222.667	0.0747922		EBT00051368550	Pro1	G	19	D-loop	CGG	0.00458333	1576	0.0305516
EBT00001514637	ProK	20	D-loop	CGG	T	D	0.0187506	240.667	0.00138313		EBT00051368550	Pro1	T	20	D-loop	CGG	0.00209316	1625.67	0.00428746
EBT00001514637	ProK	21	D-loop	CGG	A	A	0.00276123	241	0		EBT00051368550	Pro1	A	21	D-loop	CGG	0.000470052	1632.67	0
EBT00001514637	ProK	22	D-stem	CGG	G	G	0.00701655	241	0.0109439		EBT00051368550	Pro1	G	22	D-stem	CGG	0.00107517	1632.67	0.00850202
EBT00001514637	ProK	23	D-stem	CGG	C	C	0.00404025	243.667	0		EBT00051368550	Pro1	C	23	D-stem	CGG	0.00174667	1646.67	0
EBT00001514637	ProK	24	D-stem	CGG	G	G	0.00655062	243.667	0		EBT00051368550	Pro1	G	24	D-stem	CGG	0.00130668	1646.67	0
EBT00001514637	ProK	25	D-stem	CGG	C	C	0	243.667	0		EBT00051368550	Pro1	C	25	D-stem	CGG	0.00288565	1646.67	0
EBT00001514637	ProK	26	0	CGG	A	A	0.00502855	243.667	0		EBT00051368550	Pro1	G	26	0	CGG	0.00116256	1646.67	0.00503525
EBT00001514637	ProK	27	Ac-Stem	CGG	C	C	0	243.667	0.0201072		EBT00051368550	Pro1	T	27	Ac-stem	CGG	0.0018805	1655	0
EBT00001514637	ProK	28	Ac-Stem	CGG	T	U	0.00844101	248.667	0		EBT00051368550	Pro1	C	28	Ac-stem	CGG	0.000465802	1655	0
EBT00001514637	ProK	29	Ac-Stem	CGG	T	U	0.00435895	248.667	0		EBT00051368550	Pro1	T	29	Ac-stem	CGG	0.0016723	1655	0
EBT00001514637	ProK	30	Ac-Stem	CGG	C	C	0	248.667	0		EBT00051368550	Pro1	C	30	Ac-stem	CGG	0.00215539	1655	0
EBT00001514637	ProK	31	Ac-Stem	CGG	G	G	0.00370155	248.667	0.203842		EBT00051368550	Pro1	G	31	Ac-stem	CGG	0.0015735	1655	0.0633843
EBT00001514637	ProK	32	Ac-loop	CGG	T	Um	0.0451758	312.333	0.100768		EBT00051368550	Pro1	T	32	Ac-loop	CGG	0.00432598	1767	0
EBT00001514637	ProK	33	Ac-loop	CGG	T	U	0.022485	347.333	0		EBT00051368550	Pro1	T	33	Ac-loop	CGG	0.0129132	1755.67	0
EBT00001514637	ProK	34	Ac-loop	CGG	C	C	0.00311527	345.333	0		EBT00051368550	Pro1	C	34	Ac-loop	CGG	0.000804643	1754	0
EBT00001514637	ProK	35	Ac-loop	CGG	G	G	0.0728758	256	0.325132		EBT00051368550	Pro1	G	35	Ac-loop	CGG	0.00376048	1233	0.239045
EBT00001514637	ProK	36	Ac-loop	CGG	G	G	0.0264182	379.333	0.0732899		EBT00051368550	Pro1	G	36	Ac-loop	CGG	0.00107005	1620.33	0.00836393
EBT00001514637	ProK	37	Ac-loop	CGG	G	m1G	0.494729	409.333	0.882925		EBT00051368550	Pro1	G	37	Ac-loop	CGG	0.716295	1634	0.882209
EBT00001514637	ProK	38	Ac-loop	CGG	A	A	0.00384149	3496.33	0.336937		EBT00051368550	Pro1	A	38	Ac-loop	CGG	9.19e-05	13872	0.568249
EBT00001514637	ProK	39	Ac-stem	CGG	C	C	0.00013215	5273	0.0282573		EBT00051368550	Pro1	C	39	Ac-stem	CGG	0.00011334	32129.7	0.0248371
EBT00001514637	ProK	40	Ac-stem	CGG	G	G	0.0014202	5426.33	0.0175619		EBT00051368550	Pro1	G	40	Ac-stem	CGG	0.000621452	32948	0.00357867
EBT00001514637	ProK	41	Ac-stem	CGG	A	A	0.00099542	5523.33	0.00587953		EBT00051368550	Pro1	A	41	Ac-stem	CGG	0.000706941	33066.3	0.00186147
EBT00001514637	ProK	42	Ac-stem	CGG	A	A	0.00055837	5556	0.00394407		EBT00051368550	Pro1	G	42	Ac-stem	CGG	0.001612	33128	0.0064084
EBT00001514637	ProK	43	Ac-stem	CGG	G	G	0.00232816	5578	0.00125336		EBT00051368550	Pro1	A	43	Ac-stem	CGG	0.00113019	33341.7	0.00240361
EBT00001514637	ProK	44	V-region	CGG	G	G	0.0118598	5585	0.00119225		EBT00051368550	Pro1	A	44	V-region	CGG	0.000768409	33422	0.000647856
EBT00001514637	ProK	45	V-region	CGG	G	G	0.00883674	5591.67	0.0179146		EBT00051368550	Pro1	G	45	V-region	CGG	0.00176271	33443.7	0.000985761
EBT00001514637	ProK	46	V-region	CGG	G	m7G	0.013565	5693.67	0.113964		EBT00051368550	Pro1	G	46	V-region	CGG	0.005096	33476.7	0.00929251
EBT00001514637	ProK	47	V-region	CGG	T	U	0.0250554	6426	0.0031027		EBT00051368550	Pro1	T	47	V-region	CGG	0.0061806	33790.7	0.000167671
EBT00001514637	ProK	48	V-region	CGG	C	C	0.0183423	6446	0.0006718		EBT00051368550	Pro1	C	48	V-region	CGG	0.00481595	33796.3	0.0004732
EBT00001514637	ProK	49	T-stem	CGG	G	G	0.0206444	6450.33	0.0029883		EBT00051368550	Pro1	G	49	T-stem	CGG	0.0037499	33812.3	0.000748673
EBT00001514637	ProK	50	T-stem	CGG	G	G	0.0209079	6469.67	0.00568648		EBT00051368550	Pro1	C	50	T-stem	CGG	0.0022616	33837.7	0.000403726
EBT00001514637	ProK	51	T-stem	CGG	A	A	0.00473623	6506.67	0.0007167		EBT00051368550	Pro1	T	51	T-stem	CGG	0.00543022	33851.3	2.95401e-05
EBT00001514637	ProK	52	T-stem	CGG	G	G	0.0100358	6511.33	0.00102281		EBT00051368550	Pro1	G	52	T-stem	CGG	0.00245694	33852.3	0.000246107
EBT00001514637	ProK	53	T-stem	CGG	G	G	0.0102612	6518	0.0138188		EBT00051368550	Pro1	G	53	T-stem	CGG	0.00278294	33860.7	0.00193557
EBT00001514637	ProK	54	T-loop	CGG	T	T	0.00296641	6609.33	0.00035291		EBT00051368550	Pro1	T	54	T-loop	CGG	0.000776922	33926.3	0.000137534
EBT00001514637	ProK	55	T-loop	CGG	T	Y	0.00076109	6611.67	0		EBT00051368550	Pro1	T	55	T-loop	CGG	0.000212158	33931	0
EBT00001514637	ProK	56	T-loop	CGG	C	C	0.00023449	6611.67	0		EBT00051368550	Pro1	C	56	T-loop	CGG	0.000279464	33931	0
EBT00001514637	ProK	57	T-loop	CGG	G	G	0.00038306	6611.67	0		EBT00051368550	Pro1	G	57	T-loop	CGG	0.000252157	33931	0
EBT00001514637	ProK	58	T-loop	CGG	A	A	0.00045679	6611	0.00010083		EBT00051368550	Pro1	A	58	T-loop	CGG	9.78e-05	33929.7	3.92953e-05
EBT00001514637	ProK	59	T-loop	CGG	A	A	0.00781742	6611.67	0		EBT00051368550	Pro1	A	59	T-loop	CGG	0.00218851	33931	0
EBT00001514637	ProK	60	T-loop	CGG	T	U	0.0165772	6611.67	0		EBT00051368550	Pro1	T	60	T-loop	CGG	0.0029967	33929.7	0
EBT00001514637	ProK	61	T-stem	CGG	C	C	0.018727	6609.67	0.00025209		EBT00051368550	Pro1	C	61	T-stem	CGG	0.00274452	33926	8.84199e-05
EBT00001514637	ProK	62	T-stem	CGG	C	C	0.0131784	6611.33	0		EBT00051368550	Pro1	C	62	T-stem	CGG	0.00385667	33929	0
EBT00001514637	ProK	63	T-stem	CGG	T	U	0.0171825	6610.67	0.00015125		EBT00051368550	Pro1	A	63	T-stem	CGG	0.00126548	33922	0
EBT00001514637	ProK	64	T-stem	CGG	C	C	0.0100141	6611.67	0		EBT00051368550	Pro1	G	64	T-stem	CGG	0.00413124	33922	0.000265244
EBT00001514637	ProK	65	T-stem	CGG	T	U	0.0224516	6610.33	0.00015126		EBT00051368550	Pro1	T	65	T-stem	CGG	0.00524514	33931	0
EBT00001514637	ProK	66	Acc-stem	CGG	A	A	0.00248264	6611.33	5.04e-05		EBT00051368550	Pro1	C	66	Acc-stem	CGG	0.00247273	33925.7	9.82521e-06
EBT00001514637	ProK	67	Acc-stem	CGG	T	U	0.0233473	6611.67	0		EBT00051368550	Pro1	G	67	Acc-stem	CGG	0.00413008	33926	0.00011789
EBT00001514637	ProK	68	Acc-stem	CGG	C	C	0.0252774	6610.67	0		EBT00051368550	Pro1	C	68	Acc-stem	CGG	0.00142014	33930	0
EBT00001514637	ProK	69	Acc-stem	CGG	A	A	0.00327077	6610.33	0		EBT00051368550	Pro1	T	69	Acc-stem	CGG	0.00424478	33929	0
EBT00001514637	ProK	70	Acc-stem	CGG	C	C	0.0151306	6610	0.00010085		EBT00051368550	Pro1	C	70	Acc-stem	CGG	0.00459	33928.3	2.9473e-05
EBT00001514637	ProK	71	Acc-stem	CGG	C	C	0.0304386	6610.67	0		EBT00051368550	Pro1	C	71	Acc-stem	CGG	0.00632506	33929.3	0
EBT00001514637	ProK	72	Acc-stem	CGG	G	G	0.0149631	6609	5.04e-05		EBT00051368550	Pro1	G	72	Acc-stem	CGG	0.00456863	33912	0.000481407
EBT00001514637	ProK	73	0	CGG	A	A	0.0260814	6609.33	0.00015128		EBT00051368550	Pro1	A	73	0	CGG	0.00567969	33928.3	5.89443e-05
EBT00001514637	ProK	74	0	CGG	C	C	0.00756238	6610.33	0		EBT00051368550	Pro1	C	74	0	CGG	0.00150217	33930.3	0
EBT00001514637	ProK	75	0	CGG	C	C	0	6610.33	0		EBT00051368550	Pro1	C	75	0	CGG	0	32079.3	0
EBT00001514637	ProK	76	0	CGG	A	A	0	5709	0		EBT00051368550	Pro1	A	76	0	CGG	0	27021.7	0
EBT00001514734	ThrW	1	Acc-stem	CGU	G	G	NA	1.66667	NA		EBT00051367683	Thr1	G	1	Acc-stem	CGU	NA	34.3333	NA
EBT00001514734	ThrW	2	Acc-stem	CGU	C	C	NA	1.66667	NA		EBT00051367683	Thr1	C	2	Acc-stem	CGU	NA	39.3333	NA
EBT00001514734	ThrW	3	Acc-stem	CGU	C	C	NA	1.66667	NA		EBT00051367683	Thr1	C	3	Acc-stem	CGU	NA	45	NA
EBT00001514734	ThrW	4	Acc-stem	CGU	G	G	NA	1.66667	NA		EBT00051367683	Thr1	G	4	Acc-stem	CGU	NA	45	NA
EBT00001514734	ThrW	5	Acc-stem	CGU	A	A	NA	1.66667	NA		EBT00051367683	Thr1	G	5	Acc-stem	CGU	NA	45	NA
EBT00001514734	ThrW	6	Acc-stem	CGU	T	U	NA	1.66667	NA		EBT00051367683	Thr1	A	6	Acc-stem	CGU	NA	51	NA
EBT00001514734	ThrW	7	Acc-stem	CGU	A	A	NA	1.66667	NA		EBT00051367683	Thr1	T	7	Acc-stem	CGU	NA	51	NA
EBT00001514734	ThrW	8	0	CGU	T	s4U	NA	1.66667	NA		EBT00051367683	Thr1	T	8	0	CGU	NA	51.3333	NA
EBT00001514734	ThrW	9	0	CGU	A	A	NA	1.66667	NA		EBT00051367683	Thr1	A	9	0	CGU	NA	56.3333	NA
EBT00001514734	ThrW	10	D-stem	CGU	G	G	NA	1.66667	NA		EBT00051367683	Thr1	G	10	D-stem	CGU	NA	56.3333	NA
EBT00001514734	ThrW	11	D-stem	CGU	C	C	NA	1.66667	NA		EBT00051367683	Thr1	C	11	D-stem	CGU	NA	56.3333	NA
EBT00001514734	ThrW	12	D-stem	CGU	T	U	NA	1.66667	NA		EBT00051367683	Thr1	T	12	D-stem	CGU	NA	61.3333	NA
EBT00001514734	ThrW	13	D-stem	CGU	C	C	NA	1.66667	NA		EBT00051367683	Thr1	C	13	D-stem	CGU	NA	61.3333	NA
EBT00001514734	ThrW	14	D-loop	CGU	A	A	NA	1.66667	NA		EBT00051367683	Thr1	A	14	D-loop	CGU	NA	61.3333	NA
EBT00001514734	ThrW	15	D-loop	CGU	G	G	NA	1.66667	NA		EBT00051367683	Thr1	G	15	D-loop	CGU	NA	61.3333	NA
EBT00001514734	ThrW	16	D-loop	CGU	T	DD	NA	1.66667	NA		EBT00051367683	Thr1	T	16	D-loop	CGU	NA	88.6667	NA
EBT00001514734	ThrW	17	D-loop	CGU	T	DD	NA	1.66667	NA		EBT00051367683	Thr1	C	17	D-loop	CGU	NA	88.6667	NA
EBT00001514734	ThrW	18	D-loop	CGU	G	G	NA	1.66667	NA		EBT00051367683	Thr1	G	18	D-loop	CGU	NA	88.6667	NA
EBT00001514734	ThrW	19	D-loop	CGU	G	G	NA	1.66667	NA		EBT00051367683	Thr1	G	19	D-loop	CGU	NA	88.6667	NA
EBT00001514734	ThrW	20	D-loop	CGU	T	D	NA	1.66667	NA		EBT00051367683	Thr1	T	20	D-loop	CGU	0.00146199	105.333	0
EBT00001514734	ThrW	21	D-loop	CGU	A	A	NA	1.66667	NA		EBT00051367683	Thr1	A	21	D-loop	CGU	0.00146199	105.333	0.0567164
EBT00001514734	ThrW	22	D-stem	CGU	G	G	NA	1.66667	NA		EBT00051367683	Thr1	G	22	D-stem	CGU	0	111.667	0
EBT00001514734	ThrW	23	D-stem	CGU	A	A	NA	1.66667	NA		EBT00051367683	Thr1	A	23	D-stem	CGU	0.00134953	111.667	0
EBT00001514734	ThrW	24	D-stem	CGU	G	G	NA	1.66667	NA		EBT00051367683	Thr1	G	24	D-stem	CGU	0	111.667	0
EBT00001514734	ThrW	25	D-stem	CGU	C	C	NA	1.66667	NA		EBT00051367683	Thr1	C	25	D-stem	CGU	0	111.667	0.0401146
EBT00001514734	ThrW	26	0	CGU	A	A	NA	1.66667	NA		EBT00051367683	Thr1	A	26	0	CGU	0	116.333	0
EBT00001514734	ThrW	27	Ac-Stem	CGU	G	G	NA	1.66667	NA		EBT00051367683	Thr1	G	27	Ac-stem	CGU	0	116.333	0
EBT00001514734	ThrW	28	Ac-Stem	CGU	C	C	NA	1.66667	NA		EBT00051367683	Thr1	C	28	Ac-stem	CGU	0	116.333	0.00285714
EBT00001514734	ThrW	29	Ac-Stem	CGU	G	G	NA	1.66667	NA		EBT00051367683	Thr1	T	29	Ac-stem	CGU	0.00692686	116.667	0
EBT00001514734	ThrW	30	Ac-Stem	CGU	C	C	NA	1.66667	NA		EBT00051367683	Thr1	C	30	Ac-stem	CGU	0.00127714	116.667	0.704641
EBT00001514734	ThrW	31	Ac-Stem	CGU	A	A	NA	1.66667	NA		EBT00051367683	Thr1	A	31	Ac-stem	CGU	0.00127714	395	0.649823
EBT00001514734	ThrW	32	Ac-loop	CGU	T	U	NA	2.66667	NA		EBT00051367683	Thr1	T	32	Ac-loop	CGU	0.00032144	1128	0.101434
EBT00001514734	ThrW	33	Ac-loop	CGU	T	U	NA	2	NA		EBT00051367683	Thr1	T	33	Ac-loop	CGU	0.000791802	1255.33	0.0133613
EBT00001514734	ThrW	34	Ac-loop	CGU	C	C	NA	2	NA		EBT00051367683	Thr1	C	34	Ac-loop	CGU	0.00311894	1272.33	0.0523833
EBT00001514734	ThrW	35	Ac-loop	CGU	G	G	NA	3.33333	NA		EBT00051367683	Thr1	G	35	Ac-loop	CGU	0.00295996	1342.67	0.311571
EBT00001514734	ThrW	36	Ac-loop	CGU	T	U	NA	4.33333	NA		EBT00051367683	Thr1	T	36	Ac-loop	CGU	0.00190532	1950.33	0.0901882
EBT00001514734	ThrW	37	Ac-loop	CGU	A	ct6A	NA	4.33333	NA		EBT00051367683	Thr1	A	37	Ac-loop	CGU	0.00213927	2143.67	0.583457
EBT00001514734	ThrW	38	Ac-loop	CGU	A	A	NA	9.66667	NA		EBT00051367683	Thr1	A	38	Ac-loop	CGU	0.00582218	5146.33	0.254155
EBT00001514734	ThrW	39	Ac-stem	CGU	T	Y	NA	12	NA		EBT00051367683	Thr1	T	39	Ac-stem	CGU	0.00168459	6900	0.0312164
EBT00001514734	ThrW	40	Ac-stem	CGU	G	G	NA	12	NA		EBT00051367683	Thr1	G	40	Ac-stem	CGU	0.00136249	7122.33	0.00512176
EBT00001514734	ThrW	41	Ac-stem	CGU	C	C	NA	12	NA		EBT00051367683	Thr1	A	41	Ac-stem	CGU	0.000571192	7159	0.000279291
EBT00001514734	ThrW	42	Ac-stem	CGU	G	G	NA	12	NA		EBT00051367683	Thr1	G	42	Ac-stem	CGU	0.000974988	7161	0.0018121
EBT00001514734	ThrW	43	Ac-stem	CGU	A	A	NA	12.3333	NA		EBT00051367683	Thr1	A	43	Ac-stem	CGU	0.000687293	7174	0.000696476
EBT00001514734	ThrW	44	V-region	CGU	A	A	NA	12.3333	NA		EBT00051367683	Thr1	A	44	V-region	CGU	0.000563533	7179	0
EBT00001514734	ThrW	45	V-region	CGU	G	G	NA	12.3333	NA		EBT00051367683	Thr1	G	45	V-region	CGU	0.00202375	7179	0.00203883
EBT00001514734	ThrW	46	V-region	CGU	G	m7G	NA	12.3333	NA		EBT00051367683	Thr1	G	46	V-region	CGU	0.00254067	7193.67	0.0127179
EBT00001514734	ThrW	47	V-region	CGU	T	U	NA	12.3333	NA		EBT00051367683	Thr1	T	47	V-region	CGU	0.00822133	7286.33	0.000685746
EBT00001514734	ThrW	48	V-region	CGU	C	C	NA	12.3333	NA		EBT00051367683	Thr1	C	48	V-region	CGU	0.00385331	7291.33	0
EBT00001514734	ThrW	49	T-stem	CGU	G	G	NA	12.3333	NA		EBT00051367683	Thr1	G	49	T-stem	CGU	0.0040164	7285.67	0.00100553
EBT00001514734	ThrW	50	T-stem	CGU	T	U	NA	12.3333	NA		EBT00051367683	Thr1	G	50	T-stem	CGU	0.00275257	7293	0
EBT00001514734	ThrW	51	T-stem	CGU	A	A	NA	12.3333	NA		EBT00051367683	Thr1	G	51	T-stem	CGU	0.00340314	7293	0
EBT00001514734	ThrW	52	T-stem	CGU	G	G	NA	12.3333	NA		EBT00051367683	Thr1	G	52	T-stem	CGU	0.00187898	7293	0.000319839
EBT00001514734	ThrW	53	T-stem	CGU	G	G	NA	12.3333	NA		EBT00051367683	Thr1	G	53	T-stem	CGU	0.00184377	7295.33	0.00341515
EBT00001514734	ThrW	54	T-loop	CGU	T	T	NA	12.3333	NA		EBT00051367683	Thr1	T	54	T-loop	CGU	0.000968967	7320.33	4.55333e-05
EBT00001514734	ThrW	55	T-loop	CGU	T	Y	NA	12.3333	NA		EBT00051367683	Thr1	T	55	T-loop	CGU	0.000423463	7320.67	0
EBT00001514734	ThrW	56	T-loop	CGU	C	C	NA	12.3333	NA		EBT00051367683	Thr1	C	56	T-loop	CGU	0.000504157	7320.33	4.55333e-05
EBT00001514734	ThrW	57	T-loop	CGU	G	G	NA	12.3333	NA		EBT00051367683	Thr1	G	57	T-loop	CGU	0.00041259	7320.67	0
EBT00001514734	ThrW	58	T-loop	CGU	A	A	NA	12.3333	NA		EBT00051367683	Thr1	A	58	T-loop	CGU	0.000478983	7320.67	0
EBT00001514734	ThrW	59	T-loop	CGU	C	C	NA	12.3333	NA		EBT00051367683	Thr1	T	59	T-loop	CGU	0.00655524	7320.67	0
EBT00001514734	ThrW	60	T-loop	CGU	T	U	NA	12.3333	NA		EBT00051367683	Thr1	T	60	T-loop	CGU	0.00400053	7320.67	0
EBT00001514734	ThrW	61	T-stem	CGU	C	C	NA	12.3333	NA		EBT00051367683	Thr1	C	61	T-stem	CGU	0.00674397	7320.67	0
EBT00001514734	ThrW	62	T-stem	CGU	C	C	NA	12.3333	NA		EBT00051367683	Thr1	C	62	T-stem	CGU	0.00485864	7320.67	0
EBT00001514734	ThrW	63	T-stem	CGU	T	U	NA	12.3333	NA		EBT00051367683	Thr1	T	63	T-stem	CGU	0.00407113	7320.67	0
EBT00001514734	ThrW	64	T-stem	CGU	A	A	NA	12.3333	NA		EBT00051367683	Thr1	C	64	T-stem	CGU	0.00219783	7320.67	0
EBT00001514734	ThrW	65	T-stem	CGU	T	U	NA	12.3333	NA		EBT00051367683	Thr1	T	65	T-stem	CGU	0.00621984	7320.67	0
EBT00001514734	ThrW	66	Acc-stem	CGU	T	U	NA	12.3333	NA		EBT00051367683	Thr1	A	66	Acc-stem	CGU	0.000949109	7320.67	0
EBT00001514734	ThrW	67	Acc-stem	CGU	A	A	NA	12.3333	NA		EBT00051367683	Thr1	T	67	Acc-stem	CGU	0.00836779	7320.67	0
EBT00001514734	ThrW	68	Acc-stem	CGU	T	U	NA	12.3333	NA		EBT00051367683	Thr1	C	68	Acc-stem	CGU	0.00760054	7320	9.10664e-05
EBT00001514734	ThrW	69	Acc-stem	CGU	C	C	NA	12.3333	NA		EBT00051367683	Thr1	C	69	Acc-stem	CGU	0.00885738	7320.67	0
EBT00001514734	ThrW	70	Acc-stem	CGU	G	G	NA	12.3333	NA		EBT00051367683	Thr1	G	70	Acc-stem	CGU	0.0052552	7314.67	0.000683091
EBT00001514734	ThrW	71	Acc-stem	CGU	G	G	NA	12.3333	NA		EBT00051367683	Thr1	G	71	Acc-stem	CGU	0.00449638	7319.67	4.55373e-05
EBT00001514734	ThrW	72	Acc-stem	CGU	C	C	NA	12.3333	NA		EBT00051367683	Thr1	C	72	Acc-stem	CGU	0.00355969	7320	4.55352e-05
EBT00001514734	ThrW	73	0	CGU	A	A	NA	12.3333	NA		EBT00051367683	Thr1	A	73	0	CGU	0.0044748	7320.33	0
EBT00001514734	ThrW	74	0	CGU	C	C	NA	12.3333	NA		EBT00051367683	Thr1	C	74	0	CGU	0.00198261	7320.33	0
EBT00001514734	ThrW	75	0	CGU	C	C	NA	12.3333	NA		EBT00051367683	Thr1	C	75	0	CGU	0	6847.33	0
EBT00001514734	ThrW	76	0	CGU	A	A	NA	12	NA		EBT00051367683	Thr1	A	76	0	CGU	0	5794	0
EBT00001514723	PheU	1	Acc-stem	GAA	G	G	0	444	0.00224719		EBT00051367160	Phe1	G	1	Acc-stem	GAA	0	3120.33	0.0480016
EBT00001514723	PheU	2	Acc-stem	GAA	C	C	0	445	0.000748503		EBT00051367160	Phe1	C	2	Acc-stem	GAA	0	3277.67	0.0111625
EBT00001514723	PheU	3	Acc-stem	GAA	C	C	0.00140251	445.333	0.000747943		EBT00051367160	Phe1	C	3	Acc-stem	GAA	0.00196332	3314.67	0.00310777
EBT00001514723	PheU	4	Acc-stem	GAA	C	C	0.000511247	445.667	0		EBT00051367160	Phe1	C	4	Acc-stem	GAA	0.00277599	3325	0.00835073
EBT00001514723	PheU	5	Acc-stem	GAA	G	G	0.153317	445.667	0		EBT00051367160	Phe1	A	5	Acc-stem	GAA	0.00159794	3353	9.94035e-05
EBT00001514723	PheU	6	Acc-stem	GAA	G	G	0.00214362	445.667	0.0772947		EBT00051367160	Phe1	G	6	Acc-stem	GAA	0.00216997	3353.33	0.00208313
EBT00001514723	PheU	7	Acc-stem	GAA	A	A	0.141408	483	0.595364		EBT00051367160	Phe1	G	7	Acc-stem	GAA	0.00808564	3360.33	0.0554671
EBT00001514723	PheU	8	0	GAA	T	s4U	0.00339849	1193.67	0.0730003		EBT00051367160	Phe1	T	8	0	GAA	0.0546594	3557.67	0.00494126
EBT00001514723	PheU	9	0	GAA	A	A	0	1287.67	0.010502		EBT00051367160	Phe1	A	9	0	GAA	0.00069577	3575.33	0.00500928
EBT00001514723	PheU	10	D-stem	GAA	G	G	0.00127005	1301.33	0.0121457		EBT00051367160	Phe1	G	10	D-stem	GAA	0.00202034	3593.33	0.0226655
EBT00001514723	PheU	11	D-stem	GAA	C	C	0.00878124	1317.33	0.0538664		EBT00051367160	Phe1	C	11	D-stem	GAA	0.00394908	3676.67	0.103252
EBT00001514723	PheU	12	D-stem	GAA	T	U	0.00211224	1392.33	0		EBT00051367160	Phe1	T	12	D-stem	GAA	0.00477299	4100	0.00501537
EBT00001514723	PheU	13	D-stem	GAA	C	C	0.00246128	1392.33	0.000239349		EBT00051367160	Phe1	C	13	D-stem	GAA	0.00239048	4120.67	0.00466989
EBT00001514723	PheU	14	D-loop	GAA	A	A	0.00191339	1392.67	0		EBT00051367160	Phe1	A	14	D-loop	GAA	0.000714629	4140	0.000161005
EBT00001514723	PheU	15	D-loop	GAA	G	G	0.00096249	1392.67	0.0164783		EBT00051367160	Phe1	G	15	D-loop	GAA	0.00087492	4140.67	0.217019
EBT00001514723	PheU	16	D-loop	GAA	T	D	0.00271073	1416	0		EBT00051367160	Phe1	T	16	D-loop	GAA	0.00295086	5288.33	0.0102315
EBT00001514723	PheU	17	D-loop	GAA	C	C	0.692019	1416	0.0732984		EBT00051367160	Phe1	T	17	D-loop	GAA	0.00864581	5343	0.012141
EBT00001514723	PheU	18	D-loop	GAA	G	G	0.0015114	1528	0.00520833		EBT00051367160	Phe1	G	18	D-loop	GAA	0.00127778	5408.67	0.00721977
EBT00001514723	PheU	19	D-loop	GAA	G	G	0.000440639	1536	0.040999		EBT00051367160	Phe1	G	19	D-loop	GAA	0.000672187	5448	0.0558059
EBT00001514723	PheU	20	D-loop	GAA	T	D	0.00209947	1601.67	0.00743648		EBT00051367160	Phe1	T	20	D-loop	GAA	0.00305017	5770	0.000692761
EBT00001514723	PheU	21	D-loop	GAA	A	A	0.000704597	1613.67	0.000206526		EBT00051367160	Phe1	A	21	D-loop	GAA	0.000662861	5774	0.00402484
EBT00001514723	PheU	22	D-stem	GAA	G	G	0.000430209	1614	0.00329354		EBT00051367160	Phe1	G	22	D-stem	GAA	0.00171205	5797.33	0.00417979
EBT00001514723	PheU	23	D-stem	GAA	A	A	0.000536803	1619.33	0		EBT00051367160	Phe1	A	23	D-stem	GAA	0.00111431	5821.67	0
EBT00001514723	PheU	24	D-stem	GAA	G	G	0.000838214	1619.33	0.00796406		EBT00051367160	Phe1	G	24	D-stem	GAA	0.00160388	5821.67	0.0159455
EBT00001514723	PheU	25	D-stem	GAA	C	C	0.00125473	1632.33	0.00244449		EBT00051367160	Phe1	C	25	D-stem	GAA	0.00259418	5916	0.0130679
EBT00001514723	PheU	26	0	GAA	A	A	0.000555078	1636.33	0		EBT00051367160	Phe1	A	26	0	GAA	0.0016348	5994.33	0.00673847
EBT00001514723	PheU	27	Ac-Stem	GAA	G	G	0.000400491	1636.33	0.00385552		EBT00051367160	Phe1	G	27	Ac-stem	GAA	0.002473	6035	0.00132385
EBT00001514723	PheU	28	Ac-Stem	GAA	G	G	0	1642.67	0		EBT00051367160	Phe1	G	28	Ac-stem	GAA	0.00227714	6043	0
EBT00001514723	PheU	29	Ac-Stem	GAA	G	G	0.000399497	1642.67	0		EBT00051367160	Phe1	G	29	Ac-stem	GAA	0.00357058	6042.67	0
EBT00001514723	PheU	30	Ac-Stem	GAA	G	G	0	1642.67	0.00564972		EBT00051367160	Phe1	G	30	Ac-stem	GAA	0.0014514	6025.67	0.0120778
EBT00001514723	PheU	31	Ac-Stem	GAA	A	A	0.000265182	1652	0.0080064		EBT00051367160	Phe1	A	31	Ac-stem	GAA	0.00180115	6099.33	0.0370487
EBT00001514723	PheU	32	Ac-loop	GAA	T	Y	0.000288351	1665.33	0		EBT00051367160	Phe1	T	32	Ac-loop	GAA	0.00295804	6334	0.0184917
EBT00001514723	PheU	33	Ac-loop	GAA	T	U	0.00133022	1665.33	0.0396002		EBT00051367160	Phe1	T	33	Ac-loop	GAA	0.00507552	6453.33	0.0699462
EBT00001514723	PheU	34	Ac-loop	GAA	G	G	0.000678517	1734	0.0186757		EBT00051367160	Phe1	G	34	Ac-loop	GAA	0.00428342	6938.67	0.0612006
EBT00001514723	PheU	35	Ac-loop	GAA	A	A	0.000465549	1767	0.015416		EBT00051367160	Phe1	A	35	Ac-loop	GAA	0.00256286	7391	0.0711323
EBT00001514723	PheU	36	Ac-loop	GAA	A	A	0	1794.67	0.06544		EBT00051367160	Phe1	A	36	Ac-loop	GAA	0.0026266	7957	0.156054
EBT00001514723	PheU	37	Ac-loop	GAA	A	ms2i6A	0.0330766	1920.33	0.311626		EBT00051367160	Phe1	A	37	Ac-loop	GAA	0.0517868	9428.33	0.465948
EBT00001514723	PheU	38	Ac-loop	GAA	A	A	0.00354186	2789.67	0.0468109		EBT00051367160	Phe1	A	38	Ac-loop	GAA	0.00978558	17654.3	0.10724
EBT00001514723	PheU	39	Ac-stem	GAA	T	Y	0.0011965	2926.67	0.00306574		EBT00051367160	Phe1	T	39	Ac-stem	GAA	0.0011798	19775	0.00516493
EBT00001514723	PheU	40	Ac-stem	GAA	C	C	0.00120666	2935.67	0.00328203		EBT00051367160	Phe1	C	40	Ac-stem	GAA	0.00209669	19877.7	0.00234219
EBT00001514723	PheU	41	Ac-stem	GAA	C	C	0.00354008	2945.33	0.000226296		EBT00051367160	Phe1	C	41	Ac-stem	GAA	0.00506107	19924.3	0.00135329
EBT00001514723	PheU	42	Ac-stem	GAA	C	C	0.00143589	2946	0.000791407		EBT00051367160	Phe1	C	42	Ac-stem	GAA	0.00328627	19951.3	0.00126815
EBT00001514723	PheU	43	Ac-stem	GAA	C	C	0.0021473	2948.33	0		EBT00051367160	Phe1	C	43	Ac-stem	GAA	0.00334389	19976.7	0.0031106
EBT00001514723	PheU	44	V-region	GAA	G	G	0.00112029	2808.67	0.0406467		EBT00051367160	Phe1	G	44	V-region	GAA	0.00377886	20039	0.0159112
EBT00001514723	PheU	45	V-region	GAA	T	U	0.00540247	2927.67	0.0563017		EBT00051367160	Phe1	T	45	V-region	GAA	0.00838699	20363	0.00246571
EBT00001514723	PheU	46	V-region	GAA	G	m7G	0.00559051	3102.33	0.190766		EBT00051367160	Phe1	G	46	V-region	GAA	0.00906244	20413.3	0.0253995
EBT00001514723	PheU	47	V-region	GAA	T	acp3U	0.0367106	3833.67	0.0566765		EBT00051367160	Phe1	T	47	V-region	GAA	0.00520106	20945.3	0.000349996
EBT00001514723	PheU	48	V-region	GAA	C	C	0.00129696	4064	0.0025362		EBT00051367160	Phe1	C	48	V-region	GAA	0.0034461	20952.7	0.00036577
EBT00001514723	PheU	49	T-stem	GAA	C	C	0.292913	4074.33	0.012203		EBT00051367160	Phe1	G	49	T-stem	GAA	0.00695642	20960.3	0.00168289
EBT00001514723	PheU	50	T-stem	GAA	T	U	0.290431	4124.67	0		EBT00051367160	Phe1	G	50	T-stem	GAA	0.00472873	20995.7	0.00130016
EBT00001514723	PheU	51	T-stem	GAA	T	U	0.28986	4124.67	0		EBT00051367160	Phe1	C	51	T-stem	GAA	0.00615721	21023	0.000871301
EBT00001514723	PheU	52	T-stem	GAA	G	G	0.00270539	4124.67	0.00274017		EBT00051367160	Phe1	G	52	T-stem	GAA	0.00226695	21041.3	0.000649094
EBT00001514723	PheU	53	T-stem	GAA	G	G	0.00206158	4136	0.00345354		EBT00051367160	Phe1	G	53	T-stem	GAA	0.00291454	21055	0.00585486
EBT00001514723	PheU	54	T-loop	GAA	T	T	0.00247268	4150.33	8.03085e-05		EBT00051367160	Phe1	T	54	T-loop	GAA	0.00278122	21179	1.57385e-05
EBT00001514723	PheU	55	T-loop	GAA	T	Y	0.000938372	4150.67	0		EBT00051367160	Phe1	T	55	T-loop	GAA	0.00165189	21179.3	0
EBT00001514723	PheU	56	T-loop	GAA	C	C	0.159142	4150.67	0		EBT00051367160	Phe1	C	56	T-loop	GAA	0.0029532	21179.3	0
EBT00001514723	PheU	57	T-loop	GAA	G	G	0.00235309	4150.67	0		EBT00051367160	Phe1	G	57	T-loop	GAA	0.00111085	21179.3	0
EBT00001514723	PheU	58	T-loop	GAA	A	A	0	4150.67	0		EBT00051367160	Phe1	A	58	T-loop	GAA	0.00057081	21179.3	0
EBT00001514723	PheU	59	T-loop	GAA	T	U	0.00219699	4150.67	0		EBT00051367160	Phe1	T	59	T-loop	GAA	0.00583942	21179.3	0
EBT00001514723	PheU	60	T-loop	GAA	T	U	0.00158996	4150.67	0		EBT00051367160	Phe1	T	60	T-loop	GAA	0.0042741	21179.3	0
EBT00001514723	PheU	61	T-stem	GAA	C	C	0.00306997	4150.67	0		EBT00051367160	Phe1	C	61	T-stem	GAA	0.00419645	21178.3	3.14779e-05
EBT00001514723	PheU	62	T-stem	GAA	C	C	0.00263599	4147.67	0		EBT00051367160	Phe1	C	62	T-stem	GAA	0.00506628	21179	0
EBT00001514723	PheU	63	T-stem	GAA	G	G	0.0025096	3184.67	0.000836645		EBT00051367160	Phe1	G	63	T-stem	GAA	0.00386577	21178.7	1.57387e-05
EBT00001514723	PheU	64	T-stem	GAA	A	A	0.0748992	3187.33	0.232091		EBT00051367160	Phe1	T	64	T-stem	GAA	0.00637975	21179	0
EBT00001514723	PheU	65	T-stem	GAA	G	G	0.0584019	4150.67	0		EBT00051367160	Phe1	C	65	T-stem	GAA	0.00355908	21176.7	7.86965e-05
EBT00001514723	PheU	66	Acc-stem	GAA	T	U	0.0589703	4150.67	0		EBT00051367160	Phe1	C	66	Acc-stem	GAA	0.00748961	21178.3	0
EBT00001514723	PheU	67	Acc-stem	GAA	C	C	0.000657302	4150.33	8.03085e-05		EBT00051367160	Phe1	C	67	Acc-stem	GAA	0.0023991	21143.7	0
EBT00001514723	PheU	68	Acc-stem	GAA	C	C	0.0603177	4150.67	0		EBT00051367160	Phe1	T	68	Acc-stem	GAA	0.00814683	21142	0.00088214
EBT00001514723	PheU	69	Acc-stem	GAA	G	G	0.00146531	4150	0.000160617		EBT00051367160	Phe1	G	69	Acc-stem	GAA	0.00656648	21160.7	0.000802732
EBT00001514723	PheU	70	Acc-stem	GAA	G	G	0.00169818	4150.67	0		EBT00051367160	Phe1	G	70	Acc-stem	GAA	0.00726483	21177.7	4.72173e-05
EBT00001514723	PheU	71	Acc-stem	GAA	G	G	0.00105163	4150.33	8.03085e-05		EBT00051367160	Phe1	G	71	Acc-stem	GAA	0.00704448	21178.7	0
EBT00001514723	PheU	72	Acc-stem	GAA	C	C	0.00129208	4150.67	0		EBT00051367160	Phe1	C	72	Acc-stem	GAA	0.00359069	21178.7	0
EBT00001514723	PheU	73	0	GAA	A	A	0.00270958	4150.67	0		EBT00051367160	Phe1	A	73	0	GAA	0.0052742	21177.3	0
EBT00001514723	PheU	74	0	GAA	C	C	0.00035983	4150.33	0		EBT00051367160	Phe1	C	74	0	GAA	0.00106511	21175	0
EBT00001514723	PheU	75	0	GAA	C	C	0	4150.33	0		EBT00051367160	Phe1	C	75	0	GAA	0	19461	0
EBT00001514723	PheU	76	0	GAA	A	A	0	3841.33	0		EBT00051367160	Phe1	A	76	0	GAA	0	16538.7	0
EBT00001514621	ValV	1	Acc-stem	GAC	G	G	NA	0.333333	NA		EBT00051365503	Val1	A	1	Acc-stem	GAC	0	683.667	0.0125181
EBT00001514621	ValV	2	Acc-stem	GAC	C	C	NA	0.333333	NA		EBT00051365503	Val1	G	2	Acc-stem	GAC	0	692.333	0.000481232
EBT00001514621	ValV	3	Acc-stem	GAC	G	G	NA	0.333333	NA		EBT00051365503	Val1	G	3	Acc-stem	GAC	0.00129255	692.667	0
EBT00001514621	ValV	4	Acc-stem	GAC	T	U	NA	0.333333	NA		EBT00051365503	Val1	C	4	Acc-stem	GAC	0.000898078	692.667	0
EBT00001514621	ValV	5	Acc-stem	GAC	T	U	NA	0.333333	NA		EBT00051365503	Val1	A	5	Acc-stem	GAC	0.00186826	692.667	0
EBT00001514621	ValV	6	Acc-stem	GAC	C	C	NA	0.333333	NA		EBT00051365503	Val1	C	6	Acc-stem	GAC	0.0019373	692.667	0
EBT00001514621	ValV	7	Acc-stem	GAC	A	A	NA	0.333333	NA		EBT00051365503	Val1	G	7	Acc-stem	GAC	0	692.667	0
EBT00001514621	ValV	8	0	GAC	T	s4U	NA	0.333333	NA		EBT00051365503	Val1	T	8	0	GAC	0.0225388	692.667	0.0146989
EBT00001514621	ValV	9	0	GAC	A	A	NA	0.333333	NA		EBT00051365503	Val1	A	9	0	GAC	0.000716846	703	0
EBT00001514621	ValV	10	D-stem	GAC	G	G	NA	0.333333	NA		EBT00051365503	Val1	G	10	D-stem	GAC	0.000625978	703	0
EBT00001514621	ValV	11	D-stem	GAC	C	C	NA	0.333333	NA		EBT00051365503	Val1	C	11	D-stem	GAC	0.0014644	703	0.0140252
EBT00001514621	ValV	12	D-stem	GAC	T	U	NA	0.333333	NA		EBT00051365503	Val1	T	12	D-stem	GAC	0	713	0
EBT00001514621	ValV	13	D-stem	GAC	C	C	NA	0.333333	NA		EBT00051365503	Val1	C	13	D-stem	GAC	0.000608828	713	0
EBT00001514621	ValV	14	D-loop	GAC	A	A	NA	0.333333	NA		EBT00051365503	Val1	A	14	D-loop	GAC	0	713	0
EBT00001514621	ValV	15	D-loop	GAC	G	G	NA	0.333333	NA		EBT00051365503	Val1	G	15	D-loop	GAC	0.00118453	713	0.130488
EBT00001514621	ValV	16	D-loop	GAC	T	DD	NA	0.333333	NA		EBT00051365503	Val1	T	16	D-loop	GAC	0.00180864	820	0.0100604
EBT00001514621	ValV	17	D-loop	GAC	T	DD	NA	0.333333	NA		EBT00051365503	Val1	T	17	D-loop	GAC	0.00152735	828.333	0.000804182
EBT00001514621	ValV	18	D-loop	GAC	G	G	NA	0.333333	NA		EBT00051365503	Val1	G	18	D-loop	GAC	0.00153985	829	0.000401929
EBT00001514621	ValV	19	D-loop	GAC	G	G	NA	0.333333	NA		EBT00051365503	Val1	G	19	D-loop	GAC	0.000641026	829.333	0.22996
EBT00001514621	ValV	20	D-loop	GAC	T	DD	NA	0.333333	NA		EBT00051365503	Val1	T	20	D-loop	GAC	0.000761917	1077	0.0241619
EBT00001514621	ValV	20a	D-loop	GAC	T	DD	NA	0.333333	NA		EBT00051365503	Val1	T	20a	D-loop	GAC	0.00198841	1103.67	0.0139964
EBT00001514621	ValV	21	D-loop	GAC	A	A	NA	0.333333	NA		EBT00051365503	Val1	A	21	D-loop	GAC	0.00127998	1119.33	0.00385642
EBT00001514621	ValV	22	D-stem	GAC	G	G	NA	0.333333	NA		EBT00051365503	Val1	G	22	D-stem	GAC	0.000711011	1123.67	0.011147
EBT00001514621	ValV	23	D-stem	GAC	A	A	NA	0.333333	NA		EBT00051365503	Val1	A	23	D-stem	GAC	0.000899736	1136.33	0
EBT00001514621	ValV	24	D-stem	GAC	G	G	NA	0.333333	NA		EBT00051365503	Val1	G	24	D-stem	GAC	0.000528262	1136.33	0.00641213
EBT00001514621	ValV	25	D-stem	GAC	C	C	NA	0.333333	NA		EBT00051365503	Val1	C	25	D-stem	GAC	0.00176877	1143.67	0
EBT00001514621	ValV	26	0	GAC	A	A	NA	0.333333	NA		EBT00051365503	Val1	A	26	0	GAC	0.000896453	1143.67	0
EBT00001514621	ValV	27	Ac-Stem	GAC	C	C	NA	0.333333	NA		EBT00051365503	Val1	C	27	Ac-stem	GAC	0.00194614	1142.33	0.00145688
EBT00001514621	ValV	28	Ac-Stem	GAC	C	C	NA	0.333333	NA		EBT00051365503	Val1	C	28	Ac-stem	GAC	0.00497921	1144	0.00348432
EBT00001514621	ValV	29	Ac-Stem	GAC	A	A	NA	0.333333	NA		EBT00051365503	Val1	A	29	Ac-stem	GAC	0.00319115	1148	0
EBT00001514621	ValV	30	Ac-Stem	GAC	C	C	NA	3.66667	NA		EBT00051365503	Val1	C	30	Ac-stem	GAC	0.0030072	1148	0
EBT00001514621	ValV	31	Ac-Stem	GAC	C	C	NA	12.3333	NA		EBT00051365503	Val1	C	31	Ac-stem	GAC	0.00195499	1148	0.0106291
EBT00001514621	ValV	32	Ac-loop	GAC	T	U	NA	20.3333	NA		EBT00051365503	Val1	T	32	Ac-loop	GAC	0.00612297	1160.33	0
EBT00001514621	ValV	33	Ac-loop	GAC	T	U	NA	20.3333	NA		EBT00051365503	Val1	T	33	Ac-loop	GAC	0.00767469	1134.67	0
EBT00001514621	ValV	34	Ac-loop	GAC	G	G	NA	20.6667	NA		EBT00051365503	Val1	G	34	Ac-loop	GAC	0.00969434	1131	0.124839
EBT00001514621	ValV	35	Ac-loop	GAC	A	A	NA	82.3333	NA		EBT00051365503	Val1	A	35	Ac-loop	GAC	0.00869869	1292.33	0.0621674
EBT00001514621	ValV	36	Ac-loop	GAC	C	C	0.00546483	135.667	0.758457		EBT00051365503	Val1	C	36	Ac-loop	GAC	0.00728183	1378	0.442406
EBT00001514621	ValV	37	Ac-loop	GAC	A	A	0	561.667	0.569494		EBT00051365503	Val1	A	37	Ac-loop	GAC	0.0005048	2471.33	0.347933
EBT00001514621	ValV	38	Ac-loop	GAC	T	U	0.0003858	1304.67	0.19249		EBT00051365503	Val1	T	38	Ac-loop	GAC	0.00380904	3790	0.117716
EBT00001514621	ValV	39	Ac-stem	GAC	G	G	0.00096602	1615.67	0.040198		EBT00051365503	Val1	G	39	Ac-stem	GAC	0.00213621	4295.67	0.0166349
EBT00001514621	ValV	40	Ac-stem	GAC	G	G	0.00022119	1683.33	0.00217348		EBT00051365503	Val1	G	40	Ac-stem	GAC	0.00182544	4368.33	0.00152381
EBT00001514621	ValV	41	Ac-stem	GAC	T	U	0.00357379	1687	0		EBT00051365503	Val1	T	41	Ac-stem	GAC	0.00509043	4375	0
EBT00001514621	ValV	42	Ac-stem	GAC	G	G	0.00080298	1628	0.0518346		EBT00051365503	Val1	G	42	Ac-stem	GAC	0.00297707	3978	0.102707
EBT00001514621	ValV	43	Ac-stem	GAC	G	G	0.00101442	1717	0.0111346		EBT00051365503	Val1	G	43	Ac-stem	GAC	0.00195933	4433.33	0.00864639
EBT00001514621	ValV	44	V-region	GAC	G	G	0.00111212	1736.33	0.00268045		EBT00051365503	Val1	G	44	V-region	GAC	0.00186468	4472	0.00171144
EBT00001514621	ValV	45	V-region	GAC	G	G	0.00207306	1741	0.0143423		EBT00051365503	Val1	G	45	V-region	GAC	0.00194163	4479.67	0.00488708
EBT00001514621	ValV	46	V-region	GAC	G	m7G	0.00392729	1766.33	0.249965		EBT00051365503	Val1	G	46	V-region	GAC	0.00428693	4501.67	0.298113
EBT00001514621	ValV	47	V-region	GAC	T	acp3U	0.0973973	2355	0.0694152		EBT00051365503	Val1	T	47	V-region	GAC	0.128522	6413.67	0.0916773
EBT00001514621	ValV	48	V-region	GAC	C	C	0.00326037	2530.67	0.00511073		EBT00051365503	Val1	C	48	V-region	GAC	0.00278764	7061	0.00254273
EBT00001514621	ValV	49	T-stem	GAC	G	G	0.00112196	2543.67	0.0117845		EBT00051365503	Val1	G	49	T-stem	GAC	0.00134791	7079	0.00826562
EBT00001514621	ValV	50	T-stem	GAC	T	U	0.0048554	2574	0.00064708		EBT00051365503	Val1	T	50	T-stem	GAC	0.00414066	7138	0.000420109
EBT00001514621	ValV	51	T-stem	GAC	T	U	0.00344177	2575.67	0		EBT00051365503	Val1	T	51	T-stem	GAC	0.00494478	7141	0.00158456
EBT00001514621	ValV	52	T-stem	GAC	G	G	0.0049598	2575.67	0.00129249		EBT00051365503	Val1	G	52	T-stem	GAC	0.00299593	7152.33	0.000419268
EBT00001514621	ValV	53	T-stem	GAC	G	G	0.00136245	2579	0.00693107		EBT00051365503	Val1	G	53	T-stem	GAC	0.00114139	7155.33	0.00959675
EBT00001514621	ValV	54	T-loop	GAC	T	T	0.00148767	2597	0		EBT00051365503	Val1	T	54	T-loop	GAC	0.00168981	7224.67	4.61361e-05
EBT00001514621	ValV	55	T-loop	GAC	T	Y	0.00129813	2597	0		EBT00051365503	Val1	T	55	T-loop	GAC	0.000681419	7225	0
EBT00001514621	ValV	56	T-loop	GAC	C	C	0.00060914	2597	0		EBT00051365503	Val1	C	56	T-loop	GAC	0.00121893	7225	0
EBT00001514621	ValV	57	T-loop	GAC	G	G	0.00010013	2597	0		EBT00051365503	Val1	G	57	T-loop	GAC	0.000590085	7225	0
EBT00001514621	ValV	58	T-loop	GAC	A	A	0.00039934	2597	0		EBT00051365503	Val1	A	58	T-loop	GAC	0.000639277	7225	0
EBT00001514621	ValV	59	T-loop	GAC	G	G	0.00075575	2597	0		EBT00051365503	Val1	A	59	T-loop	GAC	0.0013087	7225	0
EBT00001514621	ValV	60	T-loop	GAC	T	U	0.00187627	2597	0		EBT00051365503	Val1	T	60	T-loop	GAC	0.00253877	7225	0
EBT00001514621	ValV	61	T-stem	GAC	C	C	0.0005996	2597	0		EBT00051365503	Val1	C	61	T-stem	GAC	0.00300407	7224.67	4.61361e-05
EBT00001514621	ValV	62	T-stem	GAC	C	C	0.00398262	2597	0		EBT00051365503	Val1	C	62	T-stem	GAC	0.00183713	7225	0
EBT00001514621	ValV	63	T-stem	GAC	A	A	0.00066516	2597	0		EBT00051365503	Val1	A	63	T-stem	GAC	0.00068847	7225	0
EBT00001514621	ValV	64	T-stem	GAC	A	A	0.00175349	2597	0		EBT00051365503	Val1	A	64	T-stem	GAC	0.00139011	7225	0
EBT00001514621	ValV	65	T-stem	GAC	T	U	0.00352725	2597	0		EBT00051365503	Val1	T	65	T-stem	GAC	0.00654058	7225	0
EBT00001514621	ValV	66	Acc-stem	GAC	T	U	0.00451902	2597	0		EBT00051365503	Val1	C	66	Acc-stem	GAC	0.00327217	7225	0
EBT00001514621	ValV	67	Acc-stem	GAC	G	G	0.00293839	2597	0		EBT00051365503	Val1	G	67	Acc-stem	GAC	0.00427067	7225	0
EBT00001514621	ValV	68	Acc-stem	GAC	A	A	0.00169762	2596.67	0.00012835		EBT00051365503	Val1	T	68	Acc-stem	GAC	0.00795628	7225	0
EBT00001514621	ValV	69	Acc-stem	GAC	A	A	0.00309573	2597	0		EBT00051365503	Val1	G	69	Acc-stem	GAC	0.00402701	7225	0
EBT00001514621	ValV	70	Acc-stem	GAC	C	C	0.00469426	2597	0		EBT00051365503	Val1	C	70	Acc-stem	GAC	0.00604919	7224.33	0
EBT00001514621	ValV	71	Acc-stem	GAC	G	G	0.00239838	2597	0		EBT00051365503	Val1	C	71	Acc-stem	GAC	0.00242859	7224.33	0
EBT00001514621	ValV	72	Acc-stem	GAC	C	C	0.0024866	2597	0		EBT00051365503	Val1	T	72	Acc-stem	GAC	0.00562107	7223	0.000230691
EBT00001514621	ValV	73	0	GAC	A	A	0.00264186	2596.67	0		EBT00051365503	Val1	A	73	0	GAC	0.0024504	7224.67	0
EBT00001514621	ValV	74	0	GAC	C	C	0.00246172	2596.67	0		EBT00051365503	Val1	C	74	0	GAC	0.00172047	7224.67	0
EBT00001514621	ValV	75	0	GAC	C	C	0	2596.33	0		EBT00051365503	Val1	C	75	0	GAC	0	6799.67	0
EBT00001514621	ValV	76	0	GAC	A	A	0	2206.33	0		EBT00051365503	Val1	A	76	0	GAC	0	5822.33	0
EBT00001514711	LeuU	1	Acc-stem	GAG	G	G	0	314.333	0.0187305		EBT00051370040	Leu1	G	1	Acc-stem	GAG	0	329	0.0662252
EBT00001514711	LeuU	2	Acc-stem	GAG	C	C	0	320.333	0.00207684		EBT00051370040	Leu1	C	2	Acc-stem	GAG	0	352.333	0.0302752
EBT00001514711	LeuU	3	Acc-stem	GAG	C	C	0.00108578	321	0.00103734		EBT00051370040	Leu1	C	3	Acc-stem	GAG	0.00113766	363.333	0.0232975
EBT00001514711	LeuU	4	Acc-stem	GAG	G	G	0	321.333	0		EBT00051370040	Leu1	G	4	Acc-stem	GAG	0	372	0
EBT00001514711	LeuU	5	Acc-stem	GAG	A	A	0.000816993	321.333	0		EBT00051370040	Leu1	A	5	Acc-stem	GAG	0.000805153	372	0
EBT00001514711	LeuU	6	Acc-stem	GAG	G	G	0.00108578	312	0.0290456		EBT00051370040	Leu1	G	6	Acc-stem	GAG	0.00104822	372	0
EBT00001514711	LeuU	7	Acc-stem	GAG	G	G	0.00108578	321.333	0.0163265		EBT00051370040	Leu1	G	7	Acc-stem	GAG	0.00167321	372	0.0219106
EBT00001514711	LeuU	8	0	GAG	T	U	0.0406961	326.667	0		EBT00051370040	Leu1	T	8	0	GAG	0.0191581	380.333	0
EBT00001514711	LeuU	9	0	GAG	G	G	0	326.667	0		EBT00051370040	Leu1	G	9	0	GAG	0.000868056	380.333	0.0214408
EBT00001514711	LeuU	10	D-stem	GAG	G	G	0.00108578	326.667	0.0140845		EBT00051370040	Leu1	G	10	D-stem	GAG	0.00230484	388.667	0
EBT00001514711	LeuU	11	D-stem	GAG	T	U	0.00847072	331.333	0		EBT00051370040	Leu1	T	11	D-stem	GAG	0.012874	388.667	0
EBT00001514711	LeuU	12	D-stem	GAG	G	G	0.000761035	331.333	0.0321324		EBT00051370040	Leu1	G	12	D-stem	GAG	0.00287356	388.333	0.0017138
EBT00001514711	LeuU	13	D-stem	GAG	G	G	0.0141479	342.333	0.052583		EBT00051370040	Leu1	G	13	D-stem	GAG	0.000716846	389	0.079653
EBT00001514711	LeuU	14	D-loop	GAG	A	A	0	361.333	0.177542		EBT00051370040	Leu1	A	14	D-loop	GAG	0	422.667	0.0253651
EBT00001514711	LeuU	15	D-loop	GAG	A	A	0	439.333	0.312826		EBT00051370040	Leu1	A	15	D-loop	GAG	0.00156145	433.667	0.108904
EBT00001514711	LeuU	16	D-loop	GAG	T	DD	0.00197941	639.333	0.000521105		EBT00051370040	Leu1	T	16	D-loop	GAG	0.00183234	486.667	0
EBT00001514711	LeuU	17	D-loop	GAG	T	DD	0.000716846	639.667	0.000520833		EBT00051370040	Leu1	T	17	D-loop	GAG	0.00183234	486.667	0.00136799
EBT00001514711	LeuU	18	D-loop	GAG	G	Gm	0	640	0		EBT00051370040	Leu1	G	18	D-loop	GAG	0.00252525	487.333	0.0154882
EBT00001514711	LeuU	19	D-loop	GAG	G	G	0.000715308	640	0.0670554		EBT00051370040	Leu1	G	19	D-loop	GAG	0.0120056	495	0.212619
EBT00001514711	LeuU	20	D-loop	GAG	T	D	0.000488759	686	0		EBT00051370040	Leu1	T	20	D-loop	GAG	0.000991515	628.667	0.000529942
EBT00001514711	LeuU	20a	D-loop	GAG	A	A	0.000855059	686	0		EBT00051370040	Leu1	A	20a	D-loop	GAG	0	629	0.0332992
EBT00001514711	LeuU	21	D-loop	GAG	G	G	0.000977517	686	0.010101		EBT00051370040	Leu1	G	21	D-loop	GAG	0.000351247	650.667	0.0151362
EBT00001514711	LeuU	22	D-stem	GAG	A	A	0.00276253	693	0		EBT00051370040	Leu1	A	22	D-stem	GAG	0.0019658	660.667	0.0438977
EBT00001514711	LeuU	23	D-stem	GAG	C	C	0.0010989	693	0.000480769		EBT00051370040	Leu1	C	23	D-stem	GAG	0.0012259	691	0.148665
EBT00001514711	LeuU	24	D-stem	GAG	A	A	0.00131462	693.333	0		EBT00051370040	Leu1	A	24	D-stem	GAG	0.00291965	811.667	0.00855049
EBT00001514711	LeuU	25	D-stem	GAG	C	C	0.000713776	693.333	0		EBT00051370040	Leu1	C	25	D-stem	GAG	0.000498629	818.667	0
EBT00001514711	LeuU	26	0	GAG	G	G	0.0346261	693.333	0		EBT00051370040	Leu1	G	26	0	GAG	0.00647759	818.667	0
EBT00001514711	LeuU	27	Ac-Stem	GAG	C	C	0.00142755	693.333	0		EBT00051370040	Leu1	C	27	Ac-stem	GAG	0	818.667	0.00727567
EBT00001514711	LeuU	28	Ac-Stem	GAG	T	U	0.00546044	693.333	0		EBT00051370040	Leu1	T	28	Ac-stem	GAG	0.00643104	824.667	0
EBT00001514711	LeuU	29	Ac-Stem	GAG	A	A	0.000474158	693.333	0		EBT00051370040	Leu1	A	29	Ac-stem	GAG	0.00171324	824.667	0
EBT00001514711	LeuU	30	Ac-Stem	GAG	C	C	0.0014652	693.333	0		EBT00051370040	Leu1	C	30	Ac-stem	GAG	0.0011653	824.667	0
EBT00001514711	LeuU	31	Ac-Stem	GAG	C	C	0	693.333	0.0262172		EBT00051370040	Leu1	C	31	Ac-stem	GAG	0.00362648	824.667	0.0440495
EBT00001514711	LeuU	32	Ac-loop	GAG	T	U	0.00209084	712	0		EBT00051370040	Leu1	T	32	Ac-loop	GAG	0.00245539	862.667	0.00538048
EBT00001514711	LeuU	33	Ac-loop	GAG	T	U	0.00442835	712	0.00326645		EBT00051370040	Leu1	T	33	Ac-loop	GAG	0.00597017	867.333	0.00497132
EBT00001514711	LeuU	34	Ac-loop	GAG	G	G	0.0280034	714.333	0		EBT00051370040	Leu1	G	34	Ac-loop	GAG	0.00132164	871.667	0.0015273
EBT00001514711	LeuU	35	Ac-loop	GAG	A	A	0.0456588	714.333	0.0110752		EBT00051370040	Leu1	A	35	Ac-loop	GAG	0.00616845	873	0.00720243
EBT00001514711	LeuU	36	Ac-loop	GAG	G	G	0.00104915	722.333	0.0118559		EBT00051370040	Leu1	G	36	Ac-loop	GAG	0.000948992	879.333	0.0112444
EBT00001514711	LeuU	37	Ac-loop	GAG	G	m1G	0.548088	731	0.508737		EBT00051370040	Leu1	G	37	Ac-loop	GAG	0.597149	889.333	0.572436
EBT00001514711	LeuU	38	Ac-loop	GAG	T	Y	0.00137827	1488	0.0526316		EBT00051370040	Leu1	T	38	Ac-loop	GAG	0.00373224	2080	0.029549
EBT00001514711	LeuU	39	Ac-stem	GAG	G	G	0.00163986	1570.67	0.00841751		EBT00051370040	Leu1	G	39	Ac-stem	GAG	0.00258596	2143.33	0.00618238
EBT00001514711	LeuU	40	Ac-stem	GAG	G	G	0.00171531	1584	0.0327702		EBT00051370040	Leu1	G	40	Ac-stem	GAG	0.00155289	2156.67	0.0143205
EBT00001514711	LeuU	41	Ac-stem	GAG	T	U	0.00229265	1637.67	0		EBT00051370040	Leu1	T	41	Ac-stem	GAG	0.00341048	2188	0.000761151
EBT00001514711	LeuU	42	Ac-stem	GAG	A	A	0.000169463	1637.67	0		EBT00051370040	Leu1	A	42	Ac-stem	GAG	0.000770922	2189.67	0.00409339
EBT00001514711	LeuU	43	Ac-stem	GAG	G	G	0	1637.67	0.0072742		EBT00051370040	Leu1	G	43	Ac-stem	GAG	0.000927192	2198.67	0.0175752
EBT00001514711	LeuU	44	V-region	GAG	T	U	0.00380514	1649.67	0.0012109		EBT00051370040	Leu1	T	44	V-region	GAG	0.00380993	2238	0.00636377
EBT00001514711	LeuU	45	V-region	GAG	NA	NA	NA	NA	NA		EBT00051370040	Leu1	G	45	V-region	GAG	0.0130958	2252.33	0.0163051
EBT00001514711	LeuU	V1	V-region	GAG	G	G	0.00130726	1651.67	0.000605083		EBT00051370040	Leu1	G	V1	V-region	GAG	0.0606758	2289.67	0.0433148
EBT00001514711	LeuU	V2	V-region	GAG	C	C	0.119185	1652.67	0.00100745		EBT00051370040	Leu1	C	V2	V-region	GAG	0.00533322	2393.33	0.044196
EBT00001514711	LeuU	V3	V-region	GAG	C	C	0.00392967	1654.33	0		EBT00051370040	Leu1	C	V3	V-region	GAG	0.00424295	2504	0.265617
EBT00001514711	LeuU	V4	V-region	GAG	C	C	0.0063966	1647	0		EBT00051370040	Leu1	NA	V4	V-region	GAG	NA	NA	NA
EBT00001514711	LeuU	V8	V-region	GAG	A	A	0.000614628	1576	0.318634		EBT00051370040	Leu1	A	V8	V-region	GAG	0.00111588	3409.67	0.134529
EBT00001514711	LeuU	V9	V-region	GAG	A	A	0.000960957	2313	0.248945		EBT00051370040	Leu1	T	V9	V-region	GAG	0.00270611	3939.67	0.0119545
EBT00001514711	LeuU	V10	V-region	GAG	T	U	0.00281289	3079.67	0.0108137		EBT00051370040	Leu1	A	V10	V-region	GAG	0.00156106	3987.33	0.0562525
EBT00001514711	LeuU	V11	V-region	GAG	A	A	0.000185082	3113.33	0		EBT00051370040	Leu1	G	V11	V-region	GAG	0.000939084	4225	0.00868137
EBT00001514711	LeuU	V16	V-region	GAG	G	G	0.00103071	3012.33	0.0628435		EBT00051370040	Leu1	NA	V16	V-region	GAG	NA	NA	NA
EBT00001514711	LeuU	V17	V-region	GAG	G	G	0.00204443	3214.33	0.000207361		EBT00051370040	Leu1	G	V17	V-region	GAG	0.00165029	4262	0.0253087
EBT00001514711	LeuU	V18	V-region	GAG	G	G	0.00575289	3215	0.0104648		EBT00051370040	Leu1	C	V18	V-region	GAG	0.00377226	4372.67	0.0405208
EBT00001514711	LeuU	V19	V-region	GAG	C	C	0.00503604	3249	0.0945657		EBT00051370040	Leu1	T	V19	V-region	GAG	0.00400172	4557.33	0
EBT00001514711	LeuU	46	V-region	GAG	T	U	0.00527873	3588.33	0.0211857		EBT00051370040	Leu1	G	46	V-region	GAG	0.00609998	4494.33	0.116969
EBT00001514711	LeuU	48	V-region	GAG	T	U	0.00268847	3666	0.00793794		EBT00051370040	Leu1	T	48	V-region	GAG	0.00300557	5089.67	0.00850649
EBT00001514711	LeuU	49	T-stem	GAG	A	A	0.000612344	3695.33	0.00893975		EBT00051370040	Leu1	A	49	T-stem	GAG	0.0003032	5133.33	0.0150304
EBT00001514711	LeuU	50	T-stem	GAG	C	C	0.0532227	3728.67	0.0033856		EBT00051370040	Leu1	G	50	T-stem	GAG	0.025877	5211.67	0.00572337
EBT00001514711	LeuU	51	T-stem	GAG	G	G	0.00285876	3741.33	0.000445276		EBT00051370040	Leu1	G	51	T-stem	GAG	0.00276566	5241.67	0.007636
EBT00001514711	LeuU	52	T-stem	GAG	G	G	0.00248348	3743	0.000178079		EBT00051370040	Leu1	G	52	T-stem	GAG	0.0036759	5282	0.00289454
EBT00001514711	LeuU	53	T-stem	GAG	G	G	0.00222453	3743.67	0.00452048		EBT00051370040	Leu1	G	53	T-stem	GAG	0.0021737	5297.33	0.00959741
EBT00001514711	LeuU	54	T-loop	GAG	T	T	0.00340193	3760.67	0		EBT00051370040	Leu1	T	54	T-loop	GAG	0.00445981	5348.67	6.23169e-05
EBT00001514711	LeuU	55	T-loop	GAG	T	Y	0.00181441	3760.67	0		EBT00051370040	Leu1	T	55	T-loop	GAG	0.00245682	5349	0
EBT00001514711	LeuU	56	T-loop	GAG	C	C	0.00195644	3760.67	0		EBT00051370040	Leu1	C	56	T-loop	GAG	0.00225368	5348.67	6.23169e-05
EBT00001514711	LeuU	57	T-loop	GAG	A	A	0.0535788	3760.67	0		EBT00051370040	Leu1	G	57	T-loop	GAG	0.02328	5349	0
EBT00001514711	LeuU	58	T-loop	GAG	A	A	0.000434299	3760.67	0		EBT00051370040	Leu1	A	58	T-loop	GAG	0.00033686	5349	0
EBT00001514711	LeuU	59	T-loop	GAG	G	G	0.00154324	3760.67	0		EBT00051370040	Leu1	G	59	T-loop	GAG	0.00056805	5349	0
EBT00001514711	LeuU	60	T-loop	GAG	T	U	0.00158067	3760.67	0		EBT00051370040	Leu1	T	60	T-loop	GAG	0.00228017	5349	0
EBT00001514711	LeuU	61	T-stem	GAG	C	C	0.00312072	3760	0.000177274		EBT00051370040	Leu1	C	61	T-stem	GAG	0.00418802	5346.67	0.000436219
EBT00001514711	LeuU	62	T-stem	GAG	C	C	0.00703814	3760.67	0		EBT00051370040	Leu1	C	62	T-stem	GAG	0.00918961	5349	0
EBT00001514711	LeuU	63	T-stem	GAG	C	C	0.00340008	3760.67	0		EBT00051370040	Leu1	C	63	T-stem	GAG	0.00323935	5348.67	6.23169e-05
EBT00001514711	LeuU	64	T-stem	GAG	G	G	0.0541395	3760.33	0		EBT00051370040	Leu1	C	64	T-stem	GAG	0.0244702	5349	0
EBT00001514711	LeuU	65	T-stem	GAG	T	U	0.00431046	3760.33	8.86369e-05		EBT00051370040	Leu1	T	65	T-stem	GAG	0.00619359	5348.33	0
EBT00001514711	LeuU	66	Acc-stem	GAG	C	C	0.003793	3760.67	0		EBT00051370040	Leu1	C	66	Acc-stem	GAG	0.00506701	5348.33	6.2321e-05
EBT00001514711	LeuU	67	Acc-stem	GAG	C	C	0.00419134	3760	0		EBT00051370040	Leu1	C	67	Acc-stem	GAG	0.00230013	5348.67	0
EBT00001514711	LeuU	68	Acc-stem	GAG	T	U	0.00525927	3759.67	8.86524e-05		EBT00051370040	Leu1	T	68	Acc-stem	GAG	0.00463451	5348.67	0
EBT00001514711	LeuU	69	Acc-stem	GAG	C	C	0.00159364	3760	8.86445e-05		EBT00051370040	Leu1	C	69	Acc-stem	GAG	0.00274287	5348.33	6.2321e-05
EBT00001514711	LeuU	70	Acc-stem	GAG	G	G	0.0037572	3760.33	0		EBT00051370040	Leu1	G	70	Acc-stem	GAG	0.00517876	5348.67	0
EBT00001514711	LeuU	71	Acc-stem	GAG	G	G	0.00677905	3760	0		EBT00051370040	Leu1	G	71	Acc-stem	GAG	0.00624293	5348.33	6.2321e-05
EBT00001514711	LeuU	72	Acc-stem	GAG	T	U	0.00577062	3760	0		EBT00051370040	Leu1	T	72	Acc-stem	GAG	0.00491881	5348.67	0
EBT00001514711	LeuU	73	0	GAG	A	A	0.00324367	3759.67	0		EBT00051370040	Leu1	A	73	0	GAG	0.00274544	5348	6.23246e-05
EBT00001514711	LeuU	74	0	GAG	C	C	0.00175108	3759.67	8.86524e-05		EBT00051370040	Leu1	C	74	0	GAG	0.00162791	5348.33	0
EBT00001514711	LeuU	75	0	GAG	C	C	0	3760	0		EBT00051370040	Leu1	C	75	0	GAG	0	4978.67	0
EBT00001514711	LeuU	76	0	GAG	A	A	0	3301.67	0		EBT00051370040	Leu1	A	76	0	GAG	0	4345.33	0
EBT00001514691	IleT	1	Acc-stem	GAU	A	A	0	240	0.00138696		EBT00051370091	Ile1	G	1	Acc-stem	GAU	0	215	0.0271493
EBT00001514691	IleT	2	Acc-stem	GAU	G	G	0	240.333	0		EBT00051370091	Ile1	G	2	Acc-stem	GAU	0	221	0.00150602
EBT00001514691	IleT	3	Acc-stem	GAU	G	G	0.00176367	240.333	0		EBT00051370091	Ile1	G	3	Acc-stem	GAU	0.00123001	221.333	0
EBT00001514691	IleT	4	Acc-stem	GAU	C	C	0	240.333	0		EBT00051370091	Ile1	T	4	Acc-stem	GAU	0.00182149	221.333	0
EBT00001514691	IleT	5	Acc-stem	GAU	T	U	0	240.333	0		EBT00051370091	Ile1	C	5	Acc-stem	GAU	0	221.333	0.003003
EBT00001514691	IleT	6	Acc-stem	GAU	T	U	0.00409467	240.333	0		EBT00051370091	Ile1	T	6	Acc-stem	GAU	0.00280979	222	0
EBT00001514691	IleT	7	Acc-stem	GAU	G	G	0.000856898	240.333	0		EBT00051370091	Ile1	G	7	Acc-stem	GAU	0	222	0.0485714
EBT00001514691	IleT	8	0	GAU	T	U	0.000856898	240.333	0		EBT00051370091	Ile1	T	8	0	GAU	0.00290449	233.333	0
EBT00001514691	IleT	9	0	GAU	A	A	0	240.333	0		EBT00051370091	Ile1	A	9	0	GAU	0	233.333	0
EBT00001514691	IleT	10	D-stem	GAU	G	G	0.000856898	240.333	0		EBT00051370091	Ile1	G	10	D-stem	GAU	0.00376557	233.333	0
EBT00001514691	IleT	11	D-stem	GAU	C	C	0.000856898	240.333	0.0720721		EBT00051370091	Ile1	C	11	D-stem	GAU	0	233.333	0
EBT00001514691	IleT	12	D-stem	GAU	T	U	0.00161421	259	0		EBT00051370091	Ile1	T	12	D-stem	GAU	0.00181159	233.333	0
EBT00001514691	IleT	13	D-stem	GAU	C	C	0.000807103	259	0.0226415		EBT00051370091	Ile1	C	13	D-stem	GAU	0.00181159	233.333	0.020979
EBT00001514691	IleT	14	D-loop	GAU	A	A	0	265	0		EBT00051370091	Ile1	A	14	D-loop	GAU	0.00362319	238.333	0
EBT00001514691	IleT	15	D-loop	GAU	G	G	0	265	0.00125628		EBT00051370091	Ile1	G	15	D-loop	GAU	0	238.333	0.336735
EBT00001514691	IleT	16	D-loop	GAU	G	G	0	265.333	0		EBT00051370091	Ile1	T	16	D-loop	GAU	0.0070483	359.333	0.0110092
EBT00001514691	IleT	17	D-loop	GAU	T	D	0.000771605	265.333	0		EBT00051370091	Ile1	T	17	D-loop	GAU	0	363.333	0.00274474
EBT00001514691	IleT	18	D-loop	GAU	G	G	0.000771605	265.333	0		EBT00051370091	Ile1	G	18	D-loop	GAU	0.00246305	364.333	0.000914077
EBT00001514691	IleT	19	D-loop	GAU	G	G	0	265.333	0.0700935		EBT00051370091	Ile1	G	19	D-loop	GAU	0	364.667	0.783965
EBT00001514691	IleT	20	D-loop	GAU	T	DD	0.00732223	285.333	0.0172216		EBT00051370091	Ile1	T	20	D-loop	GAU	0.00110617	1688	0.0321101
EBT00001514691	IleT	20a	D-loop	GAU	T	DD	0.0051889	290.333	0.0246361		EBT00051370091	Ile1	T	20a	D-loop	GAU	0.000288018	1744	0.0154309
EBT00001514691	IleT	21	D-loop	GAU	A	A	0	297.667	0		EBT00051370091	Ile1	A	21	D-loop	GAU	0.000334001	1771.33	0.00169078
EBT00001514691	IleT	22	D-stem	GAU	G	G	0.0132275	297.667	0		EBT00051370091	Ile1	G	22	D-stem	GAU	0.000614821	1774.33	0.0171713
EBT00001514691	IleT	23	D-stem	GAU	A	A	0	297.667	0		EBT00051370091	Ile1	A	23	D-stem	GAU	0.00305647	1805.33	0.0253734
EBT00001514691	IleT	24	D-stem	GAU	G	G	0.000661376	297.667	0.0165198		EBT00051370091	Ile1	G	24	D-stem	GAU	0.00286596	1852.33	0.0491102
EBT00001514691	IleT	25	D-stem	GAU	C	C	0.00330688	302.667	0.00547645		EBT00051370091	Ile1	C	25	D-stem	GAU	0.00189394	1948	0.00307062
EBT00001514691	IleT	26	0	GAU	G	G	0.00336725	304.333	0		EBT00051370091	Ile1	G	26	0	GAU	0.00129955	1954	0.00946266
EBT00001514691	IleT	27	Ac-Stem	GAU	C	C	0.00198413	304.333	0		EBT00051370091	Ile1	C	27	Ac-stem	GAU	0.00840607	1972.67	0.0037037
EBT00001514691	IleT	28	Ac-Stem	GAU	A	A	0	304.333	0		EBT00051370091	Ile1	A	28	Ac-stem	GAU	0.00200836	1980	0
EBT00001514691	IleT	29	Ac-Stem	GAU	C	C	0.00402863	304.333	0		EBT00051370091	Ile1	C	29	Ac-stem	GAU	0.00123647	1979.67	0.00016835
EBT00001514691	IleT	30	Ac-Stem	GAU	C	C	0.00601275	304.333	0		EBT00051370091	Ile1	C	30	Ac-stem	GAU	0.012383	1980	0.00419111
EBT00001514691	IleT	31	Ac-Stem	GAU	C	C	0.00475038	304.333	0.00218579		EBT00051370091	Ile1	C	31	Ac-stem	GAU	0.00302799	1988.33	0.00566761
EBT00001514691	IleT	32	Ac-loop	GAU	C	C	0.00132275	305	0.00326797		EBT00051370091	Ile1	C	32	Ac-loop	GAU	0.010082	1999.67	0.0074454
EBT00001514691	IleT	33	Ac-loop	GAU	T	U	0.00541538	306	0.117308		EBT00051370091	Ile1	T	33	Ac-loop	GAU	0.00702732	2014.67	0.0161159
EBT00001514691	IleT	34	Ac-loop	GAU	G	G	0.00449339	346.667	0.468846		EBT00051370091	Ile1	G	34	Ac-loop	GAU	0.0017415	2047.67	0.167728
EBT00001514691	IleT	35	Ac-loop	GAU	A	A	0.000730994	652.667	0.385243		EBT00051370091	Ile1	A	35	Ac-loop	GAU	0.00266499	2460.33	0.126199
EBT00001514691	IleT	36	Ac-loop	GAU	T	U	0.000257599	1061.67	0.0711578		EBT00051370091	Ile1	T	36	Ac-loop	GAU	0.00184349	2815.67	0.0467216
EBT00001514691	IleT	37	Ac-loop	GAU	A	ct6A	0.045573	1143	0.606946		EBT00051370091	Ile1	A	37	Ac-loop	GAU	0.0320044	2953.67	0.43811
EBT00001514691	IleT	38	Ac-loop	GAU	A	A	0.0168407	2908	0.231704		EBT00051370091	Ile1	A	38	Ac-loop	GAU	0.0154077	5256.67	0.218572
EBT00001514691	IleT	39	Ac-stem	GAU	G	G	0.00142226	3785	0.00864327		EBT00051370091	Ile1	G	39	Ac-stem	GAU	0.00118112	6727	0.0119945
EBT00001514691	IleT	40	Ac-stem	GAU	G	G	0.00149531	3818	0.00209096		EBT00051370091	Ile1	G	40	Ac-stem	GAU	0.00237968	6808.67	0.0047264
EBT00001514691	IleT	41	Ac-stem	GAU	G	G	0.00276876	3826	0.00208659		EBT00051370091	Ile1	G	41	Ac-stem	GAU	0.00192539	6841	0.00590942
EBT00001514691	IleT	42	Ac-stem	GAU	T	U	0.00429815	3834	0		EBT00051370091	Ile1	T	42	Ac-stem	GAU	0.00527832	6881.67	0
EBT00001514691	IleT	43	Ac-stem	GAU	G	G	0.00255366	3831	0.000608696		EBT00051370091	Ile1	G	43	Ac-stem	GAU	0.00208404	6878.33	0.000919919
EBT00001514691	IleT	44	V-region	GAU	A	A	0.00660935	3833.33	0.00164945		EBT00051370091	Ile1	A	44	V-region	GAU	0.00688149	6884.67	0.00371424
EBT00001514691	IleT	45	V-region	GAU	G	G	0.00165091	3839.67	0.00996992		EBT00051370091	Ile1	G	45	V-region	GAU	0.00185369	6910.33	0.0133264
EBT00001514691	IleT	46	V-region	GAU	G	m7G	0.00659642	3878.33	0.381578		EBT00051370091	Ile1	G	46	V-region	GAU	0.00440694	7003.67	0.51631
EBT00001514691	IleT	47	V-region	GAU	T	acp3U	0.231315	6271.33	0.121703		EBT00051370091	Ile1	T	47	V-region	GAU	0.200274	14479.7	0.111859
EBT00001514691	IleT	48	V-region	GAU	C	C	0.00165289	7140.33	0.0032108		EBT00051370091	Ile1	C	48	V-region	GAU	0.000723954	16303.3	0.00538892
EBT00001514691	IleT	49	T-stem	GAU	G	G	0.00164046	7163.33	0.00366266		EBT00051370091	Ile1	G	49	T-stem	GAU	0.00166686	16391.7	0.0029602
EBT00001514691	IleT	50	T-stem	GAU	G	G	0.00225416	7189.67	0.00125023		EBT00051370091	Ile1	G	50	T-stem	GAU	0.00153807	16440.3	0.00076987
EBT00001514691	IleT	51	T-stem	GAU	T	U	0.0050952	7198.67	0.000185185		EBT00051370091	Ile1	C	51	T-stem	GAU	0.002045	16453	0.00173931
EBT00001514691	IleT	52	T-stem	GAU	G	G	0.00173079	7200	0.000786418		EBT00051370091	Ile1	A	52	T-stem	GAU	0.000801568	16481.7	0.00022242
EBT00001514691	IleT	53	T-stem	GAU	G	G	0.000731	7205.67	0.00689117		EBT00051370091	Ile1	G	53	T-stem	GAU	0.000404572	16485.3	0.00658846
EBT00001514691	IleT	54	T-loop	GAU	T	T	0.000803034	7255.67	0		EBT00051370091	Ile1	T	54	T-loop	GAU	0.00135423	16594.7	0
EBT00001514691	IleT	55	T-loop	GAU	T	Y	0.000480446	7255.67	0		EBT00051370091	Ile1	T	55	T-loop	GAU	0.000928974	16594.7	0
EBT00001514691	IleT	56	T-loop	GAU	C	C	0.000192511	7255.67	0		EBT00051370091	Ile1	C	56	T-loop	GAU	0.000782344	16594.7	0
EBT00001514691	IleT	57	T-loop	GAU	A	A	0.000150704	7255.67	0		EBT00051370091	Ile1	G	57	T-loop	GAU	0.00071005	16594.7	0
EBT00001514691	IleT	58	T-loop	GAU	A	A	0.00032564	7255.67	0		EBT00051370091	Ile1	A	58	T-loop	GAU	0.000193108	16594.7	0
EBT00001514691	IleT	59	T-loop	GAU	G	G	0.000895188	7255.67	0		EBT00051370091	Ile1	A	59	T-loop	GAU	0.000685157	16594.7	0
EBT00001514691	IleT	60	T-loop	GAU	T	U	0.00145021	7255.67	0		EBT00051370091	Ile1	T	60	T-loop	GAU	0.000718754	16594.7	0
EBT00001514691	IleT	61	T-stem	GAU	C	C	0.000966687	7255.67	0		EBT00051370091	Ile1	C	61	T-stem	GAU	0.000249259	16594.7	0
EBT00001514691	IleT	62	T-stem	GAU	C	C	0.00135858	7255.67	0		EBT00051370091	Ile1	T	62	T-stem	GAU	0.00109558	16594.7	0
EBT00001514691	IleT	63	T-stem	GAU	A	A	0.00109676	7255.67	0		EBT00051370091	Ile1	G	63	T-stem	GAU	0.000656134	16594.7	0
EBT00001514691	IleT	64	T-stem	GAU	C	C	0.00072027	7255.33	0		EBT00051370091	Ile1	C	64	T-stem	GAU	0.00127021	16590	0.000281215
EBT00001514691	IleT	65	T-stem	GAU	T	Y	0.00126373	7255.33	4.59412e-05		EBT00051370091	Ile1	C	65	T-stem	GAU	0.00148753	16594.7	0
EBT00001514691	IleT	66	Acc-stem	GAU	C	C	0.000902341	7255.67	0		EBT00051370091	Ile1	C	66	Acc-stem	GAU	0.00171014	16594.7	0
EBT00001514691	IleT	67	Acc-stem	GAU	A	A	0.000428741	7255.67	0		EBT00051370091	Ile1	A	67	Acc-stem	GAU	0.000498518	16594.7	0
EBT00001514691	IleT	68	Acc-stem	GAU	G	G	0.00341832	7255	9.18823e-05		EBT00051370091	Ile1	G	68	Acc-stem	GAU	0.00220564	16594.3	2.00872e-05
EBT00001514691	IleT	69	Acc-stem	GAU	G	G	0.00257991	7255.67	0		EBT00051370091	Ile1	A	69	Acc-stem	GAU	0.0109171	16594.7	0
EBT00001514691	IleT	70	Acc-stem	GAU	C	C	0.00394685	7255	4.59432e-05		EBT00051370091	Ile1	C	70	Acc-stem	GAU	0.00208388	16588.7	0.000321401
EBT00001514691	IleT	71	Acc-stem	GAU	C	C	0.00165425	7255.33	0		EBT00051370091	Ile1	C	71	Acc-stem	GAU	0.00961321	16594	0
EBT00001514691	IleT	72	Acc-stem	GAU	T	U	0.00521558	7255	9.18823e-05		EBT00051370091	Ile1	C	72	Acc-stem	GAU	0.00146541	16593.3	0
EBT00001514691	IleT	73	0	GAU	A	A	0.00203018	7255.67	0		EBT00051370091	Ile1	A	73	0	GAU	0.00390149	16593.3	0
EBT00001514691	IleT	74	0	GAU	C	C	0.00174909	7255.67	0		EBT00051370091	Ile1	C	74	0	GAU	0.000766486	16593	0
EBT00001514691	IleT	75	0	GAU	C	C	0	7255.67	0		EBT00051370091	Ile1	C	75	0	GAU	0	15458	0
EBT00001514691	IleT	76	0	GAU	A	A	0	6338.67	0		EBT00051370091	Ile1	A	76	0	GAU	0	13196	0
EBT00001514638	CysT	1	Acc-stem	GCA	G	G	0	279	0.0199063		EBT00051365422	Cys1	G	1	Acc-stem	GCA	0	272.333	0.00365854
EBT00001514638	CysT	2	Acc-stem	GCA	G	G	0	284.667	0.00116959		EBT00051365422	Cys1	G	2	Acc-stem	GCA	0	273.333	0
EBT00001514638	CysT	3	Acc-stem	GCA	C	C	0	285	0		EBT00051365422	Cys1	C	3	Acc-stem	GCA	0.000886525	273.333	0.0318772
EBT00001514638	CysT	4	Acc-stem	GCA	G	G	0.00238143	285	0		EBT00051365422	Cys1	T	4	Acc-stem	GCA	0.0039098	282.333	0
EBT00001514638	CysT	5	Acc-stem	GCA	C	C	0.00100402	285	0.0261959		EBT00051365422	Cys1	G	5	Acc-stem	GCA	0.000886525	282.333	0
EBT00001514638	CysT	6	Acc-stem	GCA	G	G	0.0130522	292.667	0		EBT00051365422	Cys1	A	6	Acc-stem	GCA	0.00106838	282.333	0
EBT00001514638	CysT	7	Acc-stem	GCA	T	U	0.00338544	292.667	0		EBT00051365422	Cys1	G	7	Acc-stem	GCA	0	282.333	0.0297824
EBT00001514638	CysT	8	0	GCA	T	s4U	0.0930847	292.667	0.0892116		EBT00051365422	Cys1	T	8	0	GCA	0.292397	291	0
EBT00001514638	CysT	9	0	GCA	A	A	0	321.333	0		EBT00051365422	Cys1	A	9	0	GCA	0	291	0
EBT00001514638	CysT	10	D-stem	GCA	A	A	0.00219298	321.333	0		EBT00051365422	Cys1	G	10	D-stem	GCA	0.00286241	291	0.0406593
EBT00001514638	CysT	11	D-stem	GCA	C	C	0.00206963	321.333	0.040796		EBT00051365422	Cys1	C	11	D-stem	GCA	0.00209644	303.333	0.037037
EBT00001514638	CysT	12	D-stem	GCA	A	A	0.00109649	335	0		EBT00051365422	Cys1	A	12	D-stem	GCA	0.000769823	315	0
EBT00001514638	CysT	13	D-stem	GCA	A	A	0	335	0		EBT00051365422	Cys1	G	13	D-stem	GCA	0	315	0.0197095
EBT00001514638	CysT	14	D-loop	GCA	A	A	0.000874891	335	0.0195122		EBT00051365422	Cys1	A	14	D-loop	GCA	0.000737463	321.333	0.0539745
EBT00001514638	CysT	15	D-loop	GCA	G	G	0.00296941	341.667	0		EBT00051365422	Cys1	G	15	D-loop	GCA	0.000944287	339.667	0.146566
EBT00001514638	CysT	16	D-loop	GCA	C	C	0.00620406	341.667	0		EBT00051365422	Cys1	T	16	D-loop	GCA	0.0030644	398	0.017284
EBT00001514638	CysT	18	D-loop	GCA	G	G	0.00104167	341.667	0.0321058		EBT00051365422	Cys1	G	18	D-loop	GCA	0.0017138	405	0.0185784
EBT00001514638	CysT	19	D-loop	GCA	G	G	0.000807103	353	0.0964164		EBT00051365422	Cys1	G	19	D-loop	GCA	0.00217278	412.667	0.506183
EBT00001514638	CysT	20	D-loop	GCA	T	DD	0.00473899	390.667	0.00677966		EBT00051365422	Cys1	T	20	D-loop	GCA	0.0012904	835.667	0.0638536
EBT00001514638	CysT	21	D-loop	GCA	T	DD	0.00422343	393.333	0.00589722		EBT00051365422	Cys1	T	21	D-loop	GCA	0.00104226	892.667	0.0186882
EBT00001514638	CysT	22	D-stem	GCA	A	A	0.0134467	395.667	0.0310204		EBT00051365422	Cys1	A	22	D-stem	GCA	0.00019996	909.667	0.0746016
EBT00001514638	CysT	23	D-stem	GCA	T	U	0.00317261	408.333	0.0160643		EBT00051365422	Cys1	T	23	D-stem	GCA	0.00228962	983	0.00973808
EBT00001514638	CysT	24	D-stem	GCA	G	G	0.000913242	415	0.0333851		EBT00051365422	Cys1	G	24	D-stem	GCA	0.00154321	992.667	0.0309144
EBT00001514638	CysT	25	D-stem	GCA	T	U	0.00329209	429.333	0.000775795		EBT00051365422	Cys1	C	25	D-stem	GCA	0.00340701	1024.33	0.0250635
EBT00001514638	CysT	26	0	GCA	A	A	0	429.667	0		EBT00051365422	Cys1	A	26	0	GCA	0.0011897	1050.67	0.0304522
EBT00001514638	CysT	27	Ac-Stem	GCA	G	G	0.000609385	429.667	0.0167811		EBT00051365422	Cys1	C	27	Ac-stem	GCA	0.00129513	1083.67	0.00763126
EBT00001514638	CysT	28	Ac-Stem	GCA	C	C	0.000597372	437	0		EBT00051365422	Cys1	C	28	Ac-stem	GCA	0.00671045	1092	0.00243605
EBT00001514638	CysT	29	Ac-Stem	GCA	G	G	0.00205385	437	0		EBT00051365422	Cys1	G	29	Ac-stem	GCA	0.00332402	1094.67	0.00303582
EBT00001514638	CysT	30	Ac-Stem	GCA	G	G	0	437	0.00304183		EBT00051365422	Cys1	G	30	Ac-stem	GCA	0.00285016	1098	0.025732
EBT00001514638	CysT	31	Ac-Stem	GCA	A	A	0.000903342	438.333	0		EBT00051365422	Cys1	A	31	Ac-stem	GCA	0.000794938	1127	0.0168654
EBT00001514638	CysT	32	Ac-loop	GCA	T	Y	0.00351033	438.333	0		EBT00051365422	Cys1	T	32	Ac-loop	GCA	0.00423535	1146.33	0.0171478
EBT00001514638	CysT	33	Ac-loop	GCA	T	U	0.00238949	438.333	0.00529501		EBT00051365422	Cys1	T	33	Ac-loop	GCA	0.00461702	1166.33	0
EBT00001514638	CysT	34	Ac-loop	GCA	G	G	0.00479331	440.667	0.118079		EBT00051365422	Cys1	G	34	Ac-loop	GCA	0.0087256	1163	0.0383131
EBT00001514638	CysT	35	Ac-loop	GCA	C	C	0.00316642	499.667	0.213536		EBT00051365422	Cys1	C	35	Ac-loop	GCA	0.00116113	1209.33	0.165401
EBT00001514638	CysT	36	Ac-loop	GCA	A	A	0.000626566	635.333	0.198149		EBT00051365422	Cys1	A	36	Ac-loop	GCA	0.00215713	1449	0.150811
EBT00001514638	CysT	37	Ac-loop	GCA	A	ms2i6A	0.00534135	792.333	0.54568		EBT00051365422	Cys1	A	37	Ac-loop	GCA	0.000765379	1706.33	0.495416
EBT00001514638	CysT	38	Ac-loop	GCA	A	A	0.0297065	1744	0.402535		EBT00051365422	Cys1	A	38	Ac-loop	GCA	0.0150435	3381.67	0.25355
EBT00001514638	CysT	39	Ac-stem	GCA	T	Y	0.00113312	2919	0.0134069		EBT00051365422	Cys1	T	39	Ac-stem	GCA	0.0023603	4530.33	0.0049784
EBT00001514638	CysT	40	Ac-stem	GCA	C	C	0.000886651	2958.67	0.0179243		EBT00051365422	Cys1	C	40	Ac-stem	GCA	0.00167836	4553	0.00813303
EBT00001514638	CysT	41	Ac-stem	GCA	C	C	0.00402403	3012.67	0.00132597		EBT00051365422	Cys1	C	41	Ac-stem	GCA	0.00395381	4590.33	0.00548855
EBT00001514638	CysT	42	Ac-stem	GCA	G	G	0.0135259	3016.67	0.0260439		EBT00051365422	Cys1	G	42	Ac-stem	GCA	0.00206709	4615.67	0.0228636
EBT00001514638	CysT	43	Ac-stem	GCA	T	U	0.0035559	3097.33	0.00268327		EBT00051365422	Cys1	T	43	Ac-stem	GCA	0.00625263	4723.67	0.00147971
EBT00001514638	CysT	44	V-region	GCA	C	C	0.000664807	3105.67	0.0275545		EBT00051365422	Cys1	G	44	V-region	GCA	0.00133424	4730.67	0.0118368
EBT00001514638	CysT	45	V-region	GCA	T	U	0.00307525	3193.67	0		EBT00051365422	Cys1	A	45	V-region	GCA	0.00190822	4787.33	0.0399091
EBT00001514638	CysT	46	V-region	GCA	A	A	0.000407458	3193.67	0.000938478		EBT00051365422	Cys1	A	46	V-region	GCA	0.00248987	4986.33	0.0125421
EBT00001514638	CysT	48	V-region	GCA	G	G	0.0014141	3196.67	0.00570244		EBT00051365422	Cys1	C	48	V-region	GCA	0.00202908	5049.67	0.00707872
EBT00001514638	CysT	49	T-stem	GCA	T	U	0.00488629	3215	0		EBT00051365422	Cys1	G	49	T-stem	GCA	0.0029266	5085.67	0.00163591
EBT00001514638	CysT	50	T-stem	GCA	C	C	0.00256661	3215	0		EBT00051365422	Cys1	C	50	T-stem	GCA	0.00200856	5094	0.00520766
EBT00001514638	CysT	51	T-stem	GCA	C	C	0.00399674	3215	0		EBT00051365422	Cys1	C	51	T-stem	GCA	0.00430775	5120.67	0.000520494
EBT00001514638	CysT	52	T-stem	GCA	G	G	0.00211813	3215	0		EBT00051365422	Cys1	G	52	T-stem	GCA	0.00510475	5123.33	0.000520224
EBT00001514638	CysT	53	T-stem	GCA	G	G	0.00320458	3215	0.00464396		EBT00051365422	Cys1	G	53	T-stem	GCA	0.00316227	5126	0.00337006
EBT00001514638	CysT	54	T-loop	GCA	T	T	0.00438094	3230	0.000103188		EBT00051365422	Cys1	T	54	T-loop	GCA	0.00390642	5143.33	0
EBT00001514638	CysT	55	T-loop	GCA	T	Y	0.00134379	3230.33	0		EBT00051365422	Cys1	T	55	T-loop	GCA	0.00123568	5143.33	0
EBT00001514638	CysT	56	T-loop	GCA	C	C	0.000511717	3230.33	0		EBT00051365422	Cys1	C	56	T-loop	GCA	0.00085821	5143.33	0
EBT00001514638	CysT	57	T-loop	GCA	G	G	0.000128999	3230.33	0		EBT00051365422	Cys1	G	57	T-loop	GCA	0.00100939	5143.33	0
EBT00001514638	CysT	58	T-loop	GCA	A	A	8.23e-05	3230.33	0		EBT00051365422	Cys1	A	58	T-loop	GCA	0.000883058	5143.33	0
EBT00001514638	CysT	59	T-loop	GCA	C	C	0	3230.33	0		EBT00051365422	Cys1	T	59	T-loop	GCA	0.00216557	5143.33	0
EBT00001514638	CysT	60	T-loop	GCA	T	U	0.00107893	3230.33	0		EBT00051365422	Cys1	T	60	T-loop	GCA	0.00398641	5143.33	0
EBT00001514638	CysT	61	T-stem	GCA	C	C	0.00185551	3230.33	0		EBT00051365422	Cys1	C	61	T-stem	GCA	0.00415304	5143.33	0
EBT00001514638	CysT	62	T-stem	GCA	C	C	0.00226693	3230.33	0		EBT00051365422	Cys1	C	62	T-stem	GCA	0.00340584	5143.33	0
EBT00001514638	CysT	63	T-stem	GCA	G	G	0.00191802	3230	0.000103188		EBT00051365422	Cys1	G	63	T-stem	GCA	0.00209554	5143.33	0
EBT00001514638	CysT	64	T-stem	GCA	G	G	0.00129021	3230.33	0		EBT00051365422	Cys1	A	64	T-stem	GCA	0.00595376	5143.33	0
EBT00001514638	CysT	65	T-stem	GCA	A	A	0.00091436	3230.33	0		EBT00051365422	Cys1	C	65	T-stem	GCA	0.00335521	5143.33	0
EBT00001514638	CysT	66	Acc-stem	GCA	A	A	0.00476057	3230.33	0		EBT00051365422	Cys1	C	66	Acc-stem	GCA	0.00314444	5143.33	0
EBT00001514638	CysT	67	Acc-stem	GCA	C	C	0.00148585	3230.33	0		EBT00051365422	Cys1	T	67	Acc-stem	GCA	0.00186652	5143.33	0
EBT00001514638	CysT	68	Acc-stem	GCA	G	G	0.00350402	3230.33	0		EBT00051365422	Cys1	C	68	Acc-stem	GCA	0.00196391	5143.33	0
EBT00001514638	CysT	69	Acc-stem	GCA	C	C	0.00385071	3230.33	0		EBT00051365422	Cys1	A	69	Acc-stem	GCA	0.00271778	5143.33	0
EBT00001514638	CysT	70	Acc-stem	GCA	G	G	0.0028637	3230	0.000103188		EBT00051365422	Cys1	G	70	Acc-stem	GCA	0.00307699	5143.33	0
EBT00001514638	CysT	71	Acc-stem	GCA	C	C	0.001782	3230.33	0		EBT00051365422	Cys1	C	71	Acc-stem	GCA	0.00625166	5143.33	0
EBT00001514638	CysT	72	Acc-stem	GCA	C	C	0.0023384	3230	0.000103188		EBT00051365422	Cys1	C	72	Acc-stem	GCA	0.00319329	5143	6.48087e-05
EBT00001514638	CysT	73	0	GCA	T	U	0.00253799	3230.33	0		EBT00051365422	Cys1	T	73	0	GCA	0.00378116	5143.33	0
EBT00001514638	CysT	74	0	GCA	C	C	0.000449477	3229.67	0		EBT00051365422	Cys1	C	74	0	GCA	0.00138376	5143	0
EBT00001514638	CysT	75	0	GCA	C	C	0	3229.33	0		EBT00051365422	Cys1	C	75	0	GCA	0	4809.33	0
EBT00001514638	CysT	76	0	GCA	A	A	0	2808	0		EBT00051365422	Cys1	A	76	0	GCA	0	3936.67	0
EBT00001514735	GlyV	1	Acc-stem	GCC	G	G	0	2686.33	0.0218473		EBT00051367353	Gly1	G	1	Acc-stem	GCC	0	2234.67	0.0376113
EBT00001514735	GlyV	2	Acc-stem	GCC	C	C	0	2746.33	0.00169635		EBT00051367353	Gly1	C	2	Acc-stem	GCC	0	2322	0.00698503
EBT00001514735	GlyV	3	Acc-stem	GCC	G	G	0.000156055	2751	0.000847458		EBT00051367353	Gly1	G	3	Acc-stem	GCC	0.000417818	2338.33	0.000285022
EBT00001514735	GlyV	4	Acc-stem	GCC	G	G	0.00220582	2753.33	0.000121051		EBT00051367353	Gly1	G	4	Acc-stem	GCC	0.00112862	2339	0
EBT00001514735	GlyV	5	Acc-stem	GCC	G	G	0.000798022	2753.67	0.00373854		EBT00051367353	Gly1	G	5	Acc-stem	GCC	0.00121901	2339	0
EBT00001514735	GlyV	6	Acc-stem	GCC	A	A	0.000155909	2764	0.00420319		EBT00051367353	Gly1	A	6	Acc-stem	GCC	0.000407121	2339	0
EBT00001514735	GlyV	7	Acc-stem	GCC	A	A	0.000715187	2775.67	0.00478069		EBT00051367353	Gly1	A	7	Acc-stem	GCC	0.000452317	2339	0.00425713
EBT00001514735	GlyV	8	0	GCC	T	s4U	0.0396824	2789	0.0181882		EBT00051367353	Gly1	T	8	0	GCC	0.0138295	2349	0.00452041
EBT00001514735	GlyV	9	0	GCC	A	A	0	2840.67	0		EBT00051367353	Gly1	A	9	0	GCC	0.000241284	2359.67	0
EBT00001514735	GlyV	10	D-stem	GCC	G	G	0.000851044	2840.67	0		EBT00051367353	Gly1	G	10	D-stem	GCC	0.00161289	2359.67	0.00407991
EBT00001514735	GlyV	11	D-stem	GCC	C	C	0.00218152	2840.67	0.0127433		EBT00051367353	Gly1	C	11	D-stem	GCC	0.00175775	2369.33	0.0240286
EBT00001514735	GlyV	12	D-stem	GCC	T	U	0.00232764	2877.33	0		EBT00051367353	Gly1	T	12	D-stem	GCC	0.00260598	2427.67	0
EBT00001514735	GlyV	13	D-stem	GCC	C	C	0.00215408	2877.33	0		EBT00051367353	Gly1	C	13	D-stem	GCC	0.00979526	2427.67	0
EBT00001514735	GlyV	14	D-loop	GCC	A	A	0.000316033	2877.33	0		EBT00051367353	Gly1	A	14	D-loop	GCC	0.000278043	2427.67	0.0049187
EBT00001514735	GlyV	15	D-loop	GCC	G	G	0.000396071	2877.33	0.0348837		EBT00051367353	Gly1	G	15	D-loop	GCC	0.00783129	2439.67	0.162969
EBT00001514735	GlyV	16	D-loop	GCC	T	DD	0.00331082	2981.33	0		EBT00051367353	Gly1	T	16	D-loop	GCC	0.00136448	2914.67	0.00557261
EBT00001514735	GlyV	17	D-loop	GCC	T	DD	0.00195467	2981.33	0.00334299		EBT00051367353	Gly1	T	17	D-loop	GCC	0.0026252	2931	0.000227402
EBT00001514735	GlyV	18	D-loop	GCC	G	G	0.00172352	2991.33	0.000111421		EBT00051367353	Gly1	G	18	D-loop	GCC	0.00100661	2931.67	0.00711221
EBT00001514735	GlyV	19	D-loop	GCC	G	G	0.000733776	2991.67	0.0099283		EBT00051367353	Gly1	G	19	D-loop	GCC	0.00322392	2952.67	0.0605579
EBT00001514735	GlyV	20	D-loop	GCC	T	D	0.00220886	3021.67	0.00176192		EBT00051367353	Gly1	T	20	D-loop	GCC	0.00201324	3143	0.00274987
EBT00001514735	GlyV	21	D-loop	GCC	A	A	0.00100545	3027	0.00307388		EBT00051367353	Gly1	A	21	D-loop	GCC	0.000329309	3151.67	0.0158218
EBT00001514735	GlyV	22	D-stem	GCC	G	G	0.000497711	3036.33	0.00262783		EBT00051367353	Gly1	G	22	D-stem	GCC	0.000569837	3202.33	0.000208138
EBT00001514735	GlyV	23	D-stem	GCC	A	A	0.000672043	3044.33	0		EBT00051367353	Gly1	A	23	D-stem	GCC	0.000486479	3203	0
EBT00001514735	GlyV	24	D-stem	GCC	G	G	0.000733986	3044.33	0.00857577		EBT00051367353	Gly1	G	24	D-stem	GCC	0.00105628	3203	0.00978978
EBT00001514735	GlyV	25	D-stem	GCC	C	C	0.0007866	3070.67	0.0137045		EBT00051367353	Gly1	C	25	D-stem	GCC	0.000772294	3234.67	0.0335624
EBT00001514735	GlyV	26	0	GCC	A	A	0.00118553	3113.33	0.00096267		EBT00051367353	Gly1	A	26	0	GCC	0.000737239	3347	0.00446163
EBT00001514735	GlyV	27	Ac-Stem	GCC	C	C	0.00235988	3116.33	0.0033049		EBT00051367353	Gly1	C	27	Ac-stem	GCC	0.00264648	3362	0.0025712
EBT00001514735	GlyV	28	Ac-Stem	GCC	G	G	0.000899843	3126.67	0.0065664		EBT00051367353	Gly1	G	28	Ac-stem	GCC	0.00143013	3370.67	0.0169162
EBT00001514735	GlyV	29	Ac-Stem	GCC	A	A	0.000694985	3147.33	0		EBT00051367353	Gly1	A	29	Ac-stem	GCC	0.000485152	3428.67	0
EBT00001514735	GlyV	30	Ac-Stem	GCC	C	C	0.00188077	3147.33	0.0457807		EBT00051367353	Gly1	C	30	Ac-stem	GCC	0.000534789	3422.67	0.0169459
EBT00001514735	GlyV	31	Ac-Stem	GCC	C	C	0.00133252	3298.33	0.0895289		EBT00051367353	Gly1	C	31	Ac-stem	GCC	0.00371818	3481.67	0.073121
EBT00001514735	GlyV	32	Ac-loop	GCC	T	U	0.00257889	3622.67	0		EBT00051367353	Gly1	T	32	Ac-loop	GCC	0.00420202	3756.33	0
EBT00001514735	GlyV	33	Ac-loop	GCC	T	U	0.00353824	3544	0.0717653		EBT00051367353	Gly1	T	33	Ac-loop	GCC	0.00723162	3644	0.0512064
EBT00001514735	GlyV	34	Ac-loop	GCC	G	G	0.0848942	3818	0.677434		EBT00051367353	Gly1	G	34	Ac-loop	GCC	0.0593402	3840.67	0.615985
EBT00001514735	GlyV	35	Ac-loop	GCC	C	C	0.00325998	11836.3	0.75813		EBT00051367353	Gly1	C	35	Ac-loop	GCC	0.00465704	10001.3	0.743185
EBT00001514735	GlyV	36	Ac-loop	GCC	C	C	0.000120263	48936.7	0.322923		EBT00051367353	Gly1	C	36	Ac-loop	GCC	0.00102124	38943.7	0.317209
EBT00001514735	GlyV	37	Ac-loop	GCC	A	A	8.07e-05	72276.3	0.0987764		EBT00051367353	Gly1	A	37	Ac-loop	GCC	8.58e-05	57036	0.0949157
EBT00001514735	GlyV	38	Ac-loop	GCC	A	A	0.000199739	80198	0.0483284		EBT00051367353	Gly1	A	38	Ac-loop	GCC	0.000231308	63017.3	0.0473282
EBT00001514735	GlyV	39	Ac-stem	GCC	G	G	0.000668483	84270.7	0.00494747		EBT00051367353	Gly1	G	39	Ac-stem	GCC	0.000685991	66148	0.00337492
EBT00001514735	GlyV	40	Ac-stem	GCC	G	G	0.00120323	84689.7	0.00728703		EBT00051367353	Gly1	G	40	Ac-stem	GCC	0.00139171	66372	0.00846052
EBT00001514735	GlyV	41	Ac-stem	GCC	T	U	0.00274465	85311.3	0.000238286		EBT00051367353	Gly1	T	41	Ac-stem	GCC	0.00284632	66938.3	5.47738e-05
EBT00001514735	GlyV	42	Ac-stem	GCC	C	C	0.00167174	85331.7	0		EBT00051367353	Gly1	C	42	Ac-stem	GCC	0.00230148	66942	0
EBT00001514735	GlyV	43	Ac-stem	GCC	G	G	0.00222294	85266.3	0.0010505		EBT00051367353	Gly1	G	43	Ac-stem	GCC	0.00206882	66869.3	0.0018112
EBT00001514735	GlyV	44	V-region	GCC	G	G	0.00176238	85356	0.000854511		EBT00051367353	Gly1	G	44	V-region	GCC	0.00207501	66990.7	0.001297
EBT00001514735	GlyV	45	V-region	GCC	G	G	0.00232247	85429	0.000635601		EBT00051367353	Gly1	G	45	V-region	GCC	0.00245524	67077.7	0.00259718
EBT00001514735	GlyV	46	V-region	GCC	G	m7G	0.00323664	85483.3	0.00493941		EBT00051367353	Gly1	G	46	V-region	GCC	0.00396251	67252.3	0.00663696
EBT00001514735	GlyV	47	V-region	GCC	T	U	0.00473784	85907.7	0.00052742		EBT00051367353	Gly1	T	47	V-region	GCC	0.00462234	67701.7	0.00018706
EBT00001514735	GlyV	48	V-region	GCC	C	C	0.00164961	85953	0.000476777		EBT00051367353	Gly1	C	48	V-region	GCC	0.00174762	67714.3	0.000433005
EBT00001514735	GlyV	49	T-stem	GCC	G	G	0.00220591	85994	0.0010571		EBT00051367353	Gly1	G	49	T-stem	GCC	0.00232642	67743.7	0.00113535
EBT00001514735	GlyV	50	T-stem	GCC	C	C	0.00165813	86085	7.74369e-05		EBT00051367353	Gly1	C	50	T-stem	GCC	0.00172432	67820.7	9.33748e-05
EBT00001514735	GlyV	51	T-stem	GCC	G	G	0.00125192	86091.7	0.000232257		EBT00051367353	Gly1	G	51	T-stem	GCC	0.00131908	67827	0.000270222
EBT00001514735	GlyV	52	T-stem	GCC	A	A	0.000808558	86111.7	3.87079e-05		EBT00051367353	Gly1	A	52	T-stem	GCC	0.000936572	67845.3	0
EBT00001514735	GlyV	53	T-stem	GCC	G	G	0.0015597	86115	0.00225159		EBT00051367353	Gly1	G	53	T-stem	GCC	0.0018763	67845	0.00245056
EBT00001514735	GlyV	54	T-loop	GCC	T	T	0.00235082	86309.3	1.54481e-05		EBT00051367353	Gly1	T	54	T-loop	GCC	0.00251614	68011.7	4.90105e-06
EBT00001514735	GlyV	55	T-loop	GCC	T	Y	0.00068944	86310.7	0		EBT00051367353	Gly1	T	55	T-loop	GCC	0.00075249	68012	0
EBT00001514735	GlyV	56	T-loop	GCC	C	C	0.00325588	86310	0		EBT00051367353	Gly1	C	56	T-loop	GCC	0.0032475	68011.7	4.90105e-06
EBT00001514735	GlyV	57	T-loop	GCC	G	G	0.00163734	86297.7	0		EBT00051367353	Gly1	G	57	T-loop	GCC	0.00188534	68012	0
EBT00001514735	GlyV	58	T-loop	GCC	A	A	0.00140078	86297.7	3.86255e-06		EBT00051367353	Gly1	A	58	T-loop	GCC	0.0013346	68012	0
EBT00001514735	GlyV	59	T-loop	GCC	G	G	0.00427319	86298	0.000131311		EBT00051367353	Gly1	G	59	T-loop	GCC	0.00441973	68012	0
EBT00001514735	GlyV	60	T-loop	GCC	T	U	0.00314124	86309.3	3.86214e-06		EBT00051367353	Gly1	T	60	T-loop	GCC	0.00356529	68011.7	0
EBT00001514735	GlyV	61	T-stem	GCC	C	C	0.00365555	86309.7	0		EBT00051367353	Gly1	C	61	T-stem	GCC	0.00329439	68011.7	0
EBT00001514735	GlyV	62	T-stem	GCC	T	U	0.00775514	86301	0		EBT00051367353	Gly1	T	62	T-stem	GCC	0.00899152	68011.7	0
EBT00001514735	GlyV	63	T-stem	GCC	C	C	0.00507581	86290	3.86289e-06		EBT00051367353	Gly1	C	63	T-stem	GCC	0.00479332	67991	0
EBT00001514735	GlyV	64	T-stem	GCC	G	G	0.00479399	86290.3	0.000177663		EBT00051367353	Gly1	G	64	T-stem	GCC	0.00554547	67989.3	0.000254877
EBT00001514735	GlyV	65	T-stem	GCC	T	U	0.0068436	86305.7	5.02066e-05		EBT00051367353	Gly1	T	65	T-stem	GCC	0.00717073	68006.7	7.84175e-05
EBT00001514735	GlyV	66	Acc-stem	GCC	T	U	0.00541684	86310	0		EBT00051367353	Gly1	T	66	Acc-stem	GCC	0.00626409	68012	0
EBT00001514735	GlyV	67	Acc-stem	GCC	T	U	0.00302524	86309.3	0		EBT00051367353	Gly1	T	67	Acc-stem	GCC	0.00326101	68010.7	0
EBT00001514735	GlyV	68	Acc-stem	GCC	C	C	0.0188434	86293.3	0.000150626		EBT00051367353	Gly1	C	68	Acc-stem	GCC	0.019376	67997.3	0.000166646
EBT00001514735	GlyV	69	Acc-stem	GCC	C	C	0.00621313	86306.3	1.15865e-05		EBT00051367353	Gly1	C	69	Acc-stem	GCC	0.00685533	68008.7	1.47038e-05
EBT00001514735	GlyV	70	Acc-stem	GCC	C	C	0.00562404	86307.3	0		EBT00051367353	Gly1	C	70	Acc-stem	GCC	0.00522483	68009.7	0
EBT00001514735	GlyV	71	Acc-stem	GCC	G	G	0.00820489	86288.7	0.000208559		EBT00051367353	Gly1	G	71	Acc-stem	GCC	0.0102105	67973.7	0.000529337
EBT00001514735	GlyV	72	Acc-stem	GCC	C	C	0.00211685	86306.7	0		EBT00051367353	Gly1	C	72	Acc-stem	GCC	0.00253751	68009.7	0
EBT00001514735	GlyV	73	0	GCC	T	U	0.0146403	86304	1.93112e-05		EBT00051367353	Gly1	T	73	0	GCC	0.0155908	68009.3	0
EBT00001514735	GlyV	74	0	GCC	C	C	0.00738333	86305.7	0		EBT00051367353	Gly1	C	74	0	GCC	0.00695365	68007	0
EBT00001514735	GlyV	75	0	GCC	C	C	0	83234.3	0		EBT00051367353	Gly1	C	75	0	GCC	0	65273	0
EBT00001514735	GlyV	76	0	GCC	A	A	0	69961.7	0		EBT00051367353	Gly1	A	76	0	GCC	0	54096.3	0
EBT00001514690	SerV	1	Acc-stem	GCU	G	G	NA	77	NA		EBT00051366536	Ser1	G	1	Acc-stem	GCU	0	256	0.00130039
EBT00001514690	SerV	2	Acc-stem	GCU	G	G	NA	77	NA		EBT00051366536	Ser1	G	2	Acc-stem	GCU	0	256.333	0.00259403
EBT00001514690	SerV	3	Acc-stem	GCU	T	U	NA	85	NA		EBT00051366536	Ser1	A	3	Acc-stem	GCU	0.0152051	257	0.0950704
EBT00001514690	SerV	4	Acc-stem	GCU	G	G	NA	94	NA		EBT00051366536	Ser1	G	4	Acc-stem	GCU	0.000791766	284	0
EBT00001514690	SerV	5	Acc-stem	GCU	A	A	NA	94	NA		EBT00051366536	Ser1	A	5	Acc-stem	GCU	0	284	0
EBT00001514690	SerV	6	Acc-stem	GCU	G	G	NA	94	NA		EBT00051366536	Ser1	G	6	Acc-stem	GCU	0.00092081	284	0.024055
EBT00001514690	SerV	7	Acc-stem	GCU	G	G	NA	94	NA		EBT00051366536	Ser1	G	7	Acc-stem	GCU	0	291	0
EBT00001514690	SerV	8	0	GCU	T	s4U	0.0909179	103.667	0		EBT00051366536	Ser1	T	8	0	GCU	0.414819	291	0
EBT00001514690	SerV	9	0	GCU	G	G	0.00222222	103.667	0		EBT00051366536	Ser1	G	9	0	GCU	0	291	0
EBT00001514690	SerV	10	D-stem	GCU	G	G	0	103.667	0		EBT00051366536	Ser1	G	10	D-stem	GCU	0.00657156	291	0
EBT00001514690	SerV	11	D-stem	GCU	C	C	0.00724638	103.667	0		EBT00051366536	Ser1	C	11	D-stem	GCU	0.00514338	291	0.0179978
EBT00001514690	SerV	12	D-stem	GCU	C	C	0.00512077	103.667	0.0189274		EBT00051366536	Ser1	C	12	D-stem	GCU	0.00724574	296.333	0
EBT00001514690	SerV	13	D-stem	GCU	G	G	0.00222222	105.667	0		EBT00051366536	Ser1	G	13	D-stem	GCU	0.00392157	296.333	0
EBT00001514690	SerV	14	D-loop	GCU	A	A	0	105.667	0		EBT00051366536	Ser1	A	14	D-loop	GCU	0	296.333	0
EBT00001514690	SerV	15	D-loop	GCU	G	G	0	105.667	0		EBT00051366536	Ser1	G	15	D-loop	GCU	0.000791766	296.333	0
EBT00001514690	SerV	16	D-loop	GCU	A	A	0.103133	105.667	0.0185759		EBT00051366536	Ser1	T	16	D-loop	GCU	0.195862	296.333	0
EBT00001514690	SerV	18	D-loop	GCU	G	G	0.00222222	107.667	0.00308642		EBT00051366536	Ser1	G	18	D-loop	GCU	0.00158353	296.333	0
EBT00001514690	SerV	19	D-loop	GCU	G	G	0	108	0		EBT00051366536	Ser1	G	19	D-loop	GCU	0.00479189	296.333	0
EBT00001514690	SerV	20	D-loop	GCU	C	C	0	108	0.121951		EBT00051366536	Ser1	C	20	D-loop	GCU	0.00392157	296.333	0.0389189
EBT00001514690	SerV	20a	D-loop	GCU	T	D	0.0937761	123	0.0340314		EBT00051366536	Ser1	C	20a	D-loop	GCU	0.196722	308.333	0.0252898
EBT00001514690	SerV	20b	D-loop	GCU	G	G	0.00220751	127.333	0.0567901		EBT00051366536	Ser1	G	20b	D-loop	GCU	0.0015083	316.333	0.0226571
EBT00001514690	SerV	21	D-loop	GCU	A	A	0	135	0.00246305		EBT00051366536	Ser1	A	21	D-loop	GCU	0.00463012	323.667	0
EBT00001514690	SerV	22	D-stem	GCU	A	A	0	135.333	0		EBT00051366536	Ser1	A	22	D-stem	GCU	0.000752445	323.667	0
EBT00001514690	SerV	23	D-stem	GCU	G	G	0	135.333	0		EBT00051366536	Ser1	G	23	D-stem	GCU	0.0395121	323.667	0
EBT00001514690	SerV	24	D-stem	GCU	G	G	0.00203252	135.333	0		EBT00051366536	Ser1	G	24	D-stem	GCU	0.0166965	323.667	0
EBT00001514690	SerV	25	D-stem	GCU	C	C	0	135.333	0		EBT00051366536	Ser1	C	25	D-stem	GCU	0.00463012	323.667	0
EBT00001514690	SerV	26	0	GCU	G	G	0	135.333	0		EBT00051366536	Ser1	G	26	0	GCU	0.000754148	323.667	0
EBT00001514690	SerV	27	Ac-Stem	GCU	C	C	0.008967	135.333	0		EBT00051366536	Ser1	C	27	Ac-stem	GCU	0	323.667	0
EBT00001514690	SerV	28	Ac-Stem	GCU	T	U	0	135.333	0		EBT00051366536	Ser1	T	28	Ac-stem	GCU	0.00613672	323.333	0
EBT00001514690	SerV	29	Ac-Stem	GCU	C	C	0.00191571	135.333	0		EBT00051366536	Ser1	C	29	Ac-stem	GCU	0.000754148	323.333	0.00102987
EBT00001514690	SerV	30	Ac-Stem	GCU	C	C	0.00203252	135.333	0		EBT00051366536	Ser1	C	30	Ac-stem	GCU	0.00387597	323.667	0
EBT00001514690	SerV	31	Ac-Stem	GCU	C	C	0.00203252	135.333	0		EBT00051366536	Ser1	C	31	Ac-stem	GCU	0.00226074	323.667	0.041461
EBT00001514690	SerV	32	Ac-loop	GCU	C	s2C	0	135.333	0		EBT00051366536	Ser1	C	32	Ac-loop	GCU	0.0130584	337.667	0.0799273
EBT00001514690	SerV	33	Ac-loop	GCU	T	U	0.00394823	135.333	0		EBT00051366536	Ser1	T	33	Ac-loop	GCU	0.00479497	367	0.0090009
EBT00001514690	SerV	34	Ac-loop	GCU	G	G	0	135.333	0		EBT00051366536	Ser1	G	34	Ac-loop	GCU	0.000652316	370.333	0.127943
EBT00001514690	SerV	35	Ac-loop	GCU	C	C	0	135.333	0.202358		EBT00051366536	Ser1	C	35	Ac-loop	GCU	0.00736544	424.667	0.434029
EBT00001514690	SerV	36	Ac-loop	GCU	T	U	0.00176367	169.667	0		EBT00051366536	Ser1	T	36	Ac-loop	GCU	0.00176308	750.333	0.0170306
EBT00001514690	SerV	37	Ac-loop	GCU	A	ct6A	0	169.667	0.0894454		EBT00051366536	Ser1	A	37	Ac-loop	GCU	0.000470146	763.333	0.266261
EBT00001514690	SerV	38	Ac-loop	GCU	A	A	0.0015949	186.333	0.28699		EBT00051366536	Ser1	A	38	Ac-loop	GCU	0.00120534	1040.33	0.24174
EBT00001514690	SerV	39	Ac-stem	GCU	G	G	0.001443	261.333	0.010101		EBT00051366536	Ser1	G	39	Ac-stem	GCU	0.00111534	1372	0.012476
EBT00001514690	SerV	40	Ac-stem	GCU	G	G	0.00227842	264	0		EBT00051366536	Ser1	G	40	Ac-stem	GCU	0.0019236	1389.33	0.000719252
EBT00001514690	SerV	41	Ac-stem	GCU	G	G	0.0152654	264	0		EBT00051366536	Ser1	G	41	Ac-stem	GCU	0.00164773	1390.33	0.000479272
EBT00001514690	SerV	42	Ac-stem	GCU	A	A	0	264	0.01		EBT00051366536	Ser1	A	42	Ac-stem	GCU	0.00137323	1391	0.00334368
EBT00001514690	SerV	43	Ac-stem	GCU	G	G	0.00223012	266.667	0.103139		EBT00051366536	Ser1	G	43	Ac-stem	GCU	0.000749183	1395.67	0.0403392
EBT00001514690	SerV	44	V-region	GCU	T	U	0.00496327	297.333	0		EBT00051366536	Ser1	T	44	V-region	GCU	0.00434018	1454.33	0
EBT00001514690	SerV	V1	V-region	GCU	A	A	0	297.333	0.0530786		EBT00051366536	Ser1	A	V1	V-region	GCU	0.00104769	1454.33	0.00885961
EBT00001514690	SerV	V2	V-region	GCU	T	U	0.0929369	314	0		EBT00051366536	Ser1	C	V2	V-region	GCU	0.0319864	1467.33	0.0103417
EBT00001514690	SerV	V3	V-region	GCU	G	G	0.0864539	314	0		EBT00051366536	Ser1	A	V3	V-region	GCU	0.0269445	1482.67	0.000449438
EBT00001514690	SerV	V4	V-region	GCU	C	C	0.00534864	314	0		EBT00051366536	Ser1	C	V4	V-region	GCU	0.000819793	1483.33	0.00224215
EBT00001514690	SerV	V5	V-region	GCU	G	G	0.00314268	280	0.10828		EBT00051366536	Ser1	C	V5	V-region	GCU	0.029016	1486.67	0.0182699
EBT00001514690	SerV	V6	V-region	GCU	G	G	0.0857139	314	0.0407332		EBT00051366536	Ser1	T	V6	V-region	GCU	0.00446361	1514.33	0.00525509
EBT00001514690	SerV	V7	V-region	GCU	T	U	0.00182013	327.333	0		EBT00051366536	NA	NA	NA	NA	GCU	NA	NA	NA
EBT00001514690	SerV	V8	V-region	GCU	C	C	0.00104493	327.333	0.0306022		EBT00051366536	Ser1	C	V8	V-region	GCU	0.000986855	1522.33	0.107834
EBT00001514690	SerV	V9	V-region	GCU	A	A	0	337.667	0.0107422		EBT00051366536	Ser1	A	V9	V-region	GCU	0.00119359	1706.33	0.0502783
EBT00001514690	SerV	V10	V-region	GCU	A	A	0	341.333	0.030303		EBT00051366536	Ser1	A	V10	V-region	GCU	0.000572306	1796.67	0.0839565
EBT00001514690	SerV	V11	V-region	GCU	A	A	0.000693001	352	0.078534		EBT00051366536	Ser1	A	V11	V-region	GCU	0.00136022	1961.33	0.0242123
EBT00001514690	SerV	V12	V-region	GCU	A	A	0.00161127	382	0.00779221		EBT00051366536	Ser1	A	V12	V-region	GCU	0.000205634	2010	0.0153494
EBT00001514690	SerV	V13	V-region	GCU	G	G	0.00749973	385	0.0244932		EBT00051366536	NA	NA	NA	NA	GCU	NA	NA	NA
EBT00001514690	SerV	V14	V-region	GCU	C	C	0.0595177	394.667	0.0721003		EBT00051366536	Ser1	G	V14	V-region	GCU	0.0100488	2041.33	0.0182751
EBT00001514690	SerV	V15	V-region	GCU	T	U	0.0157037	425.333	0		EBT00051366536	Ser1	G	V15	V-region	GCU	0.00652087	2079.33	0.00144069
EBT00001514690	SerV	V16	V-region	GCU	G	G	0.00204385	425.333	0		EBT00051366536	Ser1	G	V16	V-region	GCU	0.0185629	2082.33	0.00604614
EBT00001514690	SerV	V17	V-region	GCU	C	C	0.0299872	398.667	0.0260586		EBT00051366536	Ser1	T	V17	V-region	GCU	0.008589	2095	0.000318117
EBT00001514690	SerV	V18	V-region	GCU	A	A	0.0168835	409.333	0.0773854		EBT00051366536	Ser1	G	V18	V-region	GCU	0.00693657	2095.67	0.059114
EBT00001514690	SerV	V19	V-region	GCU	T	U	0.00158436	443.667	0		EBT00051366536	Ser1	T	V19	V-region	GCU	0.00397059	2227.33	0
EBT00001514690	SerV	48	V-region	GCU	C	C	0.00312046	443.667	0.000750751		EBT00051366536	Ser1	C	48	V-region	GCU	0.0109583	2220	0.0134795
EBT00001514690	SerV	49	T-stem	GCU	C	C	0.0644919	444	0		EBT00051366536	Ser1	G	49	T-stem	GCU	0.0197467	2250.33	0.000148105
EBT00001514690	SerV	50	T-stem	GCU	G	G	0.00737254	444	0		EBT00051366536	Ser1	G	50	T-stem	GCU	0.00349596	2250.67	0
EBT00001514690	SerV	51	T-stem	GCU	G	G	0.00366037	444	0		EBT00051366536	Ser1	G	51	T-stem	GCU	0.00336663	2250.67	0
EBT00001514690	SerV	52	T-stem	GCU	G	G	0.0110026	444	0		EBT00051366536	Ser1	G	52	T-stem	GCU	0.00491604	2250.67	0.000148082
EBT00001514690	SerV	53	T-stem	GCU	G	G	0.00374247	444	0		EBT00051366536	Ser1	G	53	T-stem	GCU	0.0035613	2251	0.00354139
EBT00001514690	SerV	54	T-loop	GCU	T	T	0.00903899	444	0		EBT00051366536	Ser1	T	54	T-loop	GCU	0.00768807	2259	0
EBT00001514690	SerV	55	T-loop	GCU	T	Y	0.0021278	444	0		EBT00051366536	Ser1	T	55	T-loop	GCU	0.00280967	2259	0
EBT00001514690	SerV	56	T-loop	GCU	C	C	0.00435919	444	0		EBT00051366536	Ser1	C	56	T-loop	GCU	0.00134092	2258.67	0
EBT00001514690	SerV	57	T-loop	GCU	G	G	0.00229885	444	0		EBT00051366536	Ser1	G	57	T-loop	GCU	0.000990462	2258.67	0
EBT00001514690	SerV	58	T-loop	GCU	A	A	0.000595238	444	0		EBT00051366536	Ser1	A	58	T-loop	GCU	0.0026098	2258.67	0
EBT00001514690	SerV	59	T-loop	GCU	A	A	0.00297619	444	0		EBT00051366536	Ser1	A	59	T-loop	GCU	0.00348482	2258.67	0
EBT00001514690	SerV	60	T-loop	GCU	T	U	0.003935	444	0		EBT00051366536	Ser1	T	60	T-loop	GCU	0.00423421	2258.33	0
EBT00001514690	SerV	61	T-stem	GCU	C	C	0.00472276	443.667	0.000750751		EBT00051366536	Ser1	C	61	T-stem	GCU	0.00519385	2250	0.00383707
EBT00001514690	SerV	62	T-stem	GCU	C	C	0.0082424	444	0		EBT00051366536	Ser1	C	62	T-stem	GCU	0.00672416	2258.67	0.000147558
EBT00001514690	SerV	63	T-stem	GCU	C	C	0.00432888	444	0		EBT00051366536	Ser1	C	63	T-stem	GCU	0.00611418	2259	0
EBT00001514690	SerV	64	T-stem	GCU	C	C	0.00119048	444	0		EBT00051366536	Ser1	C	64	T-stem	GCU	0.00461682	2259	0
EBT00001514690	SerV	65	T-stem	GCU	G	G	0.0688473	443.667	0.000750751		EBT00051366536	Ser1	C	65	T-stem	GCU	0.0242385	2258.33	0.00014758
EBT00001514690	SerV	66	Acc-stem	GCU	C	C	0.00098912	444	0		EBT00051366536	Ser1	C	66	Acc-stem	GCU	0.00659167	2258.67	0.000147558
EBT00001514690	SerV	67	Acc-stem	GCU	C	C	0.00119048	444	0		EBT00051366536	Ser1	C	67	Acc-stem	GCU	0.00688695	2259	0
EBT00001514690	SerV	68	Acc-stem	GCU	T	U	0.00348933	444	0		EBT00051366536	Ser1	T	68	Acc-stem	GCU	0.0126024	2259	0
EBT00001514690	SerV	69	Acc-stem	GCU	C	C	0.0017554	444	0		EBT00051366536	Ser1	C	69	Acc-stem	GCU	0.000802887	2259	0
EBT00001514690	SerV	70	Acc-stem	GCU	A	A	0.0666715	444	0		EBT00051366536	Ser1	T	70	Acc-stem	GCU	0.0740699	2259	0
EBT00001514690	SerV	71	Acc-stem	GCU	C	C	0.00294588	444	0		EBT00051366536	Ser1	C	71	Acc-stem	GCU	0.00219671	2259	0
EBT00001514690	SerV	72	Acc-stem	GCU	C	C	0.00490264	444	0		EBT00051366536	Ser1	C	72	Acc-stem	GCU	0.00584588	2259	0
EBT00001514690	SerV	73	0	GCU	G	G	0.0205928	444	0		EBT00051366536	Ser1	G	73	0	GCU	0.0071857	2258.67	0
EBT00001514690	SerV	74	0	GCU	C	C	0.000766284	444	0		EBT00051366536	Ser1	C	74	0	GCU	0.00178188	2258.67	0
EBT00001514690	SerV	75	0	GCU	C	C	0	444	0		EBT00051366536	Ser1	C	75	0	GCU	0	1921.67	0
EBT00001514690	SerV	76	0	GCU	A	A	0	364.667	0		EBT00051366536	Ser1	A	76	0	GCU	0	1613.67	0
EBT00001514678	SerW	1	Acc-stem	GGA	G	G	0	138.333	0		EBT00051368683	Ser1	G	1	Acc-stem	GGA	0	129.333	0
EBT00001514678	SerW	2	Acc-stem	GGA	G	G	0	138.333	0		EBT00051368683	Ser1	G	2	Acc-stem	GGA	0	129.333	0
EBT00001514678	SerW	3	Acc-stem	GGA	T	U	0.00724723	138.333	0.00479616		EBT00051368683	Ser1	T	3	Acc-stem	GGA	0.00294985	129.333	0
EBT00001514678	SerW	4	Acc-stem	GGA	G	G	0	139	0		EBT00051368683	Ser1	G	4	Acc-stem	GGA	0.0648968	129.333	0
EBT00001514678	SerW	5	Acc-stem	GGA	A	A	0	139	0		EBT00051368683	Ser1	A	5	Acc-stem	GGA	0.0030303	129.333	0
EBT00001514678	SerW	6	Acc-stem	GGA	G	G	0	139	0		EBT00051368683	Ser1	G	6	Acc-stem	GGA	0	129.333	0
EBT00001514678	SerW	7	Acc-stem	GGA	G	G	0.0218579	139	0		EBT00051368683	Ser1	G	7	Acc-stem	GGA	0.103245	129.333	0.02267
EBT00001514678	SerW	8	0	GGA	T	s4U	0.309886	139	0		EBT00051368683	Ser1	T	8	0	GGA	0.242174	132.333	0
EBT00001514678	SerW	9	0	GGA	G	G	0	139	0.0544218		EBT00051368683	Ser1	G	9	0	GGA	0.0508426	132.333	0.0614657
EBT00001514678	SerW	10	D-stem	GGA	T	U	0.00566319	147	0		EBT00051368683	Ser1	T	10	D-stem	GGA	0.00191571	141	0
EBT00001514678	SerW	11	D-stem	GGA	C	C	0.0038417	147	0		EBT00051368683	Ser1	C	11	D-stem	GGA	0	141	0
EBT00001514678	SerW	12	D-stem	GGA	C	C	0.00182149	147	0		EBT00051368683	Ser1	C	12	D-stem	GGA	0.0030303	141	0
EBT00001514678	SerW	13	D-stem	GGA	G	G	0	147	0		EBT00051368683	Ser1	G	13	D-stem	GGA	0.00239808	141	0
EBT00001514678	SerW	14	D-loop	GGA	A	A	0	147	0		EBT00051368683	Ser1	A	14	D-loop	GGA	0.00383142	141	0
EBT00001514678	SerW	15	D-loop	GGA	G	G	0.00182149	147	0.0556745		EBT00051368683	Ser1	G	15	D-loop	GGA	0	141	0
EBT00001514678	SerW	16	D-loop	GGA	T	U	0.00182149	155.667	0		EBT00051368683	Ser1	T	16	D-loop	GGA	0.00239808	141	0
EBT00001514678	SerW	18	D-loop	GGA	G	Gm	0.00182149	155.667	0		EBT00051368683	Ser1	G	18	D-loop	GGA	0.0030303	141	0
EBT00001514678	SerW	19	D-loop	GGA	G	G	0.0034904	155.667	0		EBT00051368683	Ser1	G	19	D-loop	GGA	0.00542839	141	0.0579065
EBT00001514678	SerW	20	D-loop	GGA	C	DD	0.218332	155.667	0		EBT00051368683	Ser1	T	20	D-loop	GGA	0.584737	149.667	0
EBT00001514678	SerW	20a	D-loop	GGA	T	DD	0.00356669	155.667	0.00638298		EBT00051368683	Ser1	T	20a	D-loop	GGA	0.00431379	149.667	0.0302376
EBT00001514678	SerW	20b	D-loop	GGA	G	G	0.00364299	156.667	0.0208333		EBT00051368683	Ser1	G	20b	D-loop	GGA	0.00839516	154.333	0
EBT00001514678	SerW	21	D-loop	GGA	A	A	0	160	0.002079		EBT00051368683	Ser1	A	21	D-loop	GGA	0	154.333	0
EBT00001514678	SerW	22	D-stem	GGA	A	A	0	160.333	0.00207469		EBT00051368683	Ser1	A	22	D-stem	GGA	0.00239808	154.333	0
EBT00001514678	SerW	23	D-stem	GGA	G	G	0.00182149	160.667	0		EBT00051368683	Ser1	G	23	D-stem	GGA	0	154.333	0
EBT00001514678	SerW	24	D-stem	GGA	G	G	0.00161812	160.667	0		EBT00051368683	Ser1	G	24	D-stem	GGA	0	154.333	0
EBT00001514678	SerW	25	D-stem	GGA	A	A	0.00526111	160.667	0		EBT00051368683	Ser1	A	25	D-stem	GGA	0.0070922	154.333	0
EBT00001514678	SerW	26	0	GGA	G	G	0.00161812	160.667	0		EBT00051368683	Ser1	G	26	0	GGA	0	154.333	0
EBT00001514678	SerW	27	Ac-Stem	GGA	C	C	0	160.667	0		EBT00051368683	Ser1	C	27	Ac-stem	GGA	0.00239808	154.333	0.00643777
EBT00001514678	SerW	28	Ac-Stem	GGA	A	A	0.00505774	160.667	0		EBT00051368683	Ser1	A	28	Ac-stem	GGA	0.0017452	155.333	0
EBT00001514678	SerW	29	Ac-Stem	GGA	C	C	0.00364299	160.667	0		EBT00051368683	Ser1	C	29	Ac-stem	GGA	0.00239808	155.333	0
EBT00001514678	SerW	30	Ac-Stem	GGA	G	G	0.0089041	160.667	0		EBT00051368683	Ser1	G	30	Ac-stem	GGA	0.0034904	155.333	0
EBT00001514678	SerW	31	Ac-Stem	GGA	C	C	0	160.667	0		EBT00051368683	Ser1	C	31	Ac-stem	GGA	0	155.333	0
EBT00001514678	SerW	32	Ac-loop	GGA	C	C	0.00904871	160.667	0		EBT00051368683	Ser1	C	32	Ac-loop	GGA	0	155.333	0.0210084
EBT00001514678	SerW	33	Ac-loop	GGA	T	U	0	160.667	0		EBT00051368683	Ser1	T	33	Ac-loop	GGA	0.0121999	158.667	0
EBT00001514678	SerW	34	Ac-loop	GGA	G	G	0.00323625	160.667	0		EBT00051368683	Ser1	G	34	Ac-loop	GGA	0.0017452	158.333	0.00210084
EBT00001514678	SerW	35	Ac-loop	GGA	G	G	0.00343962	160.667	0.0340681		EBT00051368683	Ser1	G	35	Ac-loop	GGA	0.0017452	158.667	0.0205761
EBT00001514678	SerW	36	Ac-loop	GGA	A	A	0.00341024	166.333	0.343421		EBT00051368683	Ser1	A	36	Ac-loop	GGA	0	162	0.141343
EBT00001514678	SerW	37	Ac-loop	GGA	A	A	0	253.333	0.0865385		EBT00051368683	Ser1	A	37	Ac-loop	GGA	0	188.667	0.227831
EBT00001514678	SerW	38	Ac-loop	GGA	A	A	0.00554448	277.333	0.55027		EBT00051368683	Ser1	A	38	Ac-loop	GGA	0.00221484	244.333	0.454207
EBT00001514678	SerW	39	Ac-stem	GGA	G	G	0	616.667	0.00484131		EBT00051368683	Ser1	G	39	Ac-stem	GGA	0	447.667	0.0400286
EBT00001514678	SerW	40	Ac-stem	GGA	T	Y	0.00431293	619.667	0.00958977		EBT00051368683	Ser1	T	40	Ac-stem	GGA	0.00281141	466.333	0.00142755
EBT00001514678	SerW	41	Ac-stem	GGA	G	G	0.00231488	625.667	0.00792812		EBT00051368683	Ser1	G	41	Ac-stem	GGA	0	467	0.0264072
EBT00001514678	SerW	42	Ac-stem	GGA	T	U	0.00474286	630.667	0.00682415		EBT00051368683	Ser1	T	42	Ac-stem	GGA	0.005418	479.667	0.0224185
EBT00001514678	SerW	43	Ac-stem	GGA	G	G	0.0011043	635	0.0606509		EBT00051368683	Ser1	G	43	Ac-stem	GGA	0.0165412	490.667	0.126928
EBT00001514678	SerW	44	V-region	GGA	T	U	0	676	0.0131387		EBT00051368683	Ser1	T	44	V-region	GGA	0.00231215	562	0.0197674
EBT00001514678	SerW	V1	V-region	GGA	A	A	0.00048804	685	0.031574		EBT00051368683	Ser1	A	V1	V-region	GGA	0.00272585	573.333	0.00347625
EBT00001514678	SerW	V2	V-region	GGA	T	U	0.00621257	707.333	0		EBT00051368683	Ser1	T	V2	V-region	GGA	0.00899682	575.333	0.00576037
EBT00001514678	SerW	V3	V-region	GGA	A	A	0.00037793	707.333	0.00047103		EBT00051368683	Ser1	A	V3	V-region	GGA	0.00181528	578.667	0
EBT00001514678	SerW	V4	V-region	GGA	C	C	0.00084025	707.667	0		EBT00051368683	Ser1	C	V4	V-region	GGA	0.00267996	578.667	0
EBT00001514678	SerW	V5	V-region	GGA	G	G	0.00444383	707.667	0.0070159		EBT00051368683	Ser1	G	V5	V-region	GGA	0.00253365	578	0.00115207
EBT00001514678	NA	NA	NA	NA	NA	NA	NA	NA	NA		EBT00051368683	Ser1	G	V6	V-region	GGA	0.00224762	578.667	0
EBT00001514678	SerW	V8	V-region	GGA	G	G	0.0028648	712.667	0.0286233		EBT00051368683	Ser1	G	V8	V-region	GGA	0.153027	578.667	0.00969766
EBT00001514678	SerW	V9	V-region	GGA	C	C	0.0571463	733.667	0		EBT00051368683	Ser1	A	V9	V-region	GGA	0	584.333	0
EBT00001514678	SerW	V10	V-region	GGA	A	A	0	733.667	0.0325275		EBT00051368683	Ser1	A	V10	V-region	GGA	0.00151319	584.333	0
EBT00001514678	SerW	V11	V-region	GGA	A	A	0.00158219	758.333	0.0189737		EBT00051368683	Ser1	A	V11	V-region	GGA	0.00135302	498	0.00598802
EBT00001514678	NA	NA	NA	NA	NA	NA	NA	NA	NA		EBT00051368683	Ser1	C	V14	V-region	GGA	0.00074571	501	0.147476
EBT00001514678	SerW	V15	V-region	GGA	C	C	0.0019663	773	0.0194503		EBT00051368683	Ser1	C	V15	V-region	GGA	0.00663918	587.667	0
EBT00001514678	SerW	V16	V-region	GGA	G	G	0.00101729	788.333	0.0456013		EBT00051368683	Ser1	G	V16	V-region	GGA	0.00376524	587.667	0.00955056
EBT00001514678	SerW	V17	V-region	GGA	T	U	0.00263829	826	0.00760913		EBT00051368683	Ser1	T	V17	V-region	GGA	0.00640913	593.333	0.00503074
EBT00001514678	SerW	V18	V-region	GGA	A	A	0.0119892	832.333	0.160954		EBT00051368683	Ser1	A	V18	V-region	GGA	0.00106076	596.333	0.0234716
EBT00001514678	SerW	V19	V-region	GGA	T	U	0.00118031	992	0.00334896		EBT00051368683	Ser1	T	V19	V-region	GGA	0.00326155	610.667	0.011333
EBT00001514678	SerW	48	V-region	GGA	C	C	0.00373213	995.333	0.00433478		EBT00051368683	Ser1	C	48	V-region	GGA	0.00272483	617.667	0.0550739
EBT00001514678	SerW	49	T-stem	GGA	G	G	0.0190081	999.667	0		EBT00051368683	Ser1	G	49	T-stem	GGA	0.00599078	653.667	0.0130851
EBT00001514678	SerW	50	T-stem	GGA	G	G	0.0403837	999.667	0		EBT00051368683	Ser1	A	50	T-stem	GGA	0.136101	662.333	0.00100553
EBT00001514678	SerW	51	T-stem	GGA	G	G	0.00295058	999.667	0		EBT00051368683	Ser1	G	51	T-stem	GGA	0.00306304	663	0
EBT00001514678	SerW	52	T-stem	GGA	G	G	0.00354868	999.667	0		EBT00051368683	Ser1	G	52	T-stem	GGA	0.00487353	663	0
EBT00001514678	SerW	53	T-stem	GGA	G	G	0.00322999	999.667	0.00199667		EBT00051368683	Ser1	G	53	T-stem	GGA	0.00689253	663	0.00150602
EBT00001514678	SerW	54	T-loop	GGA	T	T	0.00548184	1001.67	0		EBT00051368683	Ser1	T	54	T-loop	GGA	0.00823866	664	0
EBT00001514678	SerW	55	T-loop	GGA	T	Y	0.00288737	1001.67	0		EBT00051368683	Ser1	T	55	T-loop	GGA	0.00457984	664	0
EBT00001514678	SerW	56	T-loop	GGA	C	C	0.00163113	1001.67	0		EBT00051368683	Ser1	C	56	T-loop	GGA	0.00181752	664	0
EBT00001514678	SerW	57	T-loop	GGA	G	G	0.00027941	1001.67	0		EBT00051368683	Ser1	G	57	T-loop	GGA	0.00100577	664	0
EBT00001514678	SerW	58	T-loop	GGA	A	A	0.00104049	1001.67	0		EBT00051368683	Ser1	A	58	T-loop	GGA	0.00316783	664	0
EBT00001514678	SerW	59	T-loop	GGA	A	A	0.00204914	1001.67	0		EBT00051368683	Ser1	A	59	T-loop	GGA	0.00280433	664	0
EBT00001514678	SerW	60	T-loop	GGA	T	U	0.00413231	1001.67	0		EBT00051368683	Ser1	T	60	T-loop	GGA	0.00610038	664	0
EBT00001514678	SerW	61	T-stem	GGA	C	C	0.00219352	999	0.00266223		EBT00051368683	Ser1	C	61	T-stem	GGA	0.00434382	664	0
EBT00001514678	SerW	62	T-stem	GGA	C	C	0.00580656	1001.67	0		EBT00051368683	Ser1	C	62	T-stem	GGA	0.0107222	664	0
EBT00001514678	SerW	63	T-stem	GGA	C	C	0.00548184	1001.67	0		EBT00051368683	Ser1	C	63	T-stem	GGA	0.00224755	664	0
EBT00001514678	SerW	64	T-stem	GGA	C	C	0.0401346	1001.67	0		EBT00051368683	Ser1	T	64	T-stem	GGA	0.139116	664	0
EBT00001514678	SerW	65	T-stem	GGA	C	C	0.00502934	1001.67	0		EBT00051368683	Ser1	C	65	T-stem	GGA	0.010896	663.667	0.000502008
EBT00001514678	SerW	66	Acc-stem	GGA	C	C	0.00298285	1001.67	0		EBT00051368683	Ser1	C	66	Acc-stem	GGA	0.00173277	664	0
EBT00001514678	SerW	67	Acc-stem	GGA	C	C	0.00277839	1001.67	0		EBT00051368683	Ser1	C	67	Acc-stem	GGA	0.00293181	664	0
EBT00001514678	SerW	68	Acc-stem	GGA	T	U	0.00340087	1001.67	0		EBT00051368683	Ser1	T	68	Acc-stem	GGA	0.00841371	664	0
EBT00001514678	SerW	69	Acc-stem	GGA	C	C	0.00225141	1001.67	0		EBT00051368683	Ser1	C	69	Acc-stem	GGA	0.00325331	664	0
EBT00001514678	SerW	70	Acc-stem	GGA	A	A	0.153154	1001.67	0		EBT00051368683	Ser1	A	70	Acc-stem	GGA	0.00381009	664	0
EBT00001514678	SerW	71	Acc-stem	GGA	C	C	0.00340423	1001.33	0.00033278		EBT00051368683	Ser1	C	71	Acc-stem	GGA	0.00229029	664	0
EBT00001514678	SerW	72	Acc-stem	GGA	C	C	0.00706074	1001.67	0		EBT00051368683	Ser1	C	72	Acc-stem	GGA	0.00462258	664	0
EBT00001514678	SerW	73	0	GGA	G	G	0.00693389	1001	0.00033289		EBT00051368683	Ser1	G	73	0	GGA	0.00899171	663.667	0.000502008
EBT00001514678	SerW	74	0	GGA	C	C	0.00145897	1001.33	0.00033278		EBT00051368683	Ser1	C	74	0	GGA	0.00160529	664	0
EBT00001514678	SerW	75	0	GGA	C	C	0	1001.67	0		EBT00051368683	Ser1	C	75	0	GGA	0	560.667	0
EBT00001514678	SerW	76	0	GGA	A	A	0	817	0		EBT00051368683	Ser1	A	76	0	GGA	0	466.667	0
EBT00001514749	AlaW	1	Acc-stem	GGC	G	G	0	104	0.00952381		EBT00051366465	Ala1	G	1	Acc-stem	GGC	0	679	0.00924124
EBT00001514749	AlaW	2	Acc-stem	GGC	G	G	0	105	0.00630915		EBT00051366465	Ala1	G	2	Acc-stem	GGC	0	685.333	0.00387597
EBT00001514749	AlaW	3	Acc-stem	GGC	G	G	0.0015015	105.667	0.00314465		EBT00051366465	Ala1	G	3	Acc-stem	GGC	0	688	0.00145138
EBT00001514749	AlaW	4	Acc-stem	GGC	G	G	0.0225974	106	0		EBT00051366465	Ala1	G	4	Acc-stem	GGC	0.00043122	689	0
EBT00001514749	AlaW	5	Acc-stem	GGC	C	C	0.0392157	106	0.280543		EBT00051366465	Ala1	C	5	Acc-stem	GGC	0.00328494	689	0.0561644
EBT00001514749	AlaW	6	Acc-stem	GGC	T	U	0.0154829	147.333	0		EBT00051366465	Ala1	T	6	Acc-stem	GGC	0.0013334	730	0.0188172
EBT00001514749	AlaW	7	Acc-stem	GGC	A	A	0.00130719	147.333	0.0494624		EBT00051366465	Ala1	A	7	Acc-stem	GGC	0.00089916	744	0
EBT00001514749	AlaW	8	0	GGC	T	U	0.438513	155	0.339489		EBT00051366465	Ala1	T	8	0	GGC	0.0968548	744	0.0844955
EBT00001514749	AlaW	9	0	GGC	A	A	0	234.667	0		EBT00051366465	Ala1	A	9	0	GGC	0.00035881	812.667	0
EBT00001514749	AlaW	10	D-stem	GGC	G	G	0.00641668	234.667	0.0208623		EBT00051366465	Ala1	G	10	D-stem	GGC	0.00212626	812.667	0
EBT00001514749	AlaW	11	D-stem	GGC	C	C	0.0223029	239.667	0.112346		EBT00051366465	Ala1	C	11	D-stem	GGC	0.00326905	812.667	0.0506231
EBT00001514749	AlaW	12	D-stem	GGC	T	U	0.00528426	270	0		EBT00051366465	Ala1	T	12	D-stem	GGC	0.00409403	856	0
EBT00001514749	AlaW	13	D-stem	GGC	C	C	0.00695595	270	0.0252708		EBT00051366465	Ala1	C	13	D-stem	GGC	0.00416949	856	0
EBT00001514749	AlaW	14	D-loop	GGC	A	A	0.00246914	277	0		EBT00051366465	Ala1	A	14	D-loop	GGC	0.00116007	856	0
EBT00001514749	AlaW	15	D-loop	GGC	G	G	0.00398774	277	0.0314685		EBT00051366465	Ala1	G	15	D-loop	GGC	0.00123244	856	0.0678766
EBT00001514749	AlaW	16	D-loop	GGC	C	C	0.00519482	286	0.157171		EBT00051366465	Ala1	C	16	D-loop	GGC	0.00141703	918.333	0.264941
EBT00001514749	AlaW	17	D-loop	GGC	T	D	0.010907	339.333	0.0116505		EBT00051366465	Ala1	T	17	D-loop	GGC	0.00314962	1249.33	0.0198745
EBT00001514749	AlaW	18	D-loop	GGC	G	G	0.00416912	343.333	0		EBT00051366465	Ala1	G	18	D-loop	GGC	0.00258658	1274.67	0.0182285
EBT00001514749	AlaW	19	D-loop	GGC	G	G	0.00378788	343.333	0.102005		EBT00051366465	Ala1	G	19	D-loop	GGC	0.00228325	1298.33	0.232512
EBT00001514749	AlaW	20	D-loop	GGC	G	G	0.00648342	382.333	0.0417711		EBT00051366465	Ala1	G	20	D-loop	GGC	0.00223938	1691.67	0.0952041
EBT00001514749	AlaW	21	D-loop	GGC	A	A	0.00192678	399	0.0462151		EBT00051366465	Ala1	A	21	D-loop	GGC	0.00106017	1869.67	0.071665
EBT00001514749	AlaW	22	D-stem	GGC	G	G	0.001221	418.333	0		EBT00051366465	Ala1	G	22	D-stem	GGC	0.00192822	2014	0.0067401
EBT00001514749	AlaW	23	D-stem	GGC	A	A	0.00070622	418.333	0		EBT00051366465	Ala1	A	23	D-stem	GGC	0.00142924	2027.67	0.000328674
EBT00001514749	AlaW	24	D-stem	GGC	G	G	0.00211268	418.333	0		EBT00051366465	Ala1	G	24	D-stem	GGC	0.00190657	2028.33	0.0083116
EBT00001514749	AlaW	25	D-stem	GGC	C	C	0.00211268	418.333	0.00554675		EBT00051366465	Ala1	C	25	D-stem	GGC	0.00375517	2045.33	0.00178949
EBT00001514749	AlaW	26	0	GGC	G	G	0	420.667	0.00941915		EBT00051366465	Ala1	G	26	0	GGC	0.00207215	2049	0.00485673
EBT00001514749	AlaW	27	Ac-Stem	GGC	C	C	0.00070622	424.667	0.00234926		EBT00051366465	Ala1	C	27	Ac-stem	GGC	0.00784723	2059	0.0105718
EBT00001514749	AlaW	28	Ac-Stem	GGC	T	U	0.00140647	425.667	0		EBT00051366465	Ala1	T	28	Ac-stem	GGC	0.00990208	2081	0.000160152
EBT00001514749	AlaW	29	Ac-Stem	GGC	T	U	0.00058997	425.667	0		EBT00051366465	Ala1	T	29	Ac-stem	GGC	0.00972039	2081.33	0
EBT00001514749	AlaW	30	Ac-Stem	GGC	G	G	0.00058997	425.667	0.00622568		EBT00051366465	Ala1	G	30	Ac-stem	GGC	0.00224549	2081.33	0
EBT00001514749	AlaW	31	Ac-Stem	GGC	C	C	0	428.333	0.0701881		EBT00051366465	Ala1	C	31	Ac-stem	GGC	0.00254102	2076.67	0.0415385
EBT00001514749	AlaW	32	Ac-loop	GGC	A	A	0.00193951	460.667	0.130818		EBT00051366465	Ala1	A	32	Ac-loop	GGC	0.00763334	2166.67	0.0891256
EBT00001514749	AlaW	33	Ac-loop	GGC	T	U	0.00154239	530	0.0322581		EBT00051366465	Ala1	T	33	Ac-loop	GGC	0.00409685	2378.67	0
EBT00001514749	AlaW	34	Ac-loop	GGC	G	G	0.00254068	547.667	0.144716		EBT00051366465	Ala1	G	34	Ac-loop	GGC	0.012065	2368.33	0.109872
EBT00001514749	AlaW	35	Ac-loop	GGC	G	G	0.0125731	640.333	0.820417		EBT00051366465	Ala1	G	35	Ac-loop	GGC	0.00840966	2660.67	0.781602
EBT00001514749	AlaW	36	Ac-loop	GGC	C	C	0.00037252	3565.67	0.48894		EBT00051366465	Ala1	C	36	Ac-loop	GGC	0.00048907	12182.7	0.536986
EBT00001514749	AlaW	37	Ac-loop	GGC	A	A	0.00014354	6977	0.0923637		EBT00051366465	Ala1	A	37	Ac-loop	GGC	0.00035027	26311.7	0.0682508
EBT00001514749	AlaW	38	Ac-loop	GGC	T	U	0.00117328	7687	0.0243273		EBT00051366465	Ala1	T	38	Ac-loop	GGC	0.00130627	28239	0.0171928
EBT00001514749	AlaW	39	Ac-stem	GGC	G	G	0.00200267	7878.67	0.0252794		EBT00051366465	Ala1	G	39	Ac-stem	GGC	0.00225628	28733	0.0183688
EBT00001514749	AlaW	40	Ac-stem	GGC	C	C	0.00254955	8083	0.0102045		EBT00051366465	Ala1	C	40	Ac-stem	GGC	0.00391363	29270.7	0.0103571
EBT00001514749	AlaW	41	Ac-stem	GGC	A	A	0.00141148	8166.33	0.0031737		EBT00051366465	Ala1	A	41	Ac-stem	GGC	0.00141414	29577	0.00221528
EBT00001514749	AlaW	42	Ac-stem	GGC	A	A	0.00213689	8192.33	0.00162489		EBT00051366465	Ala1	A	42	Ac-stem	GGC	0.00120732	29642.7	0.000269808
EBT00001514749	AlaW	43	Ac-stem	GGC	G	G	0.00270851	8205.67	0.00601631		EBT00051366465	Ala1	G	43	Ac-stem	GGC	0.00261217	29650.7	0.00620063
EBT00001514749	AlaW	44	V-region	GGC	A	A	0.00071339	8255.33	0		EBT00051366465	Ala1	A	44	V-region	GGC	0.00068671	29835.7	0.00126088
EBT00001514749	AlaW	45	V-region	GGC	G	G	0.00197314	8253.67	0.00153232		EBT00051366465	Ala1	G	45	V-region	GGC	0.00242831	29873.3	0.00135945
EBT00001514749	AlaW	46	V-region	GGC	G	m7G	0.00410309	8266.33	0.0129751		EBT00051366465	Ala1	G	46	V-region	GGC	0.0066774	29914	0.012272
EBT00001514749	AlaW	47	V-region	GGC	T	U	0.00636226	8375	0.00023875		EBT00051366465	Ala1	T	47	V-region	GGC	0.00595012	30285.7	0.000154062
EBT00001514749	AlaW	48	V-region	GGC	C	C	0.00201985	8377	0.00348943		EBT00051366465	Ala1	C	48	V-region	GGC	0.00258667	30290.3	0.000527942
EBT00001514749	AlaW	49	T-stem	GGC	A	A	0.0372526	8406.33	0.00106948		EBT00051366465	Ala1	G	49	T-stem	GGC	0.00893896	30306.3	0.0110943
EBT00001514749	AlaW	50	T-stem	GGC	G	G	0.0379199	8415.33	0		EBT00051366465	Ala1	A	50	T-stem	GGC	0.00802536	30646.3	0.000652181
EBT00001514749	AlaW	51	T-stem	GGC	C	C	0.00310669	8415.33	7.92e-05		EBT00051366465	Ala1	C	51	T-stem	GGC	0.00243283	30666.3	0.000108687
EBT00001514749	AlaW	52	T-stem	GGC	G	G	0.00250403	8416	0.00035634		EBT00051366465	Ala1	G	52	T-stem	GGC	0.00318189	30669.7	0.000206458
EBT00001514749	AlaW	53	T-stem	GGC	G	G	0.00195728	8419	0.00378653		EBT00051366465	Ala1	G	53	T-stem	GGC	0.00180993	30676	0.0039613
EBT00001514749	AlaW	54	T-loop	GGC	T	T	0.00368458	8451	0		EBT00051366465	Ala1	T	54	T-loop	GGC	0.00420722	30798	1.0822e-05
EBT00001514749	AlaW	55	T-loop	GGC	T	Y	0.00165846	8451	0		EBT00051366465	Ala1	T	55	T-loop	GGC	0.0021775	30798.3	0
EBT00001514749	AlaW	56	T-loop	GGC	C	C	0.00096981	8451	0		EBT00051366465	Ala1	C	56	T-loop	GGC	0.00049652	30798.3	0
EBT00001514749	AlaW	57	T-loop	GGC	G	G	0.00095471	8451	0		EBT00051366465	Ala1	G	57	T-loop	GGC	0.00134969	30793.3	0.000162346
EBT00001514749	AlaW	58	T-loop	GGC	A	A	0.00143893	8451	0		EBT00051366465	Ala1	A	58	T-loop	GGC	0.00211174	30798.3	0
EBT00001514749	AlaW	59	T-loop	GGC	T	U	0.00270732	8451	0		EBT00051366465	Ala1	T	59	T-loop	GGC	0.00385451	30797.7	0
EBT00001514749	AlaW	60	T-loop	GGC	C	C	0.00405018	8448.67	0.0002761		EBT00051366465	Ala1	C	60	T-loop	GGC	0.00513612	30793.3	0.000162346
EBT00001514749	AlaW	61	T-stem	GGC	C	C	0.00602468	8451	0		EBT00051366465	Ala1	C	61	T-stem	GGC	0.00520555	30798.3	0
EBT00001514749	AlaW	62	T-stem	GGC	C	C	0.00385939	8451	0		EBT00051366465	Ala1	C	62	T-stem	GGC	0.00505883	30798	0
EBT00001514749	AlaW	63	T-stem	GGC	G	G	0.00275656	8451	0		EBT00051366465	Ala1	G	63	T-stem	GGC	0.00306597	30794.3	0
EBT00001514749	AlaW	64	T-stem	GGC	C	C	0.0384652	8451	0		EBT00051366465	Ala1	T	64	T-stem	GGC	0.0111141	30792	0
EBT00001514749	AlaW	65	T-stem	GGC	T	U	0.0388704	8449.67	0.00015777		EBT00051366465	Ala1	C	65	T-stem	GGC	0.00674993	30792	0.000183998
EBT00001514749	AlaW	66	Acc-stem	GGC	T	U	0.00575683	8451	0		EBT00051366465	Ala1	T	66	Acc-stem	GGC	0.0069102	30797.7	0
EBT00001514749	AlaW	67	Acc-stem	GGC	A	A	0.00081426	8450.67	0		EBT00051366465	Ala1	A	67	Acc-stem	GGC	0.00101443	30797.3	0
EBT00001514749	AlaW	68	Acc-stem	GGC	G	G	0.00409757	8450.67	3.94e-05		EBT00051366465	Ala1	G	68	Acc-stem	GGC	0.00462155	30796.7	0
EBT00001514749	AlaW	69	Acc-stem	GGC	C	C	0.00431634	8451	0		EBT00051366465	Ala1	C	69	Acc-stem	GGC	0.00335612	30796	0
EBT00001514749	AlaW	70	Acc-stem	GGC	T	U	0.00380295	8450.67	0		EBT00051366465	Ala1	T	70	Acc-stem	GGC	0.00379353	30795.7	0
EBT00001514749	AlaW	71	Acc-stem	GGC	C	C	0.00589644	8449.67	0.00015777		EBT00051366465	Ala1	C	71	Acc-stem	GGC	0.00743291	30792.3	6.4947e-05
EBT00001514749	AlaW	72	Acc-stem	GGC	C	C	0.00389361	8451	0		EBT00051366465	Ala1	C	72	Acc-stem	GGC	0.00336159	30794.3	0
EBT00001514749	AlaW	73	0	GGC	A	A	0.00642821	8450.67	0		EBT00051366465	Ala1	A	73	0	GGC	0.00500867	30793	9.74152e-05
EBT00001514749	AlaW	74	0	GGC	C	C	0.00108776	8450.33	0		EBT00051366465	Ala1	C	74	0	GGC	0.00147668	30796	0
EBT00001514749	AlaW	75	0	GGC	C	C	0	8450	0		EBT00051366465	Ala1	C	75	0	GGC	0	28493	0
EBT00001514749	AlaW	76	0	GGC	A	A	0	7080.33	0		EBT00051366465	Ala1	A	76	0	GGC	0	23599.3	0
EBT00001514632	ProL	1	Acc-stem	GGG	C	C	0	242.333	0.00137363		EBT00051369841	Pro1	C	1	Acc-stem	GGG	0	229.333	0.00289855
EBT00001514632	ProL	2	Acc-stem	GGG	G	G	0	242.667	0.00137174		EBT00051369841	Pro1	G	2	Acc-stem	GGG	0	230	0.00144718
EBT00001514632	ProL	3	Acc-stem	GGG	G	G	0	243	0.00136986		EBT00051369841	Pro1	G	3	Acc-stem	GGG	0.00152207	230.333	0
EBT00001514632	ProL	4	Acc-stem	GGG	C	C	0	243.333	0		EBT00051369841	Pro1	G	4	Acc-stem	GGG	0.00286519	230.333	0
EBT00001514632	ProL	5	Acc-stem	GGG	A	A	0.00249351	243.333	0		EBT00051369841	Pro1	G	5	Acc-stem	GGG	0.00286519	230.333	0
EBT00001514632	ProL	6	Acc-stem	GGG	C	C	0.00114943	243.333	0		EBT00051369841	Pro1	C	6	Acc-stem	GGG	0.00126263	230.333	0
EBT00001514632	ProL	7	Acc-stem	GGG	G	G	0.00134409	243.333	0.0188172		EBT00051369841	Pro1	G	7	Acc-stem	GGG	0.00152207	230.333	0.0955497
EBT00001514632	ProL	8	0	GGG	T	U	0.107211	248	0		EBT00051369841	Pro1	T	8	0	GGG	0.262493	254.667	0
EBT00001514632	ProL	9	0	GGG	A	A	0.00134409	248	0		EBT00051369841	Pro1	A	9	0	GGG	0.00264004	254.667	0
EBT00001514632	ProL	10	D-stem	GGG	G	G	0.0028326	248	0		EBT00051369841	Pro1	G	10	D-stem	GGG	0	254.667	0
EBT00001514632	ProL	11	D-stem	GGG	C	C	0.00109649	248	0		EBT00051369841	Pro1	C	11	D-stem	GGG	0.00264004	254.667	0
EBT00001514632	ProL	12	D-stem	GGG	G	G	0	248	0		EBT00051369841	Pro1	G	12	D-stem	GGG	0.00258398	254.667	0
EBT00001514632	ProL	13	D-stem	GGG	C	C	0	248	0		EBT00051369841	Pro1	C	13	D-stem	GGG	0.00264004	254.667	0
EBT00001514632	ProL	14	D-loop	GGG	A	A	0	248	0		EBT00051369841	Pro1	A	14	D-loop	GGG	0.00528007	254.667	0
EBT00001514632	ProL	15	D-loop	GGG	G	G	0	248	0.0362694		EBT00051369841	Pro1	G	15	D-loop	GGG	0.00129199	254.667	0
EBT00001514632	ProL	16	D-loop	GGG	C	C	0.00173611	257.333	0.00129366		EBT00051369841	Pro1	C	16	D-loop	GGG	0	254.667	0
EBT00001514632	ProL	17	D-loop	GGG	C	C	0	257.667	0		EBT00051369841	Pro1	C	17	D-loop	GGG	0.00137741	254.667	0
EBT00001514632	ProL	17a	D-loop	GGG	T	U	0.00328947	257.667	0		EBT00051369841	Pro1	T	17a	D-loop	GGG	0.00384661	254.667	0
EBT00001514632	ProL	18	D-loop	GGG	G	G	0.00109649	257.667	0		EBT00051369841	Pro1	G	18	D-loop	GGG	0.00396139	254.667	0
EBT00001514632	ProL	19	D-loop	GGG	G	G	0.00240674	257.667	0.0252207		EBT00051369841	Pro1	G	19	D-loop	GGG	0.00381724	254.667	0.17316
EBT00001514632	ProL	20	D-loop	GGG	T	T	0.00205761	264.333	0		EBT00051369841	Pro1	T	20	D-loop	GGG	0.00246016	308	0
EBT00001514632	ProL	21	D-loop	GGG	A	A	0	264.333	0		EBT00051369841	Pro1	A	21	D-loop	GGG	0.002442	308	0.00538213
EBT00001514632	ProL	22	D-stem	GGG	G	G	0.00102881	264.333	0.0136816		EBT00051369841	Pro1	G	22	D-stem	GGG	0.00086133	309.667	0.0700701
EBT00001514632	ProL	23	D-stem	GGG	C	C	0.00962696	268	0		EBT00051369841	Pro1	C	23	D-stem	GGG	0.00276123	333	0.0272639
EBT00001514632	ProL	24	D-stem	GGG	G	G	0.00205761	268	0		EBT00051369841	Pro1	G	24	D-stem	GGG	0.00265107	342.333	0
EBT00001514632	ProL	25	D-stem	GGG	C	C	0	268	0		EBT00051369841	Pro1	C	25	D-stem	GGG	0.008577	342.333	0.0134486
EBT00001514632	ProL	26	0	GGG	A	A	0.00102881	268	0		EBT00051369841	Pro1	A	26	0	GGG	0.00183797	347	0.011396
EBT00001514632	ProL	27	Ac-stem	GGG	C	C	0	268	0		EBT00051369841	Pro1	C	27	Ac-stem	GGG	0.00071685	351	0.00754006
EBT00001514632	ProL	28	Ac-stem	GGG	C	C	0.00223218	268	0		EBT00051369841	Pro1	T	28	Ac-stem	GGG	0.00405188	353.667	0
EBT00001514632	ProL	29	Ac-stem	GGG	G	G	0.00387421	268	0.0462634		EBT00051369841	Pro1	T	29	Ac-stem	GGG	0.00869088	353.667	0
EBT00001514632	ProL	30	Ac-stem	GGG	T	U	0.00332501	281	0		EBT00051369841	Pro1	G	30	Ac-stem	GGG	0.0029661	353.667	0
EBT00001514632	ProL	31	Ac-stem	GGG	C	C	0.00091827	281	0.0581006		EBT00051369841	Pro1	C	31	Ac-stem	GGG	0.00259106	353.333	0
EBT00001514632	ProL	32	Ac-loop	GGG	A	A	0	298.333	0.00111607		EBT00051369841	Pro1	A	32	Ac-loop	GGG	0.00251704	353.333	0.0398551
EBT00001514632	ProL	33	Ac-loop	GGG	T	U	0.00466175	298.667	0		EBT00051369841	Pro1	T	33	Ac-loop	GGG	0.00415175	368	0
EBT00001514632	ProL	34	Ac-loop	GGG	G	G	0.00517314	252.333	0.15419		EBT00051369841	Pro1	G	34	Ac-loop	GGG	0.00446945	349.333	0.0733864
EBT00001514632	ProL	35	Ac-loop	GGG	G	G	0.00257385	298.333	0		EBT00051369841	Pro1	G	35	Ac-loop	GGG	0.00521578	377	0
EBT00001514632	ProL	36	Ac-loop	GGG	G	G	0.00088889	298.333	0.0121413		EBT00051369841	Pro1	G	36	Ac-loop	GGG	0.00345327	377	0
EBT00001514632	ProL	37	Ac-loop	GGG	G	m1G	0.422182	302	0.548805		EBT00051369841	Pro1	G	37	Ac-loop	GGG	0.413546	369.333	0.707806
EBT00001514632	ProL	38	Ac-loop	GGG	T	U	0.0197547	669.333	0.131863		EBT00051369841	Pro1	T	38	Ac-loop	GGG	0.00175791	1264	0.109023
EBT00001514632	ProL	39	Ac-stem	GGG	G	G	0.00046361	771	0.321104		EBT00051369841	Pro1	G	39	Ac-stem	GGG	0.00130836	1418.67	0.0379747
EBT00001514632	ProL	40	Ac-stem	GGG	T	U	0.00147318	1135.67	0.00087977		EBT00051369841	Pro1	C	40	Ac-stem	GGG	0.00204825	1474.67	0.0384699
EBT00001514632	ProL	41	Ac-stem	GGG	C	C	0.00057143	1136.67	0.00058617		EBT00051369841	Pro1	A	41	Ac-stem	GGG	0.0001651	1533.67	0.0216883
EBT00001514632	ProL	42	Ac-stem	GGG	G	G	0.00090728	1137.33	0.00553775		EBT00051369841	Pro1	A	42	Ac-stem	GGG	0.00070373	1567.67	0.00864249
EBT00001514632	ProL	43	Ac-stem	GGG	G	G	0.00236653	1143.67	0.00406386		EBT00051369841	Pro1	G	43	Ac-stem	GGG	0.00170606	1581.33	0.0288639
EBT00001514632	ProL	44	V-region	GGG	G	G	0.00351747	1148.33	0		EBT00051369841	Pro1	G	44	V-region	GGG	0.00335793	1628.33	0.0121335
EBT00001514632	ProL	45	V-region	GGG	G	G	0.00342085	1148.33	0		EBT00051369841	Pro1	G	45	V-region	GGG	0.00485494	1648.33	0.0176798
EBT00001514632	ProL	46	V-region	GGG	G	G	0.00536976	1148.33	0.0109101		EBT00051369841	Pro1	G	46	V-region	GGG	0.00441279	1678	0.0604703
EBT00001514632	ProL	47	V-region	GGG	T	U	0.00371667	1161	0		EBT00051369841	Pro1	T	47	V-region	GGG	0.00631408	1786	0
EBT00001514632	ProL	48	V-region	GGG	C	C	0.0121601	1161	0		EBT00051369841	Pro1	C	48	V-region	GGG	0.00189192	1786	0.0101607
EBT00001514632	ProL	49	T-stem	GGG	G	G	0.0198835	1161	0		EBT00051369841	Pro1	G	49	T-stem	GGG	0.0024436	1804.33	0.0025797
EBT00001514632	ProL	50	T-stem	GGG	G	G	0.0023272	1161	0		EBT00051369841	Pro1	A	50	T-stem	GGG	0.00142024	1809	0
EBT00001514632	ProL	51	T-stem	GGG	A	A	0.00032425	1161	0		EBT00051369841	Pro1	G	51	T-stem	GGG	0.00080482	1809	0.00147194
EBT00001514632	ProL	52	T-stem	GGG	G	G	0.00097627	1161	0		EBT00051369841	Pro1	T	52	T-stem	GGG	0.00549924	1811.67	0
EBT00001514632	ProL	53	T-stem	GGG	G	G	0.00143988	1161	0.00599315		EBT00051369841	Pro1	G	53	T-stem	GGG	0.00230701	1811.67	0.00821168
EBT00001514632	ProL	54	T-loop	GGG	T	U	0.00309575	1168	0		EBT00051369841	Pro1	T	54	T-loop	GGG	0.00214848	1826.67	0
EBT00001514632	ProL	55	T-loop	GGG	T	U	0.00110891	1168	0		EBT00051369841	Pro1	T	55	T-loop	GGG	0.00076787	1826.67	0
EBT00001514632	ProL	56	T-loop	GGG	C	C	0	1168	0		EBT00051369841	Pro1	C	56	T-loop	GGG	0.00224915	1826.67	0
EBT00001514632	ProL	57	T-loop	GGG	A	A	0.00032584	1167	0.00085616		EBT00051369841	Pro1	G	57	T-loop	GGG	0.0031182	1826.67	0
EBT00001514632	ProL	58	T-loop	GGG	A	A	0.00055525	1168	0		EBT00051369841	Pro1	A	58	T-loop	GGG	0.00023793	1826.67	0
EBT00001514632	ProL	59	T-loop	GGG	A	A	0.00273494	1168	0		EBT00051369841	Pro1	A	59	T-loop	GGG	0.00257263	1826.67	0
EBT00001514632	ProL	60	T-loop	GGG	T	U	0.00313389	1168	0		EBT00051369841	Pro1	T	60	T-loop	GGG	0.00231243	1826.67	0
EBT00001514632	ProL	61	T-stem	GGG	C	C	0.00253955	1167.67	0.00028539		EBT00051369841	Pro1	C	61	T-stem	GGG	0.00177366	1826.67	0
EBT00001514632	ProL	62	T-stem	GGG	C	C	0.00387724	1168	0		EBT00051369841	Pro1	A	62	T-stem	GGG	0.00246719	1826.67	0
EBT00001514632	ProL	63	T-stem	GGG	T	U	0.0032886	1168	0		EBT00051369841	Pro1	C	63	T-stem	GGG	0.00084677	1826.33	0.000182485
EBT00001514632	ProL	64	T-stem	GGG	C	C	0.00045882	1168	0		EBT00051369841	Pro1	T	64	T-stem	GGG	0.00469884	1826.67	0
EBT00001514632	ProL	65	T-stem	GGG	T	U	0.00716426	1168	0		EBT00051369841	Pro1	C	65	T-stem	GGG	0.00535208	1826.67	0
EBT00001514632	ProL	66	Acc-stem	GGG	C	C	0.00347829	1168	0		EBT00051369841	Pro1	C	66	Acc-stem	GGG	0.00572691	1826.67	0
EBT00001514632	ProL	67	Acc-stem	GGG	G	G	0.00850892	1168	0		EBT00051369841	Pro1	G	67	Acc-stem	GGG	0.00403164	1826.67	0
EBT00001514632	ProL	68	Acc-stem	GGG	T	U	0.0131822	1167.67	0.00028539		EBT00051369841	Pro1	T	68	Acc-stem	GGG	0.00775723	1826	0.000182513
EBT00001514632	ProL	69	Acc-stem	GGG	G	G	0.00250078	1168	0		EBT00051369841	Pro1	C	69	Acc-stem	GGG	0.00248974	1826.33	0
EBT00001514632	ProL	70	Acc-stem	GGG	C	C	0.00351643	1168	0		EBT00051369841	Pro1	C	70	Acc-stem	GGG	0.00607845	1826.33	0.000182485
EBT00001514632	ProL	71	Acc-stem	GGG	C	C	0.00489606	1168	0		EBT00051369841	Pro1	C	71	Acc-stem	GGG	0.00460649	1826.67	0
EBT00001514632	ProL	72	Acc-stem	GGG	G	G	0.0098038	1168	0		EBT00051369841	Pro1	G	72	Acc-stem	GGG	0.00684083	1826.33	0
EBT00001514632	ProL	73	0	GGG	A	A	0.00860725	1167.67	0.00028539		EBT00051369841	Pro1	A	73	0	GGG	0.00601665	1826.33	0.000182485
EBT00001514632	ProL	74	0	GGG	C	C	0.00055367	1168	0		EBT00051369841	Pro1	C	74	0	GGG	0.00087331	1826.67	0
EBT00001514632	ProL	75	0	GGG	C	C	0	1168	0		EBT00051369841	Pro1	C	75	0	GGG	0	1747	0
EBT00001514632	ProL	76	0	GGG	A	A	0	1033	0		EBT00051369841	Pro1	A	76	0	GGG	0	1455.33	0
EBT00001514707	ThrT	1	Acc-stem	GGU	G	G	NA	7.66667	NA		EBT00051369609	Thr1	G	1	Acc-stem	GGT	0	182.667	0.0402802
EBT00001514707	ThrT	2	Acc-stem	GGU	C	C	NA	7.66667	NA		EBT00051369609	Thr1	C	2	Acc-stem	GGT	0	190.333	0
EBT00001514707	ThrT	3	Acc-stem	GGU	T	U	NA	7.66667	NA		EBT00051369609	Thr1	T	3	Acc-stem	GGT	0	190.333	0
EBT00001514707	ThrT	4	Acc-stem	GGU	G	G	NA	7.66667	NA		EBT00051369609	Thr1	C	4	Acc-stem	GGT	0.00775194	190.333	0.0239316
EBT00001514707	ThrT	5	Acc-stem	GGU	A	A	NA	9.66667	NA		EBT00051369609	Thr1	A	5	Acc-stem	GGT	0.000983284	195	0
EBT00001514707	ThrT	6	Acc-stem	GGU	T	U	NA	10	NA		EBT00051369609	Thr1	T	6	Acc-stem	GGT	0.00262532	195	0
EBT00001514707	ThrT	7	Acc-stem	GGU	A	A	NA	10.3333	NA		EBT00051369609	Thr1	G	7	Acc-stem	GGT	0.00971851	195	0.0346535
EBT00001514707	ThrT	8	0	GGU	T	U	NA	10.3333	NA		EBT00051369609	Thr1	T	8	0	GGT	0.00256796	202	0
EBT00001514707	ThrT	9	0	GGU	A	A	NA	10.3333	NA		EBT00051369609	Thr1	A	9	0	GGT	0	202	0
EBT00001514707	ThrT	10	D-stem	GGU	G	G	NA	10.3333	NA		EBT00051369609	Thr1	G	10	D-stem	GGT	0.000925926	202	0
EBT00001514707	ThrT	11	D-stem	GGU	C	C	NA	10.3333	NA		EBT00051369609	Thr1	C	11	D-stem	GGT	0.000925926	202	0.0304
EBT00001514707	ThrT	12	D-stem	GGU	T	U	NA	10.3333	NA		EBT00051369609	Thr1	T	12	D-stem	GGT	0	208.333	0.00159744
EBT00001514707	ThrT	13	D-stem	GGU	C	C	NA	10.3333	NA		EBT00051369609	Thr1	C	13	D-stem	GGT	0.000925926	208.667	0.0309598
EBT00001514707	ThrT	14	D-loop	GGU	A	A	NA	10.6667	NA		EBT00051369609	Thr1	A	14	D-loop	GGT	0	215.333	0
EBT00001514707	ThrT	15	D-loop	GGU	G	G	NA	10.6667	NA		EBT00051369609	Thr1	G	15	D-loop	GGT	0.00750995	215.333	0.774991
EBT00001514707	ThrT	16	D-loop	GGU	T	DD	NA	16.6667	NA		EBT00051369609	Thr1	T	16	D-loop	GGT	0.00130732	957	0.0287551
EBT00001514707	ThrT	17	D-loop	GGU	T	DD	NA	16.6667	NA		EBT00051369609	Thr1	T	17	D-loop	GGT	0.00299066	985.333	0.0159787
EBT00001514707	ThrT	18	D-loop	GGU	G	G	NA	16.6667	NA		EBT00051369609	Thr1	G	18	D-loop	GGT	0.00152348	1001.33	0.0173373
EBT00001514707	ThrT	19	D-loop	GGU	G	G	NA	16.6667	NA		EBT00051369609	Thr1	G	19	D-loop	GGT	0.00175542	1019	0.276963
EBT00001514707	ThrT	20	D-loop	GGU	T	D	NA	30.3333	NA		EBT00051369609	Thr1	T	20	D-loop	GGT	0.00162075	1409.33	0.00377003
EBT00001514707	ThrT	21	D-loop	GGU	A	A	NA	30.6667	NA		EBT00051369609	Thr1	A	21	D-loop	GGT	0.000886431	1414.67	0.00352195
EBT00001514707	ThrT	22	D-stem	GGU	G	G	NA	30.6667	NA		EBT00051369609	Thr1	G	22	D-stem	GGT	0.00131099	1419.67	0.00861266
EBT00001514707	ThrT	23	D-stem	GGU	A	A	NA	30.6667	NA		EBT00051369609	Thr1	A	23	D-stem	GGT	0.00108089	1432	0.00301694
EBT00001514707	ThrT	24	D-stem	GGU	G	G	NA	30.6667	NA		EBT00051369609	Thr1	G	24	D-stem	GGT	0.00120509	1436.33	0.00369942
EBT00001514707	ThrT	25	D-stem	GGU	C	C	NA	30.6667	NA		EBT00051369609	Thr1	C	25	D-stem	GGT	0.0012843	1441.67	0.00848235
EBT00001514707	ThrT	26	0	GGU	G	G	NA	30.6667	NA		EBT00051369609	Thr1	A	26	0	GGT	0.000826698	1454	0
EBT00001514707	ThrT	27	Ac-Stem	GGU	C	C	NA	31	NA		EBT00051369609	Thr1	C	27	Ac-stem	GGT	0.00130689	1454	0.00297143
EBT00001514707	ThrT	28	Ac-Stem	GGU	A	A	NA	40.6667	NA		EBT00051369609	Thr1	A	28	Ac-stem	GGT	0.000344947	1458.33	0
EBT00001514707	ThrT	29	Ac-Stem	GGU	C	C	NA	40.6667	NA		EBT00051369609	Thr1	C	29	Ac-stem	GGT	0.00224237	1458.33	0.00182523
EBT00001514707	ThrT	30	Ac-Stem	GGU	C	C	NA	40.6667	NA		EBT00051369609	Thr1	C	30	Ac-stem	GGT	0.00793097	1461	0.00881954
EBT00001514707	ThrT	31	Ac-Stem	GGU	C	C	NA	64.3333	NA		EBT00051369609	Thr1	C	31	Ac-stem	GGT	0.00202781	1474	0.253671
EBT00001514707	ThrT	32	Ac-loop	GGU	T	U	0.000435666	4179.33	0.0913176		EBT00051369609	Thr1	T	32	Ac-loop	GGT	0.00344504	1975	0.036742
EBT00001514707	ThrT	33	Ac-loop	GGU	T	U	0.000822359	4599.33	0.00526278		EBT00051369609	Thr1	T	33	Ac-loop	GGT	0.00527847	2050.33	0.00485358
EBT00001514707	ThrT	34	Ac-loop	GGU	G	G	0.000992863	4623.67	0.0163109		EBT00051369609	Thr1	G	34	Ac-loop	GGT	0.00232665	2060.33	0.00418882
EBT00001514707	ThrT	35	Ac-loop	GGU	G	G	0.000943483	4700.33	0.411477		EBT00051369609	Thr1	G	35	Ac-loop	GGT	0.00193961	2069	0.193163
EBT00001514707	ThrT	36	Ac-loop	GGU	T	U	0.00177001	7986.67	0.0603185		EBT00051369609	Thr1	T	36	Ac-loop	GGT	0.00390111	2564.33	0.0312303
EBT00001514707	ThrT	37	Ac-loop	GGU	A	m6t6A	0.00196186	8499.33	0.431305		EBT00051369609	Thr1	A	37	Ac-loop	GGT	0.00892053	2647	0.256809
EBT00001514707	ThrT	38	Ac-loop	GGU	A	A	0.00181159	14945.3	0.116288		EBT00051369609	Thr1	A	38	Ac-loop	GGT	0.00060275	3561.67	0.0814923
EBT00001514707	ThrT	39	Ac-stem	GGU	G	G	0.000631714	16912	0.00743407		EBT00051369609	Thr1	G	39	Ac-stem	GGT	0.00139799	3877.67	0.0104627
EBT00001514707	ThrT	40	Ac-stem	GGU	G	G	0.00193076	17038.7	0.0041303		EBT00051369609	Thr1	G	40	Ac-stem	GGT	0.0023168	3918.67	0.00633928
EBT00001514707	ThrT	41	Ac-stem	GGU	G	G	0.00190313	17109.3	0.00272014		EBT00051369609	Thr1	G	41	Ac-stem	GGT	0.00305079	3943.67	0.00185607
EBT00001514707	ThrT	42	Ac-stem	GGU	T	U	0.00557012	17156	0		EBT00051369609	Thr1	T	42	Ac-stem	GGT	0.00533614	3951	0
EBT00001514707	ThrT	43	Ac-stem	GGU	G	G	0.00227413	17155	0.00230692		EBT00051369609	Thr1	G	43	Ac-stem	GGT	0.00196237	3951	0.00869783
EBT00001514707	ThrT	44	V-region	GGU	A	A	0.000810726	17194.7	0		EBT00051369609	Thr1	A	44	V-region	GGT	0.0012111	3985.67	0.000919117
EBT00001514707	ThrT	45	V-region	GGU	G	G	0.00182567	17192	0.00176128		EBT00051369609	Thr1	G	45	V-region	GGT	0.00133435	3989.33	0.00482288
EBT00001514707	ThrT	46	V-region	GGU	G	m7G	0.00652605	17222.3	0.0211803		EBT00051369609	Thr1	G	46	V-region	GGT	0.00764072	4008.67	0.0138581
EBT00001514707	ThrT	47	V-region	GGU	T	U	0.00806347	17595	0.00215505		EBT00051369609	Thr1	T	47	V-region	GGT	0.0107645	4065	0.00269872
EBT00001514707	ThrT	48	V-region	GGU	C	C	0.00223999	17633	0.000963173		EBT00051369609	Thr1	C	48	V-region	GGT	0.00169374	4076	0.0046398
EBT00001514707	ThrT	49	T-stem	GGU	G	G	0.00449251	17650	0.000264331		EBT00051369609	Thr1	A	49	T-stem	GGT	0.000701904	4095	0
EBT00001514707	ThrT	50	T-stem	GGU	G	G	0.00203052	17654.7	0.00026426		EBT00051369609	Thr1	G	50	T-stem	GGT	0.00173927	4095	0
EBT00001514707	ThrT	51	T-stem	GGU	C	C	0.00267473	17659.3	0.000415095		EBT00051369609	Thr1	C	51	T-stem	GGT	0.00288327	4095	0
EBT00001514707	ThrT	52	T-stem	GGU	A	A	0.00158357	17666.7	0		EBT00051369609	Thr1	G	52	T-stem	GGT	0.001556	4094.67	0
EBT00001514707	ThrT	53	T-stem	GGU	G	G	0.000830823	17666.7	0.00392791		EBT00051369609	Thr1	G	53	T-stem	GGT	0.00154618	4094.67	0.00831517
EBT00001514707	ThrT	54	T-loop	GGU	T	T	0.00256562	17736.3	0		EBT00051369609	Thr1	T	54	T-loop	GGT	0.00324963	4129	0
EBT00001514707	ThrT	55	T-loop	GGU	T	Y	0.00205366	17736.3	0		EBT00051369609	Thr1	T	55	T-loop	GGT	0.00241449	4129	0
EBT00001514707	ThrT	56	T-loop	GGU	C	C	0.00161308	17736.3	0		EBT00051369609	Thr1	C	56	T-loop	GGT	0.000476044	4129	0
EBT00001514707	ThrT	57	T-loop	GGU	G	G	0.0015503	17736.3	0		EBT00051369609	Thr1	A	57	T-loop	GGT	0.00154663	4127	0.000484379
EBT00001514707	ThrT	58	T-loop	GGU	A	A	0.000902483	17735.3	5.63814e-05		EBT00051369609	Thr1	A	58	T-loop	GGT	0.000611201	4129	0
EBT00001514707	ThrT	59	T-loop	GGU	A	A	0.00134791	17736.3	0		EBT00051369609	Thr1	A	59	T-loop	GGT	0.000636134	4129	0
EBT00001514707	ThrT	60	T-loop	GGU	T	U	0.00204664	17736.3	0		EBT00051369609	Thr1	T	60	T-loop	GGT	0.00433938	4129	0
EBT00001514707	ThrT	61	T-stem	GGU	C	C	0.00131313	17736.3	0		EBT00051369609	Thr1	C	61	T-stem	GGT	0.00387532	4128.67	8.07297e-05
EBT00001514707	ThrT	62	T-stem	GGU	T	U	0.00559738	17736.3	0		EBT00051369609	Thr1	C	62	T-stem	GGT	0.0033622	4129	0
EBT00001514707	ThrT	63	T-stem	GGU	G	G	0.00234637	17736.3	0		EBT00051369609	Thr1	G	63	T-stem	GGT	0.00447438	4129	0
EBT00001514707	ThrT	64	T-stem	GGU	C	C	0.00446326	17735	5.63825e-05		EBT00051369609	Thr1	C	64	T-stem	GGT	0.00148734	4129	0
EBT00001514707	ThrT	65	T-stem	GGU	C	C	0.0040604	17736	0		EBT00051369609	Thr1	T	65	T-stem	GGT	0.00505062	4129	0
EBT00001514707	ThrT	66	Acc-stem	GGU	T	U	0.003955	17735.7	3.75873e-05		EBT00051369609	Thr1	C	66	Acc-stem	GGT	0.00202208	4128.33	0.00016146
EBT00001514707	ThrT	67	Acc-stem	GGU	A	A	0.00121548	17736.3	0		EBT00051369609	Thr1	A	67	Acc-stem	GGT	0.00114572	4129	0
EBT00001514707	ThrT	68	Acc-stem	GGU	T	U	0.00449427	17736.3	0		EBT00051369609	Thr1	T	68	Acc-stem	GGT	0.0083064	4129	0
EBT00001514707	ThrT	69	Acc-stem	GGU	C	C	0.00373309	17735	0		EBT00051369609	Thr1	G	69	Acc-stem	GGT	0.00382118	4129	0
EBT00001514707	ThrT	70	Acc-stem	GGU	A	A	0.0020694	17734.7	5.63836e-05		EBT00051369609	Thr1	A	70	Acc-stem	GGT	0.00290379	4129	0
EBT00001514707	ThrT	71	Acc-stem	GGU	G	G	0.00396036	17735.7	0		EBT00051369609	Thr1	G	71	Acc-stem	GGT	0.00491124	4129	0
EBT00001514707	ThrT	72	Acc-stem	GGU	C	C	0.00312627	17735.3	0		EBT00051369609	Thr1	C	72	Acc-stem	GGT	0.00189995	4129	0
EBT00001514707	ThrT	73	0	GGU	A	A	0.00546541	17735.3	0		EBT00051369609	Thr1	T	73	0	GGT	0.726065	4129	0
EBT00001514707	ThrT	74	0	GGU	C	C	0.00161332	17735.3	0		EBT00051369609	Thr1	C	74	0	GGT	0.000214913	4129	0
EBT00001514707	ThrT	75	0	GGU	C	C	0	17735.3	0		EBT00051369609	Thr1	C	75	0	GGT	0	3997.67	0
EBT00001514707	ThrT	76	0	GGU	A	A	0	15619	0		EBT00051369609	Thr1	A	76	0	GGT	0	3703.67	0
EBT00001514598	TyrU	1	Acc-stem	GUA	G	G	NA	0	NA		EBT00051369986	Tyr1	G	1	Acc-stem	GUA	NA	75.6667	NA
EBT00001514598	TyrU	2	Acc-stem	GUA	G	G	NA	0	NA		EBT00051369986	Tyr1	G	2	Acc-stem	GUA	NA	75.6667	NA
EBT00001514598	TyrU	3	Acc-stem	GUA	T	U	NA	0	NA		EBT00051369986	Tyr1	A	3	Acc-stem	GUA	NA	75.6667	NA
EBT00001514598	TyrU	4	Acc-stem	GUA	G	G	NA	16.3333	NA		EBT00051369986	Tyr1	G	4	Acc-stem	GUA	0	170	0
EBT00001514598	TyrU	5	Acc-stem	GUA	G	G	NA	16.3333	NA		EBT00051369986	Tyr1	G	5	Acc-stem	GUA	0	170	0
EBT00001514598	TyrU	6	Acc-stem	GUA	G	G	NA	16.3333	NA		EBT00051369986	Tyr1	G	6	Acc-stem	GUA	0	170	0.043152
EBT00001514598	TyrU	7	Acc-stem	GUA	G	G	NA	16.3333	NA		EBT00051369986	Tyr1	A	7	Acc-stem	GUA	0.624342	177.667	0.10118
EBT00001514598	TyrU	8	0	GUA	T	s4U	NA	16.3333	NA		EBT00051369986	Tyr1	T	8	0	GUA	0.033195	197.667	0
EBT00001514598	TyrU	9	0	GUA	T	s4U	NA	25	NA		EBT00051369986	Tyr1	T	9	0	GUA	0.0014556	197.667	0.0918836
EBT00001514598	TyrU	10	D-stem	GUA	C	C	NA	25	NA		EBT00051369986	Tyr1	C	10	D-stem	GUA	0.00390658	217.667	0.00152905
EBT00001514598	TyrU	11	D-stem	GUA	C	C	NA	25	NA		EBT00051369986	Tyr1	C	11	D-stem	GUA	0.00406461	218	0
EBT00001514598	TyrU	12	D-stem	GUA	C	C	NA	25	NA		EBT00051369986	Tyr1	C	12	D-stem	GUA	0.0014556	218	0
EBT00001514598	TyrU	13	D-stem	GUA	G	G	NA	25	NA		EBT00051369986	Tyr1	G	13	D-stem	GUA	0	218	0
EBT00001514598	TyrU	14	D-loop	GUA	A	A	NA	25	NA		EBT00051369986	Tyr1	A	14	D-loop	GUA	0	218	0
EBT00001514598	TyrU	15	D-loop	GUA	G	G	NA	25	NA		EBT00051369986	Tyr1	G	15	D-loop	GUA	0	218	0
EBT00001514598	TyrU	16	D-loop	GUA	C	C	NA	25	NA		EBT00051369986	Tyr1	T	16	D-loop	GUA	0.71264	218	0
EBT00001514598	TyrU	18	D-loop	GUA	G	Gm	NA	25	NA		EBT00051369986	Tyr1	G	18	D-loop	GUA	0.00291121	218	0
EBT00001514598	TyrU	19	D-loop	GUA	G	G	NA	25	NA		EBT00051369986	Tyr1	G	19	D-loop	GUA	0.0011534	218	0
EBT00001514598	TyrU	20	D-loop	GUA	C	C	NA	25	NA		EBT00051369986	Tyr1	C	20	D-loop	GUA	0	218	0
EBT00001514598	TyrU	20a	D-loop	GUA	C	C	NA	25.3333	NA		EBT00051369986	Tyr1	C	20a	D-loop	GUA	0	218	0.0150602
EBT00001514598	TyrU	20b	D-loop	GUA	A	A	NA	25.3333	NA		EBT00051369986	Tyr1	A	20b	D-loop	GUA	0.0011534	221.333	0.00150376
EBT00001514598	TyrU	21	D-loop	GUA	A	A	NA	25.3333	NA		EBT00051369986	Tyr1	A	21	D-loop	GUA	0.0011534	221.667	0.0431655
EBT00001514598	TyrU	22	D-stem	GUA	A	A	NA	25.3333	NA		EBT00051369986	Tyr1	A	22	D-stem	GUA	0	231.667	0
EBT00001514598	TyrU	23	D-stem	GUA	G	G	NA	25.3333	NA		EBT00051369986	Tyr1	G	23	D-stem	GUA	0.00356516	231.667	0.00429799
EBT00001514598	TyrU	24	D-stem	GUA	G	G	NA	25.3333	NA		EBT00051369986	Tyr1	G	24	D-stem	GUA	0.00380228	232.667	0
EBT00001514598	TyrU	25	D-stem	GUA	G	G	NA	25.3333	NA		EBT00051369986	Tyr1	G	25	D-stem	GUA	0	232.667	0
EBT00001514598	TyrU	26	0	GUA	A	A	NA	25.3333	NA		EBT00051369986	Tyr1	A	26	Ac-stem	GUA	0	232.667	0.0210379
EBT00001514598	TyrU	27	Ac-Stem	GUA	G	G	NA	25.3333	NA		EBT00051369986	Tyr1	T	27	Ac-stem	GUA	0.683537	237.667	0
EBT00001514598	TyrU	28	Ac-Stem	GUA	C	C	NA	25.3333	NA		EBT00051369986	Tyr1	C	28	Ac-stem	GUA	0.00348215	237.667	0
EBT00001514598	TyrU	29	Ac-Stem	GUA	A	A	NA	25.3333	NA		EBT00051369986	Tyr1	A	29	Ac-stem	GUA	0	237.667	0
EBT00001514598	TyrU	30	Ac-Stem	GUA	G	G	NA	25.3333	NA		EBT00051369986	Tyr1	G	30	Ac-stem	GUA	0.0311751	237.667	0.0206044
EBT00001514598	TyrU	31	Ac-Stem	GUA	A	A	NA	25.3333	NA		EBT00051369986	Tyr1	A	31	Ac-loop	GUA	0.00113766	242.667	0.0175439
EBT00001514598	TyrU	32	Ac-loop	GUA	C	C	NA	25.3333	NA		EBT00051369986	Tyr1	C	32	Ac-loop	GUA	0.00111857	247	0
EBT00001514598	TyrU	33	Ac-loop	GUA	T	U	NA	25.3333	NA		EBT00051369986	Tyr1	T	33	Ac-loop	GUA	0	242	0.672678
EBT00001514598	TyrU	34	Ac-loop	GUA	G	Q	NA	35.3333	NA		EBT00051369986	Tyr1	G	34	Ac-loop	GUA	0.000931099	739.333	0.329707
EBT00001514598	TyrU	35	Ac-loop	GUA	T	Y	NA	51.6667	NA		EBT00051369986	Tyr1	T	35	Ac-loop	GUA	0.00117676	1103	0.230465
EBT00001514598	TyrU	36	Ac-loop	GUA	A	A	NA	63.3333	NA		EBT00051369986	Tyr1	A	36	Ac-loop	GUA	0.00152519	1433.33	0.257084
EBT00001514598	TyrU	37	Ac-loop	GUA	A	ms2i6A	NA	75.3333	NA		EBT00051369986	Tyr1	A	37	Ac-loop	GUA	0.272495	1929.33	0.736945
EBT00001514598	TyrU	38	Ac-loop	GUA	A	A	0.0248108	275	0.371189		EBT00051369986	Tyr1	A	38	Ac-loop	GUA	0.0187269	7334.33	0.280713
EBT00001514598	TyrU	39	Ac-stem	GUA	T	Y	0.00572442	437.333	0.0367107		EBT00051369986	Tyr1	T	39	Ac-stem	GUA	6.53e-05	10196.7	0.025051
EBT00001514598	TyrU	40	Ac-stem	GUA	C	C	0.00141526	454	0.00365765		EBT00051369986	Tyr1	C	40	Ac-stem	GUA	0.00199989	10458.7	0.00460011
EBT00001514598	TyrU	41	Ac-stem	GUA	T	U	0.00589758	455.667	0.000730994		EBT00051369986	Tyr1	T	41	Ac-stem	GUA	0.00177564	10507	9.51656e-05
EBT00001514598	TyrU	42	Ac-stem	GUA	G	G	0.000953743	456	0		EBT00051369986	Tyr1	G	42	Ac-stem	GUA	0.000933455	10508	0.00514407
EBT00001514598	TyrU	43	Ac-stem	GUA	C	C	0.111655	456	0.0122744		EBT00051369986	Tyr1	A	43	Ac-stem	GUA	0.417593	10562.3	0.00624098
EBT00001514598	TyrU	44	V-region	GUA	C	C	0.00227461	461.667	0		EBT00051369986	Tyr1	C	44	V-region	GUA	0.00232532	10628.7	0.00219051
EBT00001514598	TyrU	V1	V-region	GUA	G	G	0.000945626	461.667	0.00502874		EBT00051369986	Tyr1	G	V1	V-region	GUA	0.00141893	10652	0.00767009
EBT00001514598	TyrU	V2	V-region	GUA	T	U	0.00183768	464	0.000717875		EBT00051369986	Tyr1	T	V2	V-region	GUA	0.00630706	10734.3	0.00071371
EBT00001514598	TyrU	V3	V-region	GUA	C	C	0.00230608	464.333	0.0106534		EBT00051369986	Tyr1	C	V3	V-region	GUA	0.00245598	10742	0.0205756
EBT00001514598	TyrU	V8	V-region	GUA	A	A	0	469.333	0.00424328		EBT00051369986	Tyr1	A	V8	V-region	GUA	0.00100416	10967.7	0.0171755
EBT00001514598	TyrU	V9	V-region	GUA	C	C	0.116173	471.333	0.0146341		EBT00051369986	Tyr1	T	V9	V-region	GUA	0.262549	11159.3	0.00576146
EBT00001514598	TyrU	V10	V-region	GUA	A	A	0	478.333	0		EBT00051369986	Tyr1	A	V10	V-region	GUA	0.142869	11224	0.00897666
EBT00001514598	TyrU	V17	V-region	GUA	G	G	0	478.333	0		EBT00051369986	Tyr1	G	V17	V-region	GUA	0.00292256	11325.7	0.0102537
EBT00001514598	TyrU	V18	V-region	GUA	A	A	0	478.333	0		EBT00051369986	Tyr1	A	V18	V-region	GUA	0.00130738	11443	0.0101782
EBT00001514598	TyrU	V19	V-region	GUA	C	C	0	478.333	0		EBT00051369986	Tyr1	C	V19	V-region	GUA	0.000627218	11560.7	0.0271802
EBT00001514598	TyrU	46	V-region	GUA	T	U	0	478.333	0		EBT00051369986	Tyr1	T	46	V-region	GUA	0.00264318	11883.7	0.00249021
EBT00001514598	TyrU	47	V-region	GUA	T	U	0.0014905	478.333	0		EBT00051369986	Tyr1	T	47	V-region	GUA	0.00171747	11913.3	0.000447478
EBT00001514598	TyrU	48	V-region	GUA	C	C	0.0014905	478.333	0		EBT00051369986	Tyr1	C	48	V-region	GUA	0.00136675	11918.7	0.0039279
EBT00001514598	TyrU	49	T-stem	GUA	G	G	0.00132431	478.333	0		EBT00051369986	Tyr1	G	49	T-stem	GUA	0.0016133	11965.7	0.00186297
EBT00001514598	TyrU	50	T-stem	GUA	A	A	0	478.333	0		EBT00051369986	Tyr1	A	50	T-stem	GUA	0.000407374	11988	0.000833472
EBT00001514598	TyrU	51	T-stem	GUA	A	A	0.000458505	478.333	0		EBT00051369986	Tyr1	A	51	T-stem	GUA	0.000662985	11998	0.000361041
EBT00001514598	TyrU	52	T-stem	GUA	G	G	0.0106857	478.333	0		EBT00051369986	Tyr1	G	52	T-stem	GUA	0.00257436	12002.3	0.000360911
EBT00001514598	TyrU	53	T-stem	GUA	G	G	0.0152833	478.333	0		EBT00051369986	Tyr1	G	53	T-stem	GUA	0.00443156	12006.7	0.00337557
EBT00001514598	TyrU	54	T-loop	GUA	T	T	0.0558902	478.333	0		EBT00051369986	Tyr1	T	54	T-loop	GUA	0.00436595	12047.3	2.76684e-05
EBT00001514598	TyrU	55	T-loop	GUA	T	Y	0.0341463	478.333	0		EBT00051369986	Tyr1	T	55	T-loop	GUA	0.00232265	12047.7	0
EBT00001514598	TyrU	56	T-loop	GUA	C	C	0.0616393	478.333	0		EBT00051369986	Tyr1	C	56	T-loop	GUA	0.0029608	12047	5.5336e-05
EBT00001514598	TyrU	57	T-loop	GUA	G	G	0.103132	478	0		EBT00051369986	Tyr1	G	57	T-loop	GUA	0.00146916	12047.7	0
EBT00001514598	TyrU	58	T-loop	GUA	A	A	0.0446536	477.667	0.00139373		EBT00051369986	Tyr1	A	58	T-loop	GUA	0.000601208	12047.3	2.76684e-05
EBT00001514598	TyrU	59	T-loop	GUA	A	A	0.0649318	478.333	0		EBT00051369986	Tyr1	A	59	T-loop	GUA	0.000659555	12047.7	0
EBT00001514598	TyrU	60	T-loop	GUA	T	U	0.111825	478.333	0		EBT00051369986	Tyr1	T	60	T-loop	GUA	0.00305899	12047.7	0
EBT00001514598	TyrU	61	T-stem	GUA	C	C	0.122017	477.667	0.00139373		EBT00051369986	Tyr1	C	61	T-stem	GUA	0.00438706	12047.7	0
EBT00001514598	TyrU	62	T-stem	GUA	C	C	0.0950385	478.333	0		EBT00051369986	Tyr1	C	62	T-stem	GUA	0.00254667	12047.7	0
EBT00001514598	TyrU	63	T-stem	GUA	T	U	0.165738	476.333	0.00418118		EBT00051369986	Tyr1	T	63	T-stem	GUA	0.00421122	12047.3	0
EBT00001514598	TyrU	64	T-stem	GUA	T	U	0.0665982	478.333	0		EBT00051369986	Tyr1	T	64	T-stem	GUA	0.00403599	12047.3	0
EBT00001514598	TyrU	65	T-stem	GUA	C	C	0.0636624	478	0.000696864		EBT00051369986	Tyr1	C	65	T-stem	GUA	0.00466038	12046.3	0
EBT00001514598	TyrU	66	Acc-stem	GUA	C	C	0.158596	478.333	0		EBT00051369986	Tyr1	T	66	Acc-stem	GUA	0.391684	12037	0.000442882
EBT00001514598	TyrU	67	Acc-stem	GUA	C	C	0.0287839	478.333	0		EBT00051369986	Tyr1	C	67	Acc-stem	GUA	0.00728762	12042.3	0.000442687
EBT00001514598	TyrU	68	Acc-stem	GUA	C	C	0.0333191	478.333	0		EBT00051369986	Tyr1	C	68	Acc-stem	GUA	0.0082482	12047.7	0
EBT00001514598	TyrU	69	Acc-stem	GUA	C	C	0.0220711	478.333	0		EBT00051369986	Tyr1	C	69	Acc-stem	GUA	0.00431274	12047	0
EBT00001514598	TyrU	70	Acc-stem	GUA	A	A	0.164134	477.667	0.00069735		EBT00051369986	Tyr1	T	70	Acc-stem	GUA	0.391178	12046.7	0
EBT00001514598	TyrU	71	Acc-stem	GUA	C	C	0.018615	478	0.000696864		EBT00051369986	Tyr1	C	71	Acc-stem	GUA	0.00256655	12046.3	8.30059e-05
EBT00001514598	TyrU	72	Acc-stem	GUA	C	C	0.014189	478.333	0		EBT00051369986	Tyr1	C	72	Acc-stem	GUA	0.00265759	12047.3	0
EBT00001514598	TyrU	73	0	GUA	A	A	0.0328718	478.333	0		EBT00051369986	Tyr1	A	73	0	GUA	0.00379472	12046.7	0
EBT00001514598	TyrU	74	0	GUA	C	C	0.0088517	478.333	0		EBT00051369986	Tyr1	C	74	0	GUA	0.00191036	12046	0
EBT00001514598	TyrU	75	0	GUA	C	C	0	478.333	0		EBT00051369986	Tyr1	C	75	0	GUA	0	11440	0
EBT00001514598	TyrU	76	0	GUA	A	A	0	406.333	0		EBT00051369986	Tyr1	A	76	0	GUA	0	9986.67	0
EBT00001514721	AspT	1	Acc-stem	GUC	G	G	0	750	0.0008881		EBT00051365808	Asp1	G	1	Acc-stem	GUC	NA	0.333333	NA
EBT00001514721	AspT	2	Acc-stem	GUC	G	G	0	750.667	0.230349		EBT00051365808	Asp1	G	2	Acc-stem	GUC	NA	0.666667	NA
EBT00001514721	AspT	3	Acc-stem	GUC	A	A	0	975.333	0.0207497		EBT00051365808	Asp1	A	3	Acc-stem	GUC	NA	0.666667	NA
EBT00001514721	AspT	4	Acc-stem	GUC	G	G	0.000524934	996	0		EBT00051365808	Asp1	G	4	Acc-stem	GUC	NA	0.666667	NA
EBT00001514721	AspT	5	Acc-stem	GUC	C	C	0.000721244	996	0.00033456		EBT00051365808	Asp1	C	5	Acc-stem	GUC	NA	0.666667	NA
EBT00001514721	AspT	6	Acc-stem	GUC	G	G	0.000784775	996.333	0		EBT00051365808	Asp1	G	6	Acc-stem	GUC	NA	0.666667	NA
EBT00001514721	AspT	7	Acc-stem	GUC	G	G	0.000196194	996.333	0.00763612		EBT00051365808	Asp1	G	7	Acc-stem	GUC	NA	0.666667	NA
EBT00001514721	AspT	8	0	GUC	T	s4U	0.0559411	1004	0.00594059		EBT00051365808	Asp1	T	8	0	GUC	NA	0.666667	NA
EBT00001514721	AspT	9	0	GUC	A	A	0.000194137	1010	0.0117417		EBT00051365808	Asp1	A	9	0	GUC	NA	0.666667	NA
EBT00001514721	AspT	10	D-stem	GUC	G	G	0.00117343	1022	0.0466418		EBT00051365808	Asp1	G	10	D-stem	GUC	NA	0.666667	NA
EBT00001514721	AspT	11	D-stem	GUC	T	U	0.00337867	1072	0		EBT00051365808	Asp1	T	11	D-stem	GUC	NA	0.666667	NA
EBT00001514721	AspT	12	D-stem	GUC	T	U	0.00336831	1072	0		EBT00051365808	Asp1	T	12	D-stem	GUC	NA	0.666667	NA
EBT00001514721	AspT	13	D-stem	GUC	C	C	0.00216517	1072	0.000310848		EBT00051365808	Asp1	C	13	D-stem	GUC	NA	0.666667	NA
EBT00001514721	AspT	14	D-loop	GUC	A	A	0	1072.33	0.00525665		EBT00051365808	Asp1	A	14	D-loop	GUC	NA	0.666667	NA
EBT00001514721	AspT	15	D-loop	GUC	G	G	0.000177778	1078	0.164341		EBT00051365808	Asp1	G	15	D-loop	GUC	NA	0.666667	NA
EBT00001514721	AspT	16	D-loop	GUC	T	D	0.00191274	1290	0.000258331		EBT00051365808	Asp1	T	16	D-loop	GUC	NA	1	NA
EBT00001514721	AspT	17	D-loop	GUC	C	C	0.00696724	1290.33	0.016764		EBT00051365808	Asp1	C	17	D-loop	GUC	NA	1	NA
EBT00001514721	AspT	18	D-loop	GUC	G	G	0.00120358	1312.33	0		EBT00051365808	Asp1	G	18	D-loop	GUC	NA	1	NA
EBT00001514721	AspT	19	D-loop	GUC	G	G	0.000819558	1312.33	0.157861		EBT00051365808	Asp1	G	19	D-loop	GUC	NA	1	NA
EBT00001514721	AspT	20	D-loop	GUC	T	DD	0.00156079	1558.33	0.00848356		EBT00051365808	Asp1	T	20	D-loop	GUC	NA	1.33333	NA
EBT00001514721	AspT	20a	D-loop	GUC	T	DD	0.00222878	1571.67	0.0129789		EBT00051365808	Asp1	T	20a	D-loop	GUC	NA	1.66667	NA
EBT00001514721	AspT	21	D-loop	GUC	A	A	0.000267308	1592.33	0.000209293		EBT00051365808	Asp1	A	21	D-loop	GUC	NA	1.66667	NA
EBT00001514721	AspT	22	D-stem	GUC	G	G	0.00106923	1592.67	0.0436349		EBT00051365808	Asp1	G	22	D-stem	GUC	NA	1.66667	NA
EBT00001514721	AspT	23	D-stem	GUC	A	A	0	1665.33	0.0710301		EBT00051365808	Asp1	A	23	D-stem	GUC	NA	1.66667	NA
EBT00001514721	AspT	24	D-stem	GUC	A	A	0.000489858	1792.67	0.0356823		EBT00051365808	Asp1	A	24	D-stem	GUC	NA	1.66667	NA
EBT00001514721	AspT	25	D-stem	GUC	T	U	0.0044821	1859	0.000179276		EBT00051365808	Asp1	T	25	D-stem	GUC	NA	1.66667	NA
EBT00001514721	AspT	26	0	GUC	A	A	0.00617232	1859.33	0		EBT00051365808	Asp1	A	26	0	GUC	NA	1.66667	NA
EBT00001514721	AspT	27	Ac-Stem	GUC	C	C	0.000822519	1859.33	0		EBT00051365808	Asp1	C	27	Ac-stem	GUC	NA	1.66667	NA
EBT00001514721	AspT	28	Ac-Stem	GUC	C	C	0.00264368	1859.33	0.00552683		EBT00051365808	Asp1	C	28	Ac-stem	GUC	NA	1.66667	NA
EBT00001514721	AspT	29	Ac-Stem	GUC	T	U	0.428983	1869.67	0.000356442		EBT00051365808	Asp1	G	29	Ac-stem	GUC	NA	1.66667	NA
EBT00001514721	AspT	30	Ac-Stem	GUC	G	G	0.000712517	1870.33	0		EBT00051365808	Asp1	G	30	Ac-stem	GUC	NA	1.66667	NA
EBT00001514721	AspT	31	Ac-Stem	GUC	C	C	0.0012886	1862	0.00410055		EBT00051365808	Asp1	C	31	Ac-stem	GUC	NA	1.66667	NA
EBT00001514721	AspT	32	Ac-loop	GUC	C	C	0.00070972	1869.67	0.00988526		EBT00051365808	Asp1	C	32	Ac-loop	GUC	NA	1.66667	NA
EBT00001514721	AspT	33	Ac-loop	GUC	T	U	0.00174631	1888.33	0.0144398		EBT00051365808	Asp1	T	33	Ac-loop	GUC	NA	1.66667	NA
EBT00001514721	AspT	34	Ac-loop	GUC	G	Glu-Q	0.00261823	1916	0.184681		EBT00051365808	Asp1	G	34	Ac-loop	GUC	NA	1.66667	NA
EBT00001514721	AspT	35	Ac-loop	GUC	T	U	0.00190627	2350	0		EBT00051365808	Asp1	T	35	Ac-loop	GUC	NA	2.33333	NA
EBT00001514721	AspT	36	Ac-loop	GUC	C	C	0.00150423	2254.33	0.614072		EBT00051365808	Asp1	C	36	Ac-loop	GUC	NA	2.33333	NA
EBT00001514721	AspT	37	Ac-loop	GUC	A	m2A	0.00305057	5841.33	0.573936		EBT00051365808	Asp1	A	37	Ac-loop	GUC	NA	3.66667	NA
EBT00001514721	AspT	38	Ac-loop	GUC	C	C	0.00349663	13710	0.447578		EBT00051365808	Asp1	C	38	Ac-loop	GUC	NA	17.6667	NA
EBT00001514721	AspT	39	Ac-stem	GUC	G	G	0.000339238	24818	0.0287004		EBT00051365808	Asp1	G	39	Ac-stem	GUC	NA	20.6667	NA
EBT00001514721	AspT	40	Ac-stem	GUC	C	C	0.00043562	25551.3	0.0110565		EBT00051365808	Asp1	C	40	Ac-stem	GUC	NA	20.6667	NA
EBT00001514721	AspT	41	Ac-stem	GUC	A	A	0.0490075	25837	0.00559354		EBT00051365808	Asp1	C	41	Ac-stem	GUC	NA	21	NA
EBT00001514721	AspT	42	Ac-stem	GUC	G	G	0.00217527	25982.3	0.00322255		EBT00051365808	Asp1	G	42	Ac-stem	GUC	NA	31.6667	NA
EBT00001514721	AspT	43	Ac-stem	GUC	G	G	0.00123711	26066.3	0.000881586		EBT00051365808	Asp1	G	43	Ac-stem	GUC	NA	36.6667	NA
EBT00001514721	AspT	44	V-region	GUC	G	G	0.00109071	26089.3	0.000459747		EBT00051365808	Asp1	G	44	V-region	GUC	NA	37.3333	NA
EBT00001514721	AspT	45	V-region	GUC	G	G	0.00194066	26101.3	0.00322059		EBT00051365808	Asp1	G	45	V-region	GUC	NA	37.3333	NA
EBT00001514721	AspT	46	V-region	GUC	G	m7G	0.00296736	26185.7	0.0297293		EBT00051365808	Asp1	G	46	V-region	GUC	NA	37.3333	NA
EBT00001514721	AspT	47	V-region	GUC	T	U	0.00489482	26988	0.00109805		EBT00051365808	Asp1	T	47	V-region	GUC	0.0429108	138.667	0.111111
EBT00001514721	AspT	48	V-region	GUC	C	C	0.00216164	27017.7	0.00115839		EBT00051365808	Asp1	C	48	V-region	GUC	0.00645015	156	0.0021322
EBT00001514721	AspT	49	T-stem	GUC	G	G	0.00167889	27049	0.00100949		EBT00051365808	Asp1	G	49	T-stem	GUC	0.0014556	156.333	0.00424628
EBT00001514721	AspT	50	T-stem	GUC	C	C	0.00166767	27076.3	0		EBT00051365808	Asp1	C	50	T-stem	GUC	0.00702643	157	0
EBT00001514721	AspT	51	T-stem	GUC	G	G	0.00126097	27076	3.69317e-05		EBT00051365808	Asp1	G	51	T-stem	GUC	0.00768627	156.667	0.00212314
EBT00001514721	AspT	52	T-stem	GUC	G	G	0.00164598	27077	0.000184624		EBT00051365808	Asp1	G	52	T-stem	GUC	0.00557083	157	0
EBT00001514721	AspT	53	T-stem	GUC	G	G	0.000886211	27082	0.00369112		EBT00051365808	Asp1	G	53	T-stem	GUC	0.00436681	157	0.0368098
EBT00001514721	AspT	54	T-loop	GUC	T	T	0.00107876	27182.3	1.2263e-05		EBT00051365808	Asp1	T	54	T-loop	GUC	0.00416667	163	0
EBT00001514721	AspT	55	T-loop	GUC	T	Y	0.000504712	27182.7	0		EBT00051365808	Asp1	T	55	T-loop	GUC	0.00416667	163	0
EBT00001514721	AspT	56	T-loop	GUC	C	C	0.000470837	27182.7	0		EBT00051365808	Asp1	C	56	T-loop	GUC	0	163	0
EBT00001514721	AspT	57	T-loop	GUC	G	G	9.71e-05	27182.7	0		EBT00051365808	Asp1	G	57	T-loop	GUC	0	163	0
EBT00001514721	AspT	58	T-loop	GUC	A	A	0.00035148	27182.7	0		EBT00051365808	Asp1	A	58	T-loop	GUC	0	163	0
EBT00001514721	AspT	59	T-loop	GUC	G	G	0.00164313	27182.3	0		EBT00051365808	Asp1	G	59	T-loop	GUC	0	163	0
EBT00001514721	AspT	60	T-loop	GUC	T	U	0.00231158	27181.7	0		EBT00051365808	Asp1	T	60	T-loop	GUC	0	163	0
EBT00001514721	AspT	61	T-stem	GUC	C	C	0.00173346	27179.7	0.000110364		EBT00051365808	Asp1	C	61	T-stem	GUC	0	163	0
EBT00001514721	AspT	62	T-stem	GUC	C	C	0.00491445	27182.7	0		EBT00051365808	Asp1	C	62	T-stem	GUC	0	163	0
EBT00001514721	AspT	63	T-stem	GUC	C	C	0.00292125	27182.3	1.2263e-05		EBT00051365808	Asp1	C	63	T-stem	GUC	0.00821525	163	0
EBT00001514721	AspT	64	T-stem	GUC	G	G	0.00282563	27182.7	0		EBT00051365808	Asp1	G	64	T-stem	GUC	0.00833333	163	0
EBT00001514721	AspT	65	T-stem	GUC	T	Y	0.00537887	27182.7	0		EBT00051365808	Asp1	T	65	T-stem	GUC	0.0144395	163	0
EBT00001514721	AspT	66	Acc-stem	GUC	C	C	0.012226	27181.3	3.67886e-05		EBT00051365808	Asp1	C	66	Acc-stem	GUC	0.0102729	163	0
EBT00001514721	AspT	67	Acc-stem	GUC	C	C	0.00424239	27182.3	0		EBT00051365808	Asp1	C	67	Acc-stem	GUC	0.00968286	163	0
EBT00001514721	AspT	68	Acc-stem	GUC	G	G	0.0145267	27172.7	0.000343364		EBT00051365808	Asp1	G	68	Acc-stem	GUC	0.0143366	163	0
EBT00001514721	AspT	69	Acc-stem	GUC	T	U	0.0664664	27182	0		EBT00051365808	Asp1	C	69	Acc-stem	GUC	0.925089	163	0
EBT00001514721	AspT	70	Acc-stem	GUC	T	U	0.00509972	27182	0		EBT00051365808	Asp1	T	70	Acc-stem	GUC	0	163	0
EBT00001514721	AspT	71	Acc-stem	GUC	C	C	0.0891351	27181	4.90513e-05		EBT00051365808	Asp1	C	71	Acc-stem	GUC	0.00416667	163	0
EBT00001514721	AspT	72	Acc-stem	GUC	C	C	0.00654978	27182.3	0		EBT00051365808	Asp1	C	72	Acc-stem	GUC	0.00546475	163	0
EBT00001514721	AspT	73	0	GUC	G	G	0.0110124	27182	0		EBT00051365808	Asp1	G	73	0	GUC	0.0123819	163	0
EBT00001514721	AspT	74	0	GUC	C	C	0.00285256	27181.7	1.22629e-05		EBT00051365808	Asp1	C	74	0	GUC	0.00340714	163	0
EBT00001514721	AspT	75	0	GUC	C	C	0	27182	0		EBT00051365808	Asp1	C	75	0	GUC	0	122.333	0
EBT00001514721	AspT	76	0	GUC	A	A	0	22130.7	0		EBT00051365808	Asp1	A	76	0	GUC	0	100	0
EBT00001514699	HisR	-1	Acc-stem	GUG	G	G	0	1017	0.0110211		EBT00051369258	NA	NA	NA	NA	NA	NA	NA	NA
EBT00001514699	HisR	1	Acc-stem	GUG	G	G	0	1028.33	0.00771952		EBT00051369258	His1	G	1	Acc-stem	GUG	0	254	0.0650307
EBT00001514699	HisR	2	Acc-stem	GUG	T	U	0.00244324	1036.33	0.00128494		EBT00051369258	His1	T	2	Acc-stem	GUG	0	271.667	0.00244798
EBT00001514699	HisR	3	Acc-stem	GUG	G	G	0.000560538	1037.67	0		EBT00051369258	His1	G	3	Acc-stem	GUG	0.000918274	272.333	0.00122249
EBT00001514699	HisR	4	Acc-stem	GUG	G	G	0	1037.67	0.00922979		EBT00051369258	His1	G	4	Acc-stem	GUG	0.00310619	272.667	0
[truncated: 1,180 more rows]
