# Supplementary material
Source: HighWire-hosted journal article supplement (doi:10.1101/rna.080004.124)
Supplement: SuppTable8.xlsx [file SuppTable8.xlsx]

## Sheet: Sheet1
Transcript ID	Name	baseMean	log2FoldChange	lfcSE	stat	pvalue	padj
EBT00051364934	Ser1(CGA)	416.523	-0.462448	0.47038	-0.983137	0.32554	0.379797
EBT00051365018	Ser1(UGA)	179.18	-1.61128	0.606036	-2.65873	0.00784369	0.0122013
EBT00051365099	Met3(CAU)	1391.63	-2.82606	0.379391	-7.44894	9.40908e-14	6.53952e-13
EBT00051365187	Lys1(UUU)	153035	1.98733	0.331641	5.9924	2.06764e-09	6.68008e-09
EBT00051365344	Arg1(CCG)	3309.04	0.253617	0.342129	0.741291	0.458517	0.493788
EBT00051365422	Cys1(GCA)	15273.6	1.48617	0.457238	3.25031	0.00115279	0.00193669
EBT00051365503	Val1(GAC)	8807.06	-0.915901	0.410752	-2.22981	0.0257598	0.0373073
EBT00051365670	Arg1(UCU)	1726.97	1.75233	0.391715	4.47349	7.69534e-06	1.46911e-05
EBT00051365808	Asp1(GUC)	215.548	-0.780625	0.601508	-1.29778	0.194362	0.240095
EBT00051365908	Asp2(GUC)	217.571	-1.80723	0.510098	-3.54291	0.000395734	0.000692534
EBT00051366161	Thr1(UGU)	6314.25	-1.97363	0.316199	-6.24174	4.32726e-10	1.51454e-09
EBT00051366328	Trp1(CCA)	2434.9	-5.48102	0.356384	-15.3795	2.24606e-53	3.14449e-52
EBT00051366399	Val1(UAC)	35060.4	1.41005	0.278448	5.06395	4.10657e-07	9.58201e-07
EBT00051366465	Ala1(GGC)	128004	2.15107	0.28953	7.42952	1.08992e-13	6.53952e-13
EBT00051366536	Ser1(GCU)	3125.92	-0.178724	0.372791	-0.479422	0.631638	0.647044
EBT00051366603	Arg1(CCU)	558.285	-5.41329	0.396112	-13.6661	1.61887e-42	1.69982e-41
EBT00051366843	Arg1(ACG)	41438.6	1.78064	0.309742	5.74878	8.98914e-09	2.51696e-08
EBT00051366923	Glu1(UUC)	14580.8	-2.54299	0.374889	-6.78333	1.17439e-11	6.16557e-11
EBT00051367160	Phe1(GAA)	80922.3	2.02879	0.321432	6.31174	2.75909e-10	1.05347e-09
EBT00051367353	Gly1(GCC)	101346	-0.277464	0.333569	-0.831804	0.405519	0.448206
EBT00051367609	Gly1(UCC)	3281.29	0.594983	0.376985	1.57827	0.114504	0.150287
EBT00051367683	Thr1(CGU)	9219.72	-0.77945	0.326491	-2.38736	0.01697	0.025455
EBT00051367914	Leu1(CAA)	619.844	-4.68872	0.410483	-11.4224	3.23033e-30	2.71348e-29
EBT00051367983	Leu1(CAG)	2703.7	-2.30253	0.441254	-5.21815	1.80716e-07	4.46474e-07
EBT00051368081	Pro1(UGG)	30939	1.69735	0.314949	5.3893	7.07332e-08	1.85675e-07
EBT00051368205	Leu1(UAG)	1477.42	0.224975	0.368049	0.611263	0.541025	0.568077
EBT00051368279	Gly1(CCC)	5292.16	0.0254693	0.407525	0.0624975	0.950167	0.950167
EBT00051368550	Pro1(CGG)	98532.1	1.37794	0.307189	4.48565	7.26929e-06	1.45386e-05
EBT00051368683	Ser1(GGA)	1385.64	0.780465	0.430967	1.81096	0.0701465	0.0950373
EBT00051369258	His1(GUG)	6991.91	-5.38539	0.292693	-18.3994	1.32761e-75	5.57595e-74
EBT00051369313	Met1(CAU)	130205	2.01583	0.339339	5.94045	2.8424e-09	8.52719e-09
EBT00051369436	fMet1(CAU)	282.273	-0.553665	0.602893	-0.918347	0.358437	0.406875
EBT00051369492	Asn1(GUU)	59422.4	0.434913	0.312597	1.39129	0.164138	0.208903
EBT00051369609	Thr1(GGU)	4401.39	-1.38823	0.391188	-3.54875	0.000387063	0.000692534
EBT00051369657	fMet2(CAU)	926.779	1.41945	0.465957	3.04631	0.00231667	0.00374231
EBT00051369841	Pro1(GGG)	5518.52	1.55369	0.30764	5.05035	4.41006e-07	9.74855e-07
EBT00051369932	Ala1(UGC)	18915.9	1.78556	0.370172	4.82361	1.40982e-06	2.96063e-06
EBT00051369986	Tyr1(GUA)	23691.3	0.580696	0.276416	2.10081	0.0356579	0.0499211
EBT00051370040	Leu1(GAG)	4250.79	-4.94337	0.306235	-16.1424	1.28485e-58	2.6982e-57
EBT00051370091	Ile1(GAU)	14969.4	-2.33252	0.36627	-6.3683	1.91134e-10	8.74102e-10
EBT00051370146	Sec1(UCA)	67.798	-5.84894	0.920336	-6.35523	2.08119e-10	8.74102e-10
EBT00051370188	Gln1(UUG)	7184.07	0.458096	0.370653	1.23592	0.216489	0.259787
