# Supplementary material
Source: HighWire-hosted journal article supplement (doi:10.1101/rna.080004.124)
Supplement: SuppTable9.xlsx [file SuppTable9.xlsx]

## Sheet: Sheet1
Transcript ID	tRNA	mis	l2f
EBT00051365187	Lys1(UUU)	0.0764574	1.98733
EBT00051365422	Cys1(GCA)	0.292397	1.48617
EBT00051365503	Val1(GAC)	0.0225388	-0.915901
EBT00051366161	Thr1(UGU)	0.000698812	-1.97363
EBT00051366399	Val1(UAC)	0.112593	1.41005
EBT00051366465	Ala1(GGC)	0.0968548	2.15107
EBT00051366843	Arg1(ACG)	0.0833718	1.78064
EBT00051366923	Glu1(UUC)	0.00771131	-2.54299
EBT00051367160	Phe1(GAA)	0.0546594	2.02879
EBT00051367983	Leu1(CAG)	0.00526793	-2.30253
EBT00051368081	Pro1(UGG)	0.217633	1.69735
EBT00051368550	Pro1(CGG)	0.133663	1.37794
EBT00051369258	His1(GUG)	0.00393773	-5.38539
EBT00051369609	Thr1(GGU)	0.00256796	-1.38823
EBT00051369841	Pro1(GGG)	0.262493	1.55369
EBT00051369932	Ala1(UGC)	0.227889	1.78556
EBT00051369986	Tyr1(GUA)	0.033195	0.580696
EBT00051370040	Leu1(GAG)	0.0191581	-4.94337
EBT00051370091	Ile1(GAU)	0.00290449	-2.33252
