# Supplementary material
Source: HighWire-hosted journal article supplement (doi:10.1101/rna.080004.124)
Supplement: SuppTable10.xlsx [file SuppTable10.xlsx]

## Sheet: Sheet1
Anticodon	Ec	PA
ACG	0.575085	1.78064
CAA	-0.0693839	-4.68872
CAG	-4.20164	-2.30253
CAU	-0.362815	2.01583
CAU	-1.02342	-0.553665
CAU	-1.27117	1.41945
CCA	-1.11798	-5.48102
CCC	0.477336	0.0254693
CCG	0.437784	0.253617
CCU	0.239158	-5.41329
CGA	0.371713	-0.462448
CGG	-0.231773	1.37794
GAA	0.824611	2.02879
GAC	0.578743	-0.915901
GAG	-3.7695	-4.94337
GAU	-4.98642	-2.33252
GCA	2.19946	1.48617
GCC	-2.20457	-0.277464
GCU	0.764271	-0.178724
GGA	0.838562	0.780465
GGC	1.59823	2.15107
GGG	0.67003	1.55369
GGU	-2.94869	-1.38823
GUA	-0.0421118	0.580696
GUC	-1.27058	-0.780625
GUG	0.25056	-5.38539
GUU	-0.369921	0.434913
UAC	0.753585	1.41005
UAG	1.29127	0.224975
UCC	-3.73246	0.594983
UGA	0.226396	-1.61128
UGC	1.35523	1.78556
UGG	0.281666	1.69735
UGU	0.10138	-1.97363
UUC	-3.10547	-2.54299
UUG	0.621876	0.458096
UUU	-0.880969	1.98733
