# Supplementary material
Source: HighWire-hosted journal article supplement (doi:10.1101/rna.080004.124)
Supplement: SuppTable11.xlsx [file SuppTable11.xlsx]

## Sheet: Sheet1
Modification	Short name
4-thiouridine	s4U
3-(3-amino-3-carboxypropyl)uridine	acp3U
uridine 5-oxyacetic acid	cmo5U
5-methyluridine	m5U
5-methylaminomethyl-2-thiouridine	mnm5s2U
queuosine	Q
pseudouridine	Y
uridine 5-oxyacetic acid methyl ester	mcmo5U
N4-acetylcytidine	ac4c
1-methylguanosine	m1G
2'-O-methyluridine	Um
5-carbamoylmethyl-2-thiouridine	ncm5s2U
N6-methyl-N6-threonylcarbamoyladenosine	m6t6A
dihydrouridine	D
2'-O-methylcytidine	Cm
7-methylguanosine	m7G
N6-threonylcarbamoyladenosine	t6A
5-carboxymethylaminomethyl-2-thiouridine	cmnm5s2U
glutamyl-queuosine	gluQ
N6-methyladenosine	m6A
2-thiocytidine	s2C
2'-O-methylguanosine	Gm
2-methyladenosine	m2A
2-methylthio-N6-isopentenyladenosine	ms2i6A
2-lysidine	k2C
5-methylaminomethyluridine	mnm5U
5-carboxymethylaminomethyl-2'-O-methyluridine	cmnm5Um
