# Supplementary material
Source: HighWire-hosted journal article supplement (doi:10.1101/rna.080004.124)
Supplement: SuppTable13.xlsx [file SuppTable13.xlsx]

## Sheet: Sheet1
Transcript ID_PA	tRNA	ref_base	Annot. Pos	Region	AC	Wt Misincorporation Freq.	Wt Avg. Depth	Wt Term. Score	Mut Misincorporation Freq.	Mut Avg. Depth	Mut Term. Score
EBT00051364934	Ser1(CGA)	G	1	Acc-stem	CGA	0	20756	0.00657307	0	16848.7	0.00724737
EBT00051364934	Ser1(CGA)	G	2	Acc-stem	CGA	0	20893.3	0.00566334	0	16971.7	0.00589648
EBT00051364934	Ser1(CGA)	A	3	Acc-stem	CGA	0	21012.3	0.00338335	0	17072.3	0.00315304
EBT00051364934	Ser1(CGA)	G	4	Acc-stem	CGA	5.40E-04	21083.7	0	1.35E-04	17126.3	0
EBT00051364934	Ser1(CGA)	A	5	Acc-stem	CGA	1.70E-04	19708.7	0.0701266	1.19E-04	16044	0.0694635
EBT00051364934	Ser1(CGA)	G	6	Acc-stem	CGA	6.01E-04	21195	0	4.38E-04	17241.7	0
EBT00051364934	Ser1(CGA)	A	7	Acc-stem	CGA	1.08E-04	18257.3	0.151479	1.02E-04	14671.7	0.161044
EBT00051364934	Ser1(CGA)	T	8	In between	CGA	0.0194231	21516.7	0.00407319	0.0111547	17488	0.00271827
EBT00051364934	Ser1(CGA)	G	9	In between	CGA	0.00501995	21604.7	0.0130499	0.00208221	17535.7	0.00924705
EBT00051364934	Ser1(CGA)	C	10	D-stem	CGA	0.00101385	21890.3	0.00258198	0.00168165	17699.3	0.00313527
EBT00051364934	Ser1(CGA)	C	11	D-stem	CGA	6.80E-04	21947	0	0.00188607	17755	0
EBT00051364934	Ser1(CGA)	G	12	D-stem	CGA	0.00171393	21935.3	8.35E-04	0.00136726	17745.7	0
EBT00051364934	Ser1(CGA)	G	13	D-stem	CGA	0.00154618	21953.7	0.00926636	0.00113804	17744	0.00888119
EBT00051364934	Ser1(CGA)	A	14	D-loop	CGA	3.02E-04	22159	0.00447766	1.76E-04	17903	0.00398709
EBT00051364934	Ser1(CGA)	G	15	D-loop	CGA	0.00684921	22258.7	0.00975769	0.00479748	17974.7	0.00949652
EBT00051364934	Ser1(CGA)	T	16	D-loop	CGA	6.68E-04	22478	0.00115535	5.79E-04	18147	0.00141238
EBT00051364934	Ser1(CGA)	G	18	D-loop	CGA	8.76E-04	22504	0.00918724	4.96E-04	18172.7	0.00697619
EBT00051364934	Ser1(CGA)	G	19	D-loop	CGA	0.00167684	22712.7	0.0268919	8.98E-04	18300.3	0.0221743
EBT00051364934	Ser1(CGA)	T	20	D-loop	CGA	5.39E-04	23340.3	0	7.40E-04	18715.3	0.00113859
EBT00051364934	Ser1(CGA)	C	20a	D-loop	CGA	6.31E-04	23333.3	0.00159744	0.00109693	18736.7	9.60E-04
EBT00051364934	Ser1(CGA)	G	20b	D-loop	CGA	0.00196217	23370.7	0	0.00120481	18754.7	0
EBT00051364934	Ser1(CGA)	A	21	D-loop	CGA	3.03E-04	22798.3	0.0191453	4.18E-04	18267	0.0173045
EBT00051364934	Ser1(CGA)	A	22	D-stem	CGA	1.99E-04	23243.3	0.0254368	2.06E-04	18588.7	0.029532
EBT00051364934	Ser1(CGA)	C	23	D-stem	CGA	3.96E-04	23850	0	8.64E-04	19154.3	0
EBT00051364934	Ser1(CGA)	G	24	D-stem	CGA	0.00205217	23771.7	0.00446709	7.99E-04	19097.3	0.00158584
EBT00051364934	Ser1(CGA)	G	25	D-stem	CGA	0.00430451	23878.3	0.00700028	0.0021335	19127.7	0.00528706
EBT00051364934	Ser1(CGA)	G	26	In between	CGA	0.0103598	24046.7	0.0302851	0.00472078	19229.3	0.0227673
EBT00051364934	Ser1(CGA)	A	27	Ac-stem	CGA	2.83E-04	24797.7	0.00318902	3.21E-04	19677.3	0.00192743
EBT00051364934	Ser1(CGA)	C	28	Ac-stem	CGA	8.40E-04	24877	0.00160533	9.63E-04	19715.3	9.97E-04
EBT00051364934	Ser1(CGA)	G	29	Ac-stem	CGA	0.00277508	24917	0.00220247	0.00172301	19735	0.00261119
EBT00051364934	Ser1(CGA)	G	30	Ac-stem	CGA	3.60E-04	24972	4.54E-04	4.25E-04	19786.7	0
EBT00051364934	Ser1(CGA)	A	31	Ac-stem	CGA	0.00183841	24983.3	0.00939718	0.00154169	19765	0.00967031
EBT00051364934	Ser1(CGA)	T	32	Ac-loop	CGA	1.23E-04	25220.3	0.0103205	1.71E-04	19958	0.0115887
EBT00051364934	Ser1(CGA)	T	33	Ac-loop	CGA	3.45E-04	25483.3	0	2.23E-04	20192	4.79E-04
EBT00051364934	Ser1(CGA)	C	34	Ac-loop	CGA	0.00112665	25483	0.00371413	6.96E-04	20201.7	0.00289564
EBT00051364934	Ser1(CGA)	G	35	Ac-loop	CGA	4.87E-04	25578	0.00907835	4.13E-04	20260.3	0.00715464
EBT00051364934	Ser1(CGA)	A	36	Ac-loop	CGA	6.69E-04	25812.3	0	5.32E-04	20406.3	0
EBT00051364934	Ser1(CGA)	A	37	Ac-loop	CGA	0.00178839	25603.3	0.0967249	0.00196867	20195.3	0.0938243
EBT00051364934	Ser1(CGA)	A	38	Ac-loop	CGA	1.04E-04	28345	0.0152059	1.60E-04	22286.3	0.013719
EBT00051364934	Ser1(CGA)	T	39	Ac-stem	CGA	2.70E-04	28782.7	0	1.01E-04	22596.3	7.96E-04
EBT00051364934	Ser1(CGA)	C	40	Ac-stem	CGA	3.13E-04	28769	9.15E-04	7.19E-04	22614.3	0
EBT00051364934	Ser1(CGA)	C	41	Ac-stem	CGA	4.99E-04	28795.3	0.00180259	8.88E-04	22609.3	0.00150155
EBT00051364934	Ser1(CGA)	G	42	Ac-stem	CGA	0.00138277	28847.3	0.00702205	0.00113094	22643.3	0.00218863
EBT00051364934	Ser1(CGA)	T	43	Ac-stem	CGA	2.63E-04	29051.3	0.00283746	2.90E-04	22693	0.00288535
EBT00051364934	Ser1(CGA)	T	44	In between	CGA	2.86E-04	29134	9.03E-04	2.19E-04	22758.7	0.00201713
EBT00051364934	Ser1(CGA)	G	V1	V-region	CGA	0.00272122	29160.3	0.00746548	0.00171248	22804.7	0.00398905
EBT00051364934	Ser1(CGA)	A	V2	V-region	CGA	5.70E-05	29379.7	0.00209456	8.38E-05	22896	0.00229498
EBT00051364934	Ser1(CGA)	G	V3	V-region	CGA	3.71E-04	29441.3	0	1.75E-04	22948.7	0
EBT00051364934	Ser1(CGA)	T	V4	V-region	CGA	2.39E-04	29392	0.00742942	2.31E-04	22888.7	0.00761638
EBT00051364934	Ser1(CGA)	C	V5	V-region	CGA	6.22E-04	29612	0.00784025	9.52E-04	23064.3	0.00811365
EBT00051364934	Ser1(CGA)	A	V6	V-region	CGA	2.43E-04	29846	0	3.94E-04	23253	0
EBT00051364934	Ser1(CGA)	G	V8	V-region	CGA	8.85E-04	29789	0	6.91E-04	23191.3	0
EBT00051364934	Ser1(CGA)	C	V9	V-region	CGA	3.32E-04	29669.7	0.0163447	7.01E-04	23117	0.0131905
EBT00051364934	Ser1(CGA)	A	V10	V-region	CGA	3.19E-04	30162.7	0.0076438	4.54E-04	23426	0.00719059
EBT00051364934	Ser1(CGA)	A	V11	V-region	CGA	1.52E-04	30395	0	2.19E-04	23595.7	0
EBT00051364934	Ser1(CGA)	T	V14	V-region	CGA	2.73E-04	30205	0.0014766	2.84E-04	23480.7	0
EBT00051364934	Ser1(CGA)	G	V15	V-region	CGA	9.50E-04	30249.7	0.00199054	6.28E-04	23454	0.00192913
EBT00051364934	Ser1(CGA)	G	V16	V-region	CGA	3.30E-04	30310	0.00263245	1.52E-04	23499.3	0.00256087
EBT00051364934	Ser1(CGA)	C	V17	V-region	CGA	5.13E-04	30390	0	0.0012525	23559.7	0
EBT00051364934	Ser1(CGA)	T	V18	V-region	CGA	2.40E-04	30346	0.00698095	2.44E-04	23533.7	0.00578775
EBT00051364934	Ser1(CGA)	C	V19	V-region	CGA	5.87E-04	30559.3	0	0.00156344	23670.7	0
EBT00051364934	Ser1(CGA)	C	48	V-region	CGA	4.87E-04	30473.7	0	9.68E-04	23622.3	0
EBT00051364934	Ser1(CGA)	T	49	T-stem	CGA	3.58E-04	30272	0.0156621	2.64E-04	23509.7	0.0146829
EBT00051364934	Ser1(CGA)	A	50	T-stem	CGA	2.04E-04	30753.7	0	1.50E-04	23860	0
EBT00051364934	Ser1(CGA)	G	51	T-stem	CGA	0.00179628	30696	0	7.97E-04	23813	0
EBT00051364934	Ser1(CGA)	G	52	T-stem	CGA	0.0017121	30667.7	0.00193098	9.39E-04	23794.3	0.00160844
EBT00051364934	Ser1(CGA)	G	53	T-stem	CGA	3.49E-04	30727	0	3.42E-04	23832.7	0
EBT00051364934	Ser1(CGA)	T	54	T-loop	CGA	2.06E-04	30696	0.00244817	2.76E-04	23791.3	0.0026689
EBT00051364934	Ser1(CGA)	T	55	T-loop	CGA	1.91E-04	30771.3	0	1.35E-04	23855	0
EBT00051364934	Ser1(CGA)	C	56	T-loop	CGA	5.71E-04	30736.7	0	0.0011208	23823.7	0
EBT00051364934	Ser1(CGA)	A	57	T-loop	CGA	5.91E-04	28463.3	0.0779713	5.72E-04	21993.3	0.0806103
EBT00051364934	Ser1(CGA)	A	58	T-loop	CGA	3.05E-04	30870.3	0	1.84E-04	23921.7	0
EBT00051364934	Ser1(CGA)	A	59	T-loop	CGA	7.42E-05	30548.7	0	8.94E-05	23657.3	0
EBT00051364934	Ser1(CGA)	T	60	T-loop	CGA	1.99E-04	30402.3	0.00880272	1.62E-04	23592	0.00826724
EBT00051364934	Ser1(CGA)	C	61	T-stem	CGA	5.25E-04	30672.3	0	8.92E-04	23788.7	0
EBT00051364934	Ser1(CGA)	C	62	T-stem	CGA	6.66E-04	30619.3	0.0036661	7.65E-04	23733.3	0.00500294
EBT00051364934	Ser1(CGA)	C	63	T-stem	CGA	4.37E-04	30732	0	6.06E-04	23852.7	0
EBT00051364934	Ser1(CGA)	T	64	T-stem	CGA	2.00E-04	30588	0	2.39E-04	23723.7	0
EBT00051364934	Ser1(CGA)	A	65	T-stem	CGA	9.93E-05	30560.7	0	5.19E-05	23707.7	0
EBT00051364934	Ser1(CGA)	T	66	Acc-stem	CGA	1.94E-04	30107	0.0173635	3.22E-04	23441	0.0147667
EBT00051364934	Ser1(CGA)	C	67	Acc-stem	CGA	0.00105184	30639	0	0.00196003	23792.3	0
EBT00051364934	Ser1(CGA)	T	68	Acc-stem	CGA	3.28E-04	20299.7	0.327395	3.47E-04	14953.7	0.360909
EBT00051364934	Ser1(CGA)	C	69	Acc-stem	CGA	4.15E-04	30180.7	0	8.17E-04	23398.3	0
EBT00051364934	Ser1(CGA)	T	70	Acc-stem	CGA	3.47E-04	28036.7	0.0569042	4.76E-04	21599.3	0.0629627
EBT00051364934	Ser1(CGA)	C	71	Acc-stem	CGA	3.34E-04	29728.3	0.0172777	6.26E-04	23050.7	0.0143953
EBT00051364934	Ser1(CGA)	C	72	Acc-stem	CGA	4.40E-04	30251	0	3.41E-04	23387.3	0.00121002
EBT00051364934	Ser1(CGA)	G	73	In between	CGA	0.00393419	30125.3	0.0203037	0.00289499	23415.7	0.0175794
EBT00051364934	Ser1(CGA)	C	74	CCA	CGA	3.34E-05	30749.7	0	6.19E-05	23834.7	0
EBT00051364934	Ser1(CGA)	C	75	CCA	CGA	0	29727.3	0	0	22887.7	0
EBT00051364934	Ser1(CGA)	A	76	CCA	CGA	0	28004.3	0	0	20951	0
EBT00051365018	Ser1(UGA)	G	1	Acc-stem	UGA	0	4955.33	0.00787507	0	3659.33	0.00633599
EBT00051365018	Ser1(UGA)	G	2	Acc-stem	UGA	0	4994.67	0.00445153	0	3682.67	0.00387702
EBT00051365018	Ser1(UGA)	A	3	Acc-stem	UGA	0	5017	0.00607541	0	3697	0.00662786
EBT00051365018	Ser1(UGA)	G	4	Acc-stem	UGA	2.00E-04	5047.67	0.00151655	3.52E-04	3721.67	0
EBT00051365018	Ser1(UGA)	G	5	Acc-stem	UGA	1.93E-04	5055.33	0.00694081	0	3721	0.00711554
EBT00051365018	Ser1(UGA)	T	6	Acc-stem	UGA	4.57E-04	5090.67	0.00624675	2.10E-04	3747.67	0.00741591
EBT00051365018	Ser1(UGA)	G	7	Acc-stem	UGA	0.00355085	5122.67	0.00227229	0.00202602	3775.67	0
EBT00051365018	Ser1(UGA)	T	8	In between	UGA	0.0287211	5134.33	0.01009	0.0189961	3761.33	0.0109563
EBT00051365018	Ser1(UGA)	G	9	In between	UGA	0.0114992	5186.67	0.0206445	0.00799451	3803	0.0221975
EBT00051365018	Ser1(UGA)	G	10	D-stem	UGA	0.0121671	5296	0.0246178	0.0101226	3889.33	0.0353836
EBT00051365018	Ser1(UGA)	C	11	D-stem	UGA	0.00104548	5429.67	0.00202181	0.00148105	4032	0.00534496
EBT00051365018	Ser1(UGA)	C	12	D-stem	UGA	0.00108853	5440.67	0.00826346	0.00188874	4053.67	0.00474671
EBT00051365018	Ser1(UGA)	G	13	D-stem	UGA	0.00210854	5486	0.00151671	0.00104531	4073	0.00277483
EBT00051365018	Ser1(UGA)	A	14	D-loop	UGA	3.23E-04	5494.33	0.0117513	5.53E-04	4084.33	0.00969854
EBT00051365018	Ser1(UGA)	G	15	D-loop	UGA	0.00653507	5559.67	0.00973698	0.00351046	4124.33	0.0115044
EBT00051365018	Ser1(UGA)	T	16	D-loop	UGA	5.18E-04	5614.33	0.00637131	3.82E-04	4172.33	0.00492885
EBT00051365018	Ser1(UGA)	G	18	D-loop	UGA	4.55E-04	5650.33	0.0152783	5.01E-04	4193	0.0184925
EBT00051365018	Ser1(UGA)	G	19	D-loop	UGA	5.06E-04	5738	0.0630817	1.41E-04	4272	0.0622668
EBT00051365018	Ser1(UGA)	T	20	D-loop	UGA	2.71E-04	6124.33	0.0373572	5.38E-04	4555.67	0.0333145
EBT00051365018	Ser1(UGA)	T	20a	D-loop	UGA	1.58E-04	6362	0.0316099	2.22E-04	4712.67	0.0423356
EBT00051365018	Ser1(UGA)	T	20b	D-loop	UGA	2.53E-04	6569.67	0.00192434	1.23E-04	4921	0.00639386
EBT00051365018	Ser1(UGA)	A	21	D-loop	UGA	6.90E-04	6582.33	0.00111285	2.80E-04	4952.67	9.41E-04
EBT00051365018	Ser1(UGA)	A	22	D-stem	UGA	9.60E-05	6589.67	0.00347817	1.58E-04	4957.33	0.00321716
EBT00051365018	Ser1(UGA)	G	23	D-stem	UGA	0.00152615	6612.67	2.02E-04	0.00116329	4973.33	4.69E-04
EBT00051365018	Ser1(UGA)	G	24	D-stem	UGA	6.79E-04	6614	0.00581221	4.50E-04	4975.67	0.00473396
EBT00051365018	Ser1(UGA)	C	25	D-stem	UGA	9.02E-04	6652.67	0.0159748	0.00227095	4999.33	0.0181342
EBT00051365018	Ser1(UGA)	A	26	In between	UGA	5.18E-04	6760.67	0.00661214	4.97E-04	5091.67	0.0101737
EBT00051365018	Ser1(UGA)	A	27	Ac-stem	UGA	4.50E-05	6805.67	0	5.56E-04	5144	0
EBT00051365018	Ser1(UGA)	C	28	Ac-stem	UGA	8.40E-04	6773.33	0.00679408	5.75E-04	5117	0.00627913
EBT00051365018	Ser1(UGA)	G	29	Ac-stem	UGA	0.00615998	6819.67	0.0103038	0.00819368	5149.33	0.0154866
EBT00051365018	Ser1(UGA)	G	30	Ac-stem	UGA	0.00210019	6890.67	0.0155253	4.36E-04	5230.33	0.0130826
EBT00051365018	Ser1(UGA)	T	31	Ac-stem	UGA	2.39E-04	6999.33	0	2.92E-04	5299.67	0
EBT00051365018	Ser1(UGA)	C	32	Ac-loop	UGA	5.95E-04	6943	0.0191656	5.77E-04	5265.33	0.0163159
EBT00051365018	Ser1(UGA)	T	33	Ac-loop	UGA	3.31E-04	7078.67	0.00216145	8.31E-05	5352.67	0.00655778
EBT00051365018	Ser1(UGA)	T	34	Ac-loop	UGA	0.00113142	7094	0.00402471	0.00140076	5388	0.00363681
EBT00051365018	Ser1(UGA)	G	35	Ac-loop	UGA	0.00253669	7122.67	0.0187362	5.85E-04	5407.67	0.0116364
EBT00051365018	Ser1(UGA)	A	36	Ac-loop	UGA	4.21E-04	7258.67	0.0212154	8.17E-04	5471.33	0.014411
EBT00051365018	Ser1(UGA)	A	37	Ac-loop	UGA	0.00753315	7416	0.273036	0.00950455	5551.33	0.254187
EBT00051365018	Ser1(UGA)	A	38	Ac-loop	UGA	5.63E-04	10201.3	0.00299713	1.16E-04	7443.33	0
EBT00051365018	Ser1(UGA)	A	39	Ac-stem	UGA	4.21E-04	10232	0.00967867	1.87E-04	7437.33	0.0140521
EBT00051365018	Ser1(UGA)	C	40	Ac-stem	UGA	4.07E-04	10332	0.0067613	1.49E-04	7543.33	0.00531845
EBT00051365018	Ser1(UGA)	C	41	Ac-stem	UGA	4.85E-04	10402.3	0.00551307	3.95E-04	7583.67	0.00284888
EBT00051365018	Ser1(UGA)	G	42	Ac-stem	UGA	0.00213193	10460	0.0162084	4.32E-04	7605.33	0.0131061
EBT00051365018	Ser1(UGA)	T	43	Ac-stem	UGA	1.89E-04	10632.3	0	1.12E-04	7706.33	0
EBT00051365018	Ser1(UGA)	C	44	In between	UGA	6.88E-04	10593.7	0.00644012	9.17E-04	7677	0.00552701
EBT00051365018	Ser1(UGA)	G	V1	V-region	UGA	0.00432348	10662.3	0	0.00286839	7719.67	0
EBT00051365018	Ser1(UGA)	A	V2	V-region	UGA	2.93E-04	9857.33	0.088072	2.53E-04	7086.67	0.092655
EBT00051365018	Ser1(UGA)	A	V3	V-region	UGA	1.16E-04	10809.3	0	3.09E-04	7810.33	0
EBT00051365018	Ser1(UGA)	G	V4	V-region	UGA	0.00220344	10746.7	0.00634901	0.00172894	7784.33	0
EBT00051365018	Ser1(UGA)	G	V5	V-region	UGA	0.00275735	10815.3	0.00359304	0.00189092	7783.33	0.00545191
EBT00051365018	Ser1(UGA)	G	V6	V-region	UGA	0.00231048	10854.3	0.00361066	8.07E-04	7826	0.00284562
EBT00051365018	Ser1(UGA)	G	V8	V-region	UGA	0.00326648	10893.7	0.00511431	0.00102589	7848.33	0.00624657
EBT00051365018	Ser1(UGA)	A	V9	V-region	UGA	2.60E-04	10949.7	0	1.75E-04	7897.67	0
EBT00051365018	Ser1(UGA)	G	V10	V-region	UGA	7.98E-04	10945.7	0	5.45E-04	7893.33	0
EBT00051365018	Ser1(UGA)	A	V11	V-region	UGA	2.95E-05	10540	0.040102	3.50E-04	7586.67	0.0399865
EBT00051365018	Ser1(UGA)	C	V14	V-region	UGA	4.80E-04	10980.3	0.00552469	4.75E-04	7902.67	0.00466015
EBT00051365018	Ser1(UGA)	T	V15	V-region	UGA	3.62E-04	11041.3	3.32E-04	1.93E-04	7939.67	0
EBT00051365018	Ser1(UGA)	C	V16	V-region	UGA	7.58E-04	11045	0.00387807	8.16E-04	7935.33	0.00368293
EBT00051365018	Ser1(UGA)	T	V17	V-region	UGA	2.49E-04	11088	0.00177055	4.29E-04	7964.67	0.00279621
EBT00051365018	Ser1(UGA)	T	V18	V-region	UGA	2.40E-04	11107.7	0	3.25E-04	7987	0
EBT00051365018	Ser1(UGA)	C	V19	V-region	UGA	4.39E-04	11029	0.00520144	0.0016266	7936.33	0.0062607
EBT00051365018	Ser1(UGA)	C	48	V-region	UGA	4.40E-04	11086.7	0.00150105	0.00120169	7986.33	4.59E-04
EBT00051365018	Ser1(UGA)	G	49	T-stem	UGA	0.00107589	11103.3	0	5.46E-04	7990	0.00158281
EBT00051365018	Ser1(UGA)	T	50	T-stem	UGA	1.27E-04	11102.3	0.00266499	2.05E-04	8002.67	0.00141419
EBT00051365018	Ser1(UGA)	G	51	T-stem	UGA	0.00204115	11132	0	7.37E-04	8014	0
EBT00051365018	Ser1(UGA)	A	52	T-stem	UGA	1.22E-04	10822.7	0.029067	4.09E-04	7798	0.027317
EBT00051365018	Ser1(UGA)	G	53	T-stem	UGA	0.00149565	11146.7	0	6.49E-04	8017	0
EBT00051365018	Ser1(UGA)	T	54	T-loop	UGA	3.02E-04	11140.7	0.00244747	2.54E-04	8012.67	0.00211715
EBT00051365018	Ser1(UGA)	T	55	T-loop	UGA	1.49E-04	11168	0	4.20E-04	8029.67	0
EBT00051365018	Ser1(UGA)	C	56	T-loop	UGA	7.24E-04	11126.7	0.00239091	7.81E-04	8004	0.00261682
EBT00051365018	Ser1(UGA)	G	57	T-loop	UGA	0.00288004	11153.3	0.00502542	0.00123219	8025	0.00467174
EBT00051365018	Ser1(UGA)	A	58	T-loop	UGA	5.31E-04	11209.7	0	4.28E-04	8062.67	0
EBT00051365018	Ser1(UGA)	A	59	T-loop	UGA	1.75E-04	11142.7	0	3.27E-05	8012	0
EBT00051365018	Ser1(UGA)	T	60	T-loop	UGA	2.10E-04	11059	0.00294515	4.23E-05	7951	0.00504713
EBT00051365018	Ser1(UGA)	C	61	T-stem	UGA	4.08E-04	11091.7	0	4.92E-04	7991.33	0
EBT00051365018	Ser1(UGA)	T	62	T-stem	UGA	9.66E-05	10400	0.0663994	3.63E-04	7578.33	0.0541665
EBT00051365018	Ser1(UGA)	C	63	T-stem	UGA	0.00110846	11139.7	0.0054757	0.00255141	8012.33	0.00525575
EBT00051365018	Ser1(UGA)	A	64	T-stem	UGA	8.05E-04	11201	0	3.83E-04	8054.67	0
EBT00051365018	Ser1(UGA)	C	65	T-stem	UGA	9.81E-04	11045	0	0.00139144	7945	0
EBT00051365018	Ser1(UGA)	C	66	Acc-stem	UGA	6.67E-04	10956.7	0.00883515	9.44E-04	7847.67	0.0141535
EBT00051365018	Ser1(UGA)	G	67	Acc-stem	UGA	6.42E-04	11054.3	0.00937957	6.12E-04	7960.33	0.00838766
EBT00051365018	Ser1(UGA)	C	68	Acc-stem	UGA	7.75E-04	11159	0	0.00101176	8027.67	0
EBT00051365018	Ser1(UGA)	C	69	Acc-stem	UGA	6.51E-04	11108	0	9.23E-04	7979	0
EBT00051365018	Ser1(UGA)	T	70	Acc-stem	UGA	9.31E-05	10800.3	0.012556	5.86E-04	7777.67	0.0110202
EBT00051365018	Ser1(UGA)	C	71	Acc-stem	UGA	5.13E-04	10937.7	0.00693057	6.85E-04	7864.33	0.00472474
EBT00051365018	Ser1(UGA)	C	72	Acc-stem	UGA	4.33E-04	11014	0	5.27E-04	7901.67	0
EBT00051365018	Ser1(UGA)	G	73	In between	UGA	0.00583074	10965	0.0177958	0.00431977	7897	0.0151729
EBT00051365018	Ser1(UGA)	C	74	CCA	UGA	3.30E-05	11163.7	0	0	8018.67	0
EBT00051365018	Ser1(UGA)	C	75	CCA	UGA	0	10721	0	0	7663	0
EBT00051365018	Ser1(UGA)	A	76	CCA	UGA	0	9984.67	0	0	6867.67	0
EBT00051365099	Met3(CAU)	G	1	Acc-stem	CAU	NA	91	NA	NA	81	NA
EBT00051365099	Met3(CAU)	G	2	Acc-stem	CAU	NA	92.3333	NA	NA	79.6667	NA
EBT00051365099	Met3(CAU)	G	3	Acc-stem	CAU	NA	93	NA	NA	80.6667	NA
EBT00051365099	Met3(CAU)	C	4	Acc-stem	CAU	NA	92	NA	NA	82.3333	NA
EBT00051365099	Met3(CAU)	C	5	Acc-stem	CAU	NA	94	NA	NA	81.6667	NA
EBT00051365099	Met3(CAU)	T	6	Acc-stem	CAU	NA	95.3333	NA	NA	84	NA
EBT00051365099	Met3(CAU)	A	7	Acc-stem	CAU	NA	95	NA	NA	83	NA
EBT00051365099	Met3(CAU)	T	8	In between	CAU	NA	96	NA	NA	87.3333	NA
EBT00051365099	Met3(CAU)	A	9	In between	CAU	NA	97	NA	NA	86.6667	NA
EBT00051365099	Met3(CAU)	G	10	D-stem	CAU	NA	97	NA	NA	88.3333	NA
EBT00051365099	Met3(CAU)	C	11	D-stem	CAU	NA	96.6667	NA	NA	89	NA
EBT00051365099	Met3(CAU)	T	12	D-stem	CAU	0	102.667	0	NA	91	NA
EBT00051365099	Met3(CAU)	C	13	D-stem	CAU	0	102	0	NA	88.6667	NA
EBT00051365099	Met3(CAU)	A	14	D-loop	CAU	0.00280112	101	0.0162338	NA	90	NA
EBT00051365099	Met3(CAU)	G	15	D-loop	CAU	0	102.667	0.0464396	NA	94	NA
EBT00051365099	Met3(CAU)	T	16	D-loop	CAU	0	107.667	0.00308642	NA	95.6667	NA
EBT00051365099	Met3(CAU)	C	17	D-loop	CAU	0	108	0.00917431	NA	95.6667	NA
EBT00051365099	Met3(CAU)	G	18	D-loop	CAU	0	109	0.0120846	NA	95.6667	NA
EBT00051365099	Met3(CAU)	G	19	D-loop	CAU	0.00350877	110.333	0.0377907	0	100.667	0.0848485
EBT00051365099	Met3(CAU)	T	20	D-loop	CAU	0	114.667	0.0171429	0.0175112	110	0.0149254
EBT00051365099	Met3(CAU)	T	20a	D-loop	CAU	0	116.667	0	0	111.667	0.00593472
EBT00051365099	Met3(CAU)	A	21	D-loop	CAU	0	116.667	0.00849858	0	112.333	0.0174927
EBT00051365099	Met3(CAU)	G	22	D-stem	CAU	0	117.667	0	0	114.333	0
EBT00051365099	Met3(CAU)	A	23	D-stem	CAU	0	109	0.0762712	0	107.667	0.0849858
EBT00051365099	Met3(CAU)	G	24	D-stem	CAU	0.0058997	118	0	0	117.667	0.0056338
EBT00051365099	Met3(CAU)	C	25	D-stem	CAU	0	118	0.0193906	0.00208333	118.333	0.00560224
EBT00051365099	Met3(CAU)	A	26	In between	CAU	0	120.333	0.00276243	0	119	0.00833333
EBT00051365099	Met3(CAU)	G	27	Ac-stem	CAU	0.019204	120.667	0.00549451	0	120	0
EBT00051365099	Met3(CAU)	A	28	Ac-stem	CAU	0	121.333	0.026738	0	119	0.027248
EBT00051365099	Met3(CAU)	G	29	Ac-stem	CAU	0	124.667	0.239837	0	122.333	0.300952
EBT00051365099	Met3(CAU)	G	30	Ac-stem	CAU	0	164	0.616822	0	175	0.686941
EBT00051365099	Met3(CAU)	A	31	Ac-stem	CAU	0	428	0	0	559	0
EBT00051365099	Met3(CAU)	C	32	Ac-loop	CAU	0	412	0.242647	0.0031348	498	0.291943
EBT00051365099	Met3(CAU)	T	33	Ac-loop	CAU	0.00298057	544	0.60292	0.00318981	703.333	0.662346
EBT00051365099	Met3(CAU)	C	34	Ac-loop	CAU	0.143725	1370	0.86183	0.121409	2083	0.863269
EBT00051365099	Met3(CAU)	A	35	Ac-loop	CAU	2.90E-05	9915.33	0.0458992	1.65E-04	15234.3	0.0497744
EBT00051365099	Met3(CAU)	T	36	Ac-loop	CAU	0	10392.3	0	0	16032.3	0
EBT00051365099	Met3(CAU)	A	37	Ac-loop	CAU	2.63E-04	10233.7	0.0304131	4.12E-04	15802.7	0.0372251
EBT00051365099	Met3(CAU)	A	38	Ac-loop	CAU	8.18E-04	10554.7	0.0103454	7.12E-04	16413.7	0.0141745
EBT00051365099	Met3(CAU)	T	39	Ac-stem	CAU	9.49E-05	10665	0.00218307	2.22E-04	16649.7	0.00223727
EBT00051365099	Met3(CAU)	C	40	Ac-stem	CAU	8.69E-04	10688.3	0	6.73E-04	16687	0
EBT00051365099	Met3(CAU)	C	41	Ac-stem	CAU	8.78E-04	10670	0.00694918	5.52E-04	16654.7	0.00786338
EBT00051365099	Met3(CAU)	T	42	Ac-stem	CAU	9.42E-05	10744.7	0	2.73E-04	16786.7	0
EBT00051365099	Met3(CAU)	T	43	Ac-stem	CAU	1.24E-04	10702.7	0	2.87E-04	16740.3	0
EBT00051365099	Met3(CAU)	T	44	V-region	CAU	4.96E-04	10612.7	0.00701743	5.70E-04	16652	0.00501912
EBT00051365099	Met3(CAU)	G	45	V-region	CAU	1.76E-04	10687.7	0.00727599	3.81E-04	16736	0
EBT00051365099	Met3(CAU)	G	46	V-region	CAU	1.45E-04	10766	0.121693	0.00343577	16720.7	0.00700768
EBT00051365099	Met3(CAU)	T	47	V-region	CAU	0.383703	12257.7	0.0504558	3.66E-04	16838.7	0
EBT00051365099	Met3(CAU)	C	48	V-region	CAU	4.99E-04	12909	0	0.00119061	16796.3	0
EBT00051365099	Met3(CAU)	C	49	T-stem	CAU	2.19E-04	12892.3	0.016328	0.00105893	16673.3	0.017559
EBT00051365099	Met3(CAU)	A	50	T-stem	CAU	3.06E-04	13106.3	0.00268865	1.14E-04	16971.3	2.75E-04
EBT00051365099	Met3(CAU)	C	51	T-stem	CAU	3.72E-04	13141.7	0	6.18E-04	16976	0
EBT00051365099	Met3(CAU)	G	52	T-stem	CAU	0.00166748	13122	4.06E-04	5.30E-04	16947	4.33E-04
EBT00051365099	Met3(CAU)	G	53	T-stem	CAU	0.00182083	13127.3	0.00517847	0.0011026	16954.3	0.0046964
EBT00051365099	Met3(CAU)	T	54	T-loop	CAU	4.44E-05	13195.7	0.00100941	1.63E-04	17034.3	0
EBT00051365099	Met3(CAU)	T	55	T-loop	CAU	0	13209	0	0	17034.3	0
EBT00051365099	Met3(CAU)	C	56	T-loop	CAU	7.28E-05	13160.3	0.00204742	1.90E-04	16969.3	0.0024103
EBT00051365099	Met3(CAU)	G	57	T-loop	CAU	0.0012016	13187.3	0	9.10E-04	17010.3	0
EBT00051365099	Met3(CAU)	A	58	T-loop	CAU	1.46E-04	13094	0.00745382	1.85E-04	16848.7	0.00973689
EBT00051365099	Met3(CAU)	G	59	T-loop	CAU	0.00113266	13192.3	8.33E-04	0.0025853	17014.3	7.63E-04
EBT00051365099	Met3(CAU)	T	60	T-loop	CAU	1.45E-04	13203.3	0	3.51E-04	17027.3	0
EBT00051365099	Met3(CAU)	C	61	T-stem	CAU	2.14E-04	13189.7	0	4.63E-04	17016.7	0
EBT00051365099	Met3(CAU)	C	62	T-stem	CAU	1.50E-04	13129	0.00321405	3.56E-04	16913.7	0.00418024
EBT00051365099	Met3(CAU)	G	63	T-stem	CAU	0.00140474	13171.3	0.00214652	0.00250868	16984.7	0.00105866
EBT00051365099	Met3(CAU)	T	64	T-stem	CAU	8.87E-05	13199.7	0	3.13E-04	17002.7	0
EBT00051365099	Met3(CAU)	G	65	T-stem	CAU	0.00293271	13177.3	7.58E-04	0.003729	16987.3	6.86E-04
EBT00051365099	Met3(CAU)	T	66	Acc-stem	CAU	5.04E-05	13187.3	0	2.75E-04	16999	0
EBT00051365099	Met3(CAU)	G	67	Acc-stem	CAU	0.00117678	13146.3	0.00361275	5.77E-04	16954	0.00311636
EBT00051365099	Met3(CAU)	G	68	Acc-stem	CAU	8.89E-04	13194	0.00143798	7.29E-04	17007	0.00115505
EBT00051365099	Met3(CAU)	G	69	Acc-stem	CAU	5.03E-04	13213	0	5.08E-04	17026.7	0
EBT00051365099	Met3(CAU)	C	70	Acc-stem	CAU	9.12E-04	13182	0	0.00240623	17011	0
EBT00051365099	Met3(CAU)	C	71	Acc-stem	CAU	8.58E-04	13173	4.30E-04	0.00113999	16981.7	3.93E-05
EBT00051365099	Met3(CAU)	C	72	Acc-stem	CAU	9.30E-04	13178.7	0.00370436	0.00166457	16982.3	0.00511629
EBT00051365099	Met3(CAU)	A	73	In between	CAU	4.68E-04	13227.7	0	7.61E-04	17069.7	0
EBT00051365099	Met3(CAU)	C	74	CCA	CAU	0	13154	0	1.76E-05	16946.7	0
EBT00051365099	Met3(CAU)	C	75	CCA	CAU	0	12752	0	0	16344.7	0
EBT00051365099	Met3(CAU)	A	76	CCA	CAU	0	12267.3	0.925895	0	15451	0.900737
EBT00051365187	Lys1(UUU)	G	1	Acc-stem	UUU	0	165540	0.00767094	0	155657	0.00812666
EBT00051365187	Lys1(UUU)	G	2	Acc-stem	UUU	0	166820	0.00628444	0	156932	0.00767436
EBT00051365187	Lys1(UUU)	G	3	Acc-stem	UUU	0	167875	0.00618636	0	158146	0.00433993
EBT00051365187	Lys1(UUU)	T	4	Acc-stem	UUU	8.09E-04	168920	0.0102286	0.00108877	158835	0.0142003
EBT00051365187	Lys1(UUU)	C	5	Acc-stem	UUU	4.50E-04	170666	0.00187734	4.82E-04	161123	0.00252789
EBT00051365187	Lys1(UUU)	G	6	Acc-stem	UUU	9.95E-04	170987	0.0256818	8.27E-04	161531	0.0276148
EBT00051365187	Lys1(UUU)	T	7	Acc-stem	UUU	2.09E-04	175494	0.0106604	2.26E-04	166119	0.0145614
EBT00051365187	Lys1(UUU)	T	8	In between	UUU	0.0191581	177385	0.00874548	0.0145772	168573	0.00905667
EBT00051365187	Lys1(UUU)	A	9	In between	UUU	5.49E-04	178950	0.0159599	7.06E-04	170114	0.0187486
EBT00051365187	Lys1(UUU)	G	10	D-stem	UUU	0.00292192	181852	0.00974723	0.00222622	173364	0.00954287
EBT00051365187	Lys1(UUU)	C	11	D-stem	UUU	6.03E-04	183642	0.0388725	0.00108937	175035	0.045005
EBT00051365187	Lys1(UUU)	T	12	D-stem	UUU	2.67E-04	191069	0	2.80E-04	183283	0
EBT00051365187	Lys1(UUU)	C	13	D-stem	UUU	7.53E-04	189856	0.00442057	0.00112798	182211	0.00321665
EBT00051365187	Lys1(UUU)	A	14	D-loop	UUU	3.10E-04	190699	0.0118506	2.95E-04	182799	0.0152578
EBT00051365187	Lys1(UUU)	G	15	D-loop	UUU	0.00189181	192986	0.0343296	0.00128174	185631	0.0385516
EBT00051365187	Lys1(UUU)	T	16	D-loop	UUU	4.51E-04	199847	1.68E-04	5.12E-04	193075	8.47E-04
EBT00051365187	Lys1(UUU)	C	17	D-loop	UUU	8.68E-04	199881	0.00179451	0.0010167	193238	0.00131099
EBT00051365187	Lys1(UUU)	G	18	D-loop	UUU	0.00247206	200240	0.0104014	0.0019667	193492	0.0125642
EBT00051365187	Lys1(UUU)	G	19	D-loop	UUU	0.00261338	202345	0.0256933	0.00198114	195954	0.0318893
EBT00051365187	Lys1(UUU)	T	20	D-loop	UUU	5.97E-04	207681	0.0059321	7.15E-04	202409	0.00906685
EBT00051365187	Lys1(UUU)	A	21	D-loop	UUU	1.67E-04	208920	0	1.63E-04	204261	0
EBT00051365187	Lys1(UUU)	G	22	D-stem	UUU	0.00123403	208869	0.00191777	0.00118001	204217	0.00372879
EBT00051365187	Lys1(UUU)	A	23	D-stem	UUU	2.24E-04	209271	0.00715756	2.16E-04	204982	0.00805563
EBT00051365187	Lys1(UUU)	G	24	D-stem	UUU	0.00131749	210779	0.00551393	6.24E-04	206646	0.0048063
EBT00051365187	Lys1(UUU)	C	25	D-stem	UUU	4.99E-04	211948	0.0118606	9.36E-04	207644	0.013252
EBT00051365187	Lys1(UUU)	A	26	In between	UUU	2.86E-04	214492	0	2.67E-04	210433	1.98E-04
EBT00051365187	Lys1(UUU)	G	27	Ac-stem	UUU	0.00170408	214486	0.0159854	0.0010175	210475	0.015509
EBT00051365187	Lys1(UUU)	T	28	Ac-stem	UUU	2.60E-04	217970	5.41E-04	3.09E-04	213790	8.43E-04
EBT00051365187	Lys1(UUU)	T	29	Ac-stem	UUU	4.33E-04	218088	0.0028713	4.37E-04	213971	0.0028474
EBT00051365187	Lys1(UUU)	G	30	Ac-stem	UUU	4.36E-04	218716	0.00127552	4.17E-04	214582	0.0019086
EBT00051365187	Lys1(UUU)	G	31	Ac-stem	UUU	0.00133972	218996	0.00402642	9.28E-04	214992	0.00428713
EBT00051365187	Lys1(UUU)	C	32	Ac-loop	UUU	6.23E-04	219881	0.0313029	6.65E-04	215918	0.0323148
EBT00051365187	Lys1(UUU)	T	33	Ac-loop	UUU	2.71E-04	226986	0.0081335	3.01E-04	223128	0.00818335
EBT00051365187	Lys1(UUU)	T	34	Ac-loop	UUU	0.00160595	228848	0.0224279	0.00131046	224969	0.0239957
EBT00051365187	Lys1(UUU)	T	35	Ac-loop	UUU	1.99E-04	234098	0.0119126	1.75E-04	230500	0.0137054
EBT00051365187	Lys1(UUU)	T	36	Ac-loop	UUU	2.78E-04	236920	6.16E-04	2.66E-04	233703	6.50E-04
EBT00051365187	Lys1(UUU)	A	37	Ac-loop	UUU	0.00269625	237066	0.0155584	0.00270022	233855	0.0133797
EBT00051365187	Lys1(UUU)	A	38	Ac-loop	UUU	3.49E-04	240813	0.0233206	3.70E-04	237026	0.0281876
EBT00051365187	Lys1(UUU)	C	39	Ac-stem	UUU	4.29E-04	246563	0.0103965	4.89E-04	243901	0.0109676
EBT00051365187	Lys1(UUU)	C	40	Ac-stem	UUU	3.79E-04	249153	0.01158	4.12E-04	246606	0.016746
EBT00051365187	Lys1(UUU)	A	41	Ac-stem	UUU	6.41E-04	252072	0.00487419	7.18E-04	250806	0.00473415
EBT00051365187	Lys1(UUU)	A	42	Ac-stem	UUU	1.79E-04	253307	0.00482709	2.36E-04	251999	0.00640973
EBT00051365187	Lys1(UUU)	T	43	Ac-stem	UUU	1.66E-04	254536	0	2.08E-04	253625	0
EBT00051365187	Lys1(UUU)	T	44	V-region	UUU	4.57E-04	251231	0.0121979	5.02E-04	250360	0.0121099
EBT00051365187	Lys1(UUU)	G	45	V-region	UUU	8.07E-04	254333	0.00374217	5.71E-04	253429	0.00215375
EBT00051365187	Lys1(UUU)	G	46	V-region	UUU	0.00291247	255288	0.0304917	0.00275355	253976	0.0115794
EBT00051365187	Lys1(UUU)	T	47	V-region	UUU	0.00448747	263317	0.0179942	1.86E-04	256951	0
EBT00051365187	Lys1(UUU)	C	48	V-region	UUU	8.42E-04	268142	0.00491095	0.00177615	255451	0.00485397
EBT00051365187	Lys1(UUU)	G	49	T-stem	UUU	0.00177222	269466	0.00708578	0.00129417	256697	0.00867628
EBT00051365187	Lys1(UUU)	T	50	T-stem	UUU	1.88E-04	271389	0.00298676	1.80E-04	258944	0.00288802
EBT00051365187	Lys1(UUU)	A	51	T-stem	UUU	1.86E-04	272202	0	1.31E-04	259694	0
EBT00051365187	Lys1(UUU)	G	52	T-stem	UUU	0.00190755	271432	0.00160372	0.00118788	258949	0.00136648
EBT00051365187	Lys1(UUU)	G	53	T-stem	UUU	0.00158182	271868	0.00848305	0.00110706	259303	0.00967904
EBT00051365187	Lys1(UUU)	T	54	T-loop	UUU	2.31E-04	274194	0	2.15E-04	261837	0
EBT00051365187	Lys1(UUU)	T	55	T-loop	UUU	2.15E-04	273876	0	2.26E-04	261596	0
EBT00051365187	Lys1(UUU)	C	56	T-loop	UUU	5.46E-04	272555	0.00325599	0.00115332	259979	0.00411029
EBT00051365187	Lys1(UUU)	G	57	T-loop	UUU	0.00167575	273445	0	0.0010842	261052	0
EBT00051365187	Lys1(UUU)	A	58	T-loop	UUU	1.75E-04	272816	0.00324438	1.93E-04	260270	0.00329846
EBT00051365187	Lys1(UUU)	A	59	T-loop	UUU	8.15E-05	273704	0	1.50E-04	261132	1.40E-05
EBT00051365187	Lys1(UUU)	T	60	T-loop	UUU	1.95E-04	273486	0	2.38E-04	261135	0
EBT00051365187	Lys1(UUU)	C	61	T-stem	UUU	5.94E-04	272770	0	0.00113806	260455	0
EBT00051365187	Lys1(UUU)	C	62	T-stem	UUU	4.09E-04	271548	0.00197976	5.26E-04	259313	0.00215874
EBT00051365187	Lys1(UUU)	T	63	T-stem	UUU	2.11E-04	272086	0.0105004	2.52E-04	259874	0.0104775
EBT00051365187	Lys1(UUU)	A	64	T-stem	UUU	2.61E-04	274974	0	2.45E-04	262626	0
EBT00051365187	Lys1(UUU)	C	65	T-stem	UUU	0.00121323	272263	0.00979309	0.00253152	259950	0.00975579
EBT00051365187	Lys1(UUU)	A	66	Acc-stem	UUU	1.54E-04	274956	0	1.77E-04	262511	0
EBT00051365187	Lys1(UUU)	C	67	Acc-stem	UUU	5.89E-04	273178	0	0.00102408	260733	0
EBT00051365187	Lys1(UUU)	G	68	Acc-stem	UUU	5.84E-04	271429	0.013392	4.85E-04	259302	0.0131603
EBT00051365187	Lys1(UUU)	A	69	Acc-stem	UUU	2.26E-04	275114	0	1.63E-04	262760	0
EBT00051365187	Lys1(UUU)	C	70	Acc-stem	UUU	5.18E-04	272352	0.00117723	7.15E-04	259967	6.96E-04
EBT00051365187	Lys1(UUU)	C	71	Acc-stem	UUU	6.76E-04	272673	0	0.00103209	260148	0
EBT00051365187	Lys1(UUU)	C	72	Acc-stem	UUU	6.81E-04	272584	5.16E-04	9.65E-04	260094	0.00108561
EBT00051365187	Lys1(UUU)	A	73	In between	UUU	5.87E-04	272725	4.64E-05	5.43E-04	260376	2.11E-04
EBT00051365187	Lys1(UUU)	C	74	CCA	UUU	1.66E-05	272737	0	3.14E-05	260431	0
EBT00051365187	Lys1(UUU)	C	75	CCA	UUU	0	260566	0	0	248201	0
EBT00051365187	Lys1(UUU)	A	76	CCA	UUU	0	241130	0	0	228650	0
EBT00051365344	Arg1(CCG)	G	1	Acc-stem	CCG	0	7415.33	0.0107173	0	12274.3	0.0087221
EBT00051365344	Arg1(CCG)	C	2	Acc-stem	CCG	0	7495.67	0.0108213	0	12382.3	0.0105215
EBT00051365344	Arg1(CCG)	A	3	Acc-stem	CCG	0	7577.67	0.0101885	0	12514	0.0127541
EBT00051365344	Arg1(CCG)	T	4	Acc-stem	CCG	1.78E-04	7655.67	0.00524082	2.82E-04	12675.7	0.00585606
EBT00051365344	Arg1(CCG)	C	5	Acc-stem	CCG	6.62E-04	7696	0.00474179	0.00100505	12750.3	0.00276351
EBT00051365344	Arg1(CCG)	C	6	Acc-stem	CCG	7.26E-04	7732.67	7.75E-04	0.00155448	12785.7	0.00495486
EBT00051365344	Arg1(CCG)	G	7	Acc-stem	CCG	0.00749342	7738.67	0.042876	0.00504741	12849.3	0.0381036
EBT00051365344	Arg1(CCG)	T	8	In between	CCG	0.0216989	8085.33	0.00606458	0.0181385	13358.3	0.00511407
EBT00051365344	Arg1(CCG)	A	9	In between	CCG	3.58E-04	8134.67	0.0105417	1.55E-04	13427	0.0108295
EBT00051365344	Arg1(CCG)	G	10	D-stem	CCG	0.00439201	8221.33	0.0139527	0.00278912	13574	0.0147347
EBT00051365344	Arg1(CCG)	C	11	D-stem	CCG	6.51E-04	8337.67	0.0266179	0.00101959	13777	0.035179
EBT00051365344	Arg1(CCG)	T	12	D-stem	CCG	1.51E-04	8565.67	0	2.32E-04	14279.3	0
EBT00051365344	Arg1(CCG)	C	13	D-stem	CCG	6.65E-04	8531.33	0.0072534	7.89E-04	14248	0.0149563
EBT00051365344	Arg1(CCG)	A	14	D-loop	CCG	4.76E-04	8593.67	0.00317055	3.25E-04	14464.3	0.00323885
EBT00051365344	Arg1(CCG)	G	15	D-loop	CCG	0.00318445	8621	0.0122217	0.00145346	14511.3	0.00790775
EBT00051365344	Arg1(CCG)	C	16	D-loop	CCG	0.00126515	8727.67	0.009083	0.0016795	14627	0.0102179
EBT00051365344	Arg1(CCG)	T	17	D-loop	CCG	6.96E-04	8807.67	0.00478343	7.67E-04	14778	0.00560739
EBT00051365344	Arg1(CCG)	G	18	D-loop	CCG	0.00205434	8850	0.00684547	8.09E-04	14861.3	0.00699363
EBT00051365344	Arg1(CCG)	G	19	D-loop	CCG	0.00179957	8911	0.00457998	0.00100137	14966	0.00443479
EBT00051365344	Arg1(CCG)	A	20	D-loop	CCG	5.20E-04	8952	0.0290672	4.51E-04	15032.7	0.0293782
EBT00051365344	Arg1(CCG)	T	20a	D-loop	CCG	5.13E-04	9220	0	8.66E-04	15487.7	0
EBT00051365344	Arg1(CCG)	A	21	D-loop	CCG	7.93E-05	8626	0.0741324	1.48E-04	14516.3	0.0756479
EBT00051365344	Arg1(CCG)	G	22	D-stem	CCG	0.00140995	9316.67	0	8.15E-04	15704.3	0
EBT00051365344	Arg1(CCG)	A	23	D-stem	CCG	2.63E-04	9057	0.0369333	2.05E-04	15375.3	0.0287832
EBT00051365344	Arg1(CCG)	G	24	D-stem	CCG	0.00280058	9404.33	0.0150124	0.0011414	15831	0.0176233
EBT00051365344	Arg1(CCG)	T	25	D-stem	CCG	2.43E-04	9547.67	0.0105361	2.50E-04	16115	0.0111272
EBT00051365344	Arg1(CCG)	A	26	In between	CCG	4.24E-04	9649.33	0	3.15E-04	16296.3	0
EBT00051365344	Arg1(CCG)	C	27	Ac-stem	CCG	6.56E-04	9628	0.00372517	6.79E-04	16263.7	0.00528033
EBT00051365344	Arg1(CCG)	T	28	Ac-stem	CCG	3.11E-04	9664	9.99E-04	2.76E-04	16350	0.00103867
EBT00051365344	Arg1(CCG)	G	29	Ac-stem	CCG	9.69E-04	9673.67	0	6.60E-04	16367	0
EBT00051365344	Arg1(CCG)	C	30	Ac-stem	CCG	7.89E-04	9639.33	0.00495492	0.00129734	16321.7	0.00475619
EBT00051365344	Arg1(CCG)	C	31	Ac-stem	CCG	7.21E-04	9687.33	7.91E-04	9.57E-04	16399.7	8.13E-05
EBT00051365344	Arg1(CCG)	C	32	Ac-loop	CCG	0.00449381	9695	0.0189564	0.00395817	16401	0.0185702
EBT00051365344	Arg1(CCG)	T	33	Ac-loop	CCG	6.45E-05	9882.33	0.0060348	2.97E-04	16711.3	0.00588923
EBT00051365344	Arg1(CCG)	C	34	Ac-loop	CCG	8.68E-04	9942.33	0.00224125	0.00101087	16810.3	0.0069119
EBT00051365344	Arg1(CCG)	C	35	Ac-loop	CCG	4.62E-04	9964.67	0.00260243	3.55E-04	16927.3	0.00167102
EBT00051365344	Arg1(CCG)	G	36	Ac-loop	CCG	0.00135996	9990.67	0.0163762	6.11E-04	16955.7	0.0167588
EBT00051365344	Arg1(CCG)	A	37	Ac-loop	CCG	7.21E-04	10157	0.0163982	6.46E-04	17244.7	0.0192049
EBT00051365344	Arg1(CCG)	A	38	Ac-loop	CCG	1.91E-04	10326.3	0.00453085	1.83E-04	17582.3	0.00573033
EBT00051365344	Arg1(CCG)	G	39	Ac-stem	CCG	7.45E-04	10373.3	0.00345844	8.27E-04	17683.7	0.00379321
EBT00051365344	Arg1(CCG)	G	40	Ac-stem	CCG	6.05E-04	10409.3	0.00446315	3.03E-04	17751	0.00591749
EBT00051365344	Arg1(CCG)	C	41	Ac-stem	CCG	0.00100822	10456	0.00136895	8.78E-04	17856.7	0.00334884
EBT00051365344	Arg1(CCG)	A	42	Ac-stem	CCG	3.19E-04	10470.3	0	3.21E-04	17916.7	0.00405788
EBT00051365344	Arg1(CCG)	G	43	Ac-stem	CCG	0.00244451	9929.67	0.0512755	0.00151897	17989.7	0.00220012
EBT00051365344	Arg1(CCG)	G	44	V-region	CCG	0.00166438	10466.3	0.0119265	0.00115175	18029.3	0.00399595
EBT00051365344	Arg1(CCG)	G	45	V-region	CCG	0.00103615	10592.7	0.0191067	8.84E-04	18101.7	0.00385215
EBT00051365344	Arg1(CCG)	G	46	V-region	CCG	0.00344874	10799	0.165499	0.00354849	18171.7	0.0114603
EBT00051365344	Arg1(CCG)	T	47	V-region	CCG	0.0672066	12940.7	0.153855	3.36E-04	18382.3	0.00265852
EBT00051365344	Arg1(CCG)	C	48	V-region	CCG	6.11E-04	15293.7	0.00289042	9.18E-04	18431.3	0
EBT00051365344	Arg1(CCG)	G	49	T-stem	CCG	8.52E-04	15338	0.00266597	8.11E-04	18431	0.0023636
EBT00051365344	Arg1(CCG)	T	50	T-stem	CCG	2.02E-04	15379	0.00330525	3.40E-04	18474.7	0.00382839
EBT00051365344	Arg1(CCG)	G	51	T-stem	CCG	0.00179517	15430	0.00284348	0.001092	18545.7	4.67E-04
EBT00051365344	Arg1(CCG)	G	52	T-stem	CCG	0.00180736	15474	0.00217097	0.00111911	18554.3	9.15E-04
EBT00051365344	Arg1(CCG)	G	53	T-stem	CCG	0.00102395	15507.7	0.00496204	9.55E-04	18571.3	0.00311337
EBT00051365344	Arg1(CCG)	T	54	T-loop	CCG	2.16E-04	15585	0.00298539	2.61E-04	18629.3	0.00260556
EBT00051365344	Arg1(CCG)	T	55	T-loop	CCG	2.11E-04	15631.7	0	2.57E-04	18678	0
EBT00051365344	Arg1(CCG)	C	56	T-loop	CCG	3.90E-04	15595.3	8.33E-04	7.45E-04	18651.7	0
EBT00051365344	Arg1(CCG)	G	57	T-loop	CCG	0.00114897	15608.3	0.00537406	9.88E-04	18624.7	0.00742557
EBT00051365344	Arg1(CCG)	A	58	T-loop	CCG	3.81E-04	15692.7	0	4.00E-04	18764	0
EBT00051365344	Arg1(CCG)	A	59	T-loop	CCG	6.10E-05	15640.7	0	2.10E-04	18692	0
EBT00051365344	Arg1(CCG)	T	60	T-loop	CCG	1.29E-04	15621.7	0	5.23E-04	18655	0
EBT00051365344	Arg1(CCG)	C	61	T-stem	CCG	3.01E-04	15539.3	0	4.94E-04	18550	0
EBT00051365344	Arg1(CCG)	C	62	T-stem	CCG	2.33E-04	15478.3	0	5.60E-04	18519	0
EBT00051365344	Arg1(CCG)	C	63	T-stem	CCG	6.78E-04	15332.7	0.0137227	9.77E-04	18302	0.0134579
EBT00051365344	Arg1(CCG)	G	64	T-stem	CCG	0.00194362	15546	0.00292891	0.00229715	18551.7	0.00322378
EBT00051365344	Arg1(CCG)	C	65	T-stem	CCG	5.48E-04	15591.7	0.00132374	0.00124956	18611.7	0.00194838
EBT00051365344	Arg1(CCG)	C	66	Acc-stem	CCG	4.98E-04	15612.3	0	0.00187863	18648	0
EBT00051365344	Arg1(CCG)	G	67	Acc-stem	CCG	7.82E-04	15549.3	0	0.00106985	18572.3	0
EBT00051365344	Arg1(CCG)	G	68	Acc-stem	CCG	7.58E-04	15522	0.00555247	8.21E-04	18495.3	0.00882458
EBT00051365344	Arg1(CCG)	A	69	Acc-stem	CCG	2.35E-04	15608.7	0	1.40E-04	18660	0
EBT00051365344	Arg1(CCG)	T	70	Acc-stem	CCG	6.34E-05	15528.7	0	2.41E-04	18483	8.29E-04
EBT00051365344	Arg1(CCG)	G	71	Acc-stem	CCG	6.03E-04	15514.7	0.0037458	5.21E-04	18498.3	0.00502017
EBT00051365344	Arg1(CCG)	C	72	Acc-stem	CCG	0.00123715	15573	0	0.00282901	18591.7	0
EBT00051365344	Arg1(CCG)	G	73	In between	CCG	0.00378551	15567.3	0.00283976	0.00164563	18571.3	0.00489391
EBT00051365344	Arg1(CCG)	C	74	CCA	CCG	0	15611.7	0	3.25E-05	18662.7	0
EBT00051365344	Arg1(CCG)	C	75	CCA	CCG	0	15164	0	0	17923.7	0
EBT00051365344	Arg1(CCG)	A	76	CCA	CCG	0	14094.7	0.732765	0	16219.3	0.71487
EBT00051365422	Cys1(GCA)	G	1	Acc-stem	GCA	0	52742.7	0.0154746	0	56884	0.0135152
EBT00051365422	Cys1(GCA)	G	2	Acc-stem	GCA	0	53571.7	0.00316328	0	57663.3	0.00432826
EBT00051365422	Cys1(GCA)	C	3	Acc-stem	GCA	0	53741.7	0.00362767	0	57914	5.46E-04
EBT00051365422	Cys1(GCA)	T	4	Acc-stem	GCA	7.50E-04	53937.3	0.0058062	7.82E-04	57945.7	0.00787029
EBT00051365422	Cys1(GCA)	G	5	Acc-stem	GCA	2.40E-04	54252.3	0.00927076	2.39E-04	58405.3	0.00895928
EBT00051365422	Cys1(GCA)	A	6	Acc-stem	GCA	2.14E-04	54760	0.00255615	1.13E-04	58933.3	0.0022686
EBT00051365422	Cys1(GCA)	G	7	Acc-stem	GCA	0.00252089	54900.3	0.0301779	0.00211457	59067.3	0.0318788
EBT00051365422	Cys1(GCA)	T	8	In between	GCA	0.0981275	56608.7	0.0166302	0.0735844	61012.3	0.0146322
EBT00051365422	Cys1(GCA)	A	9	In between	GCA	1.99E-04	57566	4.05E-04	2.75E-04	61918.3	5.86E-04
EBT00051365422	Cys1(GCA)	G	10	D-stem	GCA	0.00575927	57589.3	0.0243396	0.00541733	61954.7	0.025916
EBT00051365422	Cys1(GCA)	C	11	D-stem	GCA	5.77E-04	59026	0	0.00106189	63603	0
EBT00051365422	Cys1(GCA)	A	12	D-stem	GCA	2.77E-04	58186	0.0262844	2.58E-04	62965	0.0260132
EBT00051365422	Cys1(GCA)	G	13	D-stem	GCA	0.00161498	59756.7	0.00217077	9.62E-04	64646.7	6.03E-04
EBT00051365422	Cys1(GCA)	A	14	D-loop	GCA	2.25E-04	59886.7	0.0119342	2.06E-04	64685.7	0.0121862
EBT00051365422	Cys1(GCA)	G	15	D-loop	GCA	0.00159075	60610	0.00913322	0.00116645	65483.7	0.0084392
EBT00051365422	Cys1(GCA)	T	16	D-loop	GCA	2.21E-04	61168.7	2.51E-04	1.73E-04	66041	0
EBT00051365422	Cys1(GCA)	G	18	D-loop	GCA	9.29E-04	61184	0.00849696	4.82E-04	66032.3	0.00708733
EBT00051365422	Cys1(GCA)	G	19	D-loop	GCA	0.00103464	61708.3	0.028409	6.56E-04	66503.7	0.0245773
EBT00051365422	Cys1(GCA)	T	20	D-loop	GCA	4.57E-04	63512.7	0.0124495	5.25E-04	68179.3	0.0131714
EBT00051365422	Cys1(GCA)	T	21	D-loop	GCA	2.54E-04	64313.3	0.00399044	3.13E-04	69089.3	0.00581828
EBT00051365422	Cys1(GCA)	A	22	D-stem	GCA	2.00E-04	64571	0.00489045	2.81E-04	69493.7	0.00426034
EBT00051365422	Cys1(GCA)	T	23	D-stem	GCA	2.49E-04	64888.3	0	2.23E-04	69791	0
EBT00051365422	Cys1(GCA)	G	24	D-stem	GCA	0.00642721	64829.3	0.0114416	0.00402726	69715.7	0.00826497
EBT00051365422	Cys1(GCA)	C	25	D-stem	GCA	7.34E-04	65579.7	0.0148667	0.00135218	70296.7	0.0154988
EBT00051365422	Cys1(GCA)	A	26	In between	GCA	1.44E-04	66569.3	9.51E-05	2.19E-04	71403.3	3.27E-04
EBT00051365422	Cys1(GCA)	C	27	Ac-stem	GCA	7.17E-04	66575.7	0	0.00192363	71426.7	0
EBT00051365422	Cys1(GCA)	C	28	Ac-stem	GCA	0.00155664	66557.7	0.00228352	0.0037946	71339	0.00140445
EBT00051365422	Cys1(GCA)	G	29	Ac-stem	GCA	0.00121236	66710	0.0022236	9.37E-04	71439.3	0.00228575
EBT00051365422	Cys1(GCA)	G	30	Ac-stem	GCA	5.93E-04	66858.7	0.0149543	4.74E-04	71603	0.0116272
EBT00051365422	Cys1(GCA)	A	31	Ac-stem	GCA	1.89E-04	67873.7	0.00360642	2.88E-04	72445.3	0.00228156
EBT00051365422	Cys1(GCA)	T	32	Ac-loop	GCA	1.99E-04	68119.3	0	2.57E-04	72611	0
EBT00051365422	Cys1(GCA)	T	33	Ac-loop	GCA	2.11E-04	67634	0.00841544	3.21E-04	72105	0.00798419
EBT00051365422	Cys1(GCA)	G	34	Ac-loop	GCA	0.00201909	68208	0.00463089	0.00154002	72685.3	0.0028626
EBT00051365422	Cys1(GCA)	C	35	Ac-loop	GCA	7.95E-04	68525.3	0.0132668	0.00112812	72894	0.0119328
EBT00051365422	Cys1(GCA)	A	36	Ac-loop	GCA	3.89E-04	69446.7	0.00735644	4.99E-04	73774.3	0.00625906
EBT00051365422	Cys1(GCA)	A	37	Ac-loop	GCA	0.00191164	69961.3	0.0374987	0.00201631	74239	0.0276872
EBT00051365422	Cys1(GCA)	A	38	Ac-loop	GCA	1.32E-04	72687	0.0661599	1.16E-04	76353	0.0666273
EBT00051365422	Cys1(GCA)	T	39	Ac-stem	GCA	1.72E-04	77836.7	0	3.28E-04	81803.3	0
EBT00051365422	Cys1(GCA)	C	40	Ac-stem	GCA	5.54E-04	77335.7	0.0012226	6.98E-04	81284.7	0.00131054
EBT00051365422	Cys1(GCA)	C	41	Ac-stem	GCA	5.02E-04	77430.3	0.00745188	0.00129593	81391.3	0.00699488
EBT00051365422	Cys1(GCA)	G	42	Ac-stem	GCA	6.36E-04	78011.7	3.84E-04	6.85E-04	81964.7	0
EBT00051365422	Cys1(GCA)	T	43	Ac-stem	GCA	2.03E-04	78041.7	0.00483291	3.06E-04	81866.3	0.00598194
EBT00051365422	Cys1(GCA)	G	44	V-region	GCA	0.00164713	78420.7	0.0066082	0.00114814	82359	0.00643005
EBT00051365422	Cys1(GCA)	A	45	V-region	GCA	1.80E-04	78942.3	0	1.62E-04	82892	0
EBT00051365422	Cys1(GCA)	A	46	V-region	GCA	1.77E-04	71682.3	0.0938484	1.66E-04	76098.3	0.0836053
EBT00051365422	Cys1(GCA)	C	48	V-region	GCA	5.86E-04	79106.3	0.0043381	8.79E-04	83041	0.00440006
EBT00051365422	Cys1(GCA)	G	49	T-stem	GCA	0.00705855	79451	0.00730094	0.00299577	83408	0.00466197
EBT00051365422	Cys1(GCA)	C	50	T-stem	GCA	8.05E-04	80035.3	0.00339113	0.00194101	83798.7	0.00345269
EBT00051365422	Cys1(GCA)	C	51	T-stem	GCA	8.06E-04	80307.7	0	0.0017841	84089	0
EBT00051365422	Cys1(GCA)	G	52	T-stem	GCA	0.00254446	80178	0.00313729	0.00148977	84001.7	0.00168759
EBT00051365422	Cys1(GCA)	G	53	T-stem	GCA	0.0033991	80430.3	0.00934038	0.0017491	84143.7	0.00819202
EBT00051365422	Cys1(GCA)	T	54	T-loop	GCA	3.09E-04	81188.7	0.00149223	2.59E-04	84838.7	0.0013576
EBT00051365422	Cys1(GCA)	T	55	T-loop	GCA	2.80E-04	81310	0	3.25E-04	84954	0
EBT00051365422	Cys1(GCA)	C	56	T-loop	GCA	6.15E-04	80757.3	0.00406969	0.00102996	84431	0.00356806
EBT00051365422	Cys1(GCA)	G	57	T-loop	GCA	0.00324614	81087.3	0.00405727	0.00171703	84733.3	0.00385214
EBT00051365422	Cys1(GCA)	A	58	T-loop	GCA	1.54E-04	81417.7	0	1.28E-04	85061	0
EBT00051365422	Cys1(GCA)	T	59	T-loop	GCA	2.17E-04	81084.3	0	2.04E-04	84758.7	0
EBT00051365422	Cys1(GCA)	T	60	T-loop	GCA	3.34E-04	81016.7	0	4.57E-04	84617.3	0
EBT00051365422	Cys1(GCA)	C	61	T-stem	GCA	4.34E-04	80575.3	0.00396804	6.05E-04	84225	0.00304994
EBT00051365422	Cys1(GCA)	C	62	T-stem	GCA	3.53E-04	80896.3	0	5.25E-04	84482.7	0
EBT00051365422	Cys1(GCA)	G	63	T-stem	GCA	0.00703027	80827.7	0.00384113	0.0061529	84475	0.00418484
EBT00051365422	Cys1(GCA)	A	64	T-stem	GCA	1.71E-04	81139.3	0	1.41E-04	84830	0
EBT00051365422	Cys1(GCA)	C	65	T-stem	GCA	5.50E-04	80972.3	0	6.97E-04	84590.7	0
EBT00051365422	Cys1(GCA)	C	66	Acc-stem	GCA	6.01E-04	80831.7	0.00127263	8.67E-04	84495	0.00168955
EBT00051365422	Cys1(GCA)	T	67	Acc-stem	GCA	8.33E-05	80934.7	0.00101214	1.99E-04	84638	6.49E-04
EBT00051365422	Cys1(GCA)	C	68	Acc-stem	GCA	4.51E-04	81016.7	0.00292088	6.56E-04	84693	0.00277096
EBT00051365422	Cys1(GCA)	A	69	Acc-stem	GCA	2.34E-04	81254	0	1.88E-04	84928.3	0
EBT00051365422	Cys1(GCA)	G	70	Acc-stem	GCA	4.59E-04	80615.7	0.00330929	3.26E-04	84280	0.00291821
EBT00051365422	Cys1(GCA)	C	71	Acc-stem	GCA	4.42E-04	80883.3	0.00240098	7.77E-04	84526.7	0.00218781
EBT00051365422	Cys1(GCA)	C	72	Acc-stem	GCA	6.76E-04	81078	0	6.82E-04	84712	0
EBT00051365422	Cys1(GCA)	T	73	In between	GCA	4.68E-04	77517.3	0.045353	4.09E-04	81391.3	0.040845
EBT00051365422	Cys1(GCA)	C	74	CCA	GCA	3.17E-05	81200	0	3.12E-05	84857.3	0
EBT00051365422	Cys1(GCA)	C	75	CCA	GCA	0	79929.7	0	0	83462.7	0
EBT00051365422	Cys1(GCA)	A	76	CCA	GCA	0	75224.7	0	0	77446	0.347728
EBT00051365503	Val1(GAC)	A	1	Acc-stem	GAC	0	64972	0.0272245	0	118733	0.0301177
EBT00051365503	Val1(GAC)	G	2	Acc-stem	GAC	0	66790.3	0	0	122420	0
EBT00051365503	Val1(GAC)	G	3	Acc-stem	GAC	0	66780.7	0.00257394	0	122323	0.00364367
EBT00051365503	Val1(GAC)	C	4	Acc-stem	GAC	6.82E-04	66953	0	8.66E-04	122770	0
EBT00051365503	Val1(GAC)	A	5	Acc-stem	GAC	0.00313566	66867.3	0.0162663	0.00328546	122535	0.0207776
EBT00051365503	Val1(GAC)	C	6	Acc-stem	GAC	4.17E-04	67973	9.75E-04	6.87E-04	125135	0.00114412
EBT00051365503	Val1(GAC)	G	7	Acc-stem	GAC	0.00261236	68039.3	0.0133937	0.00146501	125278	0.0159198
EBT00051365503	Val1(GAC)	T	8	In between	GAC	0.00519325	68963	0.00330963	0.00562755	127305	0.00331433
EBT00051365503	Val1(GAC)	A	9	In between	GAC	3.31E-04	69192	0	3.20E-04	127728	3.34E-04
EBT00051365503	Val1(GAC)	G	10	D-stem	GAC	0.00794318	69136	0.00837636	0.00571302	127771	0.0108613
EBT00051365503	Val1(GAC)	C	11	D-stem	GAC	5.18E-04	69720	0.0223975	7.02E-04	129174	0.0257146
EBT00051365503	Val1(GAC)	T	12	D-stem	GAC	1.96E-04	71317.3	0	2.29E-04	132583	0
EBT00051365503	Val1(GAC)	C	13	D-stem	GAC	6.31E-04	71076	0.00743858	0.00111645	132178	0.00873935
EBT00051365503	Val1(GAC)	A	14	D-loop	GAC	1.74E-04	71608.7	0	2.05E-04	133343	0.00136304
EBT00051365503	Val1(GAC)	G	15	D-loop	GAC	0.00134169	71600.7	0.0284541	6.11E-04	133525	0.0261468
EBT00051365503	Val1(GAC)	T	16	D-loop	GAC	2.17E-04	73697.7	5.47E-04	2.05E-04	137110	0.00148322
EBT00051365503	Val1(GAC)	T	17	D-loop	GAC	3.90E-04	73738	0.0010657	4.25E-04	137314	0.00126072
EBT00051365503	Val1(GAC)	G	18	D-loop	GAC	5.26E-04	73816.7	0.00987222	4.08E-04	137487	0.00895507
EBT00051365503	Val1(GAC)	G	19	D-loop	GAC	6.24E-04	74552.7	0.0246011	3.33E-04	138730	0.0242468
EBT00051365503	Val1(GAC)	T	20	D-loop	GAC	3.44E-04	76433	0.00852251	2.69E-04	142177	0.011969
EBT00051365503	Val1(GAC)	T	20a	D-loop	GAC	2.70E-04	77090	0	2.53E-04	143899	0
EBT00051365503	Val1(GAC)	A	21	D-loop	GAC	1.41E-04	76755.3	0.0095873	1.62E-04	143210	0.0116473
EBT00051365503	Val1(GAC)	G	22	D-stem	GAC	0.00194114	77498.3	0	0.00151746	144898	0
EBT00051365503	Val1(GAC)	A	23	D-stem	GAC	2.99E-04	75508.7	0.029123	2.40E-04	141279	0.0286542
EBT00051365503	Val1(GAC)	G	24	D-stem	GAC	9.05E-04	77773.7	5.70E-04	5.50E-04	145447	3.83E-04
EBT00051365503	Val1(GAC)	C	25	D-stem	GAC	7.88E-04	77818	0.0101338	0.00170491	145503	0.0111031
EBT00051365503	Val1(GAC)	A	26	In between	GAC	3.66E-04	78614.7	0	2.60E-04	147136	0
EBT00051365503	Val1(GAC)	C	27	Ac-stem	GAC	5.80E-04	78492	0	0.00131059	146985	0
EBT00051365503	Val1(GAC)	C	28	Ac-stem	GAC	5.21E-04	78233	0.0124631	7.22E-04	146491	0.0119606
EBT00051365503	Val1(GAC)	A	29	Ac-stem	GAC	1.96E-04	79220.3	0.00198628	1.93E-04	148264	0.0024513
EBT00051365503	Val1(GAC)	C	30	Ac-stem	GAC	2.16E-04	79378	2.31E-04	5.78E-04	148628	0
EBT00051365503	Val1(GAC)	C	31	Ac-stem	GAC	5.39E-04	79396.3	0.00347253	7.90E-04	148580	0.00275409
EBT00051365503	Val1(GAC)	T	32	Ac-loop	GAC	2.06E-04	79673	0	2.00E-04	148991	0
EBT00051365503	Val1(GAC)	T	33	Ac-loop	GAC	2.25E-04	79435.3	9.27E-04	2.96E-04	148601	0.00131276
EBT00051365503	Val1(GAC)	G	34	Ac-loop	GAC	0.00318765	79509	0.0165944	0.00178526	148796	0.0165564
EBT00051365503	Val1(GAC)	A	35	Ac-loop	GAC	2.10E-04	80850.7	0	2.78E-04	151301	0
EBT00051365503	Val1(GAC)	C	36	Ac-loop	GAC	5.58E-04	80622.7	0.00275012	6.33E-04	151000	8.80E-04
EBT00051365503	Val1(GAC)	A	37	Ac-loop	GAC	2.17E-04	80845	0.0171777	1.57E-04	151133	0.0226658
EBT00051365503	Val1(GAC)	T	38	Ac-loop	GAC	2.16E-04	82258	0.00690571	2.02E-04	154638	0.007505
EBT00051365503	Val1(GAC)	G	39	Ac-stem	GAC	5.55E-04	82830	0.00171944	4.52E-04	155807	0.00245852
EBT00051365503	Val1(GAC)	G	40	Ac-stem	GAC	2.39E-04	82972.7	0.00387377	2.51E-04	156191	0.00364034
EBT00051365503	Val1(GAC)	T	41	Ac-stem	GAC	5.29E-04	83295.3	0	4.01E-04	156762	0
EBT00051365503	Val1(GAC)	G	42	Ac-stem	GAC	0.00114836	73455.3	0.110024	7.20E-04	156482	0.00170973
EBT00051365503	Val1(GAC)	G	43	Ac-stem	GAC	0.00609468	82536.3	0.0129476	0.00418328	156750	0.00462077
EBT00051365503	Val1(GAC)	G	44	V-region	GAC	0.00315841	83619	0.00924573	0.00400502	157477	0.00299672
EBT00051365503	Val1(GAC)	G	45	V-region	GAC	6.49E-04	84399.3	0.0180796	6.06E-04	157951	0.00158448
EBT00051365503	Val1(GAC)	G	46	V-region	GAC	0.00217216	85953.3	0.171364	0.00293291	158201	0.00470173
EBT00051365503	Val1(GAC)	T	47	V-region	GAC	0.136357	103729	0.153235	2.98E-04	158949	0
EBT00051365503	Val1(GAC)	C	48	V-region	GAC	4.33E-04	122500	0.00202582	0.0010928	158870	0
EBT00051365503	Val1(GAC)	G	49	T-stem	GAC	6.48E-04	122749	0.00374698	7.35E-04	158769	0.00339798
EBT00051365503	Val1(GAC)	T	50	T-stem	GAC	1.90E-04	123210	0.00223237	2.42E-04	159310	3.18E-04
EBT00051365503	Val1(GAC)	T	51	T-stem	GAC	4.03E-04	123486	0.00109743	4.92E-04	159361	0
EBT00051365503	Val1(GAC)	G	52	T-stem	GAC	0.00303854	123622	0.00347433	0.00165262	159276	0.0015421
EBT00051365503	Val1(GAC)	G	53	T-stem	GAC	0.00194312	124053	0.00731925	0.00114557	159522	0.00504166
EBT00051365503	Val1(GAC)	T	54	T-loop	GAC	1.61E-04	124967	0	2.86E-04	160331	0
EBT00051365503	Val1(GAC)	T	55	T-loop	GAC	2.04E-04	124966	0	3.15E-04	160221	0
EBT00051365503	Val1(GAC)	C	56	T-loop	GAC	3.94E-04	124603	0.00135447	0.00103567	159668	0.00101983
EBT00051365503	Val1(GAC)	G	57	T-loop	GAC	9.56E-04	124772	0.00430923	9.01E-04	159831	0.00533331
EBT00051365503	Val1(GAC)	A	58	T-loop	GAC	1.76E-04	125312	0	3.66E-04	160688	0
EBT00051365503	Val1(GAC)	A	59	T-loop	GAC	1.22E-04	124990	0	1.57E-04	160243	0
EBT00051365503	Val1(GAC)	T	60	T-loop	GAC	2.19E-04	124816	0	3.68E-04	159714	0
EBT00051365503	Val1(GAC)	C	61	T-stem	GAC	3.46E-04	124161	8.77E-04	7.48E-04	159195	9.89E-04
EBT00051365503	Val1(GAC)	C	62	T-stem	GAC	2.75E-04	124270	0.00835747	5.66E-04	159353	0.00819898
EBT00051365503	Val1(GAC)	A	63	T-stem	GAC	2.60E-04	125317	0.0012884	3.37E-04	160670	0.00171279
EBT00051365503	Val1(GAC)	A	64	T-stem	GAC	1.34E-04	125479	0	1.64E-04	160946	0
EBT00051365503	Val1(GAC)	T	65	T-stem	GAC	1.51E-04	124334	2.76E-04	2.78E-04	159185	4.40E-04
EBT00051365503	Val1(GAC)	C	66	Acc-stem	GAC	5.09E-04	124368	0	0.00145824	159255	0
EBT00051365503	Val1(GAC)	G	67	Acc-stem	GAC	2.68E-04	124117	0	3.33E-04	158780	0
EBT00051365503	Val1(GAC)	T	68	Acc-stem	GAC	2.74E-04	120874	0.0260371	3.67E-04	152296	0.0393399
EBT00051365503	Val1(GAC)	G	69	Acc-stem	GAC	4.78E-04	124105	0.00333547	4.26E-04	158533	0.00553898
EBT00051365503	Val1(GAC)	C	70	Acc-stem	GAC	8.19E-04	124520	0.00160626	0.00176777	159416	0.00166373
EBT00051365503	Val1(GAC)	C	71	Acc-stem	GAC	3.78E-04	124721	0	5.10E-04	159681	0
EBT00051365503	Val1(GAC)	T	72	Acc-stem	GAC	3.30E-04	121991	0.0261444	3.93E-04	154400	0.0397274
EBT00051365503	Val1(GAC)	A	73	In between	GAC	3.06E-04	125266	0	2.59E-04	160787	0
EBT00051365503	Val1(GAC)	C	74	CCA	GAC	1.12E-05	124262	0	2.51E-05	159078	0
EBT00051365503	Val1(GAC)	C	75	CCA	GAC	0	122140	0	0	154369	0
EBT00051365503	Val1(GAC)	A	76	CCA	GAC	0	118455	0	0	146920	0
EBT00051365670	Arg1(UCU)	G	1	Acc-stem	UCU	0	489.333	0	0	3068.67	0.00475676
EBT00051365670	Arg1(UCU)	C	2	Acc-stem	UCU	0	488.667	0.00475221	0	3083.33	0.00931777
EBT00051365670	Arg1(UCU)	G	3	Acc-stem	UCU	0	491	0.0127346	0	3112.33	0.00267037
EBT00051365670	Arg1(UCU)	C	4	Acc-stem	UCU	0.00123686	497.333	0.00863787	6.66E-04	3120.67	0.00615711
EBT00051365670	Arg1(UCU)	C	5	Acc-stem	UCU	6.89E-04	501.667	0.00660066	6.01E-04	3140	0
EBT00051365670	Arg1(UCU)	C	6	Acc-stem	UCU	0	505	0.00655738	3.91E-04	3136	0.00822264
EBT00051365670	Arg1(UCU)	G	7	Acc-stem	UCU	0.00341673	508.333	0.0305149	0.00727499	3162	0.0239737
EBT00051365670	Arg1(UCU)	T	8	In between	UCU	0.0194131	524.333	0.0100692	0.0415045	3239.67	0.00907422
EBT00051365670	Arg1(UCU)	A	9	In between	UCU	0	529.667	0.00188442	1.56E-04	3269.33	0.00859193
EBT00051365670	Arg1(UCU)	G	10	D-stem	UCU	0.00645806	530.667	0	0.00320083	3297.67	0
EBT00051365670	Arg1(UCU)	C	11	D-stem	UCU	0	509.667	0.0744552	9.87E-04	3094.33	0.0935456
EBT00051365670	Arg1(UCU)	T	12	D-stem	UCU	5.55E-04	550.667	0	1.35E-04	3413.67	0
EBT00051365670	Arg1(UCU)	C	13	D-stem	UCU	6.35E-04	542.333	0.00973828	0.00129693	3372	0.00735944
EBT00051365670	Arg1(UCU)	A	14	D-loop	UCU	0	547.667	0.008449	7.39E-04	3397	0.00885042
EBT00051365670	Arg1(UCU)	G	15	D-loop	UCU	0.00418789	552.333	0.0172005	0.00274276	3427.33	0.015417
EBT00051365670	Arg1(UCU)	C	16	D-loop	UCU	5.44E-04	562	0	8.89E-04	3481	0.00133882
EBT00051365670	Arg1(UCU)	T	17	D-loop	UCU	6.25E-04	561.333	0.00707547	9.65E-04	3485.67	0.00646081
EBT00051365670	Arg1(UCU)	G	18	D-loop	UCU	0.00292904	565.333	0.0087668	3.89E-04	3508.33	0.00688809
EBT00051365670	Arg1(UCU)	G	19	D-loop	UCU	0.00123457	570.333	0.0109827	0.00120529	3532.67	0.019067
EBT00051365670	Arg1(UCU)	A	20	D-loop	UCU	0	576.667	0.0187181	9.53E-05	3601.33	0.0196897
EBT00051365670	Arg1(UCU)	T	20a	D-loop	UCU	0.00177412	587.667	0	4.40E-04	3673.67	0
EBT00051365670	Arg1(UCU)	A	21	D-loop	UCU	0	571.333	0.0349099	7.15E-05	3563.33	0.0368502
EBT00051365670	Arg1(UCU)	G	22	D-stem	UCU	0.00206718	592	0	0.00170104	3699.67	0.00233708
EBT00051365670	Arg1(UCU)	A	23	D-stem	UCU	0	591	0.00337268	5.04E-04	3708.33	0.00393947
EBT00051365670	Arg1(UCU)	G	24	D-stem	UCU	0.00330222	593	0.00336134	0.00387301	3723	0.00658187
EBT00051365670	Arg1(UCU)	C	25	D-stem	UCU	5.17E-04	595	0.0192308	5.45E-04	3747.67	0.0136854
EBT00051365670	Arg1(UCU)	A	26	In between	UCU	0	606.667	0.0010977	6.73E-05	3799.67	0
EBT00051365670	Arg1(UCU)	T	27	Ac-stem	UCU	5.64E-04	607.333	0.00164384	0	3792	7.03E-04
EBT00051365670	Arg1(UCU)	C	28	Ac-stem	UCU	5.65E-04	608.333	0.00490731	1.35E-04	3794.67	0
EBT00051365670	Arg1(UCU)	C	29	Ac-stem	UCU	0	611.333	0	3.38E-04	3794	0.00524384
EBT00051365670	Arg1(UCU)	G	30	Ac-stem	UCU	5.70E-04	610.667	0.00650759	5.56E-04	3814	0.00917908
EBT00051365670	Arg1(UCU)	C	31	Ac-stem	UCU	0	614.667	0	2.00E-04	3849.33	0.0021602
EBT00051365670	Arg1(UCU)	C	32	Ac-loop	UCU	0.00698152	613	0.0972018	0.00732985	3857.67	0.181136
EBT00051365670	Arg1(UCU)	T	33	Ac-loop	UCU	0	679	0.0135593	5.47E-05	4711	0.010502
EBT00051365670	Arg1(UCU)	T	34	Ac-loop	UCU	4.80E-04	688.333	0.00768861	0	4761	0.0141496
EBT00051365670	Arg1(UCU)	C	35	Ac-loop	UCU	0.0014161	693.667	0.0271155	6.45E-04	4829.33	0.0142877
EBT00051365670	Arg1(UCU)	T	36	Ac-loop	UCU	0	713	0.00880445	3.02E-04	4899.33	0.00480737
EBT00051365670	Arg1(UCU)	A	37	Ac-loop	UCU	0.0059782	719.333	0.0283656	0.00132884	4923	0.00952317
EBT00051365670	Arg1(UCU)	A	38	Ac-loop	UCU	8.73E-04	740.333	0.0564996	3.55E-04	4970.33	0.0478289
EBT00051365670	Arg1(UCU)	G	39	Ac-stem	UCU	0.00278109	784.667	0.0154747	7.27E-04	5220	0.00565115
EBT00051365670	Arg1(UCU)	C	40	Ac-stem	UCU	0.00133869	797	0	3.11E-04	5249.67	0.00234385
EBT00051365670	Arg1(UCU)	G	41	Ac-stem	UCU	0.00118765	793.333	0	4.94E-04	5262	0
EBT00051365670	Arg1(UCU)	G	42	Ac-stem	UCU	0.00164651	792.333	0.0116424	5.00E-04	5256.67	0.0038532
EBT00051365670	Arg1(UCU)	A	43	Ac-stem	UCU	0	801.667	0.0151515	1.84E-04	5277	0.00365032
EBT00051365670	Arg1(UCU)	T	44	V-region	UCU	0.00195609	814	0.0157195	4.85E-05	5296.33	0.00219794
EBT00051365670	Arg1(UCU)	G	45	V-region	UCU	0	827	0.0783804	6.51E-04	5308	0.00418986
EBT00051365670	Arg1(UCU)	G	46	V-region	UCU	0.0040876	897.333	0.562561	0.00356892	5330.33	0.00812554
EBT00051365670	Arg1(UCU)	T	47	V-region	UCU	0.132021	2051.33	0.388331	3.45E-04	5374	0.00370782
EBT00051365670	Arg1(UCU)	C	48	V-region	UCU	2.02E-04	3353.67	0.0101338	0.00178991	5394	0.00221976
EBT00051365670	Arg1(UCU)	G	49	T-stem	UCU	1.92E-04	3388	0.00800312	0.00118712	5406	0.00405306
EBT00051365670	Arg1(UCU)	C	50	T-stem	UCU	4.75E-04	3415.33	0	0.00128078	5428	0
EBT00051365670	Arg1(UCU)	A	51	T-stem	UCU	0.00179697	3410.33	0.00689187	6.57E-04	5421.67	0.00343116
EBT00051365670	Arg1(UCU)	G	52	T-stem	UCU	0.00162887	3434	0.00280708	5.31E-04	5440.33	0
EBT00051365670	Arg1(UCU)	G	53	T-stem	UCU	0.00264979	3443.67	0.0106301	4.90E-04	5439	0.00584902
EBT00051365670	Arg1(UCU)	T	54	T-loop	UCU	1.88E-04	3480.67	0.00238846	1.93E-04	5471	7.31E-04
EBT00051365670	Arg1(UCU)	T	55	T-loop	UCU	9.37E-05	3489	0	2.65E-04	5475	0
EBT00051365670	Arg1(UCU)	C	56	T-loop	UCU	4.81E-04	3479	0.00114843	0.00153439	5461.67	2.44E-04
EBT00051365670	Arg1(UCU)	G	57	T-loop	UCU	7.49E-04	3483	0.0019104	0.00149316	5463	7.32E-04
EBT00051365670	Arg1(UCU)	A	58	T-loop	UCU	9.30E-05	3489.67	0	1.88E-04	5467	0.00127877
EBT00051365670	Arg1(UCU)	G	59	T-loop	UCU	8.64E-04	3485.33	0	0.00227292	5474	0
EBT00051365670	Arg1(UCU)	T	60	T-loop	UCU	0	3479.67	2.87E-04	4.05E-04	5430.67	0.00640361
EBT00051365670	Arg1(UCU)	C	61	T-stem	UCU	9.33E-05	3480.67	0	2.88E-04	5465.67	0
EBT00051365670	Arg1(UCU)	C	62	T-stem	UCU	0	3413	0.0215023	0.00116425	5370.33	0.0167826
EBT00051365670	Arg1(UCU)	T	63	T-stem	UCU	0	3488	0	6.23E-05	5462	9.15E-04
EBT00051365670	Arg1(UCU)	G	64	T-stem	UCU	0.00160049	3483.67	0	0.00490696	5467	0
EBT00051365670	Arg1(UCU)	C	65	T-stem	UCU	9.35E-05	3471.33	0.00439771	0.00104406	5391	0.0130591
EBT00051365670	Arg1(UCU)	C	66	Acc-stem	UCU	2.87E-04	3486.67	0	9.06E-04	5462.33	0
EBT00051365670	Arg1(UCU)	G	67	Acc-stem	UCU	9.34E-05	3473.33	0	3.51E-04	5442.33	0
EBT00051365670	Arg1(UCU)	G	68	Acc-stem	UCU	0.002227	3471.67	0.00334928	0.00146935	5425	0.00403892
EBT00051365670	Arg1(UCU)	G	69	Acc-stem	UCU	7.61E-04	3483.33	5.74E-04	6.81E-04	5447	0
EBT00051365670	Arg1(UCU)	T	70	Acc-stem	UCU	1.88E-04	3485.33	0	1.26E-04	5417	0.00702676
EBT00051365670	Arg1(UCU)	G	71	Acc-stem	UCU	3.75E-04	3481.33	0	4.07E-04	5455.33	0
EBT00051365670	Arg1(UCU)	C	72	Acc-stem	UCU	0.00130883	3481.33	0.00162508	7.76E-04	5451.67	9.16E-04
EBT00051365670	Arg1(UCU)	G	73	In between	UCU	0.00192297	3487	8.60E-04	0.00146126	5456.67	0.0021335
EBT00051365670	Arg1(UCU)	C	74	CCA	UCU	0	3490	0	0	5468.33	0
EBT00051365670	Arg1(UCU)	C	75	CCA	UCU	0	3392	0	0	5264	0
EBT00051365670	Arg1(UCU)	A	76	CCA	UCU	0	3112	0	0	4593.67	0
EBT00051365808	Asp1(GUC)	G	1	Acc-stem	GUC	NA	0	NA	NA	0.333333	NA
EBT00051365808	Asp1(GUC)	G	2	Acc-stem	GUC	NA	0.333333	NA	NA	0.333333	NA
EBT00051365808	Asp1(GUC)	A	3	Acc-stem	GUC	NA	0.666667	NA	NA	0.333333	NA
EBT00051365808	Asp1(GUC)	G	4	Acc-stem	GUC	NA	0.333333	NA	NA	0.333333	NA
EBT00051365808	Asp1(GUC)	C	5	Acc-stem	GUC	NA	0.666667	NA	NA	0	NA
EBT00051365808	Asp1(GUC)	G	6	Acc-stem	GUC	NA	0.666667	NA	NA	0.333333	NA
EBT00051365808	Asp1(GUC)	G	7	Acc-stem	GUC	NA	0.333333	NA	NA	0	NA
EBT00051365808	Asp1(GUC)	T	8	In between	GUC	NA	0.666667	NA	NA	0.333333	NA
EBT00051365808	Asp1(GUC)	A	9	In between	GUC	NA	0.333333	NA	NA	0.333333	NA
EBT00051365808	Asp1(GUC)	G	10	D-stem	GUC	NA	0.333333	NA	NA	0	NA
EBT00051365808	Asp1(GUC)	T	11	D-stem	GUC	NA	0.333333	NA	NA	0.333333	NA
EBT00051365808	Asp1(GUC)	T	12	D-stem	GUC	NA	0.666667	NA	NA	0.333333	NA
EBT00051365808	Asp1(GUC)	C	13	D-stem	GUC	NA	0	NA	NA	0.333333	NA
EBT00051365808	Asp1(GUC)	A	14	D-loop	GUC	NA	0.666667	NA	NA	0	NA
EBT00051365808	Asp1(GUC)	G	15	D-loop	GUC	NA	0	NA	NA	0.333333	NA
EBT00051365808	Asp1(GUC)	T	16	D-loop	GUC	NA	0.666667	NA	NA	0.333333	NA
EBT00051365808	Asp1(GUC)	C	17	D-loop	GUC	NA	0.333333	NA	NA	0	NA
EBT00051365808	Asp1(GUC)	G	18	D-loop	GUC	NA	0.333333	NA	NA	0.333333	NA
EBT00051365808	Asp1(GUC)	G	19	D-loop	GUC	NA	0.333333	NA	NA	0.333333	NA
EBT00051365808	Asp1(GUC)	T	20	D-loop	GUC	NA	0.666667	NA	NA	0	NA
EBT00051365808	Asp1(GUC)	T	20a	D-loop	GUC	NA	0	NA	NA	0.333333	NA
EBT00051365808	Asp1(GUC)	A	21	D-loop	GUC	NA	0.333333	NA	NA	0.333333	NA
EBT00051365808	Asp1(GUC)	G	22	D-stem	GUC	NA	0.666667	NA	NA	0.333333	NA
EBT00051365808	Asp1(GUC)	A	23	D-stem	GUC	NA	1.66667	NA	NA	0	NA
EBT00051365808	Asp1(GUC)	A	24	D-stem	GUC	NA	1.66667	NA	NA	0	NA
EBT00051365808	Asp1(GUC)	T	25	D-stem	GUC	NA	1.33333	NA	NA	0.333333	NA
EBT00051365808	Asp1(GUC)	A	26	In between	GUC	NA	1.33333	NA	NA	0.333333	NA
EBT00051365808	Asp1(GUC)	C	27	Ac-stem	GUC	NA	1.33333	NA	NA	0.666667	NA
EBT00051365808	Asp1(GUC)	C	28	Ac-stem	GUC	NA	2	NA	NA	0.333333	NA
EBT00051365808	Asp1(GUC)	G	29	Ac-stem	GUC	NA	1.66667	NA	NA	0.666667	NA
EBT00051365808	Asp1(GUC)	G	30	Ac-stem	GUC	NA	1.66667	NA	NA	0.666667	NA
EBT00051365808	Asp1(GUC)	C	31	Ac-stem	GUC	NA	3.66667	NA	NA	1	NA
EBT00051365808	Asp1(GUC)	C	32	Ac-loop	GUC	NA	3	NA	NA	1	NA
EBT00051365808	Asp1(GUC)	T	33	Ac-loop	GUC	NA	5	NA	NA	1.33333	NA
EBT00051365808	Asp1(GUC)	G	34	Ac-loop	GUC	NA	4.66667	NA	NA	1	NA
EBT00051365808	Asp1(GUC)	T	35	Ac-loop	GUC	NA	7	NA	NA	2.66667	NA
EBT00051365808	Asp1(GUC)	C	36	Ac-loop	GUC	NA	6.66667	NA	NA	2.33333	NA
EBT00051365808	Asp1(GUC)	A	37	Ac-loop	GUC	NA	8.33333	NA	NA	2.66667	NA
EBT00051365808	Asp1(GUC)	C	38	Ac-loop	GUC	NA	8	NA	NA	6.33333	NA
EBT00051365808	Asp1(GUC)	G	39	Ac-stem	GUC	NA	10	NA	NA	6	NA
EBT00051365808	Asp1(GUC)	C	40	Ac-stem	GUC	NA	11	NA	NA	7.33333	NA
EBT00051365808	Asp1(GUC)	C	41	Ac-stem	GUC	NA	10.3333	NA	NA	7.33333	NA
EBT00051365808	Asp1(GUC)	G	42	Ac-stem	GUC	NA	11	NA	NA	6.66667	NA
EBT00051365808	Asp1(GUC)	G	43	Ac-stem	GUC	NA	10.6667	NA	NA	7.33333	NA
EBT00051365808	Asp1(GUC)	G	44	V-region	GUC	NA	10.6667	NA	NA	7	NA
EBT00051365808	Asp1(GUC)	G	45	V-region	GUC	NA	11.6667	NA	NA	7.33333	NA
EBT00051365808	Asp1(GUC)	G	46	V-region	GUC	NA	11.6667	NA	NA	7.66667	NA
EBT00051365808	Asp1(GUC)	T	47	V-region	GUC	NA	13.3333	NA	NA	8.66667	NA
EBT00051365808	Asp1(GUC)	C	48	V-region	GUC	NA	18.6667	NA	NA	8.66667	NA
EBT00051365808	Asp1(GUC)	G	49	T-stem	GUC	NA	21.3333	NA	NA	9	NA
EBT00051365808	Asp1(GUC)	C	50	T-stem	GUC	NA	28.6667	NA	NA	12.6667	NA
EBT00051365808	Asp1(GUC)	G	51	T-stem	GUC	NA	28.6667	NA	NA	14	NA
EBT00051365808	Asp1(GUC)	G	52	T-stem	GUC	NA	49.6667	NA	NA	26.3333	NA
EBT00051365808	Asp1(GUC)	G	53	T-stem	GUC	NA	67	NA	NA	35.3333	NA
EBT00051365808	Asp1(GUC)	T	54	T-loop	GUC	0	100	0.0291262	NA	55	NA
EBT00051365808	Asp1(GUC)	T	55	T-loop	GUC	0	103	0.00961539	NA	58.6667	NA
EBT00051365808	Asp1(GUC)	C	56	T-loop	GUC	0	104	0	NA	58.6667	NA
EBT00051365808	Asp1(GUC)	G	57	T-loop	GUC	0	103.667	0.00320513	NA	59.6667	NA
EBT00051365808	Asp1(GUC)	A	58	T-loop	GUC	0	104	0	NA	59.3333	NA
EBT00051365808	Asp1(GUC)	G	59	T-loop	GUC	0	104	0	NA	59.3333	NA
EBT00051365808	Asp1(GUC)	T	60	T-loop	GUC	0	103	0.00322581	NA	59.3333	NA
EBT00051365808	Asp1(GUC)	C	61	T-stem	GUC	0	103.333	0	NA	59.3333	NA
EBT00051365808	Asp1(GUC)	C	62	T-stem	GUC	0	103.333	0.00641026	NA	58.6667	NA
EBT00051365808	Asp1(GUC)	C	63	T-stem	GUC	0	104	0	NA	59.6667	NA
EBT00051365808	Asp1(GUC)	G	64	T-stem	GUC	0	103	0.00961539	NA	58.6667	NA
EBT00051365808	Asp1(GUC)	T	65	T-stem	GUC	0	104	0	NA	59.3333	NA
EBT00051365808	Asp1(GUC)	C	66	Acc-stem	GUC	0	104	0	NA	59	NA
EBT00051365808	Asp1(GUC)	C	67	Acc-stem	GUC	0	103.667	0	NA	59.3333	NA
EBT00051365808	Asp1(GUC)	G	68	Acc-stem	GUC	0	103.333	0.00321543	NA	59.3333	NA
EBT00051365808	Asp1(GUC)	C	69	Acc-stem	GUC	0	103.667	0.00320513	NA	59	NA
EBT00051365808	Asp1(GUC)	T	70	Acc-stem	GUC	0	104	0	NA	59.6667	NA
EBT00051365808	Asp1(GUC)	C	71	Acc-stem	GUC	0	102	0.0129032	NA	58.6667	NA
EBT00051365808	Asp1(GUC)	C	72	Acc-stem	GUC	0	103.333	0	NA	59.3333	NA
EBT00051365808	Asp1(GUC)	G	73	In between	GUC	0.00648778	103.333	0.00321543	NA	59.6667	NA
EBT00051365808	Asp1(GUC)	C	74	CCA	GUC	0	103.667	0	NA	59.3333	NA
EBT00051365808	Asp1(GUC)	C	75	CCA	GUC	0	100	0	NA	59	NA
EBT00051365808	Asp1(GUC)	A	76	CCA	GUC	NA	96	NA	NA	53.6667	NA
EBT00051365908	Asp2(GUC)	G	1	Acc-stem	GUC	NA	2.66667	NA	NA	2	NA
EBT00051365908	Asp2(GUC)	C	2	Acc-stem	GUC	NA	2.66667	NA	NA	1.66667	NA
EBT00051365908	Asp2(GUC)	A	3	Acc-stem	GUC	NA	2.66667	NA	NA	2	NA
EBT00051365908	Asp2(GUC)	G	4	Acc-stem	GUC	NA	3	NA	NA	1.66667	NA
EBT00051365908	Asp2(GUC)	C	5	Acc-stem	GUC	NA	3.33333	NA	NA	1.66667	NA
EBT00051365908	Asp2(GUC)	G	6	Acc-stem	GUC	NA	2.66667	NA	NA	1.66667	NA
EBT00051365908	Asp2(GUC)	G	7	Acc-stem	GUC	NA	2.33333	NA	NA	2.33333	NA
EBT00051365908	Asp2(GUC)	T	8	In between	GUC	NA	3	NA	NA	2	NA
EBT00051365908	Asp2(GUC)	A	9	In between	GUC	NA	3	NA	NA	2	NA
EBT00051365908	Asp2(GUC)	G	10	D-stem	GUC	NA	2	NA	NA	2.33333	NA
EBT00051365908	Asp2(GUC)	T	11	D-stem	GUC	NA	3.33333	NA	NA	2	NA
EBT00051365908	Asp2(GUC)	T	12	D-stem	GUC	NA	4.33333	NA	NA	2.33333	NA
EBT00051365908	Asp2(GUC)	C	13	D-stem	GUC	NA	3.66667	NA	NA	2.33333	NA
EBT00051365908	Asp2(GUC)	A	14	D-loop	GUC	NA	2.66667	NA	NA	2	NA
EBT00051365908	Asp2(GUC)	G	15	D-loop	GUC	NA	3.66667	NA	NA	1.66667	NA
EBT00051365908	Asp2(GUC)	T	16	D-loop	GUC	NA	3.66667	NA	NA	2	NA
EBT00051365908	Asp2(GUC)	C	17	D-loop	GUC	NA	4.33333	NA	NA	1.33333	NA
EBT00051365908	Asp2(GUC)	G	18	D-loop	GUC	NA	5	NA	NA	2.33333	NA
EBT00051365908	Asp2(GUC)	G	19	D-loop	GUC	NA	4.33333	NA	NA	2	NA
EBT00051365908	Asp2(GUC)	T	20	D-loop	GUC	NA	7	NA	NA	3.33333	NA
EBT00051365908	Asp2(GUC)	T	20a	D-loop	GUC	NA	8.66667	NA	NA	4.33333	NA
EBT00051365908	Asp2(GUC)	A	21	D-loop	GUC	NA	7.66667	NA	NA	3.66667	NA
EBT00051365908	Asp2(GUC)	G	22	D-stem	GUC	NA	9	NA	NA	4.66667	NA
EBT00051365908	Asp2(GUC)	A	23	D-stem	GUC	NA	9.66667	NA	NA	5.33333	NA
EBT00051365908	Asp2(GUC)	A	24	D-stem	GUC	NA	14.3333	NA	NA	6.33333	NA
EBT00051365908	Asp2(GUC)	T	25	D-stem	GUC	NA	16	NA	NA	9.66667	NA
EBT00051365908	Asp2(GUC)	A	26	In between	GUC	NA	17	NA	NA	9.66667	NA
EBT00051365908	Asp2(GUC)	C	27	Ac-stem	GUC	NA	19	NA	NA	10.6667	NA
EBT00051365908	Asp2(GUC)	C	28	Ac-stem	GUC	NA	18.3333	NA	NA	10	NA
EBT00051365908	Asp2(GUC)	G	29	Ac-stem	GUC	NA	19.6667	NA	NA	11.3333	NA
EBT00051365908	Asp2(GUC)	G	30	Ac-stem	GUC	NA	22	NA	NA	10.6667	NA
EBT00051365908	Asp2(GUC)	C	31	Ac-stem	GUC	NA	25.3333	NA	NA	14.6667	NA
EBT00051365908	Asp2(GUC)	C	32	Ac-loop	GUC	NA	26.3333	NA	NA	16.6667	NA
EBT00051365908	Asp2(GUC)	T	33	Ac-loop	GUC	NA	39	NA	NA	24.3333	NA
EBT00051365908	Asp2(GUC)	G	34	Ac-loop	GUC	NA	40.6667	NA	NA	25	NA
EBT00051365908	Asp2(GUC)	T	35	Ac-loop	GUC	NA	72.6667	NA	NA	33.6667	NA
EBT00051365908	Asp2(GUC)	C	36	Ac-loop	GUC	NA	73.3333	NA	NA	35.3333	NA
EBT00051365908	Asp2(GUC)	A	37	Ac-loop	GUC	NA	86	NA	NA	47.3333	NA
EBT00051365908	Asp2(GUC)	C	38	Ac-loop	GUC	NA	96	NA	NA	54.6667	NA
EBT00051365908	Asp2(GUC)	G	39	Ac-stem	GUC	0.0221027	104.667	0.0924855	NA	58.3333	NA
EBT00051365908	Asp2(GUC)	C	40	Ac-stem	GUC	0	115.333	0	NA	63.6667	NA
EBT00051365908	Asp2(GUC)	C	41	Ac-stem	GUC	0	115.333	0	NA	65.3333	NA
EBT00051365908	Asp2(GUC)	G	42	Ac-stem	GUC	0	115.333	0.0520548	NA	63.6667	NA
EBT00051365908	Asp2(GUC)	G	43	Ac-stem	GUC	0.00595238	121.667	0.0135135	NA	64	NA
EBT00051365908	Asp2(GUC)	G	44	V-region	GUC	0	123.333	0.00269542	NA	65.6667	NA
EBT00051365908	Asp2(GUC)	G	45	V-region	GUC	0	123.667	0.0388601	NA	69.3333	NA
EBT00051365908	Asp2(GUC)	G	46	V-region	GUC	0.0582502	128.667	0.108545	NA	72	NA
EBT00051365908	Asp2(GUC)	T	47	V-region	GUC	0.0961235	144.333	0.42649	NA	81.6667	NA
EBT00051365908	Asp2(GUC)	C	48	V-region	GUC	0.0225195	251.667	0.139111	NA	84.3333	NA
EBT00051365908	Asp2(GUC)	G	49	T-stem	GUC	0.0551351	292.333	0.202002	0.102251	106.667	0.333333
EBT00051365908	Asp2(GUC)	C	50	T-stem	GUC	0.039431	366.333	0.0924855	0.0805195	160	0.15493
EBT00051365908	Asp2(GUC)	G	51	T-stem	GUC	0.0713656	403.667	0.35067	0.0822682	189.333	0.425683
EBT00051365908	Asp2(GUC)	G	52	T-stem	GUC	0.0463939	621.667	0.309003	0.0266069	329.667	0.345899
EBT00051365908	Asp2(GUC)	G	53	T-stem	GUC	0.0170012	899.667	0.401021	0.00888116	504	0.44186
EBT00051365908	Asp2(GUC)	T	54	T-loop	GUC	0.00106017	1502	0.0455412	5.36E-04	903	0.0747951
EBT00051365908	Asp2(GUC)	T	55	T-loop	GUC	1.95E-04	1573.67	0	5.75E-04	976	0
EBT00051365908	Asp2(GUC)	C	56	T-loop	GUC	4.17E-04	1566.67	0.00444821	2.88E-04	972.667	0.00748299
EBT00051365908	Asp2(GUC)	G	57	T-loop	GUC	0	1573.67	0	0	980	0
EBT00051365908	Asp2(GUC)	A	58	T-loop	GUC	0	1563.33	0.00782737	0	972	0.00681199
EBT00051365908	Asp2(GUC)	G	59	T-loop	GUC	0	1575.67	0.00190034	0	978.667	3.40E-04
EBT00051365908	Asp2(GUC)	T	60	T-loop	GUC	0	1578.67	0	0	979	0
EBT00051365908	Asp2(GUC)	C	61	T-stem	GUC	0	1571.33	0	0	978.667	0
EBT00051365908	Asp2(GUC)	C	62	T-stem	GUC	0	1556.67	0.00405204	0	967.333	0.0071844
EBT00051365908	Asp2(GUC)	C	63	T-stem	GUC	0	1563	0.00340064	0	974.333	0.00408859
EBT00051365908	Asp2(GUC)	G	64	T-stem	GUC	7.09E-04	1568.33	0.0061259	0	978.333	0.00204012
EBT00051365908	Asp2(GUC)	T	65	T-stem	GUC	0	1578	0	0	980.333	0
EBT00051365908	Asp2(GUC)	C	66	Acc-stem	GUC	0	1564.33	0	0	969.333	0.00445053
EBT00051365908	Asp2(GUC)	C	67	Acc-stem	GUC	0	1560.33	0.00510096	0	973.667	0.0034118
EBT00051365908	Asp2(GUC)	G	68	Acc-stem	GUC	4.32E-04	1568.33	0.0063358	0	977	0
EBT00051365908	Asp2(GUC)	C	69	Acc-stem	GUC	1.95E-04	1578.33	0	0	974.667	0.00408719
EBT00051365908	Asp2(GUC)	T	70	Acc-stem	GUC	6.26E-04	1575	0	2.86E-04	978.667	0.00203943
EBT00051365908	Asp2(GUC)	G	71	Acc-stem	GUC	0	1572.33	0.00190436	2.85E-04	980.667	0
EBT00051365908	Asp2(GUC)	C	72	Acc-stem	GUC	2.08E-04	1575.33	0	0	975	0.00476353
EBT00051365908	Asp2(GUC)	G	73	In between	GUC	7.10E-04	1573.67	0.00105798	2.85E-04	979.667	6.80E-04
EBT00051365908	Asp2(GUC)	C	74	CCA	GUC	0	1575.33	0	0	980.333	0
EBT00051365908	Asp2(GUC)	C	75	CCA	GUC	0	1561.33	0	0	966.667	0
EBT00051365908	Asp2(GUC)	A	76	CCA	GUC	0	1499	0.969642	0	916.667	0.97585
EBT00051366161	Thr1(UGU)	G	1	Acc-stem	UGU	0	49376.7	0.02022	0	37957	0.01534
EBT00051366161	Thr1(UGU)	C	2	Acc-stem	UGU	0	50395.7	0.00637499	0	38548.3	0.00887891
EBT00051366161	Thr1(UGU)	C	3	Acc-stem	UGU	0	50719	0.00259582	0	38893.7	0.00238543
EBT00051366161	Thr1(UGU)	G	4	Acc-stem	UGU	9.75E-04	50851	0.00376804	7.29E-04	38986.7	0.00316199
EBT00051366161	Thr1(UGU)	G	5	Acc-stem	UGU	0.00254851	51043.3	0.0126569	0.00218862	39110.3	0.0115333
EBT00051366161	Thr1(UGU)	T	6	Acc-stem	UGU	3.09E-04	51697.7	0.00732856	3.48E-04	39566.7	0.0106932
EBT00051366161	Thr1(UGU)	A	7	Acc-stem	UGU	1.32E-04	52079.3	0.00768508	1.32E-04	39994.3	0.0118431
EBT00051366161	Thr1(UGU)	T	8	In between	UGU	0.00415009	52482.7	0.00280573	0.00389274	40473.7	0.00278417
EBT00051366161	Thr1(UGU)	A	9	In between	UGU	3.11E-04	52630.3	0.00127773	4.21E-04	40586.7	8.29E-04
EBT00051366161	Thr1(UGU)	G	10	D-stem	UGU	0.00307295	52697.7	0.00727777	0.00191901	40620.3	0.0087202
EBT00051366161	Thr1(UGU)	C	11	D-stem	UGU	7.03E-04	53084	0.0175088	0.00105317	40977.7	0.0177069
EBT00051366161	Thr1(UGU)	T	12	D-stem	UGU	1.99E-04	54030	0	2.28E-04	41716.3	0
EBT00051366161	Thr1(UGU)	C	13	D-stem	UGU	7.48E-04	53793	0	0.00237947	41610.3	0
EBT00051366161	Thr1(UGU)	A	14	D-loop	UGU	1.88E-04	53723.7	0.0100305	1.40E-04	41592	0.00840002
EBT00051366161	Thr1(UGU)	G	15	D-loop	UGU	0.00134372	54268	0.00900276	7.62E-04	41944.3	0.00674102
EBT00051366161	Thr1(UGU)	C	16	D-loop	UGU	9.52E-04	54761	0.00876097	0.0014649	42229	0.00963109
EBT00051366161	Thr1(UGU)	T	17	D-loop	UGU	5.16E-04	55245	0.00134973	7.81E-04	42639.7	0.00148311
EBT00051366161	Thr1(UGU)	G	18	D-loop	UGU	5.06E-04	55319.7	0.00632279	2.90E-04	42703	0.00643715
EBT00051366161	Thr1(UGU)	G	19	D-loop	UGU	7.17E-04	55671.7	0.0174837	4.21E-04	42979.7	0.0166411
EBT00051366161	Thr1(UGU)	T	20	D-loop	UGU	5.55E-04	56662.3	0.0039902	5.67E-04	43707	0.00481196
EBT00051366161	Thr1(UGU)	A	21	D-loop	UGU	2.14E-04	56889.3	0.00114127	1.54E-04	43918.3	0
EBT00051366161	Thr1(UGU)	G	22	D-stem	UGU	0.00119962	56954.3	0	0.00118458	43907	0
EBT00051366161	Thr1(UGU)	A	23	D-stem	UGU	2.20E-04	56858.3	0.00675459	2.17E-04	43818.7	0.00725738
EBT00051366161	Thr1(UGU)	G	24	D-stem	UGU	0.00137557	57245	0.00677247	7.24E-04	44139	0.00450322
EBT00051366161	Thr1(UGU)	C	25	D-stem	UGU	5.54E-04	57635.3	0.012716	8.95E-04	44338.7	0.0112981
EBT00051366161	Thr1(UGU)	A	26	In between	UGU	1.89E-04	58377.7	0.00769444	1.05E-04	44845.3	0.00536001
EBT00051366161	Thr1(UGU)	A	27	Ac-stem	UGU	2.77E-04	58830.3	0	1.57E-04	45087	0
EBT00051366161	Thr1(UGU)	C	28	Ac-stem	UGU	3.65E-04	58772	0.00169295	2.20E-04	45066	0.00136649
EBT00051366161	Thr1(UGU)	T	29	Ac-stem	UGU	2.99E-04	58871.7	7.92E-04	3.85E-04	45127.7	1.11E-04
EBT00051366161	Thr1(UGU)	G	30	Ac-stem	UGU	0.00200213	58918.3	0	9.04E-04	45132.7	0
EBT00051366161	Thr1(UGU)	A	31	Ac-stem	UGU	2.00E-04	58643.3	0.0195554	1.34E-04	44777	0.0180985
EBT00051366161	Thr1(UGU)	C	32	Ac-loop	UGU	2.65E-04	59813	0.0100682	6.05E-04	45602.3	0.00828561
EBT00051366161	Thr1(UGU)	T	33	Ac-loop	UGU	3.73E-04	60421.3	0.0139746	4.12E-04	45983.3	0.0115221
EBT00051366161	Thr1(UGU)	T	34	Ac-loop	UGU	0.00141858	61277.7	0.00760627	8.53E-04	46519.3	0.00501918
EBT00051366161	Thr1(UGU)	G	35	Ac-loop	UGU	7.51E-04	61747.3	0.0186686	4.11E-04	46754	0.0135871
EBT00051366161	Thr1(UGU)	T	36	Ac-loop	UGU	1.61E-04	62922	2.54E-04	1.63E-04	47398	3.59E-04
EBT00051366161	Thr1(UGU)	A	37	Ac-loop	UGU	8.46E-04	62938	0.0197693	8.25E-04	47415	0.0113843
EBT00051366161	Thr1(UGU)	A	38	Ac-loop	UGU	9.98E-05	64207.3	0.0220943	1.41E-04	47961	0.0210443
EBT00051366161	Thr1(UGU)	T	39	Ac-stem	UGU	1.12E-04	65658	0	1.42E-04	48992	0
EBT00051366161	Thr1(UGU)	C	40	Ac-stem	UGU	2.99E-04	65241.7	0	6.27E-04	48609.7	0
EBT00051366161	Thr1(UGU)	A	41	Ac-stem	UGU	1.80E-04	64949.3	0.0170659	1.48E-04	48566.7	0.015088
EBT00051366161	Thr1(UGU)	G	42	Ac-stem	UGU	6.96E-04	66077	0.00687862	2.89E-04	49310.7	0.00576652
EBT00051366161	Thr1(UGU)	T	43	Ac-stem	UGU	1.93E-04	66534.7	0	4.31E-04	49596.7	0
EBT00051366161	Thr1(UGU)	A	44	V-region	UGU	1.98E-04	66135.7	0.00790547	1.96E-04	49280	0.00795834
EBT00051366161	Thr1(UGU)	G	45	V-region	UGU	0.00116733	66662.7	0.00172712	7.45E-04	49675.3	0.00111266
EBT00051366161	Thr1(UGU)	G	46	V-region	UGU	0.00452428	66778	0.00779563	0.00358929	49730.7	0.00731248
EBT00051366161	Thr1(UGU)	T	47	V-region	UGU	9.87E-04	67302.7	0	2.31E-04	50097	0
EBT00051366161	Thr1(UGU)	C	48	V-region	UGU	0.00120228	66995.3	0.00151522	0.00217978	49810	0.00201027
EBT00051366161	Thr1(UGU)	C	49	T-stem	UGU	0.00369368	67097	0.0011661	0.00972893	49910.3	0.00146049
EBT00051366161	Thr1(UGU)	C	50	T-stem	UGU	6.24E-04	67175.3	2.23E-04	0.00115147	49983.3	6.60E-04
EBT00051366161	Thr1(UGU)	G	51	T-stem	UGU	0.00171826	67190.3	0.00348041	0.00100061	50016.3	0.00198872
EBT00051366161	Thr1(UGU)	G	52	T-stem	UGU	0.00147064	67425	0.00278053	9.63E-04	50116	0.00389569
EBT00051366161	Thr1(UGU)	G	53	T-stem	UGU	0.00166016	67613	0.0057058	0.00109708	50312	0.00435368
EBT00051366161	Thr1(UGU)	T	54	T-loop	UGU	1.30E-04	68001	0	2.08E-04	50532	0
EBT00051366161	Thr1(UGU)	T	55	T-loop	UGU	1.93E-04	67971.7	0	1.73E-04	50512.7	0
EBT00051366161	Thr1(UGU)	C	56	T-loop	UGU	4.99E-04	67788	9.82E-04	5.92E-04	50323.7	0.0016202
EBT00051366161	Thr1(UGU)	G	57	T-loop	UGU	0.00153134	67854.7	0.00702425	0.00102573	50405.3	0.00713057
EBT00051366161	Thr1(UGU)	A	58	T-loop	UGU	1.92E-04	68334.7	0	1.93E-04	50767.3	0
EBT00051366161	Thr1(UGU)	C	59	T-loop	UGU	6.43E-04	67795.3	2.51E-04	0.00177591	50412.3	0
EBT00051366161	Thr1(UGU)	T	60	T-loop	UGU	2.43E-04	67812.3	0.0015999	2.90E-04	50398.7	7.01E-04
EBT00051366161	Thr1(UGU)	C	61	T-stem	UGU	4.64E-04	67921	0	0.00109902	50434	0
EBT00051366161	Thr1(UGU)	C	62	T-stem	UGU	4.57E-04	67684.7	0	5.07E-04	50265.3	0
EBT00051366161	Thr1(UGU)	T	63	T-stem	UGU	3.20E-04	67426.7	0.00192924	2.17E-04	50063.3	0.00184093
EBT00051366161	Thr1(UGU)	G	64	T-stem	UGU	0.00282712	67557	0.00308414	0.00239881	50155.7	0.0034044
EBT00051366161	Thr1(UGU)	G	65	T-stem	UGU	0.00381492	67766	0	0.00319379	50327	0
EBT00051366161	Thr1(UGU)	T	66	Acc-stem	UGU	1.84E-04	67279.7	0	2.19E-04	49921.3	0
EBT00051366161	Thr1(UGU)	G	67	Acc-stem	UGU	0.00188043	53856	0	8.86E-04	41172	0
EBT00051366161	Thr1(UGU)	C	68	Acc-stem	UGU	0.00152867	29676.7	0.547515	0.00256067	21966	0.548888
EBT00051366161	Thr1(UGU)	C	69	Acc-stem	UGU	8.95E-04	65586	0	0.00167266	48693	0
EBT00051366161	Thr1(UGU)	G	70	Acc-stem	UGU	0.00141858	43360.3	0.334457	9.51E-04	31618	0.347755
EBT00051366161	Thr1(UGU)	G	71	Acc-stem	UGU	0.00118608	65150.3	0	9.86E-04	48475.7	0
EBT00051366161	Thr1(UGU)	C	72	Acc-stem	UGU	4.09E-04	63535.7	0	5.26E-04	46766	0
EBT00051366161	Thr1(UGU)	A	73	In between	UGU	0.0011452	43618.3	0.319986	0.00106803	30108.3	0.372172
EBT00051366161	Thr1(UGU)	C	74	CCA	UGU	9.38E-05	64143.3	0.0416737	6.00E-05	47956.3	0.0340408
EBT00051366161	Thr1(UGU)	C	75	CCA	UGU	0	66932.7	0	0	49646.3	0
EBT00051366161	Thr1(UGU)	A	76	CCA	UGU	0	64586.7	0	0	47887.7	0
EBT00051366328	Trp1(CCA)	A	1	Acc-stem	CCA	0	18328.3	0.0239811	0	18930	0.0308708
EBT00051366328	Trp1(CCA)	G	2	Acc-stem	CCA	0	18778.7	0.00212555	0	19533	8.01E-04
EBT00051366328	Trp1(CCA)	G	3	Acc-stem	CCA	0	18818.7	0.00533836	0	19548.7	0.00417714
EBT00051366328	Trp1(CCA)	C	4	Acc-stem	CCA	5.16E-04	18919.7	0	0.00117454	19630.7	0
EBT00051366328	Trp1(CCA)	C	5	Acc-stem	CCA	5.85E-04	18908.3	0	8.34E-04	19586	0
EBT00051366328	Trp1(CCA)	A	6	Acc-stem	CCA	5.73E-04	18790.7	0.0152158	9.86E-04	19329.3	0.0238368
EBT00051366328	Trp1(CCA)	G	7	Acc-stem	CCA	0.00205054	19081	0.0098765	3.91E-04	19801.3	0.00900841
EBT00051366328	Trp1(CCA)	T	8	In between	CCA	3.64E-04	19271.3	0.00263943	2.38E-04	19981.3	0.00292748
EBT00051366328	Trp1(CCA)	A	9	In between	CCA	1.35E-04	19322.3	0	1.32E-04	20040	0
EBT00051366328	Trp1(CCA)	G	10	D-stem	CCA	0.00133164	19299.3	9.84E-04	5.84E-04	20025	0
EBT00051366328	Trp1(CCA)	C	11	D-stem	CCA	3.89E-04	19318.3	0.0101453	5.53E-04	20012.3	0.0118017
EBT00051366328	Trp1(CCA)	T	12	D-stem	CCA	2.35E-04	19516.3	0	1.63E-04	20251.3	0
EBT00051366328	Trp1(CCA)	C	13	D-stem	CCA	7.89E-04	19432.7	0.0105063	0.00119649	20162.3	0.0104538
EBT00051366328	Trp1(CCA)	A	14	D-loop	CCA	3.80E-04	19639	0.00931547	2.66E-04	20375.3	0.008789
EBT00051366328	Trp1(CCA)	A	15	D-loop	CCA	2.24E-04	19823.7	0.00541851	1.10E-04	20556	0.00440742
EBT00051366328	Trp1(CCA)	T	16	D-loop	CCA	9.91E-05	19931.7	0	1.49E-04	20647	0
EBT00051366328	Trp1(CCA)	T	17	D-loop	CCA	5.43E-04	19756	0.010237	7.96E-04	20446.3	0.00987877
EBT00051366328	Trp1(CCA)	G	18	D-loop	CCA	0.00155411	19960.3	0.00453835	7.24E-04	20650.3	0.0027366
EBT00051366328	Trp1(CCA)	G	19	D-loop	CCA	0.00145413	20051.3	0.00291729	8.32E-04	20707	0.00349701
EBT00051366328	Trp1(CCA)	C	20	D-loop	CCA	8.10E-04	20110	0.00733842	0.00139714	20779.7	0.0111983
EBT00051366328	Trp1(CCA)	A	21	D-loop	CCA	2.46E-04	20258.7	0	2.63E-04	21015	0
EBT00051366328	Trp1(CCA)	G	22	D-stem	CCA	0.00264854	20250	0.00811468	0.00106067	21004.3	0.00572772
EBT00051366328	Trp1(CCA)	A	23	D-stem	CCA	9.66E-05	20415.7	0	1.14E-04	21125.3	0
EBT00051366328	Trp1(CCA)	G	24	D-stem	CCA	0.00132199	20374.7	0	5.35E-04	21074	0
EBT00051366328	Trp1(CCA)	C	25	D-stem	CCA	5.61E-04	20258.3	0.00681462	0.00124154	20908	0.00773575
EBT00051366328	Trp1(CCA)	G	26	In between	CCA	0.00147026	20397.3	0.00220131	7.27E-04	21071	0.00112193
EBT00051366328	Trp1(CCA)	G	27	Ac-stem	CCA	0.0018861	20442.3	0	9.68E-04	21094.7	0
EBT00051366328	Trp1(CCA)	C	28	Ac-stem	CCA	8.43E-04	19970	0.0277034	0.00139908	20528	0.0307075
EBT00051366328	Trp1(CCA)	G	29	Ac-stem	CCA	7.20E-04	20539	0.00247693	5.95E-04	21178.3	8.02E-04
EBT00051366328	Trp1(CCA)	G	30	Ac-stem	CCA	5.07E-04	20590	0.00239026	2.16E-04	21195.3	0.00150749
EBT00051366328	Trp1(CCA)	T	31	Ac-stem	CCA	2.28E-04	20639.3	0.00280229	2.42E-04	21227.3	0.00280296
EBT00051366328	Trp1(CCA)	C	32	Ac-loop	CCA	0.00117874	20697.3	0.0135515	0.00134111	21287	0.00658017
EBT00051366328	Trp1(CCA)	T	33	Ac-loop	CCA	5.05E-04	20981.7	0	3.85E-04	21428	0
EBT00051366328	Trp1(CCA)	C	34	Ac-loop	CCA	5.54E-04	20279.3	0.0419816	9.80E-04	20707.7	0.0368378
EBT00051366328	Trp1(CCA)	C	35	Ac-loop	CCA	7.56E-04	21168	0	0.00122966	21499.7	0
EBT00051366328	Trp1(CCA)	A	36	Ac-loop	CCA	0.00158977	19269.3	0.177216	9.56E-04	19190	0.164805
EBT00051366328	Trp1(CCA)	A	37	Ac-loop	CCA	0.0740108	23419.7	0.730066	0.0714209	22976.7	0.716582
EBT00051366328	Trp1(CCA)	A	38	Ac-loop	CCA	4.39E-04	86760.7	0.029577	4.86E-04	81070	0.0293459
EBT00051366328	Trp1(CCA)	A	39	Ac-stem	CCA	7.33E-05	89405	0.0251761	6.42E-05	83521	0.0287917
EBT00051366328	Trp1(CCA)	C	40	Ac-stem	CCA	1.47E-04	91714	0.00196964	1.57E-04	85997	0.00343017
EBT00051366328	Trp1(CCA)	C	41	Ac-stem	CCA	7.15E-04	91895	0.00172002	9.24E-04	86293	0.0016313
EBT00051366328	Trp1(CCA)	G	42	Ac-stem	CCA	0.00271684	92053.3	0.00758256	0.00160824	86434	0.00672647
EBT00051366328	Trp1(CCA)	C	43	Ac-stem	CCA	0.00124393	92756.7	0	0.00292476	87019.3	0
EBT00051366328	Trp1(CCA)	A	44	V-region	CCA	3.01E-04	92500	0.00475208	4.44E-04	86746	0.00546874
EBT00051366328	Trp1(CCA)	G	45	V-region	CCA	3.78E-04	92941.7	0.00119287	2.28E-04	87223	0.0015606
EBT00051366328	Trp1(CCA)	G	46	V-region	CCA	0.00289116	93052.7	0	0.0028251	87359.3	0
EBT00051366328	Trp1(CCA)	T	47	V-region	CCA	5.40E-04	92747.3	0.00852356	2.05E-04	86848	0.0099031
EBT00051366328	Trp1(CCA)	T	48	V-region	CCA	1.08E-04	93544.7	0	1.57E-04	87716.7	0
EBT00051366328	Trp1(CCA)	G	49	T-stem	CCA	7.33E-04	93371.7	0.00113396	5.57E-04	87571	9.77E-04
EBT00051366328	Trp1(CCA)	G	50	T-stem	CCA	5.44E-04	93477.7	8.76E-04	4.87E-04	87656.7	8.70E-04
EBT00051366328	Trp1(CCA)	G	51	T-stem	CCA	3.80E-04	93559.7	9.47E-04	2.91E-04	87733	9.07E-04
EBT00051366328	Trp1(CCA)	G	52	T-stem	CCA	3.32E-04	93648.3	0.0024429	2.43E-04	87812.7	0.00265768
EBT00051366328	Trp1(CCA)	G	53	T-stem	CCA	4.31E-04	93877.7	9.26E-04	2.11E-04	88046.7	6.09E-04
EBT00051366328	Trp1(CCA)	T	54	T-loop	CCA	4.00E-05	93964.7	0.00230406	8.41E-05	88100.3	0.00228006
EBT00051366328	Trp1(CCA)	T	55	T-loop	CCA	6.99E-05	94181.7	0	7.03E-05	88301.7	0
EBT00051366328	Trp1(CCA)	C	56	T-loop	CCA	1.49E-04	72807	0.225218	3.07E-04	68368.3	0.224098
EBT00051366328	Trp1(CCA)	G	57	T-loop	CCA	4.02E-04	93971	0	1.49E-04	88114.7	0
EBT00051366328	Trp1(CCA)	A	58	T-loop	CCA	9.08E-05	85322.3	0.0923446	1.08E-04	80197.3	0.0899834
EBT00051366328	Trp1(CCA)	T	59	T-loop	CCA	8.51E-05	94003	0	1.25E-04	88127.3	0
EBT00051366328	Trp1(CCA)	T	60	T-loop	CCA	3.82E-04	93961.7	0	5.14E-04	88087.7	0
EBT00051366328	Trp1(CCA)	C	61	T-stem	CCA	4.51E-04	93442.3	0	8.95E-04	87581	0
EBT00051366328	Trp1(CCA)	C	62	T-stem	CCA	3.42E-04	93236.7	0.00284128	3.53E-04	87383.3	0.00286417
EBT00051366328	Trp1(CCA)	C	63	T-stem	CCA	5.45E-04	93502.3	0.00415016	5.94E-04	87634.3	0.00441551
EBT00051366328	Trp1(CCA)	T	64	T-stem	CCA	1.67E-04	93892	0	2.24E-04	88023	0
EBT00051366328	Trp1(CCA)	C	65	T-stem	CCA	6.89E-04	93713	2.20E-04	8.71E-04	87845	7.62E-04
EBT00051366328	Trp1(CCA)	C	66	Acc-stem	CCA	3.20E-04	93733.7	0	4.63E-04	87912	0
EBT00051366328	Trp1(CCA)	T	67	Acc-stem	CCA	3.30E-04	92861.3	0.00906688	2.13E-04	87114.7	0.00854714
EBT00051366328	Trp1(CCA)	G	68	Acc-stem	CCA	0.00381231	93711	9.56E-04	0.00166592	87865.7	7.51E-04
EBT00051366328	Trp1(CCA)	G	69	Acc-stem	CCA	0.00178066	93800.7	9.59E-04	9.77E-04	87931.7	6.71E-04
EBT00051366328	Trp1(CCA)	C	70	Acc-stem	CCA	9.37E-04	93890.7	0	0.00199082	87990.7	6.06E-05
EBT00051366328	Trp1(CCA)	C	71	Acc-stem	CCA	4.92E-04	93814	0	6.82E-04	87996	0
EBT00051366328	Trp1(CCA)	T	72	Acc-stem	CCA	2.44E-04	90969	0.0285414	2.49E-04	85243	0.0285218
EBT00051366328	Trp1(CCA)	G	73	In between	CCA	0.0022974	93641.7	0.00192208	0.00130816	87745.7	0.00260302
EBT00051366328	Trp1(CCA)	C	74	CCA	CCA	2.56E-05	93822	0	1.86E-05	87974.7	0
EBT00051366328	Trp1(CCA)	C	75	CCA	CCA	0	92239	0	0	85997.3	0
EBT00051366328	Trp1(CCA)	A	76	CCA	CCA	0	88619.7	0	0	81741.3	0
EBT00051366399	Val1(UAC)	G	1	Acc-stem	UAC	0	76502.3	0.00855768	0	56087.7	0.00855552
EBT00051366399	Val1(UAC)	G	2	Acc-stem	UAC	0	77162.7	0.0041985	0	56571.7	0.00546739
EBT00051366399	Val1(UAC)	G	3	Acc-stem	UAC	0	77488	0.00644097	0	56882.7	0.0073064
EBT00051366399	Val1(UAC)	T	4	Acc-stem	UAC	2.87E-04	77990.3	0.00535644	3.24E-04	57301.3	0.00659366
EBT00051366399	Val1(UAC)	G	5	Acc-stem	UAC	0.00154743	78410.3	0.0146443	8.96E-04	57681.7	0.0172421
EBT00051366399	Val1(UAC)	A	6	Acc-stem	UAC	3.37E-04	79575.7	0.0371271	3.41E-04	58693.7	0.0446994
EBT00051366399	Val1(UAC)	T	7	Acc-stem	UAC	1.93E-04	82644	0.00806171	1.62E-04	61440	0.0174473
EBT00051366399	Val1(UAC)	T	8	In between	UAC	0.0582426	83315.7	0.0387134	0.0419238	62531	0.040008
EBT00051366399	Val1(UAC)	A	9	In between	UAC	0.00148673	86671	0.0133832	0.00135615	65137	0.0163051
EBT00051366399	Val1(UAC)	G	10	D-stem	UAC	0.0216013	87846.7	0.0515982	0.0167657	66216.7	0.0572306
EBT00051366399	Val1(UAC)	C	11	D-stem	UAC	9.47E-04	92626	0.0366511	0.00166968	70236.3	0.0483397
EBT00051366399	Val1(UAC)	T	12	D-stem	UAC	2.48E-04	96150	0	2.62E-04	73804	0
EBT00051366399	Val1(UAC)	C	13	D-stem	UAC	7.97E-04	95929	0.0116899	0.00101062	73752.3	0.0221204
EBT00051366399	Val1(UAC)	A	14	D-loop	UAC	5.22E-04	97063.7	0.00370884	4.46E-04	75420.7	0.00540241
EBT00051366399	Val1(UAC)	G	15	D-loop	UAC	0.00674287	97425	0.0237226	0.003982	75830.3	0.0247362
EBT00051366399	Val1(UAC)	C	16	D-loop	UAC	0.00122878	99792.3	0.00878061	0.00120192	77753.7	0.00888878
EBT00051366399	Val1(UAC)	T	17	D-loop	UAC	7.06E-04	100676	0.00124667	6.95E-04	78451	0.00256402
EBT00051366399	Val1(UAC)	G	18	D-loop	UAC	0.00122185	100802	0.00793895	7.25E-04	78652.7	0.00843401
EBT00051366399	Val1(UAC)	G	19	D-loop	UAC	0.00118216	101609	0.00433443	9.39E-04	79321.7	0.00515472
EBT00051366399	Val1(UAC)	G	20	D-loop	UAC	0.0018152	102051	0.00859115	0.00128726	79732.7	0.00990517
EBT00051366399	Val1(UAC)	A	21	D-loop	UAC	2.58E-04	102935	0.00542048	3.69E-04	80530.3	0.00615009
EBT00051366399	Val1(UAC)	G	22	D-stem	UAC	9.86E-04	103496	0	8.83E-04	81028.7	0
EBT00051366399	Val1(UAC)	A	23	D-stem	UAC	0.00123108	61557.3	0.409662	0.00139059	46583	0.429861
EBT00051366399	Val1(UAC)	G	24	D-stem	UAC	0.00100066	104275	0	7.52E-04	81704.7	0
EBT00051366399	Val1(UAC)	C	25	D-stem	UAC	7.11E-04	102401	0.0150183	0.00130581	80072.7	0.0175093
EBT00051366399	Val1(UAC)	A	26	In between	UAC	2.35E-04	103962	0.0211164	2.44E-04	81499.7	0.0198752
EBT00051366399	Val1(UAC)	T	27	Ac-stem	UAC	2.07E-04	106205	0.00316619	2.11E-04	83152.3	0.00430677
EBT00051366399	Val1(UAC)	C	28	Ac-stem	UAC	3.61E-04	106542	0.00224133	5.84E-04	83512	0.00135923
EBT00051366399	Val1(UAC)	T	29	Ac-stem	UAC	2.60E-04	106782	0	2.61E-04	83625.7	0
EBT00051366399	Val1(UAC)	G	30	Ac-stem	UAC	9.88E-04	106700	0.00214784	8.33E-04	83585.7	0.0028155
EBT00051366399	Val1(UAC)	C	31	Ac-stem	UAC	3.13E-04	106929	0.0041011	4.62E-04	83821.7	0.00567811
EBT00051366399	Val1(UAC)	C	32	Ac-loop	UAC	4.72E-04	107370	0.0243645	4.54E-04	84300.3	0.028115
EBT00051366399	Val1(UAC)	T	33	Ac-loop	UAC	1.69E-04	110051	0.0100597	1.94E-04	86739	0.0129424
EBT00051366399	Val1(UAC)	T	34	Ac-loop	UAC	0.00105301	111169	0.0106468	6.80E-04	87876.3	0.0122259
EBT00051366399	Val1(UAC)	A	35	Ac-loop	UAC	3.40E-04	112366	0.0010816	3.66E-04	88964	0.00287304
EBT00051366399	Val1(UAC)	C	36	Ac-loop	UAC	0.00110261	112487	0.0176265	0.0014257	89220.3	0.0206903
EBT00051366399	Val1(UAC)	A	37	Ac-loop	UAC	2.68E-04	114506	0.0065791	3.65E-04	91105.3	0.00749149
EBT00051366399	Val1(UAC)	A	38	Ac-loop	UAC	1.99E-04	115264	0	1.88E-04	91793	0
EBT00051366399	Val1(UAC)	G	39	Ac-stem	UAC	0.00196751	115000	0.0125931	0.00101665	91694.7	0.0118399
EBT00051366399	Val1(UAC)	C	40	Ac-stem	UAC	4.94E-04	116466	0.0104394	5.54E-04	92793.3	0.0194262
EBT00051366399	Val1(UAC)	A	41	Ac-stem	UAC	2.06E-04	117695	0	1.71E-04	94631.7	0
EBT00051366399	Val1(UAC)	G	42	Ac-stem	UAC	0.00292473	117360	0.00905997	0.0016211	94442.3	0.00660912
EBT00051366399	Val1(UAC)	A	43	Ac-stem	UAC	2.38E-04	118433	1.69E-05	1.71E-04	95070.7	7.46E-04
EBT00051366399	Val1(UAC)	G	44	V-region	UAC	0.00239154	118435	0.00303323	0.00191939	95141.7	0.0019407
EBT00051366399	Val1(UAC)	G	45	V-region	UAC	0.00186611	118795	0.0051142	0.00101084	95326.7	0.00553255
EBT00051366399	Val1(UAC)	G	46	V-region	UAC	0.00599427	119406	0.0120931	0.00416186	95857	0.0117326
EBT00051366399	Val1(UAC)	T	47	V-region	UAC	2.64E-04	120868	0	2.10E-04	96995	2.82E-04
EBT00051366399	Val1(UAC)	C	48	V-region	UAC	6.76E-04	120862	0	0.0012336	97022.3	0
EBT00051366399	Val1(UAC)	G	49	T-stem	UAC	0.00294123	120854	0.00349063	0.0016474	96976	0.00405324
EBT00051366399	Val1(UAC)	G	50	T-stem	UAC	0.0012297	121277	0.00360676	7.26E-04	97370.7	0.00337426
EBT00051366399	Val1(UAC)	C	51	T-stem	UAC	8.62E-04	121716	8.51E-04	0.00201827	97700.3	0.00105654
EBT00051366399	Val1(UAC)	G	52	T-stem	UAC	0.00203309	121820	0.00112062	0.00148532	97803.7	0.002224
EBT00051366399	Val1(UAC)	G	53	T-stem	UAC	0.002321	121956	0.00713706	0.00143664	98021.7	0.00589234
EBT00051366399	Val1(UAC)	T	54	T-loop	UAC	2.27E-04	122833	0	2.10E-04	98602.7	0
EBT00051366399	Val1(UAC)	T	55	T-loop	UAC	4.27E-04	122735	0	3.52E-04	98494.7	0
EBT00051366399	Val1(UAC)	C	56	T-loop	UAC	4.53E-04	122563	0.00179178	7.12E-04	98327.7	0.00216154
EBT00051366399	Val1(UAC)	G	57	T-loop	UAC	0.00136088	122783	0.00278307	6.69E-04	98540.7	0.00241616
EBT00051366399	Val1(UAC)	A	58	T-loop	UAC	1.01E-04	123125	0	7.53E-05	98779.3	0
EBT00051366399	Val1(UAC)	T	59	T-loop	UAC	2.36E-04	122474	0	0.000242046	98356.3	0
EBT00051366399	Val1(UAC)	C	60	T-loop	UAC	5.77E-04	122449	0	8.80E-04	98216.7	0
EBT00051366399	Val1(UAC)	C	61	T-stem	UAC	7.04E-04	122030	0.00325088	0.00121073	97827.7	0.00380173
EBT00051366399	Val1(UAC)	C	62	T-stem	UAC	0.00206867	122428	0	0.0047659	98201	0
EBT00051366399	Val1(UAC)	G	63	T-stem	UAC	0.00604078	122213	0.00249758	0.0060145	98071	0.00250887
EBT00051366399	Val1(UAC)	T	64	T-stem	UAC	2.91E-04	122519	0.00194151	2.59E-04	98317.7	0.0015808
EBT00051366399	Val1(UAC)	C	65	T-stem	UAC	7.41E-04	122757	0.00447387	0.00140605	98473.3	0.00475355
EBT00051366399	Val1(UAC)	A	66	Acc-stem	UAC	2.00E-04	123309	0	1.04E-04	98943.7	0
EBT00051366399	Val1(UAC)	T	67	Acc-stem	UAC	3.04E-04	120962	0.0137279	2.50E-04	97399	0.0104476
EBT00051366399	Val1(UAC)	C	68	Acc-stem	UAC	5.75E-04	122646	3.94E-04	5.04E-04	98427.3	0
EBT00051366399	Val1(UAC)	A	69	Acc-stem	UAC	2.80E-04	122694	0	2.17E-04	98392.7	4.74E-04
EBT00051366399	Val1(UAC)	C	70	Acc-stem	UAC	5.64E-04	122676	0	6.45E-04	98439.3	0
EBT00051366399	Val1(UAC)	C	71	Acc-stem	UAC	4.35E-04	122508	0.00169768	5.03E-04	98260.7	0.00168654
EBT00051366399	Val1(UAC)	C	72	Acc-stem	UAC	5.65E-04	122716	0	6.34E-04	98426.7	0
EBT00051366399	Val1(UAC)	A	73	In between	UAC	5.87E-04	120437	0.0171537	4.64E-04	96483.7	0.0186106
EBT00051366399	Val1(UAC)	C	74	CCA	UAC	2.11E-05	122539	0	1.13E-05	98313.3	0
EBT00051366399	Val1(UAC)	C	75	CCA	UAC	0	119045	0	0	94322.3	0
EBT00051366399	Val1(UAC)	A	76	CCA	UAC	0	114762	0	0	89641.7	0
EBT00051366465	Ala1(GGC)	G	1	Acc-stem	GGC	0	71563.7	0.00771858	0	47706	0.0074484
EBT00051366465	Ala1(GGC)	G	2	Acc-stem	GGC	0	72120.3	0.00569393	0	48064	0.00763243
EBT00051366465	Ala1(GGC)	G	3	Acc-stem	GGC	0	72533.3	0.00385457	0	48433.7	0.00391439
EBT00051366465	Ala1(GGC)	G	4	Acc-stem	GGC	0.00166397	72814	0.011521	9.78E-04	48624	0.0138387
EBT00051366465	Ala1(GGC)	C	5	Acc-stem	GGC	7.21E-04	73662.7	0.0219996	8.15E-04	49306.3	0.0268487
EBT00051366465	Ala1(GGC)	T	6	Acc-stem	GGC	3.02E-04	75319.7	0.0162351	6.03E-04	50666.7	0.0299874
EBT00051366465	Ala1(GGC)	A	7	Acc-stem	GGC	1.97E-04	76562.7	0.0225419	1.19E-04	52233	0.0342424
EBT00051366465	Ala1(GGC)	T	8	In between	GGC	0.0341325	78328.3	0.0123485	0.023823	54085	0.015186
EBT00051366465	Ala1(GGC)	A	9	In between	GGC	9.49E-04	79307.7	0.0115906	0.00118631	54919	0.0176488
EBT00051366465	Ala1(GGC)	G	10	D-stem	GGC	0.00354429	80237.7	0.0112466	0.00359496	55905.7	0.0184009
EBT00051366465	Ala1(GGC)	C	11	D-stem	GGC	5.95E-04	81150.3	0.0326963	6.48E-04	56953.7	0.0406295
EBT00051366465	Ala1(GGC)	T	12	D-stem	GGC	1.95E-04	83893.3	0	2.22E-04	59365.7	0
EBT00051366465	Ala1(GGC)	C	13	D-stem	GGC	8.68E-04	83507	0.00597161	0.00137775	59189.3	0.00733453
EBT00051366465	Ala1(GGC)	A	14	D-loop	GGC	2.84E-04	84008.7	0.00518671	3.01E-04	59626.7	0.00682365
EBT00051366465	Ala1(GGC)	G	15	D-loop	GGC	0.00203642	84446.7	0.00716002	0.00134033	60036.3	0.0103031
EBT00051366465	Ala1(GGC)	C	16	D-loop	GGC	0.00125345	85055.7	0.0135004	7.39E-04	60661.3	0.0124271
EBT00051366465	Ala1(GGC)	T	17	D-loop	GGC	5.10E-04	86219.7	0.0017791	6.10E-04	61424.7	0.0019444
EBT00051366465	Ala1(GGC)	G	18	D-loop	GGC	7.72E-04	86373.3	0.00454088	5.72E-04	61544.3	0.00604557
EBT00051366465	Ala1(GGC)	G	19	D-loop	GGC	8.86E-04	86767.3	0.00343416	7.57E-04	61918.7	0.00398394
EBT00051366465	Ala1(GGC)	G	20	D-loop	GGC	0.00139501	87066.3	0.0134425	0.00130496	62166.3	0.0127
EBT00051366465	Ala1(GGC)	A	21	D-loop	GGC	1.66E-04	88252.7	9.74E-04	2.43E-04	62966	0.00150648
EBT00051366465	Ala1(GGC)	G	22	D-stem	GGC	0.00157406	88338.7	0	6.58E-04	63061	0
EBT00051366465	Ala1(GGC)	A	23	D-stem	GGC	2.67E-04	86189.3	0.0345276	2.53E-04	61173.7	0.0396398
EBT00051366465	Ala1(GGC)	G	24	D-stem	GGC	0.00217267	89271.7	0.00721011	0.00108996	63698.7	0.00487937
EBT00051366465	Ala1(GGC)	C	25	D-stem	GGC	0.00170279	89920	0.00520703	0.00426898	64011	0.00526806
EBT00051366465	Ala1(GGC)	G	26	In between	GGC	0.00499914	90390.7	0.0158525	0.00252069	64350	0.0166364
EBT00051366465	Ala1(GGC)	C	27	Ac-stem	GGC	0.00107544	91846.7	0.0112816	0.00225995	65438.7	0.0128177
EBT00051366465	Ala1(GGC)	T	28	Ac-stem	GGC	5.40E-05	92894.7	0	7.69E-05	66288.3	0
EBT00051366465	Ala1(GGC)	T	29	Ac-stem	GGC	2.73E-04	92656.7	0.00555234	3.73E-04	66167.7	0.00515208
EBT00051366465	Ala1(GGC)	G	30	Ac-stem	GGC	4.26E-04	93174	0.00253006	3.76E-04	66510.3	0.00319229
EBT00051366465	Ala1(GGC)	C	31	Ac-stem	GGC	3.97E-04	93410.3	0	3.88E-04	66723.3	0
EBT00051366465	Ala1(GGC)	A	32	Ac-loop	GGC	1.67E-04	93306	0.017135	1.90E-04	66622.3	0.0232141
EBT00051366465	Ala1(GGC)	T	33	Ac-loop	GGC	2.81E-04	94932.7	0	3.73E-04	68205.7	0
EBT00051366465	Ala1(GGC)	G	34	Ac-loop	GGC	0.00174085	94539	0.00757571	9.75E-04	68026	0.0078708
EBT00051366465	Ala1(GGC)	G	35	Ac-loop	GGC	0.00132611	95260.7	0.0457616	9.73E-04	68565.7	0.0547664
EBT00051366465	Ala1(GGC)	C	36	Ac-loop	GGC	0.00122113	99829	0.0733322	0.00209346	72538.3	0.103543
EBT00051366465	Ala1(GGC)	A	37	Ac-loop	GGC	1.58E-04	107729	0.0123613	2.65E-04	80916.7	0.0168044
EBT00051366465	Ala1(GGC)	T	38	Ac-loop	GGC	1.21E-04	109077	0.00164444	1.69E-04	82299.7	0.00215009
EBT00051366465	Ala1(GGC)	G	39	Ac-stem	GGC	4.74E-04	109257	0.00347204	4.19E-04	82477	0.0036242
EBT00051366465	Ala1(GGC)	C	40	Ac-stem	GGC	4.69E-04	109638	0.00458496	4.07E-04	82777	0.00564187
EBT00051366465	Ala1(GGC)	A	41	Ac-stem	GGC	5.04E-04	110143	0.00708265	4.50E-04	83246.7	0.00858664
EBT00051366465	Ala1(GGC)	A	42	Ac-stem	GGC	1.43E-04	110928	0	1.57E-04	83967.7	0
EBT00051366465	Ala1(GGC)	G	43	Ac-stem	GGC	0.00371603	110722	0	0.00185808	83864.3	0
EBT00051366465	Ala1(GGC)	A	44	V-region	GGC	1.53E-04	107349	0.0429454	2.40E-04	81604.7	0.0383763
EBT00051366465	Ala1(GGC)	G	45	V-region	GGC	0.00261865	112166	0.00444969	0.00152995	84861.3	0.00380737
EBT00051366465	Ala1(GGC)	G	46	V-region	GGC	0.00579986	112667	0.00790737	0.00329624	85185.7	0.0112472
EBT00051366465	Ala1(GGC)	T	47	V-region	GGC	2.68E-04	113565	0.00675776	2.19E-04	86154.7	0.00480532
EBT00051366465	Ala1(GGC)	C	48	V-region	GGC	6.43E-04	114338	0.00109788	0.00120935	86570.7	0.00176806
EBT00051366465	Ala1(GGC)	G	49	T-stem	GGC	0.00466949	114463	0.00857489	0.00268443	86724	0.0085173
EBT00051366465	Ala1(GGC)	A	50	T-stem	GGC	2.24E-04	115453	0.00776633	2.75E-04	87469	0.00810055
EBT00051366465	Ala1(GGC)	C	51	T-stem	GGC	4.56E-04	116357	0	7.88E-04	88183.3	0
EBT00051366465	Ala1(GGC)	G	52	T-stem	GGC	0.00179552	116279	0.00187129	9.64E-04	88145.3	0.00210194
EBT00051366465	Ala1(GGC)	G	53	T-stem	GGC	0.00153111	116497	0.00580034	7.49E-04	88331	0.00578909
EBT00051366465	Ala1(GGC)	T	54	T-loop	GGC	2.45E-04	117177	6.82E-04	2.42E-04	88845.3	9.90E-04
EBT00051366465	Ala1(GGC)	T	55	T-loop	GGC	4.16E-04	117257	0	3.73E-04	88933.3	0
EBT00051366465	Ala1(GGC)	C	56	T-loop	GGC	5.69E-04	116996	0.00150774	8.80E-04	88651	0.00212742
EBT00051366465	Ala1(GGC)	G	57	T-loop	GGC	0.00220956	117173	0.00284804	8.42E-04	88840	0.00286211
EBT00051366465	Ala1(GGC)	A	58	T-loop	GGC	6.35E-05	117508	0	4.85E-05	89095	0
EBT00051366465	Ala1(GGC)	T	59	T-loop	GGC	2.62E-04	117307	0	1.64E-04	88972.3	0
EBT00051366465	Ala1(GGC)	C	60	T-loop	GGC	5.97E-04	116928	0	0.001023	88596.7	0
EBT00051366465	Ala1(GGC)	C	61	T-stem	GGC	5.78E-04	116556	0.00352802	0.00117821	88308	0.00347942
EBT00051366465	Ala1(GGC)	C	62	T-stem	GGC	0.00161571	116968	3.28E-04	0.00374055	88616.3	9.21E-04
EBT00051366465	Ala1(GGC)	G	63	T-stem	GGC	6.50E-04	117007	0	4.64E-04	88698	0
EBT00051366465	Ala1(GGC)	T	64	T-stem	GGC	3.07E-04	116912	0.00240058	3.07E-04	88678.7	0.00197328
EBT00051366465	Ala1(GGC)	C	65	T-stem	GGC	5.12E-04	117194	0	5.35E-04	88854	0
EBT00051366465	Ala1(GGC)	T	66	Acc-stem	GGC	1.90E-04	116272	0.0107738	1.82E-04	88436	0.00722946
EBT00051366465	Ala1(GGC)	A	67	Acc-stem	GGC	1.61E-04	117538	0	2.04E-04	89080	0
EBT00051366465	Ala1(GGC)	G	68	Acc-stem	GGC	0.00107177	116863	0	7.47E-04	88618.3	0
EBT00051366465	Ala1(GGC)	C	69	Acc-stem	GGC	0.00102817	116839	0	0.00192864	88591.3	0
EBT00051366465	Ala1(GGC)	T	70	Acc-stem	GGC	4.25E-04	115654	0.0117605	3.58E-04	87875.3	0.00900677
EBT00051366465	Ala1(GGC)	C	71	Acc-stem	GGC	6.56E-04	117030	0	8.32E-04	88674	1.88E-05
EBT00051366465	Ala1(GGC)	C	72	Acc-stem	GGC	6.43E-04	116969	0.00578554	9.07E-04	88675.7	0.00568868
EBT00051366465	Ala1(GGC)	A	73	In between	GGC	4.86E-04	117650	0	5.82E-04	89183	0
EBT00051366465	Ala1(GGC)	C	74	CCA	GGC	5.95E-05	117165	0	4.76E-05	88810	0
EBT00051366465	Ala1(GGC)	C	75	CCA	GGC	0	115521	0	0	87451.3	0
EBT00051366465	Ala1(GGC)	A	76	CCA	GGC	0	110685	0	0	82842	0
EBT00051366536	Ser1(GCU)	G	1	Acc-stem	GCU	0	23889.7	0.0067768	0	16206.7	0.00655892
EBT00051366536	Ser1(GCU)	G	2	Acc-stem	GCU	0	24052.7	0.00574578	0	16313.7	0.00540574
EBT00051366536	Ser1(GCU)	A	3	Acc-stem	GCU	0	24191.7	0.00200767	0	16402.3	0.0042294
EBT00051366536	Ser1(GCU)	G	4	Acc-stem	GCU	2.72E-04	24240.3	0	3.60E-04	16472	0
EBT00051366536	Ser1(GCU)	A	5	Acc-stem	GCU	2.15E-04	23147.3	0.050067	3.24E-04	15702	0.0515061
EBT00051366536	Ser1(GCU)	G	6	Acc-stem	GCU	4.99E-04	24367.3	0.00257876	4.41E-04	16554.7	0.00335133
EBT00051366536	Ser1(GCU)	G	7	Acc-stem	GCU	0.00359801	24430.3	0	0.00489024	16610.3	0
EBT00051366536	Ser1(GCU)	T	8	In between	GCU	0.0530801	24103.7	0.0233522	0.0534655	16513	0.0202326
EBT00051366536	Ser1(GCU)	G	9	In between	GCU	0.00127428	24680	0.00186039	6.57E-04	16854	0.00193447
EBT00051366536	Ser1(GCU)	G	10	D-stem	GCU	0.00199962	24726	0	4.96E-04	16886.7	0
EBT00051366536	Ser1(GCU)	C	11	D-stem	GCU	9.09E-04	24363.7	0.0195313	0.00157212	16700.3	0.0166634
EBT00051366536	Ser1(GCU)	C	12	D-stem	GCU	7.48E-04	24849	0.0067022	0.00148046	16983.3	0.00455229
EBT00051366536	Ser1(GCU)	G	13	D-stem	GCU	0.00346548	25016.7	0.0115896	0.00124519	17061	0.00879214
EBT00051366536	Ser1(GCU)	A	14	D-loop	GCU	4.20E-04	25310	0.00115762	2.45E-04	17212.3	6.00E-04
EBT00051366536	Ser1(GCU)	G	15	D-loop	GCU	0.00689995	25339.3	0.0102983	0.00451569	17222.7	0.00945151
EBT00051366536	Ser1(GCU)	T	16	D-loop	GCU	6.41E-04	25603	0.0039681	4.14E-04	17387	0.0022762
EBT00051366536	Ser1(GCU)	G	18	D-loop	GCU	0.00131883	25705	0.00356631	9.56E-04	17426.7	0.00190913
EBT00051366536	Ser1(GCU)	G	19	D-loop	GCU	5.14E-04	25797	0.00460456	3.89E-04	17460	0.00493921
EBT00051366536	Ser1(GCU)	C	20	D-loop	GCU	8.87E-04	25916.3	0.00210491	0.00176825	17546.7	0.00229336
EBT00051366536	Ser1(GCU)	C	20a	D-loop	GCU	5.04E-04	25971	0.0065412	7.61E-04	17587	0.00447187
EBT00051366536	Ser1(GCU)	G	20b	D-loop	GCU	0.00480268	26142	0.0269968	0.00253511	17666	0.0234564
EBT00051366536	Ser1(GCU)	A	21	D-loop	GCU	2.85E-04	26867.3	0.00553972	3.71E-04	18090.3	0.00412874
EBT00051366536	Ser1(GCU)	A	22	D-stem	GCU	1.10E-04	27017	0.00184727	2.37E-04	18165.3	0.00312803
EBT00051366536	Ser1(GCU)	G	23	D-stem	GCU	0.00765025	27067	0.0172345	0.00463839	18222.3	0.0163029
EBT00051366536	Ser1(GCU)	G	24	D-stem	GCU	0.00907818	27541.7	0.0182157	0.00661058	18524.3	0.0147679
EBT00051366536	Ser1(GCU)	C	25	D-stem	GCU	0.0013848	28052.7	0.00307991	0.00231163	18802	0.00316338
EBT00051366536	Ser1(GCU)	G	26	In between	GCU	0.0135898	28139.3	0.01982	0.00353512	18861.7	0.00553603
EBT00051366536	Ser1(GCU)	C	27	Ac-stem	GCU	6.83E-04	28708.3	0.00601297	8.79E-04	18966.7	0.00491422
EBT00051366536	Ser1(GCU)	T	28	Ac-stem	GCU	5.96E-04	28882	0	4.30E-04	19060.3	0
EBT00051366536	Ser1(GCU)	C	29	Ac-stem	GCU	6.63E-04	28842.3	0.00289244	7.72E-04	19026	0.00375264
EBT00051366536	Ser1(GCU)	C	30	Ac-stem	GCU	7.97E-04	28926	0.00352529	7.85E-04	19097.7	0.00339201
EBT00051366536	Ser1(GCU)	C	31	Ac-stem	GCU	3.25E-04	29028.3	0.00224562	8.36E-04	19162.7	0.00284465
EBT00051366536	Ser1(GCU)	C	32	Ac-loop	GCU	0.00791802	29093.7	0.0135957	0.00640707	19217.3	0.0108774
EBT00051366536	Ser1(GCU)	T	33	Ac-loop	GCU	2.09E-04	29494.7	0	2.40E-04	19428.7	3.43E-05
EBT00051366536	Ser1(GCU)	G	34	Ac-loop	GCU	0.00223198	29464	0.0192724	0.0010503	19429.3	0.0141231
EBT00051366536	Ser1(GCU)	C	35	Ac-loop	GCU	6.95E-04	30043	0.0142295	7.08E-04	19707.7	0.0149778
EBT00051366536	Ser1(GCU)	T	36	Ac-loop	GCU	2.98E-04	30476.7	0	2.82E-04	20007.3	0
EBT00051366536	Ser1(GCU)	A	37	Ac-loop	GCU	9.37E-04	30464	0.0152043	0.00126114	20002.7	0.0168747
EBT00051366536	Ser1(GCU)	A	38	Ac-loop	GCU	2.54E-04	30934.3	0.0179369	2.89E-04	20346	0.0175286
EBT00051366536	Ser1(GCU)	G	39	Ac-stem	GCU	0.00423116	31499.3	0.00720709	0.00234971	20709	0.00545879
EBT00051366536	Ser1(GCU)	G	40	Ac-stem	GCU	4.72E-04	31728	0.0038096	3.49E-04	20822.7	0.00489048
EBT00051366536	Ser1(GCU)	G	41	Ac-stem	GCU	8.17E-04	31849.3	0.00869421	4.61E-04	20925	0.00718025
EBT00051366536	Ser1(GCU)	A	42	Ac-stem	GCU	3.73E-04	32128.7	0.00177097	1.53E-04	21076.3	8.69E-04
EBT00051366536	Ser1(GCU)	G	43	Ac-stem	GCU	0.00419032	32185.7	0.0154077	9.00E-04	21094.7	0.0112956
EBT00051366536	Ser1(GCU)	T	44	V-region	GCU	2.80E-04	32689.3	0.00284703	2.80E-04	21335.7	0.00271108
EBT00051366536	Ser1(GCU)	A	V1	V-region	GCU	1.91E-04	32782.7	8.94E-04	2.31E-04	21393.7	8.10E-04
EBT00051366536	Ser1(GCU)	C	V2	V-region	GCU	0.00107768	32812	0.0183102	0.00163904	21411	0.0176638
EBT00051366536	Ser1(GCU)	A	V3	V-region	GCU	1.80E-04	33424	1.30E-04	3.33E-04	21796	0
EBT00051366536	Ser1(GCU)	C	V4	V-region	GCU	5.60E-04	33428.3	0	4.56E-04	21783.3	0
EBT00051366536	Ser1(GCU)	C	V5	V-region	GCU	5.14E-04	33330.7	0.0155264	6.64E-04	21718.7	0.0163499
EBT00051366536	Ser1(GCU)	T	V6	V-region	GCU	4.13E-04	33856.3	0.00139611	1.97E-04	22079.7	0.00231952
EBT00051366536	Ser1(GCU)	C	V8	V-region	GCU	5.89E-04	33903.7	0	8.16E-04	22131	0
EBT00051366536	Ser1(GCU)	A	V9	V-region	GCU	2.71E-04	33337.3	0.0308257	2.54E-04	21838	0.0335743
EBT00051366536	Ser1(GCU)	A	V10	V-region	GCU	1.80E-04	34397.7	0	2.36E-04	22596.7	0
EBT00051366536	Ser1(GCU)	A	V11	V-region	GCU	1.26E-04	32056.7	0.0776033	1.61E-04	20955.7	0.082903
EBT00051366536	Ser1(GCU)	A	V12	V-region	GCU	7.59E-05	34753.7	0	2.14E-04	22850	0
EBT00051366536	Ser1(GCU)	G	V14	V-region	GCU	0.00134233	34513.3	2.41E-04	9.51E-04	22689	0
EBT00051366536	Ser1(GCU)	G	V15	V-region	GCU	8.60E-04	34521.7	0.00578873	4.11E-04	22665.3	0.00602269
EBT00051366536	Ser1(GCU)	G	V16	V-region	GCU	0.00109262	34722.7	0.00347265	6.46E-04	22802.7	0.00320569
EBT00051366536	Ser1(GCU)	T	V17	V-region	GCU	2.47E-04	34843.7	0.00375506	4.20E-05	22876	0.00520388
EBT00051366536	Ser1(GCU)	G	V18	V-region	GCU	0.0055132	34975	4.00E-04	0.00299942	22995.7	0
EBT00051366536	Ser1(GCU)	T	V19	V-region	GCU	2.19E-04	34989	0.0110608	5.03E-04	22909.7	0.00921174
EBT00051366536	Ser1(GCU)	C	48	V-region	GCU	0.00965329	35380.3	8.19E-04	0.0344149	23122.7	0.0038915
EBT00051366536	Ser1(GCU)	G	49	T-stem	GCU	0.0046109	35409.3	0.0016916	0.00266886	23213	7.75E-04
EBT00051366536	Ser1(GCU)	G	50	T-stem	GCU	0.00261997	35469.3	0.0022691	9.50E-04	23231	0.0022191
EBT00051366536	Ser1(GCU)	G	51	T-stem	GCU	0.00168179	35550	4.03E-04	4.68E-04	23282.7	0
EBT00051366536	Ser1(GCU)	G	52	T-stem	GCU	0.00127614	35564.3	2.34E-04	7.81E-04	23279.7	2.15E-04
EBT00051366536	Ser1(GCU)	G	53	T-stem	GCU	0.00115763	35572.7	0	1.65E-04	23284.7	0
EBT00051366536	Ser1(GCU)	T	54	T-loop	GCU	1.29E-04	35529	0.002312	2.60E-04	23218.3	0.00321981
EBT00051366536	Ser1(GCU)	T	55	T-loop	GCU	3.29E-04	35611.3	5.62E-05	2.58E-04	23293.3	0
EBT00051366536	Ser1(GCU)	C	56	T-loop	GCU	4.58E-04	35613.3	3.09E-04	9.42E-04	23286.3	7.15E-04
EBT00051366536	Ser1(GCU)	G	57	T-loop	GCU	0.0046426	35624.3	0.00539771	0.00263073	23303	0.00520811
EBT00051366536	Ser1(GCU)	A	58	T-loop	GCU	4.27E-04	35817.7	0	2.72E-04	23425	0
EBT00051366536	Ser1(GCU)	A	59	T-loop	GCU	1.78E-04	35711.3	0	1.60E-04	23338.7	0
EBT00051366536	Ser1(GCU)	T	60	T-loop	GCU	2.06E-04	35271.3	0.00624536	1.96E-04	23111.3	0.00387909
EBT00051366536	Ser1(GCU)	C	61	T-stem	GCU	4.64E-04	35493	0	6.65E-04	23201.3	0
EBT00051366536	Ser1(GCU)	C	62	T-stem	GCU	5.58E-04	35183	0	0.000632212	23037.3	0
EBT00051366536	Ser1(GCU)	C	63	T-stem	GCU	8.65E-04	35102.3	0	0.00169048	22939.3	0
EBT00051366536	Ser1(GCU)	C	64	T-stem	GCU	0.00357444	34776.7	0.0158383	0.0052136	22720.3	0.0146442
EBT00051366536	Ser1(GCU)	C	65	T-stem	GCU	0.00891328	35336.3	0.00928946	0.0076244	23058	0.0105137
EBT00051366536	Ser1(GCU)	C	66	Acc-stem	GCU	9.01E-04	35667.7	0	0.00128215	23303	1.43E-04
EBT00051366536	Ser1(GCU)	C	67	Acc-stem	GCU	0.00122298	35652	0	0.00296661	23306.3	0
EBT00051366536	Ser1(GCU)	T	68	Acc-stem	GCU	2.49E-04	31511.7	0.11333	1.76E-04	20255.7	0.127913
EBT00051366536	Ser1(GCU)	C	69	Acc-stem	GCU	9.62E-04	35539.3	0	0.00234578	23226.7	0
EBT00051366536	Ser1(GCU)	T	70	Acc-stem	GCU	3.03E-04	33873	0.0404702	2.53E-04	22378.7	0.0305831
EBT00051366536	Ser1(GCU)	C	71	Acc-stem	GCU	1.97E-04	35301.7	0	4.86E-04	23084.7	0
EBT00051366536	Ser1(GCU)	C	72	Acc-stem	GCU	3.96E-04	35301	0	6.03E-04	23033.3	0
EBT00051366536	Ser1(GCU)	G	73	In between	GCU	0.00522997	34768.3	0.0273413	0.00601804	22654	0.0306237
EBT00051366536	Ser1(GCU)	C	74	CCA	GCU	8.88E-06	35745.7	0	1.11E-05	23369.7	0
EBT00051366536	Ser1(GCU)	C	75	CCA	GCU	0	33827.7	0	0	21807.7	0
EBT00051366536	Ser1(GCU)	A	76	CCA	GCU	0	31297	0	0	19522.7	0
EBT00051366603	Arg1(CCU)	G	1	Acc-stem	CCU	0	3790	0.0196586	0	3447.67	0.0177588
EBT00051366603	Arg1(CCU)	T	2	Acc-stem	CCU	0	3866	0.00514668	0	3510	0.00856793
EBT00051366603	Arg1(CCU)	C	3	Acc-stem	CCU	0	3886	0	0	3540.33	0
EBT00051366603	Arg1(CCU)	C	4	Acc-stem	CCU	9.49E-04	3880.67	0.00724823	8.40E-04	3530	0.00526019
EBT00051366603	Arg1(CCU)	C	5	Acc-stem	CCU	9.95E-04	3909	0	0.00331064	3548.67	2.82E-04
EBT00051366603	Arg1(CCU)	G	6	Acc-stem	CCU	0.0010131	3908.67	0.00475301	2.42E-04	3549.67	0.00336921
EBT00051366603	Arg1(CCU)	G	7	Acc-stem	CCU	0.00116348	3927.33	0.0137284	0.00111312	3561.67	0.0155703
EBT00051366603	Arg1(CCU)	T	8	In between	CCU	7.67E-05	3982	0.00308771	0	3618	0.0031227
EBT00051366603	Arg1(CCU)	A	9	In between	CCU	2.45E-04	3994.33	0.0023312	4.65E-04	3629.33	0
EBT00051366603	Arg1(CCU)	G	10	D-stem	CCU	0.00281458	4003.67	0.00940206	6.92E-04	3626.67	0.00421014
EBT00051366603	Arg1(CCU)	C	11	D-stem	CCU	3.25E-04	4041.67	0.0228079	0.00142972	3642	0.0342084
EBT00051366603	Arg1(CCU)	T	12	D-stem	CCU	3.34E-04	4136	0	2.28E-04	3771	8.83E-04
EBT00051366603	Arg1(CCU)	C	13	D-stem	CCU	6.24E-04	4126	0	5.64E-04	3774.33	0.00246674
EBT00051366603	Arg1(CCU)	A	14	D-loop	CCU	6.94E-04	4113.33	0.0139832	5.68E-04	3783.67	0.0134712
EBT00051366603	Arg1(CCU)	A	15	D-loop	CCU	1.51E-04	4171.67	0.0251597	8.71E-05	3835.33	0.0255759
EBT00051366603	Arg1(CCU)	T	16	D-loop	CCU	7.67E-05	4279.33	0	2.55E-04	3936	0
EBT00051366603	Arg1(CCU)	T	17	D-loop	CCU	5.51E-04	4250.67	0.0095534	0.00100715	3910.33	0.011127
EBT00051366603	Arg1(CCU)	G	18	D-loop	CCU	0.00263562	4291.67	0.00961539	7.13E-04	3954.33	0.0033605
EBT00051366603	Arg1(CCU)	G	19	D-loop	CCU	8.05E-04	4333.33	0.0123082	6.50E-04	3967.67	0.012527
EBT00051366603	Arg1(CCU)	A	20	D-loop	CCU	2.24E-04	4387.33	0.0136391	8.29E-05	4018	0.0135036
EBT00051366603	Arg1(CCU)	T	20a	D-loop	CCU	4.85E-04	4448	0	3.69E-04	4073	0
EBT00051366603	Arg1(CCU)	A	21	D-loop	CCU	1.41E-04	4315.33	0.0322195	6.62E-05	3957	0.0324395
EBT00051366603	Arg1(CCU)	G	22	D-stem	CCU	9.08E-04	4459	0	9.47E-04	4089.67	0
EBT00051366603	Arg1(CCU)	A	23	D-stem	CCU	6.29E-04	4401.33	0.0190193	3.94E-04	4056	0.0125781
EBT00051366603	Arg1(CCU)	G	24	D-stem	CCU	2.93E-04	4486.67	0.00244571	2.91E-04	4107.67	0.00218623
EBT00051366603	Arg1(CCU)	C	25	D-stem	CCU	9.34E-04	4497.67	0.0165452	4.12E-04	4116.67	0.0168763
EBT00051366603	Arg1(CCU)	A	26	In between	CCU	3.70E-04	4573.33	0.00363108	3.93E-04	4187.33	0
EBT00051366603	Arg1(CCU)	T	27	Ac-stem	CCU	0	4590	0	1.08E-04	4187	0
EBT00051366603	Arg1(CCU)	C	28	Ac-stem	CCU	9.29E-04	4567.33	0.00240262	0.0013698	4181.33	0
EBT00051366603	Arg1(CCU)	C	29	Ac-stem	CCU	0.00152263	4578.33	0.0063662	0.00218764	4179	0.00673427
EBT00051366603	Arg1(CCU)	C	30	Ac-stem	CCU	0.00215262	4607.67	0	0.004419	4207.33	0
EBT00051366603	Arg1(CCU)	C	31	Ac-stem	CCU	6.71E-04	4583.67	0.00239408	9.54E-04	4186.67	0
EBT00051366603	Arg1(CCU)	C	32	Ac-loop	CCU	0.00474436	4594.67	0.0220646	0.0030983	4179	0.0183228
EBT00051366603	Arg1(CCU)	T	33	Ac-loop	CCU	4.20E-04	4698.33	0.0125403	2.80E-04	4257	0.0151912
EBT00051366603	Arg1(CCU)	C	34	Ac-loop	CCU	8.40E-04	4758	0	4.42E-04	4322.67	0
EBT00051366603	Arg1(CCU)	C	35	Ac-loop	CCU	4.91E-04	4734.67	0	6.71E-04	4295.67	0
EBT00051366603	Arg1(CCU)	T	36	Ac-loop	CCU	1.34E-04	4724	5.64E-04	0	4281.67	0.00186495
EBT00051366603	Arg1(CCU)	A	37	Ac-loop	CCU	0.00115188	4726.67	0.0144565	0.00174707	4289.67	0.0090097
EBT00051366603	Arg1(CCU)	A	38	Ac-loop	CCU	4.70E-04	4796	0.0625489	7.00E-04	4328.67	0.0637347
EBT00051366603	Arg1(CCU)	G	39	Ac-stem	CCU	0.00289295	5116	0.0033119	0.00217539	4623.33	0.00165551
EBT00051366603	Arg1(CCU)	G	40	Ac-stem	CCU	3.16E-04	5133	0.00317193	0	4631	0.00380037
EBT00051366603	Arg1(CCU)	G	41	Ac-stem	CCU	1.96E-04	5149.33	0.0039332	3.13E-04	4648.67	0.00236068
EBT00051366603	Arg1(CCU)	G	42	Ac-stem	CCU	4.49E-04	5169.67	0.00218748	2.41E-04	4659.67	0.00370608
EBT00051366603	Arg1(CCU)	A	43	Ac-stem	CCU	3.22E-04	5181	0.00486587	1.69E-04	4677	0.00298444
EBT00051366603	Arg1(CCU)	A	44	V-region	CCU	0	5206.33	0.00357257	2.39E-04	4691	0.00332861
EBT00051366603	Arg1(CCU)	G	45	V-region	CCU	0.00142975	5225	0.00317965	6.56E-04	4706.67	0.00212014
EBT00051366603	Arg1(CCU)	G	46	V-region	CCU	0.00702066	5241.67	0.0179241	0.00454555	4716.67	0.00401211
EBT00051366603	Arg1(CCU)	T	47	V-region	CCU	0.00399284	5337.33	0.00552761	6.99E-05	4735.67	0
EBT00051366603	Arg1(CCU)	T	48	V-region	CCU	3.66E-04	5367	0.00947401	3.51E-04	4689.67	0.0132557
EBT00051366603	Arg1(CCU)	G	49	T-stem	CCU	0.0019279	5418.33	0	0.00116703	4752.67	0
EBT00051366603	Arg1(CCU)	G	50	T-stem	CCU	0.0010172	5416	0.00793748	7.61E-04	4751.67	0.00883048
EBT00051366603	Arg1(CCU)	A	51	T-stem	CCU	1.19E-04	5459.33	0	3.56E-04	4794	0
EBT00051366603	Arg1(CCU)	G	52	T-stem	CCU	5.84E-04	5457.33	0	5.09E-04	4786.67	0
EBT00051366603	Arg1(CCU)	G	53	T-stem	CCU	8.08E-04	5449	0.00553595	3.04E-04	4777.33	0.00534388
EBT00051366603	Arg1(CCU)	T	54	T-loop	CCU	3.74E-04	5479.33	0	2.46E-04	4803	0
EBT00051366603	Arg1(CCU)	T	55	T-loop	CCU	1.18E-04	5479.33	0	5.37E-04	4798.33	0
EBT00051366603	Arg1(CCU)	C	56	T-loop	CCU	0.00126385	5479	0	0.00136378	4784.33	0.00166933
EBT00051366603	Arg1(CCU)	G	57	T-loop	CCU	0.00249349	5471.33	0	0.00146083	4792.33	0
EBT00051366603	Arg1(CCU)	A	58	T-loop	CCU	1.19E-04	5440.33	0	1.92E-04	4770.67	0
EBT00051366603	Arg1(CCU)	C	59	T-loop	CCU	7.95E-04	5393.67	0.0135341	0.00133506	4718.67	0.0133817
EBT00051366603	Arg1(CCU)	C	60	T-loop	CCU	3.59E-04	5467.67	0	7.16E-04	4782.67	0
EBT00051366603	Arg1(CCU)	C	61	T-stem	CCU	6.20E-04	5283	0.0328309	7.18E-04	4593.33	0.040724
EBT00051366603	Arg1(CCU)	C	62	T-stem	CCU	4.90E-04	5462.33	0.00140158	4.95E-04	4788.33	0
EBT00051366603	Arg1(CCU)	T	63	T-stem	CCU	2.34E-04	5470	0	4.54E-04	4784.67	9.05E-04
EBT00051366603	Arg1(CCU)	C	64	T-stem	CCU	6.12E-04	5469.67	7.31E-04	9.35E-04	4789	0
EBT00051366603	Arg1(CCU)	T	65	T-stem	CCU	1.72E-04	5473.67	0	4.11E-04	4788.33	1.39E-04
EBT00051366603	Arg1(CCU)	C	66	Acc-stem	CCU	5.43E-04	5470	0	3.72E-04	4789	0
EBT00051366603	Arg1(CCU)	C	67	Acc-stem	CCU	5.66E-04	5459	0	6.21E-04	4768	0
EBT00051366603	Arg1(CCU)	G	68	Acc-stem	CCU	0.00119911	5417	0.00471583	6.40E-04	4745	0.00175316
EBT00051366603	Arg1(CCU)	G	69	Acc-stem	CCU	9.49E-04	5442.67	9.18E-04	3.87E-04	4753.33	0.00209937
EBT00051366603	Arg1(CCU)	G	70	Acc-stem	CCU	0.00134654	5447.67	0	6.22E-04	4763.33	0.00160693
EBT00051366603	Arg1(CCU)	A	71	Acc-stem	CCU	1.26E-04	5433.67	0.00935886	2.06E-04	4771	0.00714484
EBT00051366603	Arg1(CCU)	C	72	Acc-stem	CCU	0.00132916	5485	0	6.31E-04	4805.33	0
EBT00051366603	Arg1(CCU)	G	73	In between	CCU	0.00193773	5445.33	0.00511571	0.00137061	4756.67	0.0066133
EBT00051366603	Arg1(CCU)	C	74	CCA	CCU	5.63E-05	5473.33	0	0	4788.33	0
EBT00051366603	Arg1(CCU)	C	75	CCA	CCU	0	5252.33	0	0	4583.33	0
EBT00051366603	Arg1(CCU)	A	76	CCA	CCU	0	4885.33	0.878032	0	4157.67	0.947741
EBT00051366843	Arg1(ACG)	G	1	Acc-stem	ACG	0	40054.3	0.0154609	0	79558.3	0.0104562
EBT00051366843	Arg1(ACG)	C	2	Acc-stem	ACG	0	40683.3	0.00845716	0	80399	0.00769335
EBT00051366843	Arg1(ACG)	A	3	Acc-stem	ACG	0	41030.3	0	0	81022.3	0
EBT00051366843	Arg1(ACG)	C	4	Acc-stem	ACG	7.76E-04	31378	0.257191	9.93E-04	55051.7	0.341779
EBT00051366843	Arg1(ACG)	T	5	Acc-stem	ACG	2.27E-04	42242.3	0.0086364	2.50E-04	83637	0.00691448
EBT00051366843	Arg1(ACG)	C	6	Acc-stem	ACG	0.00139974	42610.3	0.0157306	0.00142041	84219.3	0.0181709
EBT00051366843	Arg1(ACG)	A	7	Acc-stem	ACG	7.10E-04	43291.3	0.0427072	2.46E-04	85778	0.0392715
EBT00051366843	Arg1(ACG)	T	8	In between	ACG	0.0418195	45222.7	0.013969	0.0384092	89284.3	0.00835953
EBT00051366843	Arg1(ACG)	A	9	In between	ACG	3.98E-04	45863.3	0.0127222	4.36E-04	90037	0.015591
EBT00051366843	Arg1(ACG)	G	10	D-stem	ACG	0.00476027	46454.3	0	0.00368332	91463	0
EBT00051366843	Arg1(ACG)	C	11	D-stem	ACG	8.33E-04	45967.3	0.0607858	9.51E-04	89044.7	0.0800696
EBT00051366843	Arg1(ACG)	T	12	D-stem	ACG	1.79E-04	48942.3	0	2.19E-04	96795	0
EBT00051366843	Arg1(ACG)	C	13	D-stem	ACG	0.00113758	48393.3	0	0.00155897	95711	0
EBT00051366843	Arg1(ACG)	A	14	D-loop	ACG	4.87E-04	48117.3	0.0274873	3.16E-04	95312	0.033105
EBT00051366843	Arg1(ACG)	G	15	D-loop	ACG	0.0037479	49477.3	0.0127635	0.00167601	98575.3	0.01401
EBT00051366843	Arg1(ACG)	C	16	D-loop	ACG	0.00301403	50117	0.00349949	0.00143401	99976	1.03E-04
EBT00051366843	Arg1(ACG)	T	17	D-loop	ACG	7.08E-04	50293	0.0119512	7.83E-04	99986.3	0.017742
EBT00051366843	Arg1(ACG)	G	18	D-loop	ACG	0.00184681	50901.3	0.00761007	0.00141101	101792	0.00923357
EBT00051366843	Arg1(ACG)	G	19	D-loop	ACG	0.00219485	51291.7	0.0103483	0.00143331	102741	0.0141848
EBT00051366843	Arg1(ACG)	A	20	D-loop	ACG	3.91E-04	51828	0.01746	4.88E-04	104219	0.0255413
EBT00051366843	Arg1(ACG)	T	20a	D-loop	ACG	7.48E-04	52749	0	5.97E-04	106951	0
EBT00051366843	Arg1(ACG)	A	21	D-loop	ACG	2.12E-04	50027	0.0615773	1.73E-04	102387	0.0622353
EBT00051366843	Arg1(ACG)	G	22	D-stem	ACG	0.00215731	53309.7	0	0.00132239	109182	0
EBT00051366843	Arg1(ACG)	A	23	D-stem	ACG	3.19E-04	52596.7	0.0215302	2.78E-04	107929	0.023208
EBT00051366843	Arg1(ACG)	G	24	D-stem	ACG	0.00289213	53754	0.0112631	0.00170343	110494	0.0238271
EBT00051366843	Arg1(ACG)	T	25	D-stem	ACG	3.23E-04	54366.3	0.0164153	2.47E-04	113191	0.0193065
EBT00051366843	Arg1(ACG)	A	26	In between	ACG	1.80E-04	55273.7	0	1.95E-04	115419	0
EBT00051366843	Arg1(ACG)	C	27	Ac-stem	ACG	6.20E-04	55008.7	0.00822145	9.42E-04	115051	0.0087251
EBT00051366843	Arg1(ACG)	T	28	Ac-stem	ACG	2.76E-04	55464.7	9.49E-04	2.46E-04	116064	0.00159714
EBT00051366843	Arg1(ACG)	C	29	Ac-stem	ACG	8.13E-04	55517.3	0.00139701	0.00170047	116249	0.00105695
EBT00051366843	Arg1(ACG)	G	30	Ac-stem	ACG	0.00232143	55595	0.00223739	0.00126759	116372	0.0018698
EBT00051366843	Arg1(ACG)	G	31	Ac-stem	ACG	0.00247318	55719.7	0	0.00106463	116590	4.43E-04
EBT00051366843	Arg1(ACG)	C	32	Ac-loop	ACG	0.00662016	55641	0.00267669	0.00570151	116642	0.00207897
EBT00051366843	Arg1(ACG)	T	33	Ac-loop	ACG	2.93E-04	55790.3	0	2.57E-04	116885	0
EBT00051366843	Arg1(ACG)	A	34	Ac-loop	ACG	0.998762	55729.3	0.0162924	0.998905	116651	0.0162177
EBT00051366843	Arg1(ACG)	C	35	Ac-loop	ACG	9.56E-04	56652.3	0.00309705	0.00179674	118574	0.00346817
EBT00051366843	Arg1(ACG)	G	36	Ac-loop	ACG	0.00210516	56828.3	0.0140132	0.00111556	118987	0.0176106
EBT00051366843	Arg1(ACG)	A	37	Ac-loop	ACG	8.78E-04	57636	0	7.37E-04	121120	0
EBT00051366843	Arg1(ACG)	A	38	Ac-loop	ACG	1.58E-04	55394.7	0.0487573	1.63E-04	120166	0.0531326
EBT00051366843	Arg1(ACG)	C	39	Ac-stem	ACG	4.77E-04	58234	0.00314971	4.90E-04	126909	0.00220668
EBT00051366843	Arg1(ACG)	C	40	Ac-stem	ACG	4.80E-04	58418	0	4.36E-04	127190	0.00238704
EBT00051366843	Arg1(ACG)	G	41	Ac-stem	ACG	0.00218279	58412	0.00436354	0.00103103	127494	0.00614272
EBT00051366843	Arg1(ACG)	A	42	Ac-stem	ACG	3.53E-04	58668	0.00420375	4.05E-04	128282	0.00213137
EBT00051366843	Arg1(ACG)	G	43	Ac-stem	ACG	8.56E-04	58915.7	0.00593916	6.97E-04	128556	0.00195123
EBT00051366843	Arg1(ACG)	C	44	V-region	ACG	8.59E-04	59267.7	0	5.45E-04	128807	0.00139291
EBT00051366843	Arg1(ACG)	G	45	V-region	ACG	5.82E-04	50029	0.0342638	0.00257074	128987	0.0048963
EBT00051366843	Arg1(ACG)	G	46	V-region	ACG	0.0019274	51804	0.41909	0.00704137	129622	0.0101388
EBT00051366843	Arg1(ACG)	T	47	V-region	ACG	0.201176	89177.3	0.265883	4.47E-04	130949	0.00994221
EBT00051366843	Arg1(ACG)	C	48	V-region	ACG	2.33E-04	121476	0.00456979	9.13E-04	132264	0
EBT00051366843	Arg1(ACG)	G	49	T-stem	ACG	0.00109376	122033	0.00712721	0.00334955	132177	0.00207873
EBT00051366843	Arg1(ACG)	G	50	T-stem	ACG	3.87E-04	122909	0	4.77E-04	132452	0
EBT00051366843	Arg1(ACG)	A	51	T-stem	ACG	3.83E-04	121788	0.0160692	3.32E-04	129398	0.0299078
EBT00051366843	Arg1(ACG)	G	52	T-stem	ACG	4.51E-04	123777	2.32E-04	4.13E-04	133388	0
EBT00051366843	Arg1(ACG)	G	53	T-stem	ACG	1.81E-04	123806	0.00139271	1.83E-04	133288	0
EBT00051366843	Arg1(ACG)	T	54	T-loop	ACG	9.10E-05	123979	0.00571811	2.16E-04	133185	0.00648493
EBT00051366843	Arg1(ACG)	T	55	T-loop	ACG	1.93E-04	124692	0	3.41E-04	134054	0
EBT00051366843	Arg1(ACG)	C	56	T-loop	ACG	3.30E-04	124093	0.00299681	0.00129654	133502	0.00288796
EBT00051366843	Arg1(ACG)	G	57	T-loop	ACG	0.00105161	124466	0	0.00109041	133889	0
EBT00051366843	Arg1(ACG)	A	58	T-loop	ACG	1.18E-04	121534	0.0157039	3.37E-04	129160	0.0240979
EBT00051366843	Arg1(ACG)	A	59	T-loop	ACG	5.11E-05	123473	0.00910859	1.42E-04	132349	0.0106498
EBT00051366843	Arg1(ACG)	T	60	T-loop	ACG	1.08E-04	124608	0	2.73E-04	133774	0
EBT00051366843	Arg1(ACG)	C	61	T-stem	ACG	1.75E-04	123618	5.07E-04	4.08E-04	132726	0.00369318
EBT00051366843	Arg1(ACG)	C	62	T-stem	ACG	1.84E-04	123680	0.00709408	3.00E-04	133218	0.00377894
EBT00051366843	Arg1(ACG)	T	63	T-stem	ACG	1.47E-04	124564	0	3.39E-04	133724	0
EBT00051366843	Arg1(ACG)	C	64	T-stem	ACG	2.37E-04	124083	7.44E-04	9.27E-04	133329	0.00107638
EBT00051366843	Arg1(ACG)	C	65	T-stem	ACG	2.20E-04	124176	1.10E-04	9.04E-04	133473	0
EBT00051366843	Arg1(ACG)	T	66	Acc-stem	ACG	7.49E-05	124189	0	2.62E-04	133073	0
EBT00051366843	Arg1(ACG)	G	67	Acc-stem	ACG	4.57E-04	123917	0.00860322	5.62E-04	132876	0.0130357
EBT00051366843	Arg1(ACG)	A	68	Acc-stem	ACG	1.54E-04	124992	0	1.38E-04	134631	0
EBT00051366843	Arg1(ACG)	G	69	Acc-stem	ACG	5.39E-04	124009	0	5.45E-04	132730	0
EBT00051366843	Arg1(ACG)	T	70	Acc-stem	ACG	2.15E-04	123327	0.0062315	2.60E-04	131241	0.0138163
EBT00051366843	Arg1(ACG)	G	71	Acc-stem	ACG	0.00149258	124101	0	0.00110287	133079	6.98E-04
EBT00051366843	Arg1(ACG)	C	72	Acc-stem	ACG	0.00107494	123986	0.00194268	0.00206084	133172	0.00112509
EBT00051366843	Arg1(ACG)	G	73	In between	ACG	0.00344539	124227	0.00131574	0.00195614	133322	0.00317266
EBT00051366843	Arg1(ACG)	C	74	CCA	ACG	1.89E-05	124391	0	1.61E-05	133747	0
EBT00051366843	Arg1(ACG)	C	75	CCA	ACG	0	120884	0	0	128788	0
EBT00051366843	Arg1(ACG)	A	76	CCA	ACG	0	112915	0	0	117115	0
EBT00051366923	Glu1(UUC)	G	1	Acc-stem	UUC	0	64899.3	0.0301856	0	80093.7	0.0245525
EBT00051366923	Glu1(UUC)	T	2	Acc-stem	UUC	0	66919.3	0.0084066	0	82109.7	0.00873642
EBT00051366923	Glu1(UUC)	C	3	Acc-stem	UUC	0	67486.7	0	0	82833.3	0
EBT00051366923	Glu1(UUC)	C	4	Acc-stem	UUC	9.76E-04	67367	0	0.0018698	82625	0
EBT00051366923	Glu1(UUC)	C	5	Acc-stem	UUC	4.91E-04	67127	0.0105343	7.72E-04	82213.3	0.0129583
EBT00051366923	Glu1(UUC)	C	6	Acc-stem	UUC	4.92E-04	67841.7	0.0153271	5.41E-04	83292.7	0.0129134
EBT00051366923	Glu1(UUC)	T	7	Acc-stem	UUC	5.54E-04	68897.7	0.0124275	4.97E-04	84382.3	0.0127989
EBT00051366923	Glu1(UUC)	T	8	In between	UUC	0.00349314	69764.7	0.00285383	0.00201804	85476.3	0.00241975
EBT00051366923	Glu1(UUC)	C	9	In between	UUC	6.70E-04	69964.3	0.00384427	0.00100626	85683.7	0.0032997
EBT00051366923	Glu1(UUC)	G	10	D-stem	UUC	0.00530974	70234.3	0.0211379	0.0038732	85967.3	0.0175798
EBT00051366923	Glu1(UUC)	T	11	D-stem	UUC	3.49E-04	71751	0.0056404	3.31E-04	87505.7	0.00573794
EBT00051366923	Glu1(UUC)	C	12	D-stem	UUC	7.36E-04	72158	0.00934939	0.00104131	88010.7	0.00844224
EBT00051366923	Glu1(UUC)	T	13	D-stem	UUC	3.04E-04	72839	0	2.11E-04	88760	0
EBT00051366923	Glu1(UUC)	A	14	D-loop	UUC	2.75E-04	71649.7	0.016004	2.64E-04	87121	0.0176687
EBT00051366923	Glu1(UUC)	G	15	D-loop	UUC	0.00186103	72815	0.0106299	6.16E-04	88688	0.00687925
EBT00051366923	Glu1(UUC)	T	16	D-loop	UUC	9.50E-04	73597.3	0.00888356	9.71E-04	89302.3	0.00602897
EBT00051366923	Glu1(UUC)	G	18	D-loop	UUC	0.00169255	74257	0.0368784	6.64E-04	89844	0.038138
EBT00051366923	Glu1(UUC)	G	19	D-loop	UUC	5.33E-04	77100.3	0.0610155	2.61E-04	93406.3	0.0542408
EBT00051366923	Glu1(UUC)	C	20	D-loop	UUC	0.00108002	82110.3	0.0660578	0.002108	98763.3	0.0679774
EBT00051366923	Glu1(UUC)	C	20a	D-loop	UUC	0.00407014	87918	0	0.00319385	105967	0
EBT00051366923	Glu1(UUC)	T	20b	D-loop	UUC	0.0817093	75498	0.602029	0.0917189	81574	0.635577
EBT00051366923	Glu1(UUC)	A	21	D-loop	UUC	1.46E-04	189707	0.0160799	1.55E-04	223844	0.0165012
EBT00051366923	Glu1(UUC)	G	22	D-stem	UUC	0.00113127	192808	0.00772823	5.86E-04	227600	0.00523461
EBT00051366923	Glu1(UUC)	G	23	D-stem	UUC	0.00131574	194309	0.0221888	5.72E-04	228798	0.019629
EBT00051366923	Glu1(UUC)	A	24	D-stem	UUC	2.85E-04	198719	6.94E-04	2.85E-04	233379	0.00156012
EBT00051366923	Glu1(UUC)	C	25	D-stem	UUC	8.87E-04	198857	0.00490401	0.00149539	233743	0.00381721
EBT00051366923	Glu1(UUC)	A	26	In between	UUC	2.10E-04	199837	0.00958023	1.95E-04	234639	0.0109205
EBT00051366923	Glu1(UUC)	C	27	Ac-stem	UUC	4.55E-04	201770	0	6.76E-04	237230	0
EBT00051366923	Glu1(UUC)	C	28	Ac-stem	UUC	4.76E-04	201426	0.00216977	7.24E-04	236719	0.0020166
EBT00051366923	Glu1(UUC)	G	29	Ac-stem	UUC	6.86E-04	201864	0.00352128	5.59E-04	237198	0.00314776
EBT00051366923	Glu1(UUC)	C	30	Ac-stem	UUC	3.41E-04	202578	0.00386989	3.42E-04	237947	0.00388905
EBT00051366923	Glu1(UUC)	C	31	Ac-stem	UUC	2.92E-04	203365	0.00205284	3.17E-04	238876	0.00178574
EBT00051366923	Glu1(UUC)	C	32	Ac-loop	UUC	4.89E-04	203783	0.0141138	4.90E-04	239303	0.012604
EBT00051366923	Glu1(UUC)	T	33	Ac-loop	UUC	2.26E-04	206700	0.00319729	2.48E-04	242358	0.00241619
EBT00051366923	Glu1(UUC)	T	34	Ac-loop	UUC	0.00410552	207363	0.0114179	0.00271779	242945	0.0113564
EBT00051366923	Glu1(UUC)	T	35	Ac-loop	UUC	4.51E-04	209758	0	4.21E-04	245735	0
EBT00051366923	Glu1(UUC)	C	36	Ac-loop	UUC	0.00183479	208098	0.0212741	0.00189091	243878	0.022725
EBT00051366923	Glu1(UUC)	A	37	Ac-loop	UUC	5.65E-04	212622	0.015528	7.88E-04	249549	0.0163438
EBT00051366923	Glu1(UUC)	C	38	Ac-loop	UUC	5.93E-04	215975	0.00798449	6.46E-04	253695	0.00804036
EBT00051366923	Glu1(UUC)	G	39	Ac-stem	UUC	0.00177623	217714	0.00402877	0.00135304	255751	0.00407454
EBT00051366923	Glu1(UUC)	G	40	Ac-stem	UUC	2.90E-04	218594	0	2.44E-04	256798	0
EBT00051366923	Glu1(UUC)	C	41	Ac-stem	UUC	4.18E-04	216851	0.0102632	4.47E-04	254802	0.0102663
EBT00051366923	Glu1(UUC)	G	42	Ac-stem	UUC	9.22E-04	219099	0.00252973	7.30E-04	257445	0.00230327
EBT00051366923	Glu1(UUC)	G	43	Ac-stem	UUC	0.00231347	219655	0.0134531	0.00164802	258039	0.0135709
EBT00051366923	Glu1(UUC)	T	44	V-region	UUC	2.01E-04	222650	0	2.19E-04	261589	0
EBT00051366923	Glu1(UUC)	A	45	V-region	UUC	2.13E-04	219767	0.0213599	1.93E-04	258358	0.0210214
EBT00051366923	Glu1(UUC)	A	46	V-region	UUC	1.16E-04	224564	0	1.38E-04	263906	0
EBT00051366923	Glu1(UUC)	C	48	V-region	UUC	7.41E-04	224334	0	0.001364	263791	0
EBT00051366923	Glu1(UUC)	A	49	T-stem	UUC	2.71E-04	216201	0.0392647	2.60E-04	255286	0.0401242
EBT00051366923	Glu1(UUC)	G	50	T-stem	UUC	0.00396626	225037	0.00463837	0.00138299	265957	0.00315095
EBT00051366923	Glu1(UUC)	G	51	T-stem	UUC	0.00427459	226085	0.00499515	0.00178908	266798	0.00417667
EBT00051366923	Glu1(UUC)	G	52	T-stem	UUC	0.0044054	227220	0.00474514	0.00200036	267917	0.00374702
EBT00051366923	Glu1(UUC)	G	53	T-stem	UUC	0.004974	228304	0.0113358	0.00236602	268925	0.00623158
EBT00051366923	Glu1(UUC)	T	54	T-loop	UUC	2.25E-04	230921	0.00243213	1.92E-04	270611	0.00262418
EBT00051366923	Glu1(UUC)	T	55	T-loop	UUC	2.70E-04	231484	0	2.25E-04	271323	0
EBT00051366923	Glu1(UUC)	C	56	T-loop	UUC	8.65E-04	230565	0.0024963	0.00184859	270155	0.00259668
EBT00051366923	Glu1(UUC)	G	57	T-loop	UUC	0.00354177	231142	0.00362383	0.001079	270858	0.00371381
EBT00051366923	Glu1(UUC)	A	58	T-loop	UUC	2.54E-04	231983	0	2.19E-04	271868	0
EBT00051366923	Glu1(UUC)	G	59	T-loop	UUC	0.00248265	230799	0	0.00127372	270439	0
EBT00051366923	Glu1(UUC)	T	60	T-loop	UUC	2.90E-04	230327	1.26E-04	2.93E-04	269850	7.42E-04
EBT00051366923	Glu1(UUC)	C	61	T-stem	UUC	4.73E-04	230356	0	7.30E-04	270050	0
EBT00051366923	Glu1(UUC)	C	62	T-stem	UUC	4.65E-04	229667	0.00359226	7.54E-04	268983	0.00346033
EBT00051366923	Glu1(UUC)	C	63	T-stem	UUC	3.98E-04	230495	0.00391241	6.34E-04	269917	0.00452283
EBT00051366923	Glu1(UUC)	C	64	T-stem	UUC	5.13E-04	231401	0	7.41E-04	271143	0
EBT00051366923	Glu1(UUC)	T	65	T-stem	UUC	2.00E-04	229869	0	1.95E-04	269258	0
EBT00051366923	Glu1(UUC)	A	66	Acc-stem	UUC	1.55E-04	227781	0.0104424	2.00E-04	266952	0.00999577
EBT00051366923	Glu1(UUC)	G	67	Acc-stem	UUC	0.00143068	230184	4.28E-04	8.44E-04	269647	5.97E-04
EBT00051366923	Glu1(UUC)	G	68	Acc-stem	UUC	0.00125238	230283	0.00195319	5.54E-04	269808	0.00186697
EBT00051366923	Glu1(UUC)	G	69	Acc-stem	UUC	6.96E-04	230734	0.00115007	4.37E-04	270313	0.00136814
EBT00051366923	Glu1(UUC)	G	70	Acc-stem	UUC	6.14E-04	230999	6.52E-04	3.46E-04	270683	0.00125082
EBT00051366923	Glu1(UUC)	A	71	Acc-stem	UUC	3.75E-04	231150	0	2.76E-04	271022	0
EBT00051366923	Glu1(UUC)	C	72	Acc-stem	UUC	6.76E-04	230973	0	0.00116621	270724	0
EBT00051366923	Glu1(UUC)	G	73	In between	UUC	0.00288076	229927	0.00483602	0.00145623	269334	0.00526175
EBT00051366923	Glu1(UUC)	C	74	CCA	UUC	1.16E-05	231044	0	1.12E-05	270759	0
EBT00051366923	Glu1(UUC)	C	75	CCA	UUC	0	221671	0	0	257318	0
EBT00051366923	Glu1(UUC)	A	76	CCA	UUC	0	207609	0	0	233706	0
EBT00051367160	Phe1(GAA)	G	1	Acc-stem	GAA	0	62687.3	0.0229226	0	54960	0.0190152
EBT00051367160	Phe1(GAA)	C	2	Acc-stem	GAA	0	64158	0.00571854	0	56025.3	0.00635527
EBT00051367160	Phe1(GAA)	C	3	Acc-stem	GAA	0	64527	0	0	56383.7	0
EBT00051367160	Phe1(GAA)	C	4	Acc-stem	GAA	7.36E-04	63971	0	0.00154101	55527	0
EBT00051367160	Phe1(GAA)	A	5	Acc-stem	GAA	0.00408443	60040	0.0922423	0.00451849	52023.3	0.10057
EBT00051367160	Phe1(GAA)	G	6	Acc-stem	GAA	0.0011923	66141	0.0150065	0.00107766	57840.3	0.0186851
EBT00051367160	Phe1(GAA)	G	7	Acc-stem	GAA	0.00405145	67148.7	0.0517466	0.00367939	58941.7	0.0737297
EBT00051367160	Phe1(GAA)	T	8	In between	GAA	0.0213962	70813	0.00901241	0.0200261	63633.3	0.0109936
EBT00051367160	Phe1(GAA)	A	9	In between	GAA	4.21E-04	71457	0.0118921	3.26E-04	64340.7	0.0127661
EBT00051367160	Phe1(GAA)	G	10	D-stem	GAA	0.00340538	72317	0.0167106	0.0026346	65172.7	0.0146653
EBT00051367160	Phe1(GAA)	C	11	D-stem	GAA	0.00101747	73546	0.0779396	0.00127845	66142.7	0.0746258
EBT00051367160	Phe1(GAA)	T	12	D-stem	GAA	2.93E-04	79762.7	0	2.78E-04	71476.7	0
EBT00051367160	Phe1(GAA)	C	13	D-stem	GAA	7.28E-04	79615.3	0	0.00137835	71450.7	0
EBT00051367160	Phe1(GAA)	A	14	D-loop	GAA	2.66E-04	79480	0.0315781	2.93E-04	71032.3	0.03413
EBT00051367160	Phe1(GAA)	G	15	D-loop	GAA	0.00154336	82071.7	0.0376212	9.43E-04	73542.3	0.0266127
EBT00051367160	Phe1(GAA)	T	16	D-loop	GAA	2.12E-04	85280	0.00734096	2.41E-04	75553	0.00810898
EBT00051367160	Phe1(GAA)	T	17	D-loop	GAA	5.85E-04	85910.7	0.00579016	6.97E-04	76170.7	0.00586876
EBT00051367160	Phe1(GAA)	G	18	D-loop	GAA	0.00123732	86411	0.014252	7.18E-04	76620.3	0.0123955
EBT00051367160	Phe1(GAA)	G	19	D-loop	GAA	0.00208705	87660.3	0.0319088	0.00139872	77582	0.0311252
EBT00051367160	Phe1(GAA)	T	20	D-loop	GAA	6.04E-04	90549.7	0.00616098	5.52E-04	80074.3	0.00756853
EBT00051367160	Phe1(GAA)	A	21	D-loop	GAA	1.95E-04	91111	0	1.64E-04	80685	0
EBT00051367160	Phe1(GAA)	G	22	D-stem	GAA	0.00184718	91104.3	0.00712742	0.00139139	80602.7	0.00561329
EBT00051367160	Phe1(GAA)	A	23	D-stem	GAA	2.28E-04	91758.3	0.0056028	2.73E-04	81057.7	0.00462133
EBT00051367160	Phe1(GAA)	G	24	D-stem	GAA	0.00266387	92275.3	0.00804455	0.00118901	81434	0.00543485
EBT00051367160	Phe1(GAA)	C	25	D-stem	GAA	7.09E-04	93023.7	0.016046	9.31E-04	81879	0.0158459
EBT00051367160	Phe1(GAA)	A	26	In between	GAA	2.74E-04	94540.7	0	2.37E-04	83197.3	0
EBT00051367160	Phe1(GAA)	G	27	Ac-stem	GAA	0.0013243	94497	0.00269475	0.00206151	83143.7	0.00350368
EBT00051367160	Phe1(GAA)	G	28	Ac-stem	GAA	3.69E-04	94752.3	0.00391067	3.79E-04	83436	0.00307869
EBT00051367160	Phe1(GAA)	G	29	Ac-stem	GAA	3.33E-04	95124.3	0.00345715	3.78E-04	83693.7	0.00359147
EBT00051367160	Phe1(GAA)	G	30	Ac-stem	GAA	4.70E-04	95454.3	0.0175552	3.57E-04	83995.3	0.0145171
EBT00051367160	Phe1(GAA)	A	31	Ac-stem	GAA	2.42E-04	97160	0.00485487	2.23E-04	85232.7	0.00341422
EBT00051367160	Phe1(GAA)	T	32	Ac-loop	GAA	3.14E-04	97634	0.00291396	2.15E-04	85524.7	0.00286424
EBT00051367160	Phe1(GAA)	T	33	Ac-loop	GAA	4.28E-04	97919.3	0.0122295	4.54E-04	85770.3	0.0150096
EBT00051367160	Phe1(GAA)	G	34	Ac-loop	GAA	0.00211827	99131.7	0.0131963	0.00158826	87077.3	0.00593625
EBT00051367160	Phe1(GAA)	A	35	Ac-loop	GAA	5.86E-04	100457	0.0223226	6.89E-04	87597.3	0.0226675
EBT00051367160	Phe1(GAA)	A	36	Ac-loop	GAA	3.61E-04	102751	0.0323823	4.78E-04	89629	0.0324708
EBT00051367160	Phe1(GAA)	A	37	Ac-loop	GAA	0.0113008	106190	0.359763	0.0132343	92637	0.366378
EBT00051367160	Phe1(GAA)	A	38	Ac-loop	GAA	1.15E-04	165860	0.0188411	1.03E-04	146202	0.0165586
EBT00051367160	Phe1(GAA)	T	39	Ac-stem	GAA	1.93E-04	169045	0	1.22E-04	148664	0
EBT00051367160	Phe1(GAA)	C	40	Ac-stem	GAA	2.71E-04	169016	1.97E-05	2.56E-04	148564	3.70E-04
EBT00051367160	Phe1(GAA)	C	41	Ac-stem	GAA	6.25E-04	169019	0.00623629	7.70E-04	148619	0.00552048
EBT00051367160	Phe1(GAA)	C	42	Ac-stem	GAA	6.42E-04	170080	0.00247895	8.53E-04	149444	0.00267389
EBT00051367160	Phe1(GAA)	C	43	Ac-stem	GAA	6.36E-04	170502	0.00259536	8.34E-04	149844	0.00314889
EBT00051367160	Phe1(GAA)	G	44	V-region	GAA	0.00493151	170946	0.0131183	0.00254772	150318	0.00901212
EBT00051367160	Phe1(GAA)	T	45	V-region	GAA	3.20E-04	173218	0.00289735	2.68E-04	151685	0.00352557
EBT00051367160	Phe1(GAA)	G	46	V-region	GAA	0.016874	173722	0.0221513	0.0083005	152221	0.0140105
EBT00051367160	Phe1(GAA)	T	47	V-region	GAA	2.37E-04	177657	0	2.00E-04	154384	0
EBT00051367160	Phe1(GAA)	C	48	V-region	GAA	9.35E-04	177422	0	0.00197119	154191	0
EBT00051367160	Phe1(GAA)	G	49	T-stem	GAA	0.00418021	177398	0.00334096	0.00368163	154069	0.00411962
EBT00051367160	Phe1(GAA)	G	50	T-stem	GAA	0.00461467	177993	0.00270625	0.00166063	154707	0.0010955
EBT00051367160	Phe1(GAA)	C	51	T-stem	GAA	0.00115615	178476	0.00384376	0.00236941	154876	0.00386765
EBT00051367160	Phe1(GAA)	G	52	T-stem	GAA	0.00389498	179165	0.00329149	0.00142642	155478	0.00146644
EBT00051367160	Phe1(GAA)	G	53	T-stem	GAA	0.00307228	179756	0.00878415	0.00112128	155706	0.005694
EBT00051367160	Phe1(GAA)	T	54	T-loop	GAA	1.71E-04	181349	6.63E-04	1.51E-04	156598	6.91E-04
EBT00051367160	Phe1(GAA)	T	55	T-loop	GAA	2.38E-04	181470	0	3.02E-04	156706	0
EBT00051367160	Phe1(GAA)	C	56	T-loop	GAA	6.52E-04	180691	0.00320513	0.00131003	156067	0.00292605
EBT00051367160	Phe1(GAA)	G	57	T-loop	GAA	0.00341988	181272	0.00362773	0.00147745	156525	0.00362415
EBT00051367160	Phe1(GAA)	A	58	T-loop	GAA	1.69E-04	181932	0	1.25E-04	157094	0
EBT00051367160	Phe1(GAA)	T	59	T-loop	GAA	1.67E-04	181412	0	2.00E-04	156584	0
EBT00051367160	Phe1(GAA)	T	60	T-loop	GAA	4.04E-04	180948	0	4.58E-04	156256	0
EBT00051367160	Phe1(GAA)	C	61	T-stem	GAA	5.10E-04	180537	0	7.58E-04	155891	0
EBT00051367160	Phe1(GAA)	C	62	T-stem	GAA	3.33E-04	180337	0.00140834	4.02E-04	155733	0.00220617
EBT00051367160	Phe1(GAA)	G	63	T-stem	GAA	0.00561042	180591	0.0032124	0.00219296	156078	0.00207797
EBT00051367160	Phe1(GAA)	T	64	T-stem	GAA	2.96E-04	181173	0	3.34E-04	156403	0
EBT00051367160	Phe1(GAA)	C	65	T-stem	GAA	0.0011054	180868	0	0.00104131	156190	0
EBT00051367160	Phe1(GAA)	C	66	Acc-stem	GAA	4.71E-04	180616	0	7.50E-04	155878	0
EBT00051367160	Phe1(GAA)	C	67	Acc-stem	GAA	4.90E-04	180247	0	4.68E-04	155609	0
EBT00051367160	Phe1(GAA)	T	68	Acc-stem	GAA	2.95E-04	179113	0.00649899	2.92E-04	154737	0.00638069
EBT00051367160	Phe1(GAA)	G	69	Acc-stem	GAA	8.34E-04	180284	0.00150646	7.08E-04	155730	2.65E-04
EBT00051367160	Phe1(GAA)	G	70	Acc-stem	GAA	4.98E-04	180556	0.00273587	3.52E-04	155772	0.00345889
EBT00051367160	Phe1(GAA)	G	71	Acc-stem	GAA	9.02E-04	181052	2.83E-04	6.42E-04	156312	5.67E-04
EBT00051367160	Phe1(GAA)	C	72	Acc-stem	GAA	0.00132071	181103	0.00309361	0.00217114	156401	0.00284565
EBT00051367160	Phe1(GAA)	A	73	In between	GAA	5.00E-04	181665	0	4.44E-04	156847	0
EBT00051367160	Phe1(GAA)	C	74	CCA	GAA	1.12E-05	181301	0	7.41E-06	156552	0
EBT00051367160	Phe1(GAA)	C	75	CCA	GAA	0	178240	0	0	153474	0
EBT00051367160	Phe1(GAA)	A	76	CCA	GAA	0	171511	0.139003	0	146683	0.435326
EBT00051367353	Gly1(GCC)	G	1	Acc-stem	GCC	0	199200	0.0259883	0	259765	0.0104995
EBT00051367353	Gly1(GCC)	C	2	Acc-stem	GCC	0	204515	0.00760859	0	262522	0.0111309
EBT00051367353	Gly1(GCC)	G	3	Acc-stem	GCC	0	206083	4.75E-04	0	265477	0
EBT00051367353	Gly1(GCC)	G	4	Acc-stem	GCC	5.65E-04	206181	0.00211179	4.41E-04	265212	0.00197814
EBT00051367353	Gly1(GCC)	G	5	Acc-stem	GCC	8.02E-04	206617	0	6.68E-04	265737	0
EBT00051367353	Gly1(GCC)	A	6	Acc-stem	GCC	4.71E-04	206190	0.012101	5.27E-04	264670	0.0132563
EBT00051367353	Gly1(GCC)	A	7	Acc-stem	GCC	2.77E-04	208715	0.0111965	1.74E-04	268225	0.00921981
EBT00051367353	Gly1(GCC)	T	8	In between	GCC	0.0140912	211079	0	0.00787574	270721	0
EBT00051367353	Gly1(GCC)	A	9	In between	GCC	2.30E-04	205679	0.0273508	2.08E-04	265108	0.0217284
EBT00051367353	Gly1(GCC)	G	10	D-stem	GCC	0.00174214	211463	0	0.00134119	270997	0
EBT00051367353	Gly1(GCC)	C	11	D-stem	GCC	5.00E-04	211324	0.0256553	7.42E-04	270335	0.0228267
EBT00051367353	Gly1(GCC)	T	12	D-stem	GCC	2.91E-04	216889	0	2.72E-04	276650	0
EBT00051367353	Gly1(GCC)	C	13	D-stem	GCC	5.48E-04	215264	0	8.11E-04	274679	0
EBT00051367353	Gly1(GCC)	A	14	D-loop	GCC	2.08E-04	212057	0.0387378	1.70E-04	270820	0.0348069
EBT00051367353	Gly1(GCC)	G	15	D-loop	GCC	5.77E-04	220603	0.0212648	3.08E-04	280586	0.0141663
EBT00051367353	Gly1(GCC)	T	16	D-loop	GCC	2.57E-04	225396	0.00574332	2.63E-04	284618	0.00486232
EBT00051367353	Gly1(GCC)	T	17	D-loop	GCC	2.46E-04	226698	0.00387702	2.73E-04	286009	0.00364737
EBT00051367353	Gly1(GCC)	G	18	D-loop	GCC	8.41E-04	227580	0.00926823	4.00E-04	287056	0.00616267
EBT00051367353	Gly1(GCC)	G	19	D-loop	GCC	0.00133197	229709	0.0143599	6.78E-04	288836	0.0104233
EBT00051367353	Gly1(GCC)	T	20	D-loop	GCC	6.55E-04	233056	0.00532641	7.38E-04	291878	0.00535808
EBT00051367353	Gly1(GCC)	A	21	D-loop	GCC	1.76E-04	234304	0	1.76E-04	293451	0
EBT00051367353	Gly1(GCC)	G	22	D-stem	GCC	0.00124054	233821	0.00205716	9.05E-04	292590	6.76E-04
EBT00051367353	Gly1(GCC)	A	23	D-stem	GCC	1.83E-04	234303	0.00258821	1.83E-04	292788	0.00253578
EBT00051367353	Gly1(GCC)	G	24	D-stem	GCC	9.31E-04	234911	0.00307254	6.67E-04	293532	0.00141069
EBT00051367353	Gly1(GCC)	C	25	D-stem	GCC	9.12E-04	235635	0.01696	0.00148282	293947	0.0151847
EBT00051367353	Gly1(GCC)	A	26	In between	GCC	2.01E-04	239701	0	2.42E-04	298479	0
EBT00051367353	Gly1(GCC)	C	27	Ac-stem	GCC	0.00140358	239546	0	0.00362399	298313	0
EBT00051367353	Gly1(GCC)	G	28	Ac-stem	GCC	4.58E-04	239428	0	4.15E-04	297871	0
EBT00051367353	Gly1(GCC)	A	29	Ac-stem	GCC	1.40E-04	234845	0.0352959	1.88E-04	289713	0.0394429
EBT00051367353	Gly1(GCC)	C	30	Ac-stem	GCC	2.64E-04	243437	0.00271201	3.41E-04	301609	0.00283228
EBT00051367353	Gly1(GCC)	C	31	Ac-stem	GCC	3.89E-04	244099	0.00425738	4.45E-04	302466	0.001915
EBT00051367353	Gly1(GCC)	T	32	Ac-loop	GCC	2.14E-04	245143	0	2.47E-04	303046	0
EBT00051367353	Gly1(GCC)	T	33	Ac-loop	GCC	2.77E-04	244777	0.00341184	3.05E-04	302310	0.00378415
EBT00051367353	Gly1(GCC)	G	34	Ac-loop	GCC	0.00228285	245615	0.0221515	0.00150746	303458	0.0184012
EBT00051367353	Gly1(GCC)	C	35	Ac-loop	GCC	0.00132478	251179	0.0746051	0.00217322	309147	0.0567568
EBT00051367353	Gly1(GCC)	C	36	Ac-loop	GCC	7.25E-04	271429	0.043042	0.00139652	327749	0.0345321
EBT00051367353	Gly1(GCC)	A	37	Ac-loop	GCC	3.00E-04	283638	0	2.69E-04	339472	0
EBT00051367353	Gly1(GCC)	A	38	Ac-loop	GCC	1.70E-04	280966	0.0167557	1.44E-04	335222	0.0167415
EBT00051367353	Gly1(GCC)	G	39	Ac-stem	GCC	0.00116841	285754	0.00430561	8.16E-04	340930	0.00318501
EBT00051367353	Gly1(GCC)	G	40	Ac-stem	GCC	8.86E-04	286990	0.0104726	6.37E-04	342019	0.00799458
EBT00051367353	Gly1(GCC)	T	41	Ac-stem	GCC	1.68E-04	290027	0.00138072	2.42E-04	344775	0.00200597
EBT00051367353	Gly1(GCC)	C	42	Ac-stem	GCC	4.78E-04	290428	0	6.17E-04	345468	0
EBT00051367353	Gly1(GCC)	G	43	Ac-stem	GCC	0.00102096	289665	0.00174953	8.00E-04	344470	4.26E-04
EBT00051367353	Gly1(GCC)	G	44	V-region	GCC	9.65E-04	290173	0.00310571	7.37E-04	344617	0.0032039
EBT00051367353	Gly1(GCC)	G	45	V-region	GCC	6.68E-04	291077	0.00235692	3.92E-04	345724	0.00219346
EBT00051367353	Gly1(GCC)	G	46	V-region	GCC	0.0038427	291765	0.00707744	0.00357676	346484	0.00512249
EBT00051367353	Gly1(GCC)	T	47	V-region	GCC	8.38E-04	293844	0	1.73E-04	348268	0
EBT00051367353	Gly1(GCC)	C	48	V-region	GCC	7.41E-04	293226	0.00152437	0.00139829	347221	0.00152408
EBT00051367353	Gly1(GCC)	G	49	T-stem	GCC	0.00233122	293674	0	0.00142528	347751	0
EBT00051367353	Gly1(GCC)	C	50	T-stem	GCC	2.70E-04	243097	0.17483	3.59E-04	287834	0.173759
EBT00051367353	Gly1(GCC)	G	51	T-stem	GCC	0.00189046	294602	0	8.73E-04	348366	0
EBT00051367353	Gly1(GCC)	A	52	T-stem	GCC	1.97E-04	293736	0.00637193	1.93E-04	347212	0.00554873
EBT00051367353	Gly1(GCC)	G	53	T-stem	GCC	0.00181048	295619	0.00473919	8.70E-04	349149	0.00286827
EBT00051367353	Gly1(GCC)	T	54	T-loop	GCC	1.90E-04	297027	0.00145566	2.43E-04	350153	0.00130724
EBT00051367353	Gly1(GCC)	T	55	T-loop	GCC	1.74E-04	297460	0	2.08E-04	350612	0
EBT00051367353	Gly1(GCC)	C	56	T-loop	GCC	4.94E-04	294597	0.00666165	7.61E-04	346858	0.00745145
EBT00051367353	Gly1(GCC)	G	57	T-loop	GCC	0.00245851	296573	8.69E-04	0.00172656	349462	0.00104528
EBT00051367353	Gly1(GCC)	A	58	T-loop	GCC	1.70E-04	296831	0	1.70E-04	349828	0
EBT00051367353	Gly1(GCC)	G	59	T-loop	GCC	0.00232149	296735	0	0.00142501	349521	0
EBT00051367353	Gly1(GCC)	T	60	T-loop	GCC	2.54E-04	296591	6.73E-04	2.57E-04	349412	0.00104923
EBT00051367353	Gly1(GCC)	C	61	T-stem	GCC	4.90E-04	296790	2.65E-04	6.84E-04	349779	2.64E-04
EBT00051367353	Gly1(GCC)	T	62	T-stem	GCC	2.27E-04	296869	0	2.15E-04	349872	0
EBT00051367353	Gly1(GCC)	C	63	T-stem	GCC	6.39E-04	295714	5.75E-04	9.32E-04	348591	3.98E-04
EBT00051367353	Gly1(GCC)	G	64	T-stem	GCC	0.00505268	295884	0	0.00276793	348730	0
EBT00051367353	Gly1(GCC)	T	65	T-stem	GCC	2.13E-04	293989	0.00401234	2.32E-04	346427	0.00481086
EBT00051367353	Gly1(GCC)	T	66	Acc-stem	GCC	2.00E-04	295173	0	2.39E-04	348102	0
EBT00051367353	Gly1(GCC)	T	67	Acc-stem	GCC	2.20E-04	293004	0.00220443	2.25E-04	346201	2.20E-04
EBT00051367353	Gly1(GCC)	C	68	Acc-stem	GCC	4.69E-04	293651	0	6.29E-04	346278	0
EBT00051367353	Gly1(GCC)	C	69	Acc-stem	GCC	5.22E-04	290487	0.0196661	6.51E-04	342644	0.0179297
EBT00051367353	Gly1(GCC)	C	70	Acc-stem	GCC	7.67E-04	296314	0	0.00149353	348900	0
EBT00051367353	Gly1(GCC)	G	71	Acc-stem	GCC	0.00138639	294820	0.00807371	0.00126564	347179	0.00874066
EBT00051367353	Gly1(GCC)	C	72	Acc-stem	GCC	7.62E-04	297220	0	0.00128999	350241	0
EBT00051367353	Gly1(GCC)	T	73	In between	GCC	5.52E-04	288122	0.0265458	5.59E-04	337945	0.0312737
EBT00051367353	Gly1(GCC)	C	74	CCA	GCC	3.13E-05	295979	0	4.10E-05	348855	0
EBT00051367353	Gly1(GCC)	C	75	CCA	GCC	0	293757	0	0	345037	0
EBT00051367353	Gly1(GCC)	A	76	CCA	GCC	0	280192	0	0	325642	0
EBT00051367446	Arg2(ACG)	G	1	Acc-stem	ACG	NA	0	NA	NA	0	NA
EBT00051367446	Arg2(ACG)	G	2	Acc-stem	ACG	NA	0	NA	NA	0	NA
EBT00051367446	Arg2(ACG)	T	3	Acc-stem	ACG	NA	0	NA	NA	0	NA
EBT00051367446	Arg2(ACG)	T	4	Acc-stem	ACG	NA	0	NA	NA	0	NA
EBT00051367446	Arg2(ACG)	C	5	Acc-stem	ACG	NA	0	NA	NA	0	NA
EBT00051367446	Arg2(ACG)	G	6	Acc-stem	ACG	NA	0	NA	NA	0	NA
EBT00051367446	Arg2(ACG)	A	7	Acc-stem	ACG	NA	0	NA	NA	0	NA
EBT00051367446	Arg2(ACG)	T	8	In between	ACG	NA	0	NA	NA	0	NA
EBT00051367446	Arg2(ACG)	A	9	In between	ACG	NA	0	NA	NA	0	NA
EBT00051367446	Arg2(ACG)	G	10	D-stem	ACG	NA	0	NA	NA	0	NA
EBT00051367446	Arg2(ACG)	C	11	D-stem	ACG	NA	0	NA	NA	0	NA
EBT00051367446	Arg2(ACG)	T	12	D-stem	ACG	NA	0	NA	NA	0	NA
EBT00051367446	Arg2(ACG)	C	13	D-stem	ACG	NA	0	NA	NA	0	NA
EBT00051367446	Arg2(ACG)	A	14	D-loop	ACG	NA	0	NA	NA	0	NA
EBT00051367446	Arg2(ACG)	G	15	D-loop	ACG	NA	0	NA	NA	0	NA
EBT00051367446	Arg2(ACG)	C	16	D-loop	ACG	NA	0	NA	NA	0	NA
EBT00051367446	Arg2(ACG)	C	17	D-loop	ACG	NA	0	NA	NA	0	NA
EBT00051367446	Arg2(ACG)	T	18	D-loop	ACG	NA	0	NA	NA	0	NA
EBT00051367446	Arg2(ACG)	G	19	D-loop	ACG	NA	0	NA	NA	0	NA
EBT00051367446	Arg2(ACG)	G	20	D-loop	ACG	NA	0	NA	NA	0	NA
EBT00051367446	Arg2(ACG)	T	20a	D-loop	ACG	NA	0	NA	NA	0	NA
EBT00051367446	Arg2(ACG)	A	21	D-loop	ACG	NA	0	NA	NA	0	NA
EBT00051367446	Arg2(ACG)	G	22	D-stem	ACG	NA	0	NA	NA	0	NA
EBT00051367446	Arg2(ACG)	A	23	D-stem	ACG	NA	0	NA	NA	0	NA
EBT00051367446	Arg2(ACG)	G	24	D-stem	ACG	NA	0	NA	NA	0	NA
EBT00051367446	Arg2(ACG)	C	25	D-stem	ACG	NA	0	NA	NA	0	NA
EBT00051367446	Arg2(ACG)	A	26	In between	ACG	NA	0	NA	NA	0	NA
EBT00051367446	Arg2(ACG)	A	27	Ac-stem	ACG	NA	0	NA	NA	0	NA
EBT00051367446	Arg2(ACG)	C	28	Ac-stem	ACG	NA	0	NA	NA	0	NA
EBT00051367446	Arg2(ACG)	C	29	Ac-stem	ACG	NA	0	NA	NA	0	NA
EBT00051367446	Arg2(ACG)	A	30	Ac-stem	ACG	NA	0	NA	NA	0	NA
EBT00051367446	Arg2(ACG)	T	31	Ac-stem	ACG	NA	0	NA	NA	0	NA
EBT00051367446	Arg2(ACG)	C	32	Ac-loop	ACG	NA	0	NA	NA	0	NA
EBT00051367446	Arg2(ACG)	C	33	Ac-loop	ACG	NA	0	NA	NA	0	NA
EBT00051367446	Arg2(ACG)	A	34	Ac-loop	ACG	NA	0	NA	NA	0	NA
EBT00051367446	Arg2(ACG)	C	35	Ac-loop	ACG	NA	0	NA	NA	0	NA
EBT00051367446	Arg2(ACG)	G	36	Ac-loop	ACG	NA	0	NA	NA	0	NA
EBT00051367446	Arg2(ACG)	A	37	Ac-loop	ACG	NA	0	NA	NA	0	NA
EBT00051367446	Arg2(ACG)	A	38	Ac-loop	ACG	NA	0	NA	NA	0	NA
EBT00051367446	Arg2(ACG)	A	39	Ac-stem	ACG	NA	0	NA	NA	0	NA
EBT00051367446	Arg2(ACG)	T	40	Ac-stem	ACG	NA	0	NA	NA	0	NA
EBT00051367446	Arg2(ACG)	G	41	Ac-stem	ACG	NA	0	NA	NA	0	NA
EBT00051367446	Arg2(ACG)	G	42	Ac-stem	ACG	NA	0	NA	NA	0	NA
EBT00051367446	Arg2(ACG)	T	43	Ac-stem	ACG	NA	0	NA	NA	0	NA
EBT00051367446	Arg2(ACG)	C	44	V-region	ACG	NA	0	NA	NA	0	NA
EBT00051367446	Arg2(ACG)	T	45	V-region	ACG	NA	0	NA	NA	0	NA
EBT00051367446	Arg2(ACG)	G	46	V-region	ACG	NA	0	NA	NA	0	NA
EBT00051367446	Arg2(ACG)	T	47	V-region	ACG	NA	0	NA	NA	0	NA
EBT00051367446	Arg2(ACG)	C	48	V-region	ACG	NA	0	NA	NA	0	NA
EBT00051367446	Arg2(ACG)	G	49	T-stem	ACG	NA	0	NA	NA	0	NA
EBT00051367446	Arg2(ACG)	C	50	T-stem	ACG	NA	0	NA	NA	0	NA
EBT00051367446	Arg2(ACG)	G	51	T-stem	ACG	NA	0	NA	NA	0	NA
EBT00051367446	Arg2(ACG)	G	52	T-stem	ACG	NA	0	NA	NA	0	NA
EBT00051367446	Arg2(ACG)	G	53	T-stem	ACG	NA	0	NA	NA	0	NA
EBT00051367446	Arg2(ACG)	T	54	T-loop	ACG	NA	0	NA	NA	0	NA
EBT00051367446	Arg2(ACG)	T	55	T-loop	ACG	NA	0	NA	NA	0	NA
EBT00051367446	Arg2(ACG)	C	56	T-loop	ACG	NA	0	NA	NA	0	NA
EBT00051367446	Arg2(ACG)	G	57	T-loop	ACG	NA	0	NA	NA	0	NA
EBT00051367446	Arg2(ACG)	A	58	T-loop	ACG	NA	0	NA	NA	0	NA
EBT00051367446	Arg2(ACG)	C	59	T-loop	ACG	NA	0	NA	NA	0	NA
EBT00051367446	Arg2(ACG)	T	60	T-loop	ACG	NA	0	NA	NA	0	NA
EBT00051367446	Arg2(ACG)	C	61	T-stem	ACG	NA	0	NA	NA	0	NA
EBT00051367446	Arg2(ACG)	C	62	T-stem	ACG	NA	0	NA	NA	0	NA
EBT00051367446	Arg2(ACG)	C	63	T-stem	ACG	NA	0	NA	NA	0	NA
EBT00051367446	Arg2(ACG)	G	64	T-stem	ACG	NA	0	NA	NA	0	NA
EBT00051367446	Arg2(ACG)	C	65	T-stem	ACG	NA	0	NA	NA	0	NA
EBT00051367446	Arg2(ACG)	T	66	Acc-stem	ACG	NA	0	NA	NA	0	NA
EBT00051367446	Arg2(ACG)	C	67	Acc-stem	ACG	NA	0	NA	NA	0	NA
EBT00051367446	Arg2(ACG)	G	68	Acc-stem	ACG	NA	0	NA	NA	0	NA
EBT00051367446	Arg2(ACG)	A	69	Acc-stem	ACG	NA	0	NA	NA	0	NA
EBT00051367446	Arg2(ACG)	A	70	Acc-stem	ACG	NA	0	NA	NA	0	NA
EBT00051367446	Arg2(ACG)	C	71	Acc-stem	ACG	NA	0	NA	NA	0	NA
EBT00051367446	Arg2(ACG)	G	72	Acc-stem	ACG	NA	0	NA	NA	0	NA
EBT00051367446	Arg2(ACG)	T	73	Acc-stem	ACG	NA	0	NA	NA	0	NA
EBT00051367446	Arg2(ACG)	C	74	CCA	ACG	NA	0	NA	NA	0	NA
EBT00051367446	Arg2(ACG)	C	75	CCA	ACG	NA	0	NA	NA	0	NA
EBT00051367446	Arg2(ACG)	A	76	CCA	ACG	NA	0	NA	NA	0	NA
EBT00051367609	Gly1(UCC)	G	1	Acc-stem	UCC	0	43807.7	0.0157719	0	53788.3	0.00372911
EBT00051367609	Gly1(UCC)	C	2	Acc-stem	UCC	0	44509.7	0.0140149	0	53989.7	0.0181376
EBT00051367609	Gly1(UCC)	G	3	Acc-stem	UCC	0	45142.3	6.71E-04	0	54987	3.64E-05
EBT00051367609	Gly1(UCC)	G	4	Acc-stem	UCC	7.21E-04	45172.7	0.00469311	6.49E-04	54989	0.00434554
EBT00051367609	Gly1(UCC)	G	5	Acc-stem	UCC	0.00125517	45385.7	0	9.87E-04	55229	0
EBT00051367609	Gly1(UCC)	T	6	Acc-stem	UCC	7.87E-04	45149	0.00197473	0.00118598	54811.7	0.00139678
EBT00051367609	Gly1(UCC)	A	7	Acc-stem	UCC	3.88E-04	45238.3	0.0292828	2.05E-04	54888.3	0.0317867
EBT00051367609	Gly1(UCC)	T	8	In between	UCC	0.0647318	46603	0.00412428	0.0551894	56690.3	0.00436725
EBT00051367609	Gly1(UCC)	A	9	In between	UCC	3.05E-04	46796	0.020239	2.12E-04	56939	0.0201795
EBT00051367609	Gly1(UCC)	G	10	D-stem	UCC	0.00673076	47762.7	0.0280156	0.0037303	58111.7	0.0209089
EBT00051367609	Gly1(UCC)	T	11	D-stem	UCC	4.18E-04	49139.3	0.019188	3.85E-04	59352.7	0.0186344
EBT00051367609	Gly1(UCC)	T	12	D-stem	UCC	3.21E-04	50100.7	0	2.47E-04	60479.7	0
EBT00051367609	Gly1(UCC)	C	13	D-stem	UCC	7.53E-04	49771.7	0	0.00144328	60202.3	0
EBT00051367609	Gly1(UCC)	A	14	D-loop	UCC	3.61E-04	49002	0.0274551	3.24E-04	59284.3	0.0265245
EBT00051367609	Gly1(UCC)	G	15	D-loop	UCC	0.00168018	50385.3	0.00686592	6.90E-04	60899.7	0.00505372
EBT00051367609	Gly1(UCC)	T	16	D-loop	UCC	2.32E-04	50733.7	0	2.17E-04	61209	0
EBT00051367609	Gly1(UCC)	G	18	D-loop	UCC	0.00103065	50693.7	0.00344676	7.47E-04	61149	0.0030867
EBT00051367609	Gly1(UCC)	G	19	D-loop	UCC	9.15E-04	50869	0.0129552	4.20E-04	61338.3	0.0114692
EBT00051367609	Gly1(UCC)	T	20	D-loop	UCC	7.35E-04	51536.7	6.53E-04	7.23E-04	62050	0.00144834
EBT00051367609	Gly1(UCC)	A	21	D-loop	UCC	2.19E-04	51570.3	0	1.67E-04	62140	0
EBT00051367609	Gly1(UCC)	G	22	D-stem	UCC	0.00126588	51530	0	8.37E-04	62042.3	0
EBT00051367609	Gly1(UCC)	A	23	D-stem	UCC	2.17E-04	48884	0.0529171	2.29E-04	58070.7	0.0635475
EBT00051367609	Gly1(UCC)	G	24	D-stem	UCC	0.00145152	51615.3	0.00567011	0.0013349	62011.3	0.0055274
EBT00051367609	Gly1(UCC)	C	25	D-stem	UCC	5.42E-04	51909.7	0.00496467	8.72E-04	62356	0.00452855
EBT00051367609	Gly1(UCC)	C	26	In between	UCC	4.96E-04	52168.7	0.0103201	7.37E-04	62639.7	0.0069858
EBT00051367609	Gly1(UCC)	T	27	Ac-stem	UCC	1.33E-04	52712.7	0	1.81E-04	63080.3	0
EBT00051367609	Gly1(UCC)	C	28	Ac-stem	UCC	7.42E-04	52679	6.33E-05	0.00172406	63055.3	0
EBT00051367609	Gly1(UCC)	A	29	Ac-stem	UCC	4.23E-04	52682.3	0.00168022	2.37E-04	63008	0.00163732
EBT00051367609	Gly1(UCC)	G	30	Ac-stem	UCC	0.00114691	52771	7.26E-04	9.04E-04	63111.3	0
EBT00051367609	Gly1(UCC)	C	31	Ac-stem	UCC	5.12E-04	52809.3	0.00189631	0.00104977	63068	0.0028617
EBT00051367609	Gly1(UCC)	C	32	Ac-loop	UCC	0.0113838	52909.7	0.049396	0.011399	63249	0.0348821
EBT00051367609	Gly1(UCC)	T	33	Ac-loop	UCC	2.44E-04	55659	0.00901505	2.34E-04	65535	0.00783718
EBT00051367609	Gly1(UCC)	T	34	Ac-loop	UCC	0.00104892	56165.3	0	0.00106091	66052.7	0
EBT00051367609	Gly1(UCC)	C	35	Ac-loop	UCC	6.22E-04	56016	0.00572727	7.45E-04	65857.3	0.00494576
EBT00051367609	Gly1(UCC)	C	36	Ac-loop	UCC	9.59E-04	56338.7	0.00697986	9.41E-04	66184.7	0.00419778
EBT00051367609	Gly1(UCC)	A	37	Ac-loop	UCC	2.98E-04	56734.7	0.00219255	2.46E-04	66463.7	6.06E-04
EBT00051367609	Gly1(UCC)	A	38	Ac-loop	UCC	3.08E-04	56859.3	0.00614684	2.60E-04	66504	0.00588956
EBT00051367609	Gly1(UCC)	G	39	Ac-stem	UCC	0.00345999	57211	0	0.00232216	66898	0
EBT00051367609	Gly1(UCC)	C	40	Ac-stem	UCC	4.62E-04	57022.3	0.010069	4.85E-04	66443.7	0.0101699
EBT00051367609	Gly1(UCC)	T	41	Ac-stem	UCC	2.13E-04	57602.3	0.00331638	2.76E-04	67126.3	0.00316308
EBT00051367609	Gly1(UCC)	G	42	Ac-stem	UCC	0.00110993	57794	0.00636702	6.95E-04	67339.3	0.00440585
EBT00051367609	Gly1(UCC)	A	43	Ac-stem	UCC	1.96E-04	58164.3	0	1.15E-04	67637.3	0
EBT00051367609	Gly1(UCC)	T	44	V-region	UCC	2.27E-04	58027.3	0.00170319	2.71E-04	67445.3	0.00235684
EBT00051367609	Gly1(UCC)	G	45	V-region	UCC	0.00666782	58126.3	0.0121681	0.00522418	67604.7	0.00856932
EBT00051367609	Gly1(UCC)	A	46	V-region	UCC	2.94E-04	58842.3	3.40E-05	2.16E-04	68189	0
EBT00051367609	Gly1(UCC)	T	48	V-region	UCC	2.95E-04	58844.3	0	2.72E-04	68156	0
EBT00051367609	Gly1(UCC)	G	49	T-stem	UCC	0.00882533	58708.3	0	0.00537793	68007	0
EBT00051367609	Gly1(UCC)	C	50	T-stem	UCC	6.41E-04	58550.3	0.0102775	9.31E-04	67390	0.0117464
EBT00051367609	Gly1(UCC)	G	51	T-stem	UCC	4.92E-04	59158.3	0	3.96E-04	68191	0
EBT00051367609	Gly1(UCC)	G	52	T-stem	UCC	2.53E-04	59124.3	0.00245768	3.08E-04	68096.3	0.00231487
EBT00051367609	Gly1(UCC)	G	53	T-stem	UCC	4.87E-04	59270	0.00241248	3.70E-04	68254.3	0.0016431
EBT00051367609	Gly1(UCC)	T	54	T-loop	UCC	1.68E-04	59413.3	0	2.82E-04	68366.7	1.46E-05
EBT00051367609	Gly1(UCC)	T	55	T-loop	UCC	1.56E-04	59384	0	1.64E-04	68367.7	0
EBT00051367609	Gly1(UCC)	C	56	T-loop	UCC	5.25E-04	59124.7	0.00545566	8.39E-04	68105.3	0.0051758
EBT00051367609	Gly1(UCC)	G	57	T-loop	UCC	0.00219911	59449	0.00217639	0.00154472	68459.7	0.00120121
EBT00051367609	Gly1(UCC)	A	58	T-loop	UCC	3.17E-04	59578.7	0	1.68E-04	68542	0
EBT00051367609	Gly1(UCC)	T	59	T-loop	UCC	2.36E-04	59250	0	2.41E-04	68238	0
EBT00051367609	Gly1(UCC)	T	60	T-loop	UCC	3.27E-04	58541	0.00215338	4.22E-04	67377.3	0.00295465
EBT00051367609	Gly1(UCC)	C	61	T-stem	UCC	6.17E-04	58667.3	0.00732652	0.00127431	67577	0.00580146
EBT00051367609	Gly1(UCC)	C	62	T-stem	UCC	6.06E-04	59100.3	0.00452537	0.00127402	67971.3	0.00544796
EBT00051367609	Gly1(UCC)	C	63	T-stem	UCC	3.87E-04	59369	0	3.61E-04	68343.7	0
EBT00051367609	Gly1(UCC)	G	64	T-stem	UCC	0.00122434	59302	0.00318254	0.00114472	68286	0.00235704
EBT00051367609	Gly1(UCC)	C	65	T-stem	UCC	9.01E-04	59491.3	0	0.0012582	68447.3	0
EBT00051367609	Gly1(UCC)	T	66	Acc-stem	UCC	1.71E-04	59389	0.00340092	2.26E-04	68402.7	0.00258579
EBT00051367609	Gly1(UCC)	A	67	Acc-stem	UCC	3.13E-04	59591.7	0	1.30E-04	68580	0
EBT00051367609	Gly1(UCC)	C	68	Acc-stem	UCC	3.76E-04	59265.3	0	5.51E-04	68205	0
EBT00051367609	Gly1(UCC)	C	69	Acc-stem	UCC	8.83E-04	58856	0.0094084	0.00138924	67692.7	0.0102688
EBT00051367609	Gly1(UCC)	C	70	Acc-stem	UCC	5.06E-04	59415	0	5.10E-04	68395	0
EBT00051367609	Gly1(UCC)	G	71	Acc-stem	UCC	5.29E-04	58981	0.00905578	2.88E-04	67912	0.00872865
EBT00051367609	Gly1(UCC)	C	72	Acc-stem	UCC	5.72E-04	59520	0	5.29E-04	68510	0
EBT00051367609	Gly1(UCC)	T	73	In between	UCC	5.77E-04	57284.3	0.0371572	4.51E-04	66118.3	0.0345574
EBT00051367609	Gly1(UCC)	C	74	CCA	UCC	3.30E-05	59495	0	9.87E-06	68485	0
EBT00051367609	Gly1(UCC)	C	75	CCA	UCC	0	58868.7	0	0	67657	0
EBT00051367609	Gly1(UCC)	A	76	CCA	UCC	0	55484	0	0	63068.7	0
EBT00051367683	Thr1(CGU)	G	1	Acc-stem	CGU	0	14884	0.0193271	0	12663.3	0.0163383
EBT00051367683	Thr1(CGU)	C	2	Acc-stem	CGU	0	15177.3	0.00600345	0	12873.7	0.00999718
EBT00051367683	Thr1(CGU)	C	3	Acc-stem	CGU	0	15269	0.00324223	0	13003.7	1.79E-04
EBT00051367683	Thr1(CGU)	G	4	Acc-stem	CGU	7.53E-04	15318.7	0.00173777	6.41E-04	13006	0.00242886
EBT00051367683	Thr1(CGU)	G	5	Acc-stem	CGU	0.00126102	15345.3	0.00604543	5.93E-04	13037.7	0.00723387
EBT00051367683	Thr1(CGU)	A	6	Acc-stem	CGU	3.45E-04	15438.7	0.0193936	3.12E-04	13132.7	0.0207054
EBT00051367683	Thr1(CGU)	T	7	Acc-stem	CGU	9.82E-05	15744	0.00777278	1.90E-04	13410.3	0.0165734
EBT00051367683	Thr1(CGU)	T	8	In between	CGU	0.00628979	15867.3	0.00161497	0.00424439	13636.3	0.00479249
EBT00051367683	Thr1(CGU)	A	9	In between	CGU	6.50E-04	15893	0.00703917	3.10E-04	13702	0.00604507
EBT00051367683	Thr1(CGU)	G	10	D-stem	CGU	0.00697816	16005.7	0.0144698	0.00305387	13785.3	0.00886737
EBT00051367683	Thr1(CGU)	C	11	D-stem	CGU	7.62E-04	16240.7	0.0243502	8.89E-04	13908.7	0.0264582
EBT00051367683	Thr1(CGU)	T	12	D-stem	CGU	3.33E-04	16646	0	1.67E-04	14286.7	0
EBT00051367683	Thr1(CGU)	C	13	D-stem	CGU	3.54E-04	16548	0	6.77E-04	14211	0
EBT00051367683	Thr1(CGU)	A	14	D-loop	CGU	1.59E-04	16463	0.023006	2.10E-04	14190.3	0.0208836
EBT00051367683	Thr1(CGU)	G	15	D-loop	CGU	0.00131104	16850.7	0.0346224	6.67E-04	14493	0.0334778
EBT00051367683	Thr1(CGU)	T	16	D-loop	CGU	3.23E-04	17455	0.00156348	5.22E-04	14995	0.00296992
EBT00051367683	Thr1(CGU)	C	17	D-loop	CGU	6.04E-04	17482.3	5.53E-04	7.55E-04	15039.7	3.54E-04
EBT00051367683	Thr1(CGU)	G	18	D-loop	CGU	0.00158049	17492	0.00553366	7.58E-04	15045	0.00623101
EBT00051367683	Thr1(CGU)	G	19	D-loop	CGU	0.00113154	17589.3	0.0209474	0.0012617	15139.3	0.0177981
EBT00051367683	Thr1(CGU)	T	20	D-loop	CGU	5.17E-04	17965.7	0.00553536	5.97E-04	15413.7	0.00589057
EBT00051367683	Thr1(CGU)	A	21	D-loop	CGU	1.65E-05	18065.7	0	1.33E-04	15505	0
EBT00051367683	Thr1(CGU)	G	22	D-stem	CGU	0.00146071	18028.3	0.00397783	5.52E-04	15458	0.00234494
EBT00051367683	Thr1(CGU)	A	23	D-stem	CGU	1.64E-04	18100.3	0.00308432	5.25E-04	15494.3	0.00281031
EBT00051367683	Thr1(CGU)	G	24	D-stem	CGU	0.00129333	18156.3	0.00643902	4.98E-04	15538	0.00231154
EBT00051367683	Thr1(CGU)	C	25	D-stem	CGU	4.59E-04	18274	0.0108082	0.00117621	15574	0.00993834
EBT00051367683	Thr1(CGU)	A	26	In between	CGU	2.13E-04	18473.7	0	2.58E-04	15730.3	0
EBT00051367683	Thr1(CGU)	G	27	Ac-stem	CGU	0.00271136	18395.7	0.0103827	0.00189241	15649.7	0.012307
EBT00051367683	Thr1(CGU)	C	28	Ac-stem	CGU	3.04E-04	18588.7	0.0106974	5.27E-04	15844.7	0.00902704
EBT00051367683	Thr1(CGU)	T	29	Ac-stem	CGU	1.33E-04	18789.7	0	1.93E-04	15989	0
EBT00051367683	Thr1(CGU)	C	30	Ac-stem	CGU	3.61E-04	18726.7	0.0136765	2.89E-04	15937	0.0175485
EBT00051367683	Thr1(CGU)	A	31	Ac-stem	CGU	6.75E-05	18986.3	0.00906402	1.67E-04	16221.7	0.00740393
EBT00051367683	Thr1(CGU)	T	32	Ac-loop	CGU	1.71E-04	19160	0.00754528	1.66E-04	16342.7	0.0108542
EBT00051367683	Thr1(CGU)	T	33	Ac-loop	CGU	2.71E-04	19305.7	9.66E-04	4.02E-04	16522	6.65E-04
EBT00051367683	Thr1(CGU)	C	34	Ac-loop	CGU	9.58E-04	19324.3	0.00487495	8.96E-04	16533	0.00633076
EBT00051367683	Thr1(CGU)	G	35	Ac-loop	CGU	9.20E-04	19419	0.0184823	7.06E-04	16638.3	0.0196406
EBT00051367683	Thr1(CGU)	T	36	Ac-loop	CGU	3.38E-04	19784.7	0.00947899	2.96E-04	16971.7	0.00837472
EBT00051367683	Thr1(CGU)	A	37	Ac-loop	CGU	0.00119086	19974	0.0406033	0.00124212	17115	0.0398676
EBT00051367683	Thr1(CGU)	A	38	Ac-loop	CGU	7.55E-05	20819.3	0.0104566	3.98E-04	17825.7	0.0105464
EBT00051367683	Thr1(CGU)	T	39	Ac-stem	CGU	7.77E-05	21039.3	6.34E-05	2.54E-04	18015.7	7.76E-04
EBT00051367683	Thr1(CGU)	G	40	Ac-stem	CGU	7.00E-04	21040.7	0.00402354	4.96E-04	18029.7	0.00483883
EBT00051367683	Thr1(CGU)	A	41	Ac-stem	CGU	1.84E-04	21125.7	0.00392915	1.97E-04	18117.3	0.00251427
EBT00051367683	Thr1(CGU)	G	42	Ac-stem	CGU	0.00150738	21209	0	9.04E-04	18163	0
EBT00051367683	Thr1(CGU)	A	43	Ac-stem	CGU	2.02E-04	19965.7	0.0671848	3.99E-04	17024	0.0700994
EBT00051367683	Thr1(CGU)	A	44	V-region	CGU	2.61E-04	21403.7	0	1.91E-04	18307.3	0
EBT00051367683	Thr1(CGU)	G	45	V-region	CGU	8.30E-04	21372	0.00124618	6.21E-04	18305	0.00134572
EBT00051367683	Thr1(CGU)	G	46	V-region	CGU	0.00350407	21398.7	0.00961138	0.00237108	18329.7	0.00897508
EBT00051367683	Thr1(CGU)	T	47	V-region	CGU	2.99E-04	21606.3	0	3.47E-04	18495.7	0
EBT00051367683	Thr1(CGU)	C	48	V-region	CGU	6.32E-04	21600.3	0	0.00219338	18489	5.23E-04
EBT00051367683	Thr1(CGU)	G	49	T-stem	CGU	0.00258255	21555.3	0.00257585	0.00256025	18498.7	8.10E-04
EBT00051367683	Thr1(CGU)	G	50	T-stem	CGU	0.00225296	21611	0.00269198	0.00142997	18513.7	0.00217383
EBT00051367683	Thr1(CGU)	G	51	T-stem	CGU	0.00228595	21669.3	0.00344917	0.00119325	18554	0.0029377
EBT00051367683	Thr1(CGU)	G	52	T-stem	CGU	0.00173588	21744.3	0.00269076	8.09E-04	18608.7	0.00219843
EBT00051367683	Thr1(CGU)	G	53	T-stem	CGU	0.001959	21803	0.00677246	5.87E-04	18649.7	0.00531575
EBT00051367683	Thr1(CGU)	T	54	T-loop	CGU	2.50E-04	21951.7	3.04E-04	1.63E-04	18749.3	0
EBT00051367683	Thr1(CGU)	T	55	T-loop	CGU	3.46E-04	21958.3	0	2.38E-04	18740	0
EBT00051367683	Thr1(CGU)	C	56	T-loop	CGU	6.34E-04	21901.7	0.00127681	0.0014734	18669.7	0.00270651
EBT00051367683	Thr1(CGU)	G	57	T-loop	CGU	0.00196201	21929.7	0.00485554	0.00105875	18720.3	0.00476697
EBT00051367683	Thr1(CGU)	A	58	T-loop	CGU	1.75E-04	22036.7	0	1.25E-04	18810	0
EBT00051367683	Thr1(CGU)	T	59	T-loop	CGU	3.05E-04	21947	0	3.00E-04	18714	0
EBT00051367683	Thr1(CGU)	T	60	T-loop	CGU	2.79E-04	21894	0	5.34E-04	18677.3	0
EBT00051367683	Thr1(CGU)	C	61	T-stem	CGU	9.32E-04	21861.7	0	0.00163774	18650.3	0
EBT00051367683	Thr1(CGU)	C	62	T-stem	CGU	9.52E-04	21848.3	0	0.00127281	18637	0
EBT00051367683	Thr1(CGU)	T	63	T-stem	CGU	1.28E-04	21697	0.0099927	2.95E-04	18535.3	0.00827537
EBT00051367683	Thr1(CGU)	C	64	T-stem	CGU	6.96E-04	21916	0	0.00185242	18690	0
EBT00051367683	Thr1(CGU)	T	65	T-stem	CGU	2.56E-04	21291.7	0.0333686	1.62E-04	18283.3	0.0269474
EBT00051367683	Thr1(CGU)	A	66	Acc-stem	CGU	1.92E-04	22026.7	0	2.03E-04	18789.7	0
EBT00051367683	Thr1(CGU)	T	67	Acc-stem	CGU	1.71E-04	21087.7	0.0348305	1.72E-04	18228	0.0228544
EBT00051367683	Thr1(CGU)	C	68	Acc-stem	CGU	6.98E-04	21848.7	0	5.53E-04	18654.3	0
EBT00051367683	Thr1(CGU)	C	69	Acc-stem	CGU	5.40E-04	21837.3	0	6.85E-04	18615.3	0
EBT00051367683	Thr1(CGU)	G	70	Acc-stem	CGU	6.09E-04	21780.3	9.48E-04	7.40E-04	18563.7	0.00152395
EBT00051367683	Thr1(CGU)	G	71	Acc-stem	CGU	6.01E-04	21801	0.00662221	3.80E-04	18592	0.00648379
EBT00051367683	Thr1(CGU)	C	72	Acc-stem	CGU	6.74E-04	21946.3	0.00257541	0.00175568	18713.3	0.00193781
EBT00051367683	Thr1(CGU)	A	73	In between	CGU	5.37E-04	22003	0	6.48E-04	18749.7	0
EBT00051367683	Thr1(CGU)	C	74	CCA	CGU	0	21956	0	2.49E-05	18736.3	0
EBT00051367683	Thr1(CGU)	C	75	CCA	CGU	0	21676.3	0	0	18445.3	0
EBT00051367683	Thr1(CGU)	A	76	CCA	CGU	0	20927.3	0	0	17727.7	0
EBT00051367914	Leu1(CAA)	G	1	Acc-stem	CAA	0	2239	0.0202742	0	1858	0.0146721
EBT00051367914	Leu1(CAA)	C	2	Acc-stem	CAA	0	2285.33	0.0075275	0	1885.67	0.00614898
EBT00051367914	Leu1(CAA)	C	3	Acc-stem	CAA	0	2302.67	0.0151126	0	1897.33	0.0176044
EBT00051367914	Leu1(CAA)	T	4	Acc-stem	CAA	2.74E-04	2338	0.00454158	5.00E-04	1931.33	0.00549262
EBT00051367914	Leu1(CAA)	C	5	Acc-stem	CAA	0.00177648	2348.67	0.00127569	4.97E-04	1942	0
EBT00051367914	Leu1(CAA)	G	6	Acc-stem	CAA	0.00102488	2351.67	0.00479616	8.01E-04	1940.67	0.00580601
EBT00051367914	Leu1(CAA)	G	7	Acc-stem	CAA	0.00113459	2363	0.00950119	0.00160054	1952	0.0126454
EBT00051367914	Leu1(CAA)	T	8	In between	CAA	4.09E-04	2385.67	0	1.34E-04	1977	0
EBT00051367914	Leu1(CAA)	G	9	In between	CAA	0.0013809	2383	0.00735907	0.00136287	1975.33	0.00820084
EBT00051367914	Leu1(CAA)	G	10	D-stem	CAA	0.0022584	2400.67	0	3.44E-04	1991.67	0
EBT00051367914	Leu1(CAA)	C	11	D-stem	CAA	0.00149661	2399.33	0.0115353	0.00190968	1991.33	0.0109272
EBT00051367914	Leu1(CAA)	G	12	D-stem	CAA	0.00104332	2427.33	0.00232909	5.64E-04	2013.33	0.00247729
EBT00051367914	Leu1(CAA)	G	13	D-stem	CAA	0.00136551	2433	0.0111096	3.94E-04	2018.33	0.0154472
EBT00051367914	Leu1(CAA)	A	14	D-loop	CAA	2.73E-04	2460.33	0.0200478	7.10E-04	2050	0.0301214
EBT00051367914	Leu1(CAA)	A	15	D-loop	CAA	4.16E-04	2510.67	0.06155	2.07E-04	2113.67	0.0647493
EBT00051367914	Leu1(CAA)	T	16	D-loop	CAA	7.49E-04	2675.33	0.00508243	2.98E-04	2260	0.00528169
EBT00051367914	Leu1(CAA)	C	17	D-loop	CAA	6.71E-04	2689	0.00234974	0.00175899	2272	0.00248793
EBT00051367914	Leu1(CAA)	G	18	D-loop	CAA	0.00249811	2695.33	0.0146234	0.00182601	2277.67	0.0182471
EBT00051367914	Leu1(CAA)	G	19	D-loop	CAA	0.0030413	2735.33	0.0352692	0.00186803	2320	0.0319889
EBT00051367914	Leu1(CAA)	T	20	D-loop	CAA	0.00131415	2835.33	0	3.92E-04	2396.67	0.00690608
EBT00051367914	Leu1(CAA)	A	20a	D-loop	CAA	4.73E-04	2832.67	0.00828568	0	2413.33	0.00412655
EBT00051367914	Leu1(CAA)	G	21	D-loop	CAA	0.00192078	2856.33	0.0151707	0.0013851	2423.33	0.00696626
EBT00051367914	Leu1(CAA)	A	22	D-stem	CAA	5.08E-04	2900.33	0.0184997	2.17E-04	2440.33	0.0237365
EBT00051367914	Leu1(CAA)	C	23	D-stem	CAA	2.27E-04	2955	0	0.00117495	2499.67	0
EBT00051367914	Leu1(CAA)	G	24	D-stem	CAA	0.00118445	2946.33	0.00338257	0.00138992	2495.67	6.67E-04
EBT00051367914	Leu1(CAA)	C	25	D-stem	CAA	9.41E-04	2956.33	0.00527142	0.00113511	2497.33	0.0041207
EBT00051367914	Leu1(CAA)	G	26	In between	CAA	0.00585846	2972	0.0157854	0.0024942	2507.67	0.0123408
EBT00051367914	Leu1(CAA)	G	27	Ac-stem	CAA	0.00980047	3019.67	0.030812	0.0033709	2539	0.0200695
EBT00051367914	Leu1(CAA)	C	28	Ac-stem	CAA	0.00106632	3115.67	0.00266752	0.0049264	2591	7.71E-04
EBT00051367914	Leu1(CAA)	G	29	Ac-stem	CAA	0.00109782	3124	0.00520115	0.00156501	2593	0.00243652
EBT00051367914	Leu1(CAA)	G	30	Ac-stem	CAA	0.00630393	3140.33	0.0227178	0.0055543	2599.33	0.0219491
EBT00051367914	Leu1(CAA)	A	31	Ac-stem	CAA	0.00151509	3213.33	0	6.88E-04	2657.67	0
EBT00051367914	Leu1(CAA)	T	32	Ac-loop	CAA	0.0110048	3200.33	0.0254771	0.0107994	2647	0.026361
EBT00051367914	Leu1(CAA)	T	33	Ac-loop	CAA	0.0162144	3284	0.104933	0.0162196	2718.67	0.141654
EBT00051367914	Leu1(CAA)	C	34	Ac-loop	CAA	0.0496754	3669	0.331207	0.0476201	3167.33	0.377204
EBT00051367914	Leu1(CAA)	A	35	Ac-loop	CAA	2.79E-04	5486	0.0563614	0.00106822	5085.67	0.0373525
EBT00051367914	Leu1(CAA)	A	36	Ac-loop	CAA	2.44E-04	5813.67	0.111196	2.36E-04	5283	0.114086
EBT00051367914	Leu1(CAA)	A	37	Ac-loop	CAA	0.0824074	6541	0.900208	0.0836065	5963.33	0.895014
EBT00051367914	Leu1(CAA)	A	38	Ac-loop	CAA	9.77E-06	65546.3	0.0413419	5.40E-05	56801.3	0.0384661
EBT00051367914	Leu1(CAA)	T	39	Ac-stem	CAA	5.37E-06	68373	0.00463426	0	59073.7	0.0070095
EBT00051367914	Leu1(CAA)	C	40	Ac-stem	CAA	1.12E-04	68691.3	0	8.05E-05	59490.7	8.96E-05
EBT00051367914	Leu1(CAA)	C	41	Ac-stem	CAA	3.86E-04	68616.3	0.00251976	4.77E-04	59496	0.00125341
EBT00051367914	Leu1(CAA)	G	42	Ac-stem	CAA	0.0034266	68789.7	0.0119314	0.00160537	59570.7	0.00667545
EBT00051367914	Leu1(CAA)	T	43	Ac-stem	CAA	1.88E-04	69620.3	0.00221188	3.08E-04	59971	0.002788
EBT00051367914	Leu1(CAA)	T	44	V-region	CAA	1.76E-04	69774.7	0.00482081	1.79E-04	60138.7	0.00556701
EBT00051367914	Leu1(CAA)	T	V1	V-region	CAA	1.19E-04	70112.7	3.94E-04	2.68E-04	60475.3	7.55E-04
EBT00051367914	Leu1(CAA)	C	V2	V-region	CAA	5.86E-04	70140.3	0.00130046	5.30E-04	60521	0.00110583
EBT00051367914	Leu1(CAA)	T	V3	V-region	CAA	3.13E-04	70231.7	0	1.83E-04	60588	0
EBT00051367914	Leu1(CAA)	G	V4	V-region	CAA	0.00276926	70006.7	6.09E-04	0.00109796	60430	0
EBT00051367914	Leu1(CAA)	G	V8	V-region	CAA	0.00115484	70049.3	0	7.97E-04	60408.7	8.10E-04
EBT00051367914	Leu1(CAA)	C	V9	V-region	CAA	7.18E-04	70034.7	0.00581076	6.10E-04	60457.7	0.00544509
EBT00051367914	Leu1(CAA)	G	V10	V-region	CAA	0.00145297	70444	0.00717843	9.35E-04	60788.7	0.00619608
EBT00051367914	Leu1(CAA)	A	V11	V-region	CAA	1.64E-04	70953.3	0	1.85E-04	61167.7	0
EBT00051367914	Leu1(CAA)	C	V16	V-region	CAA	4.79E-04	70644.7	0	5.41E-04	60902.7	0
EBT00051367914	Leu1(CAA)	A	V17	V-region	CAA	2.28E-04	69561.3	0.0191024	1.86E-04	60049.7	0.0177531
EBT00051367914	Leu1(CAA)	G	V18	V-region	CAA	0.00373602	70916	0	0.00142945	61135	0
EBT00051367914	Leu1(CAA)	A	V19	V-region	CAA	2.00E-04	70782.7	0.00762688	3.26E-04	60997	0.00698401
EBT00051367914	Leu1(CAA)	G	46	V-region	CAA	0.00581495	71326.7	0	0.0035178	61426	0
EBT00051367914	Leu1(CAA)	T	48	V-region	CAA	1.40E-04	71013.3	0.00789807	1.53E-04	61108.7	0.00787955
EBT00051367914	Leu1(CAA)	G	49	T-stem	CAA	0.00426511	71578.7	4.38E-04	0.00225791	61594	4.17E-04
EBT00051367914	Leu1(CAA)	A	50	T-stem	CAA	2.00E-04	71610	0.00477622	1.53E-04	61619.7	0.00406758
EBT00051367914	Leu1(CAA)	G	51	T-stem	CAA	0.00268251	71953.7	0	0.00116583	61871.3	0
EBT00051367914	Leu1(CAA)	A	52	T-stem	CAA	1.89E-04	66220.7	0.0799704	2.14E-04	57600.3	0.0688799
EBT00051367914	Leu1(CAA)	G	53	T-stem	CAA	0.00192494	71976.7	9.21E-04	7.73E-04	61861.3	2.69E-05
EBT00051367914	Leu1(CAA)	T	54	T-loop	CAA	3.13E-04	72043	0.00296625	1.67E-04	61863	0.00284228
EBT00051367914	Leu1(CAA)	T	55	T-loop	CAA	2.64E-04	72257.3	0	2.66E-04	62039.3	0
EBT00051367914	Leu1(CAA)	C	56	T-loop	CAA	4.10E-04	72064.7	0.00176381	6.89E-04	61893	0.00140368
EBT00051367914	Leu1(CAA)	G	57	T-loop	CAA	0.00151278	72192	0.00270304	0.00133463	61980	0.0033447
EBT00051367914	Leu1(CAA)	A	58	T-loop	CAA	3.00E-04	72387.7	0	3.28E-04	62188	0
EBT00051367914	Leu1(CAA)	G	59	T-loop	CAA	0.00221443	72268	0	0.00109978	62041.3	0
EBT00051367914	Leu1(CAA)	T	60	T-loop	CAA	2.81E-04	71924.7	0.00464065	2.87E-04	61765.7	0.00479083
EBT00051367914	Leu1(CAA)	C	61	T-stem	CAA	0.000329829	72260	5.99E-04	4.26E-04	62063	7.73E-04
EBT00051367914	Leu1(CAA)	T	62	T-stem	CAA	1.53E-04	72303.3	6.91E-05	1.70E-04	62111	0
EBT00051367914	Leu1(CAA)	C	63	T-stem	CAA	3.12E-04	72308.3	3.23E-05	2.97E-04	62101.7	0
EBT00051367914	Leu1(CAA)	T	64	T-stem	CAA	2.00E-04	72310.7	0	3.36E-04	62072.7	0
EBT00051367914	Leu1(CAA)	C	65	T-stem	CAA	4.13E-04	72045.7	0	5.57E-04	61829.7	0
EBT00051367914	Leu1(CAA)	C	66	Acc-stem	CAA	6.05E-04	71615.7	0.00631325	8.24E-04	61455.7	0.00694295
EBT00051367914	Leu1(CAA)	C	67	Acc-stem	CAA	5.51E-04	72070.7	0.00154701	7.74E-04	61885.3	0.0015757
EBT00051367914	Leu1(CAA)	G	68	Acc-stem	CAA	0.00122176	72182.3	0.00370825	6.44E-04	61983	0.00354215
EBT00051367914	Leu1(CAA)	A	69	Acc-stem	CAA	1.72E-04	72451	0	1.91E-04	62203.3	0
EBT00051367914	Leu1(CAA)	G	70	Acc-stem	CAA	6.93E-04	72222.3	0	2.23E-04	62026.3	0
EBT00051367914	Leu1(CAA)	G	71	Acc-stem	CAA	7.83E-04	72084.3	0	5.30E-04	61862.7	0
EBT00051367914	Leu1(CAA)	C	72	Acc-stem	CAA	7.41E-04	72005	0.00627933	6.92E-04	61827.7	0.00644398
EBT00051367914	Leu1(CAA)	A	73	In between	CAA	6.22E-04	72460	0	6.42E-04	62228.7	0
EBT00051367914	Leu1(CAA)	C	74	CCA	CAA	9.82E-06	72082	0	1.34E-05	61892	0
EBT00051367914	Leu1(CAA)	C	75	CCA	CAA	0	71656	0	0	61537.7	0
EBT00051367914	Leu1(CAA)	A	76	CCA	CAA	0	69990.7	0	0	59876.7	0
EBT00051367983	Leu1(CAG)	G	1	Acc-stem	CAG	0	46065.3	0.0198518	0	38514.3	0.0136922
EBT00051367983	Leu1(CAG)	C	2	Acc-stem	CAG	0	46998.3	0.00792283	0	39049	0.0081954
EBT00051367983	Leu1(CAG)	C	3	Acc-stem	CAG	0	47373.7	9.77E-04	0	39371.7	0
EBT00051367983	Leu1(CAG)	C	4	Acc-stem	CAG	5.68E-04	47420	0	6.80E-04	39366.3	0
EBT00051367983	Leu1(CAG)	A	5	Acc-stem	CAG	0.00269583	45986.7	0.0450084	0.00234617	37980	0.0506978
EBT00051367983	Leu1(CAG)	G	6	Acc-stem	CAG	4.62E-04	48154	0.00686099	3.84E-04	40008.3	0.00777905
EBT00051367983	Leu1(CAG)	G	7	Acc-stem	CAG	0.00140401	48486.7	0.0106983	0.00153103	40322	0.0103735
EBT00051367983	Leu1(CAG)	T	8	In between	CAG	0.00102527	49011	0.00166352	7.82E-04	40744.7	0.00179659
EBT00051367983	Leu1(CAG)	G	9	In between	CAG	0.00378804	49092.7	0.0166126	0.00255851	40818	0.017964
EBT00051367983	Leu1(CAG)	G	10	D-stem	CAG	0.00328636	49922	0.00853332	0.00292397	41564.7	0.00773479
EBT00051367983	Leu1(CAG)	C	11	D-stem	CAG	0.00140824	50351.7	0.0141364	0.0031631	41888.7	0.0156736
EBT00051367983	Leu1(CAG)	G	12	D-stem	CAG	0.00167929	51073.7	0.00620067	0.00104819	42555.7	0.00477861
EBT00051367983	Leu1(CAG)	G	13	D-stem	CAG	0.00157162	51392.3	0.0250416	0.00100886	42760	0.015087
EBT00051367983	Leu1(CAG)	A	14	D-loop	CAG	0.00172161	52712.3	0.139381	0.0017443	43415	0.129908
EBT00051367983	Leu1(CAG)	A	15	D-loop	CAG	2.54E-04	61249.3	0.10942	3.44E-04	49897	0.114034
EBT00051367983	Leu1(CAG)	T	16	D-loop	CAG	1.56E-04	68774.7	0.0155076	1.65E-04	56319.3	0.0172518
EBT00051367983	Leu1(CAG)	T	17	D-loop	CAG	5.33E-04	69858	0.00947168	5.40E-04	57308	0.0105264
EBT00051367983	Leu1(CAG)	G	18	D-loop	CAG	0.00206369	70526	0.0204994	0.001512	57917.7	0.0194803
EBT00051367983	Leu1(CAG)	G	19	D-loop	CAG	0.00140924	72002	0.0289247	0.00104586	59068.3	0.0364109
EBT00051367983	Leu1(CAG)	T	20	D-loop	CAG	0.00101828	74146.7	0.00453339	8.67E-04	61300.3	0.00658492
EBT00051367983	Leu1(CAG)	A	20a	D-loop	CAG	2.84E-04	74484.3	0.0013363	2.51E-04	61706.7	9.98E-04
EBT00051367983	Leu1(CAG)	G	21	D-loop	CAG	0.00189637	74584	0.0241698	0.00179134	61768.3	0.0251107
EBT00051367983	Leu1(CAG)	A	22	D-stem	CAG	1.76E-04	76431.3	0.00103254	1.14E-04	63359.3	0.00155483
EBT00051367983	Leu1(CAG)	C	23	D-stem	CAG	6.24E-04	76510.3	0.0011532	0.00106893	63458	0.00111236
EBT00051367983	Leu1(CAG)	G	24	D-stem	CAG	9.27E-04	76598.7	0.00290283	9.88E-04	63528.7	0.00424247
EBT00051367983	Leu1(CAG)	C	25	D-stem	CAG	5.70E-04	76821.7	0.0144456	0.00110207	63799.3	0.0214876
EBT00051367983	Leu1(CAG)	A	26	In between	CAG	2.32E-04	77947.7	0.00646233	3.03E-04	65200.3	0.00932927
EBT00051367983	Leu1(CAG)	C	27	Ac-stem	CAG	5.66E-04	78454.7	0.0163493	5.65E-04	65814.3	0.0252183
EBT00051367983	Leu1(CAG)	T	28	Ac-stem	CAG	2.27E-04	79758.7	0.00140227	1.73E-04	67517	0.00213809
EBT00051367983	Leu1(CAG)	A	29	Ac-stem	CAG	2.70E-04	79870.7	0.00236905	1.93E-04	67661.7	0.00267284
EBT00051367983	Leu1(CAG)	G	30	Ac-stem	CAG	0.00120624	80060.3	0.00172903	8.84E-04	67843	0.0015404
EBT00051367983	Leu1(CAG)	G	31	Ac-stem	CAG	8.97E-04	80199	0.0258205	5.97E-04	67947.7	0.0361942
EBT00051367983	Leu1(CAG)	T	32	Ac-loop	CAG	4.15E-04	82324.7	0.00966778	3.10E-04	70499.3	0.0157802
EBT00051367983	Leu1(CAG)	T	33	Ac-loop	CAG	2.89E-04	83128.3	9.13E-04	2.81E-04	71629.7	0.00213607
EBT00051367983	Leu1(CAG)	C	34	Ac-loop	CAG	6.81E-04	83204.3	0	7.61E-04	71783	0
EBT00051367983	Leu1(CAG)	A	35	Ac-loop	CAG	0.103373	75192.3	0.152428	0.117223	64831	0.177668
EBT00051367983	Leu1(CAG)	G	36	Ac-loop	CAG	1.98E-04	88715	0.0183426	1.38E-04	78838	0.021679
EBT00051367983	Leu1(CAG)	G	37	Ac-loop	CAG	0.662485	90372.7	0.622734	0.62996	80585	0.637824
EBT00051367983	Leu1(CAG)	T	38	Ac-loop	CAG	9.86E-05	239546	0.00370299	1.02E-04	222502	0.00384727
EBT00051367983	Leu1(CAG)	C	39	Ac-stem	CAG	2.17E-04	240436	0.00342641	2.52E-04	223362	0.00284822
EBT00051367983	Leu1(CAG)	C	40	Ac-stem	CAG	2.05E-04	241263	0.00553026	2.10E-04	224000	0.00557442
EBT00051367983	Leu1(CAG)	T	41	Ac-stem	CAG	2.46E-04	242605	0	2.75E-04	225255	0
EBT00051367983	Leu1(CAG)	A	42	Ac-stem	CAG	9.86E-04	242297	0.00406653	9.47E-04	224939	0.00361601
EBT00051367983	Leu1(CAG)	G	43	Ac-stem	CAG	0.00570264	243287	0.0101741	0.00525952	225755	0.0101822
EBT00051367983	Leu1(CAG)	C	44	V-region	CAG	5.45E-04	245787	0.00328066	9.41E-04	228077	0.00296968
EBT00051367983	Leu1(CAG)	G	V1	V-region	CAG	9.58E-04	246596	0.0015723	4.96E-04	228757	0.00130391
EBT00051367983	Leu1(CAG)	G	V2	V-region	CAG	5.70E-04	246985	0.00123876	3.29E-04	229055	2.74E-04
EBT00051367983	Leu1(CAG)	T	V3	V-region	CAG	0.000177711	247291	0.00221245	1.88E-04	229118	0.00213987
EBT00051367983	Leu1(CAG)	G	V4	V-region	CAG	8.52E-04	247839	0.0011674	4.26E-04	229609	4.98E-04
EBT00051367983	Leu1(CAG)	G	V8	V-region	CAG	8.11E-04	248129	0.00277444	4.29E-04	229724	0.00327435
EBT00051367983	Leu1(CAG)	C	V9	V-region	CAG	8.45E-04	248819	0.00519619	0.00129148	230478	0.00462823
EBT00051367983	Leu1(CAG)	A	V10	V-region	CAG	3.08E-04	250119	0.00651548	3.44E-04	231550	0.00638807
EBT00051367983	Leu1(CAG)	A	V11	V-region	CAG	1.71E-04	251759	0	1.76E-04	233039	0
EBT00051367983	Leu1(CAG)	C	V16	V-region	CAG	5.63E-04	250975	0.00687738	8.14E-04	232486	0.00535785
EBT00051367983	Leu1(CAG)	A	V17	V-region	CAG	1.49E-04	252713	0.00842813	1.38E-04	233738	0.00890302
EBT00051367983	Leu1(CAG)	C	V18	V-region	CAG	4.53E-04	254861	2.46E-04	5.88E-04	235838	2.77E-04
EBT00051367983	Leu1(CAG)	C	V19	V-region	CAG	3.57E-04	254923	9.81E-05	4.97E-04	235903	0
EBT00051367983	Leu1(CAG)	G	46	V-region	CAG	0.00206497	254948	0	0.00208963	235809	0
EBT00051367983	Leu1(CAG)	T	48	V-region	CAG	1.84E-04	254250	0.00616433	2.04E-04	235272	0.00630302
EBT00051367983	Leu1(CAG)	G	49	T-stem	CAG	0.00225761	255827	0.00338274	0.00206668	236765	0.00345839
EBT00051367983	Leu1(CAG)	G	50	T-stem	CAG	0.00269299	256695	0.00315847	0.00200729	237586	0.00261674
EBT00051367983	Leu1(CAG)	A	51	T-stem	CAG	0.000165258	257508	0.00140123	1.55E-04	238210	0.00136109
EBT00051367983	Leu1(CAG)	A	52	T-stem	CAG	1.95E-04	257870	0.00177552	2.15E-04	238534	0.00209592
EBT00051367983	Leu1(CAG)	G	53	T-stem	CAG	8.74E-04	258328	0.00286794	6.95E-04	239035	0.00272992
EBT00051367983	Leu1(CAG)	T	54	T-loop	CAG	1.84E-04	259071	0.00177371	2.07E-04	239690	0.00179354
EBT00051367983	Leu1(CAG)	T	55	T-loop	CAG	2.91E-04	259532	0	2.97E-04	240120	0
EBT00051367983	Leu1(CAG)	C	56	T-loop	CAG	9.56E-04	257505	0.00702844	0.00184909	238140	0.00752945
EBT00051367983	Leu1(CAG)	G	57	T-loop	CAG	0.00265662	259327	0	0.00178415	239947	0
EBT00051367983	Leu1(CAG)	A	58	T-loop	CAG	2.27E-04	257830	0.00603838	1.56E-04	238444	0.00652749
EBT00051367983	Leu1(CAG)	G	59	T-loop	CAG	0.00339507	259396	6.94E-05	0.00165512	240011	0
EBT00051367983	Leu1(CAG)	T	60	T-loop	CAG	2.15E-04	259414	0	2.40E-04	240009	0
EBT00051367983	Leu1(CAG)	C	61	T-stem	CAG	4.95E-04	259346	0	6.68E-04	239918	0
EBT00051367983	Leu1(CAG)	T	62	T-stem	CAG	1.71E-04	259167	0	1.66E-04	239821	0
EBT00051367983	Leu1(CAG)	T	63	T-stem	CAG	1.79E-04	258640	0.00106984	2.05E-04	239416	6.57E-04
EBT00051367983	Leu1(CAG)	C	64	T-stem	CAG	6.03E-04	258917	0.00226714	0.00123563	239573	0.00242067
EBT00051367983	Leu1(CAG)	T	65	T-stem	CAG	2.20E-04	259505	0	1.84E-04	240154	0
EBT00051367983	Leu1(CAG)	C	66	Acc-stem	CAG	7.58E-04	258551	0.00133001	0.00164266	239163	0.00128478
EBT00051367983	Leu1(CAG)	C	67	Acc-stem	CAG	4.97E-04	258895	0	7.35E-04	239471	0
EBT00051367983	Leu1(CAG)	T	68	Acc-stem	CAG	2.74E-04	252180	0.0033816	2.93E-04	233745	0.00285392
EBT00051367983	Leu1(CAG)	G	69	Acc-stem	CAG	7.83E-04	253036	0.0119255	6.69E-04	234414	0.00977213
EBT00051367983	Leu1(CAG)	G	70	Acc-stem	CAG	8.66E-04	256090	0.0114251	6.16E-04	236728	0.0122409
EBT00051367983	Leu1(CAG)	G	71	Acc-stem	CAG	9.04E-04	259050	0	5.73E-04	239661	2.27E-04
EBT00051367983	Leu1(CAG)	C	72	Acc-stem	CAG	0.00113501	259030	0.00436644	0.00170629	239716	0.00417772
EBT00051367983	Leu1(CAG)	A	73	In between	CAG	6.55E-04	260166	0	6.56E-04	240721	0
EBT00051367983	Leu1(CAG)	C	74	CCA	CAG	2.50E-05	258807	0	1.48E-05	239454	0
EBT00051367983	Leu1(CAG)	C	75	CCA	CAG	0	254961	0	0	235441	0
EBT00051367983	Leu1(CAG)	A	76	CCA	CAG	0	247048	0	0	227144	0
EBT00051368081	Pro1(UGG)	C	1	Acc-stem	UGG	0	31080.7	0.0128943	0	26011.7	0.0145603
EBT00051368081	Pro1(UGG)	G	2	Acc-stem	UGG	0	31486.7	0.00222877	0	26396	0.00175224
EBT00051368081	Pro1(UGG)	G	3	Acc-stem	UGG	0	31557	0.00217123	0	26442.3	0.00257758
EBT00051368081	Pro1(UGG)	G	4	Acc-stem	UGG	7.58E-04	31625.7	0.0056281	6.91E-04	26510.7	0.00700436
EBT00051368081	Pro1(UGG)	G	5	Acc-stem	UGG	9.13E-04	31804.7	0.00534782	4.73E-04	26697.7	0.00553769
EBT00051368081	Pro1(UGG)	T	6	Acc-stem	UGG	6.30E-04	31975.7	0.00208058	7.19E-04	26846.3	0.00558087
EBT00051368081	Pro1(UGG)	A	7	Acc-stem	UGG	2.01E-04	32042.3	0.0269365	1.78E-04	26997	0.0337394
EBT00051368081	Pro1(UGG)	T	8	In between	UGG	0.0433746	32929.3	0.0123867	0.0366032	27939.7	0.0131278
EBT00051368081	Pro1(UGG)	A	9	In between	UGG	6.27E-04	33342.3	0.00927072	9.20E-04	28311.3	0.0112687
EBT00051368081	Pro1(UGG)	G	10	D-stem	UGG	0.00377595	33654.3	0.00370049	0.00346141	28634	0.00613199
EBT00051368081	Pro1(UGG)	C	11	D-stem	UGG	8.99E-04	33779.3	0.00869633	0.00131419	28810.7	0.00790854
EBT00051368081	Pro1(UGG)	G	12	D-stem	UGG	0.00160493	34075.7	0	9.08E-04	29040.3	0
EBT00051368081	Pro1(UGG)	C	13	D-stem	UGG	7.57E-04	33138.3	0.0164137	0.00128863	28163	0.0161741
EBT00051368081	Pro1(UGG)	A	14	D-loop	UGG	2.43E-04	33691.3	0.0236377	3.24E-04	28626	0.0275394
EBT00051368081	Pro1(UGG)	G	15	D-loop	UGG	0.0021371	34507	0.010183	0.00120232	29436.7	0.00999978
EBT00051368081	Pro1(UGG)	T	16	D-loop	UGG	4.17E-04	34862	0.00113653	2.40E-04	29734	0.00240446
EBT00051368081	Pro1(UGG)	C	17	D-loop	UGG	5.45E-04	34901.7	0	6.93E-04	29805.7	0
EBT00051368081	Pro1(UGG)	C	17a	D-loop	UGG	6.55E-04	34791	0.00694557	9.51E-04	29737	0.00830388
EBT00051368081	Pro1(UGG)	G	18	D-loop	UGG	0.00266457	35034.3	0.0035458	0.00244584	29986	0.00545046
EBT00051368081	Pro1(UGG)	G	19	D-loop	UGG	0.00247768	35159	0.0177496	0.00169812	30150.3	0.0202236
EBT00051368081	Pro1(UGG)	T	20	D-loop	UGG	9.19E-04	35794.3	0.00208165	0.00100302	30772.7	0.00393815
EBT00051368081	Pro1(UGG)	A	21	D-loop	UGG	1.27E-04	35869	0.00428426	1.06E-04	30894.3	0.00519497
EBT00051368081	Pro1(UGG)	G	22	D-stem	UGG	0.00309443	36023.3	0.00465116	0.00172975	31055.7	0.00221689
EBT00051368081	Pro1(UGG)	C	23	D-stem	UGG	0.00115702	36191.7	0.00446535	0.0025584	31124.7	0.00519912
EBT00051368081	Pro1(UGG)	G	24	D-stem	UGG	0.00276623	36354	0.00479071	0.00183278	31287.3	0.00408501
EBT00051368081	Pro1(UGG)	C	25	D-stem	UGG	8.54E-04	36529	0.00179443	0.00148627	31415.7	0.0024239
EBT00051368081	Pro1(UGG)	G	26	In between	UGG	0.00314714	36594.7	0.00542656	0.00253443	31492	0.00490826
EBT00051368081	Pro1(UGG)	C	27	Ac-stem	UGG	0.00109768	36794.3	1.99E-04	0.00237626	31647.3	1.00E-03
EBT00051368081	Pro1(UGG)	C	28	Ac-stem	UGG	4.05E-04	36801.7	0.00188945	7.62E-04	31679	0.00127157
[truncated: 1,405 more rows]
