# Supplementary material
Source: HighWire-hosted journal article supplement (doi:10.1101/rna.080004.124)
Supplement: SuppTable14.xlsx [file SuppTable14.xlsx]

## Sheet: Sheet1
ID	Sequence
irCLIPadaptor	AGATCGGAAGAGCGGTTCAGAAAAAAAAAAAA/iAzideN/AAAAAAAAAAAA/3Bio/
icSHAPEadaptor (not 3' blocked!)	AGA TCG GAA GAG CGG TTC AGA AAA AAA AAA AA/iAzideN/ AAA AAA AAA AAA
nADAPTOR	AGA TCG GAA GAG CGG TTC AGA AAA AAA AAA AA/iAzideN/ AAA AAA AAA AAA /3ddc/
P3tall	GCATTCCTGCTGAACCGCTCTTCCGATCT
P6tall	TTTCCCCTTGTGTGTGAAGCGAAGGGTA
P3solexa	CAAGCAGAAGACGGCATACGAGATCGGTCTCGGCATTCCTGCTGAACCGCTCTTCCGATCT
P6solexa	AATGATACGGCGACCACCGAGATCTACACTCTTTCCCCTTGTGTGTGAAGCGAAGGGTA
P6 sequencing primer	CACTCTTTCCCCTTGTGTGTGAAGCGAAGGGTA
RTprimer1	/5phos/(W1:50000050)(W1)(W1)(N1:25252525)(N1)(N1)ATCACG(N1)(N1)(N1)(N1)(N1)TACCCTTCGCTTCACACACAAG/iSp18/GGATCC/iSp18/TACTGAACCGC
RTprimer2	/5phos/(W1:50000050)(W1)(W1)(N1:25252525)(N1)(N1)CGATGT(N1)(N1)(N1)(N1)(N1)TACCCTTCGCTTCACACACAAG/iSp18/GGATCC/iSp18/TACTGAACCGC
RTprimer3	/5phos/(W1:50000050)(W1)(W1)(N1:25252525)(N1)(N1)TTAGGC(N1)(N1)(N1)(N1)(N1)TACCCTTCGCTTCACACACAAG/iSp18/GGATCC/iSp18/TACTGAACCGC
RTprimer4	/5phos/(W1:50000050)(W1)(W1)(N1:25252525)(N1)(N1)TGACCA(N1)(N1)(N1)(N1)(N1)TACCCTTCGCTTCACACACAAG/iSp18/GGATCC/iSp18/TACTGAACCGC
RTprimer5	/5Phos/(W1:50000050)(W1)(W1)(N1:25252525)(N1)(N1)ACAGTG(N1)(N1)(N1)(N1)(N1)TACCCTTCGCTTCACACACAAG/iSp18/GGATCC/iSp18/TACTGAACCGC
RTprimer6	/5Phos/(W1:50000050)(W1)(W1)(N1:25252525)(N1)(N1)GCCAAT(N1)(N1)(N1)(N1)(N1)TACCCTTCGCTTCACACACAAG/iSp18/GGATCC/iSp18/TACTGAACCGC
RTprimer7	/5Phos/(W1:50000050)(W1)(W1)(N1:25252525)(N1)(N1)CAGATC(N1)(N1)(N1)(N1)(N1)TACCCTTCGCTTCACACACAAG/iSp18/GGATCC/iSp18/TACTGAACCGC
RTprimer8	/5Phos/(W1:50000050)(W1)(W1)(N1:25252525)(N1)(N1)ACTTGA(N1)(N1)(N1)(N1)(N1)TACCCTTCGCTTCACACACAAG/iSp18/GGATCC/iSp18/TACTGAACCGC
RTprimer9	/5Phos/(W1:50000050)(W1)(W1)(N1:25252525)(N1)(N1)GATCAG(N1)(N1)(N1)(N1)(N1)TACCCTTCGCTTCACACACAAG/iSp18/GGATCC/iSp18/TACTGAACCGC
RTprimer10	/5Phos/(W1:50000050)(W1)(W1)(N1:25252525)(N1)(N1)TAGCTT(N1)(N1)(N1)(N1)(N1)TACCCTTCGCTTCACACACAAG/iSp18/GGATCC/iSp18/TACTGAACCGC
RTprimer11	/5Phos/(W1:50000050)(W1)(W1)(N1:25252525)(N1)(N1)GGCTAC(N1)(N1)(N1)(N1)(N1)TACCCTTCGCTTCACACACAAG/iSp18/GGATCC/iSp18/TACTGAACCGC
RTprimer12	/5Phos/(W1:50000050)(W1)(W1)(N1:25252525)(N1)(N1)CTTGTA(N1)(N1)(N1)(N1)(N1)TACCCTTCGCTTCACACACAAG/iSp18/GGATCC/iSp18/TACTGAACCGC
RTprimer13	/5Phos/(W1:50000050)(W1)(W1)(N1:25252525)(N1)(N1)AGTCAA(N1)(N1)(N1)(N1)(N1)TACCCTTCGCTTCACACACAAG/iSp18/GGATCC/iSp18/TACTGAACCGC
RTprimer14	/5Phos/(W1:50000050)(W1)(W1)(N1:25252525)(N1)(N1)AGTTCC(N1)(N1)(N1)(N1)(N1)TACCCTTCGCTTCACACACAAG/iSp18/GGATCC/iSp18/TACTGAACCGC
RTprimer15	/5Phos/(W1:50000050)(W1)(W1)(N1:25252525)(N1)(N1)ATGTCA(N1)(N1)(N1)(N1)(N1)TACCCTTCGCTTCACACACAAG/iSp18/GGATCC/iSp18/TACTGAACCGC
RTprimer16	/5Phos/(W1:50000050)(W1)(W1)(N1:25252525)(N1)(N1)CCGTCC(N1)(N1)(N1)(N1)(N1)TACCCTTCGCTTCACACACAAG/iSp18/GGATCC/iSp18/TACTGAACCGC
RTprimer17	/5Phos/(W1:50000050)(W1)(W1)(N1:25252525)(N1)(N1)GTCCGC(N1)(N1)(N1)(N1)(N1)TACCCTTCGCTTCACACACAAG/iSp18/GGATCC/iSp18/TACTGAACCGC
RTprimer18	/5Phos/(W1:50000050)(W1)(W1)(N1:25252525)(N1)(N1)GTGAAA(N1)(N1)(N1)(N1)(N1)TACCCTTCGCTTCACACACAAG/iSp18/GGATCC/iSp18/TACTGAACCGC
RTprimer19	/5Phos/(W1:50000050)(W1)(W1)(N1:25252525)(N1)(N1)GTGGCC(N1)(N1)(N1)(N1)(N1)TACCCTTCGCTTCACACACAAG/iSp18/GGATCC/iSp18/TACTGAACCGC
RTprimer20	/5Phos/(W1:50000050)(W1)(W1)(N1:25252525)(N1)(N1)GTTTCG(N1)(N1)(N1)(N1)(N1)TACCCTTCGCTTCACACACAAG/iSp18/GGATCC/iSp18/TACTGAACCGC
RTprimer21	/5Phos/(W1:50000050)(W1)(W1)(N1:25252525)(N1)(N1)CGTACG(N1)(N1)(N1)(N1)(N1)TACCCTTCGCTTCACACACAAG/iSp18/GGATCC/iSp18/TACTGAACCGC
RTprimer22	5Phos/(W1:50000050)(W1)(W1)(N1:25252525)(N1)(N1)GAGTGG(N1)(N1)(N1)(N1)(N1)TACCCTTCGCTTCACACACAAG/iSp18/GGATCC/iSp18/TACTGAACCGC
RTprimer23	/5Phos/(W1:50000050)(W1)(W1)(N1:25252525)(N1)(N1)ACTGAT(N1)(N1)(N1)(N1)(N1)TACCCTTCGCTTCACACACAAG/iSp18/GGATCC/iSp18/TACTGAACCGC
RTprimer24	/5Phos/(W1:50000050)(W1)(W1)(N1:25252525)(N1)(N1)ATTCCT(N1)(N1)(N1)(N1)(N1)TACCCTTCGCTTCACACACAAG/iSp18/GGATCC/iSp18/TACTGAACCGC
RTprimer25	/5Phos/(W1:50000050)(W1)(W1)(N1:25252525)(N1)(N1)CAACTA(N1)(N1)(N1)(N1)(N1)TACCCTTCGCTTCACACACAAG/iSp18/GGATCC/iSp18/TACTGAACCGC
RTprimer26	/5Phos/(W1:50000050)(W1)(W1)(N1:25252525)(N1)(N1)CACCGG(N1)(N1)(N1)(N1)(N1)TACCCTTCGCTTCACACACAAG/iSp18/GGATCC/iSp18/TACTGAACCGC
RTprimer27	/5Phos/(W1:50000050)(W1)(W1)(N1:25252525)(N1)(N1)CACGAT(N1)(N1)(N1)(N1)(N1)TACCCTTCGCTTCACACACAAG/iSp18/GGATCC/iSp18/TACTGAACCGC
RTprimer28	/5Phos/(W1:50000050)(W1)(W1)(N1:25252525)(N1)(N1)CACTCA(N1)(N1)(N1)(N1)(N1)TACCCTTCGCTTCACACACAAG/iSp18/GGATCC/iSp18/TACTGAACCGC
PA Arg1(ACG)_RT oligo from 3'end of tRNA	CGCACTCAGGAGGATTC
Forward PCR oligo for Arg1 + 5' adapter	GACTGGAGTTCAGACGTGTGCTCTTCCGATCTGCACTCATAGCTCAGCTG
Fwd-sanger sequencing primer	GACTGGAGTTCAGACGTG
